# Supplementary material for: Duodenal mucosal mitochondrial gene expression is associated with delayed gastric emptying in diabetic gastroenteropathy
Source: PubMed Central journal article supplement (PMC7934845; doi:10.1172/jci.insight.143596), 2021-01-25
Supplement: jciinsight-6-143596-s037.pdf [file jciinsight-6-143596-s037.pdf]

**Supplementary Table 1. List of all differentially expressed genes (N = 3175) between DGE and healthy controls**

| Gene symbol    | Ensembl ID      | Length | log2FC   | P value  | FDR      |
|----------------|-----------------|--------|----------|----------|----------|
| RNA28S5        | ENSG00000226958 | 432    | -5.38228 | 1.45E-27 | 3.95E-23 |
| RNA45S5        | ENSG00000225840 | 599    | -4.12477 | 3.18E-24 | 4.35E-20 |
| RN7SL438P      | ENSG00000241774 | 271    | -3.967   | 1.02E-11 | 3.48E-08 |
| U3             | ENSG00000199666 | 215    | -3.67525 | 4.1E-06  | 0.00082  |
| KRT5           | ENSG00000186081 | 4292   | -3.18203 | 4.61E-07 | 0.000208 |
| RP11-846F4.9   | ENSG00000264316 | 781    | -3.13693 | 3.64E-09 | 5.86E-06 |
| EEF1A1P42      | ENSG00000277043 | 1331   | -2.83984 | 8.81E-08 | 7.77E-05 |
| LINC00939      | ENSG00000249267 | 6471   | -2.64337 | 3.39E-10 | 7.72E-07 |
| MTRNR2L1       | ENSG00000256618 | 1553   | -2.4514  | 2.39E-10 | 5.94E-07 |
| AL353644.10    | ENSG00000277048 | 57     | -2.43427 | 3.37E-20 | 3.07E-16 |
| MT-RNR1        | ENSG00000211459 | 954    | -2.37334 | 1.77E-18 | 1.21E-14 |
| MTRNR2L10      | ENSG00000256045 | 1530   | -2.13777 | 1.02E-06 | 0.000366 |
| AL161626.1     | ENSG00000241781 | 57     | -1.96921 | 1.53E-06 | 0.00048  |
| NOS2P1         | ENSG00000264216 | 1647   | -1.94841 | 0.000129 | 0.005521 |
| RP11-475J5.6   | ENSG00000270906 | 1375   | -1.93253 | 0.000185 | 0.006705 |
| MTRNR2L12      | ENSG00000269028 | 1049   | -1.71922 | 1.64E-09 | 2.98E-06 |
| MT-TV          | ENSG00000210077 | 69     | -1.53028 | 2.02E-07 | 0.000123 |
| KRT13          | ENSG00000171401 | 2913   | -1.41572 | 0.005425 | 0.047709 |
| MTATP8P1       | ENSG00000240409 | 207    | -1.40279 | 1.22E-15 | 6.68E-12 |
| MT-RNR2        | ENSG00000210082 | 1559   | -1.3983  | 1.48E-10 | 4.05E-07 |
| PDIA3P2        | ENSG00000224677 | 158    | -1.32399 | 0.00267  | 0.030946 |
| RP11-249C24.10 | ENSG00000260823 | 444    | -1.2183  | 0.000246 | 0.007896 |
| RP11-846F4.6   | ENSG00000240103 | 2247   | -1.19995 | 0.001757 | 0.023972 |
| MT-ATP8        | ENSG00000228253 | 207    | -1.19839 | 1.1E-13  | 5.02E-10 |
| MT-ND1         | ENSG00000198888 | 956    | -1.18933 | 7.58E-10 | 1.59E-06 |
| FTH1P8         | ENSG00000219507 | 514    | -1.17179 | 3.59E-05 | 0.002905 |
| AL353644.4     | ENSG00000275104 | 180    | -1.15406 | 0.005401 | 0.047601 |
| AGAP7P         | ENSG00000264204 | 2062   | -1.15104 | 0.001349 | 0.020377 |
| MTRNR2L4       | ENSG00000232196 | 1762   | -1.12172 | 4.71E-08 | 5.16E-05 |
| MT-ND6         | ENSG00000198695 | 525    | -1.11467 | 2.34E-08 | 2.78E-05 |
| MT-ND5         | ENSG00000198786 | 1812   | -1.10773 | 5.86E-08 | 5.94E-05 |
| FMO1           | ENSG00000010932 | 3602   | -1.09699 | 9.92E-05 | 0.004942 |
| RP11-320N7.2   | ENSG00000256969 | 588    | -1.09378 | 0.000155 | 0.006058 |
| MT-ND4L        | ENSG00000212907 | 297    | -1.08607 | 9.66E-10 | 1.89E-06 |
| MTATP6P1       | ENSG00000248527 | 681    | -1.08058 | 5.71E-13 | 2.23E-09 |
| RP11-378E13.3  | ENSG00000276054 | 735    | -1.0466  | 1.5E-05  | 0.001714 |
| AC092071.1     | ENSG00000269353 | 549    | -1.022   | 0.000163 | 0.006205 |

|                  |                 |       |          |          |          |
|------------------|-----------------|-------|----------|----------|----------|
| NOS2             | ENSG00000007171 | 4176  | -1.00671 | 0.000339 | 0.009347 |
| RP11-354P11.4    | ENSG00000264125 | 697   | -0.9862  | 8.45E-06 | 0.001248 |
| MTND1P23         | ENSG00000225972 | 372   | -0.98074 | 9.4E-08  | 7.95E-05 |
| RP11-958N24.2    | ENSG00000227827 | 9932  | -0.98011 | 0.005696 | 0.048985 |
| MT-ND2           | ENSG00000198763 | 1042  | -0.9705  | 1.38E-07 | 0.000103 |
| MT-ATP6          | ENSG00000198899 | 681   | -0.96332 | 1.95E-11 | 5.93E-08 |
| MIR7846          | ENSG00000275459 | 96    | -0.96055 | 6.05E-05 | 0.003803 |
| GSTA3            | ENSG00000174156 | 1025  | -0.9426  | 0.000458 | 0.011014 |
| CYP4F23P         | ENSG00000269516 | 1579  | -0.93144 | 0.000176 | 0.006546 |
| MT-ND4           | ENSG00000198886 | 1378  | -0.93061 | 1.42E-07 | 0.000103 |
| RP1-66C13.4      | ENSG00000266202 | 582   | -0.92236 | 5.96E-05 | 0.0038   |
| RN7SL743P        | ENSG00000243954 | 298   | -0.91401 | 3.92E-05 | 0.002999 |
| MIR4728          | ENSG00000265178 | 67    | -0.91209 | 9.01E-05 | 0.004712 |
| EGR3             | ENSG00000179388 | 4855  | -0.90241 | 0.000187 | 0.006739 |
| MT-TE            | ENSG00000210194 | 69    | -0.89899 | 9.14E-06 | 0.001298 |
| RP11-640A1.4     | ENSG00000267487 | 259   | -0.87907 | 8.33E-05 | 0.004484 |
| SNRPCP14         | ENSG00000254805 | 205   | -0.86572 | 0.000321 | 0.009043 |
| RN7SL141P        | ENSG00000243398 | 266   | -0.84761 | 6.99E-06 | 0.001124 |
| RPL17P44         | ENSG00000241088 | 550   | -0.83795 | 0.000317 | 0.008988 |
| CTGLF12P         | ENSG00000265018 | 2400  | -0.83588 | 3.6E-05  | 0.002905 |
| RP11-7K24.3      | ENSG00000261068 | 2027  | -0.82211 | 5.13E-06 | 0.000947 |
| bP-2171C21.6     | ENSG00000279720 | 501   | -0.81742 | 0.005851 | 0.049804 |
| MUC3A            | ENSG00000169894 | 11374 | -0.81136 | 7.32E-05 | 0.004222 |
| HSPB7            | ENSG00000173641 | 3910  | -0.79779 | 0.002543 | 0.029915 |
| SLC34A2          | ENSG00000157765 | 4699  | -0.79661 | 0.000298 | 0.008696 |
| RN7SL105P        | ENSG00000243704 | 299   | -0.78951 | 0.000338 | 0.009337 |
| RP11-139E19.3    | ENSG00000278351 | 254   | -0.77869 | 3.25E-05 | 0.00276  |
| RP11-64K12.10    | ENSG00000261374 | 1594  | -0.77345 | 0.000533 | 0.01207  |
| RP11-443P15.2    | ENSG00000171658 | 2628  | -0.76646 | 0.00012  | 0.005334 |
| MIR1199          | ENSG00000277805 | 119   | -0.76192 | 0.000511 | 0.011785 |
| AC009961.5       | ENSG00000227055 | 251   | -0.75968 | 0.000242 | 0.007844 |
| MT-CYB           | ENSG00000198727 | 1141  | -0.75704 | 4.27E-07 | 0.000198 |
| MIR2116          | ENSG00000253030 | 80    | -0.74716 | 5.54E-05 | 0.00368  |
| XXbac-B476C20.14 | ENSG00000235445 | 361   | -0.74634 | 0.000172 | 0.006425 |
| AL354822.1       | ENSG00000278384 | 3027  | -0.74532 | 0.001804 | 0.024323 |
| DISP2            | ENSG00000140323 | 5171  | -0.74391 | 8.81E-06 | 0.001294 |
| RNU4-78P         | ENSG00000222872 | 126   | -0.74295 | 0.000342 | 0.009378 |
| RP11-255M6.1     | ENSG00000271044 | 630   | -0.73955 | 0.00017  | 0.006394 |
| SEMA6C           | ENSG00000143434 | 5809  | -0.73752 | 7.08E-05 | 0.00412  |
| RP11-64K12.4     | ENSG00000259368 | 482   | -0.73541 | 0.000189 | 0.006778 |
| MTND5P11         | ENSG00000248923 | 1812  | -0.73374 | 0.000285 | 0.008537 |

|               |                 |       |          |          |          |
|---------------|-----------------|-------|----------|----------|----------|
| TEKT4P2       | ENSG00000188681 | 2309  | -0.72598 | 0.002885 | 0.032374 |
| NANO6P6       | ENSG00000227351 | 847   | -0.72285 | 0.00016  | 0.006123 |
| VN2R11P       | ENSG00000267447 | 676   | -0.71943 | 0.003254 | 0.034852 |
| AP001623.1    | ENSG00000216197 | 72    | -0.71792 | 0.001472 | 0.021563 |
| MUC12         | ENSG00000205277 | 17130 | -0.71791 | 1.59E-05 | 0.001783 |
| CTAGE9        | ENSG00000236761 | 2334  | -0.71377 | 0.001225 | 0.019341 |
| RP11-268J15.5 | ENSG00000116883 | 1838  | -0.70458 | 1.97E-06 | 0.000529 |
| Y_RNA         | ENSG00000206645 | 102   | -0.70456 | 9.24E-06 | 0.001298 |
| RP4-704D23.1  | ENSG00000234593 | 579   | -0.70349 | 0.001297 | 0.019929 |
| RP11-345P4.6  | ENSG00000269227 | 502   | -0.70287 | 6.25E-07 | 0.000255 |
| AC005753.1    | ENSG00000278925 | 618   | -0.70149 | 0.000983 | 0.016953 |
| RN7SKP25      | ENSG00000199319 | 308   | -0.70093 | 2.89E-05 | 0.002574 |
| UGT1A12P      | ENSG00000228949 | 853   | -0.69963 | 0.00078  | 0.014891 |
| RP11-40E6.1   | ENSG00000275741 | 518   | -0.6985  | 0.000581 | 0.012703 |
| LIN28A        | ENSG00000131914 | 4008  | -0.69528 | 5.13E-06 | 0.000947 |
| RP11-58K22.4  | ENSG00000255092 | 567   | -0.69273 | 5.19E-06 | 0.000947 |
| MT-TD         | ENSG00000210154 | 68    | -0.69024 | 9.31E-05 | 0.004774 |
| SP5           | ENSG00000204335 | 2060  | -0.68897 | 0.001819 | 0.024458 |
| CYP2D7        | ENSG00000205702 | 2260  | -0.68782 | 0.000641 | 0.013406 |
| BBOX1-AS1     | ENSG00000254560 | 1312  | -0.6842  | 0.001713 | 0.023598 |
| RP11-404P21.5 | ENSG00000258412 | 460   | -0.68357 | 0.000218 | 0.007399 |
| RP11-731D1.3  | ENSG00000250350 | 163   | -0.68256 | 1.38E-05 | 0.001625 |
| BMS1P7        | ENSG00000270025 | 1052  | -0.6803  | 1.91E-07 | 0.000119 |
| MIR4668       | ENSG00000266315 | 70    | -0.67696 | 0.00035  | 0.009516 |
| RP11-194N12.2 | ENSG00000267222 | 684   | -0.67365 | 0.002108 | 0.026829 |
| RNA5SP151     | ENSG00000202502 | 117   | -0.67272 | 0.000759 | 0.014594 |
| RP11-131M6.4  | ENSG00000274162 | 511   | -0.67211 | 0.004475 | 0.042391 |
| RP11-138H8.8  | ENSG00000274297 | 588   | -0.67086 | 1.82E-05 | 0.001926 |
| LARGE-IT1     | ENSG00000232081 | 558   | -0.66913 | 0.001183 | 0.018947 |
| RP11-567P19.1 | ENSG00000275927 | 556   | -0.66681 | 4.35E-05 | 0.003181 |
| MTND2P28      | ENSG00000225630 | 1044  | -0.66497 | 0.002521 | 0.029831 |
| RNU4-22P      | ENSG00000222990 | 166   | -0.66484 | 0.000149 | 0.005883 |
| RP11-336K24.5 | ENSG00000224276 | 401   | -0.65921 | 0.000511 | 0.011785 |
| RP11-96C23.11 | ENSG00000261011 | 1740  | -0.65702 | 9.31E-07 | 0.00034  |
| AC245033.1    | ENSG00000221095 | 84    | -0.65673 | 0.000362 | 0.009657 |
| RP11-83B20.6  | ENSG00000279334 | 415   | -0.65171 | 2.21E-05 | 0.002133 |
| Metazoa_SRP   | ENSG00000277396 | 262   | -0.65168 | 5.46E-07 | 0.000231 |
| RP11-104L21.3 | ENSG00000273160 | 303   | -0.64858 | 0.001518 | 0.021908 |
| RP4-669P10.19 | ENSG00000227370 | 456   | -0.64743 | 0.000593 | 0.012846 |
| AC092117.2    | ENSG00000265864 | 78    | -0.64507 | 4.4E-06  | 0.000852 |
| AGAP10        | ENSG00000204172 | 2848  | -0.64499 | 1.71E-05 | 0.001862 |

|               |                 |      |          |          |          |
|---------------|-----------------|------|----------|----------|----------|
| CTAGE4        | ENSG00000225932 | 2588 | -0.64215 | 0.003863 | 0.038717 |
| RP11-395B7.2  | ENSG00000274993 | 2555 | -0.64192 | 0.000953 | 0.016723 |
| ACTBP9        | ENSG00000266920 | 1099 | -0.64178 | 0.003238 | 0.034763 |
| RNU1-134P     | ENSG00000199805 | 165  | -0.64025 | 0.00062  | 0.013137 |
| CTSLP7        | ENSG00000266217 | 394  | -0.636   | 0.00216  | 0.027203 |
| CTD-2215L10.1 | ENSG00000250619 | 805  | -0.63545 | 0.00138  | 0.020627 |
| RP11-345P4.7  | ENSG00000269737 | 1422 | -0.63515 | 1.42E-05 | 0.001653 |
| CERS1         | ENSG00000223802 | 3753 | -0.63129 | 0.000241 | 0.007839 |
| AL445183.1    | ENSG00000279054 | 48   | -0.63085 | 0.001155 | 0.018751 |
| AC010525.4    | ENSG00000267117 | 441  | -0.63037 | 0.001159 | 0.018793 |
| RP11-138H8.2  | ENSG00000259532 | 472  | -0.62993 | 5.51E-05 | 0.00368  |
| RP4-687K1.2   | ENSG00000259109 | 242  | -0.6279  | 0.000157 | 0.006092 |
| RP11-321A17.4 | ENSG00000263709 | 323  | -0.62581 | 2.57E-05 | 0.002377 |
| RHD           | ENSG00000187010 | 3313 | -0.62547 | 0.000623 | 0.013182 |
| CTD-2011F17.2 | ENSG00000255421 | 285  | -0.62514 | 2.17E-05 | 0.002118 |
| ZNF503        | ENSG00000165655 | 3347 | -0.6248  | 4.36E-06 | 0.000851 |
| RP3-395C13.1  | ENSG00000218631 | 616  | -0.62441 | 0.000848 | 0.015519 |
| AGAP11        | ENSG00000271880 | 3078 | -0.62335 | 4.01E-07 | 0.000192 |
| FAM53B-AS1    | ENSG00000233334 | 1760 | -0.62186 | 1.97E-06 | 0.000529 |
| RP11-96C23.14 | ENSG00000272508 | 1238 | -0.62184 | 4.63E-07 | 0.000208 |
| AC026449.1    | ENSG00000280329 | 63   | -0.62113 | 5.5E-05  | 0.00368  |
| RNU6-876P     | ENSG00000212597 | 104  | -0.61973 | 0.000751 | 0.014502 |
| MAB21L3       | ENSG00000173212 | 3256 | -0.61964 | 3.43E-07 | 0.000168 |
| BMS1P2        | ENSG00000251079 | 2153 | -0.61599 | 1.41E-06 | 0.000454 |
| RP11-29B2.6   | ENSG00000276957 | 536  | -0.61321 | 0.004746 | 0.043885 |
| ESRG          | ENSG00000265992 | 3140 | -0.61279 | 1.55E-05 | 0.001752 |
| RP11-69I8.3   | ENSG00000227220 | 495  | -0.61273 | 0.002865 | 0.032315 |
| RP3-405J10.4  | ENSG00000257256 | 325  | -0.6124  | 1.48E-07 | 0.000104 |
| OR2A4         | ENSG00000180658 | 933  | -0.61202 | 0.000566 | 0.012509 |
| RP13-36G14.3  | ENSG00000203397 | 510  | -0.61193 | 0.000477 | 0.011301 |
| RP11-144G6.12 | ENSG00000254929 | 1625 | -0.61135 | 6.82E-06 | 0.001124 |
| BMS1P3        | ENSG00000240089 | 932  | -0.61082 | 2.13E-06 | 0.000545 |
| ZNF503-AS2    | ENSG00000237149 | 3348 | -0.60905 | 5.86E-05 | 0.003767 |
| BMS1P1        | ENSG00000204177 | 4341 | -0.60566 | 6.39E-06 | 0.001092 |
| SNX18P25      | ENSG00000249337 | 758  | -0.6047  | 0.003608 | 0.037219 |
| HMGB1P21      | ENSG00000248909 | 581  | -0.6034  | 1.81E-06 | 0.000504 |
| IRS2          | ENSG00000185950 | 8138 | -0.60261 | 7.31E-06 | 0.001143 |
| AE000658.30   | ENSG00000256350 | 198  | -0.60144 | 0.005598 | 0.048489 |
| MIR6753       | ENSG00000275022 | 164  | -0.60039 | 0.000649 | 0.013494 |
| RP11-91P24.5  | ENSG00000254691 | 551  | -0.59977 | 0.00013  | 0.005521 |
| RP11-8L18.3   | ENSG00000229235 | 243  | -0.59893 | 0.000412 | 0.010356 |

|               |                 |       |          |          |          |
|---------------|-----------------|-------|----------|----------|----------|
| AC108004.3    | ENSG00000241525 | 1223  | -0.59734 | 0.002917 | 0.032577 |
| TRIM36-IT1    | ENSG00000250472 | 881   | -0.59592 | 0.000846 | 0.0155   |
| CHAD          | ENSG00000136457 | 1802  | -0.59515 | 0.000491 | 0.01155  |
| DNAJB3        | ENSG00000227802 | 1266  | -0.59385 | 0.0003   | 0.008696 |
| FO538757.2    | ENSG00000279457 | 1982  | -0.59366 | 1.06E-05 | 0.001398 |
| RN7SKP273     | ENSG00000223324 | 314   | -0.59302 | 0.00032  | 0.009038 |
| ADH4          | ENSG00000198099 | 2453  | -0.59258 | 0.000434 | 0.010653 |
| MIR614        | ENSG00000207817 | 90    | -0.59215 | 0.00385  | 0.03861  |
| PLS1-AS1      | ENSG00000239641 | 346   | -0.59001 | 5.56E-05 | 0.00368  |
| SEMA5A        | ENSG00000112902 | 12097 | -0.58977 | 0.002374 | 0.028731 |
| RP11-543P15.3 | ENSG00000275850 | 2400  | -0.58852 | 0.000649 | 0.013494 |
| RPS12P27      | ENSG00000240435 | 337   | -0.58749 | 2.56E-05 | 0.00237  |
| CTD-2201E9.2  | ENSG00000250001 | 543   | -0.5867  | 0.004658 | 0.043313 |
| HMGB1P8       | ENSG00000259699 | 949   | -0.58599 | 1.09E-05 | 0.001412 |
| PEBP4         | ENSG00000134020 | 1329  | -0.58539 | 0.000429 | 0.010594 |
| RP11-44N21.3  | ENSG00000280244 | 461   | -0.58446 | 0.00202  | 0.026207 |
| RP3-465N24.5  | ENSG00000261349 | 459   | -0.58445 | 0.00387  | 0.038751 |
| MIR941-1      | ENSG00000215946 | 72    | -0.5843  | 0.000952 | 0.016723 |
| RP11-96C23.13 | ENSG00000151303 | 4560  | -0.58412 | 1.9E-07  | 0.000119 |
| CTD-2600O9.1  | ENSG00000187185 | 2114  | -0.58285 | 0.001004 | 0.017189 |
| CTB-36O1.7    | ENSG00000244921 | 747   | -0.58182 | 0.000729 | 0.014283 |
| MIR4296       | ENSG00000264572 | 88    | -0.58177 | 0.000251 | 0.007968 |
| CTD-2104P17.2 | ENSG00000264932 | 563   | -0.58176 | 9.23E-06 | 0.001298 |
| POU5F1        | ENSG00000204531 | 2881  | -0.58161 | 0.000637 | 0.013347 |
| CTA-243E7.1   | ENSG00000279110 | 13120 | -0.58065 | 5.22E-05 | 0.003557 |
| AC091492.2    | ENSG00000225026 | 272   | -0.57964 | 0.000116 | 0.005253 |
| TBCAP2        | ENSG00000235829 | 326   | -0.57953 | 0.001057 | 0.017779 |
| SUMO2P14      | ENSG00000271096 | 293   | -0.57704 | 9.49E-06 | 0.001311 |
| CTD-2036J7.1  | ENSG00000241026 | 483   | -0.57579 | 0.000599 | 0.012867 |
| OR2A7         | ENSG00000243896 | 1116  | -0.5756  | 0.000446 | 0.01086  |
| RP13-726E6.1  | ENSG00000254757 | 450   | -0.57467 | 0.000972 | 0.016885 |
| MIR6124       | ENSG00000275373 | 85    | -0.57407 | 0.000415 | 0.010389 |
| AC008671.1    | ENSG00000222732 | 114   | -0.57397 | 0.00169  | 0.023367 |
| RNU6-960P     | ENSG00000200926 | 120   | -0.57301 | 0.000378 | 0.009926 |
| CTC-461H2.2   | ENSG00000267611 | 187   | -0.57264 | 0.004961 | 0.045081 |
| VWCE          | ENSG00000167992 | 4874  | -0.57191 | 0.001496 | 0.021727 |
| SCN9A         | ENSG00000169432 | 10364 | -0.57176 | 0.003295 | 0.035126 |
| CTB-186G2.4   | ENSG00000267375 | 242   | -0.57071 | 4.26E-05 | 0.003151 |
| PPIAP2        | ENSG00000227379 | 492   | -0.57061 | 0.000107 | 0.005039 |
| SNORA11       | ENSG00000221245 | 127   | -0.57016 | 0.002654 | 0.030787 |
| MTND2P2       | ENSG00000229954 | 945   | -0.56962 | 0.000511 | 0.011785 |

|               |                 |       |          |          |          |
|---------------|-----------------|-------|----------|----------|----------|
| RPL17P11      | ENSG00000233445 | 544   | -0.56922 | 0.000729 | 0.014283 |
| RP11-494K3.2  | ENSG00000229657 | 562   | -0.56911 | 0.001444 | 0.021278 |
| RP11-820K3.3  | ENSG00000203437 | 781   | -0.56767 | 0.000228 | 0.007603 |
| RP11-13N13.5  | ENSG00000264188 | 336   | -0.56763 | 0.00335  | 0.035539 |
| ZNF415P1      | ENSG00000266127 | 1166  | -0.56615 | 0.001191 | 0.019039 |
| RP11-214D15.2 | ENSG00000227175 | 380   | -0.56543 | 7.04E-06 | 0.001126 |
| RP11-295B17.6 | ENSG00000271437 | 538   | -0.56538 | 0.00077  | 0.014749 |
| RP11-429D19.1 | ENSG00000259771 | 448   | -0.56419 | 0.000192 | 0.006838 |
| TEX35         | ENSG00000240021 | 4038  | -0.56413 | 0.000178 | 0.006569 |
| C17orf97      | ENSG00000187624 | 2505  | -0.56294 | 0.005476 | 0.047906 |
| CRHR2         | ENSG00000106113 | 3984  | -0.56246 | 0.000726 | 0.014282 |
| RP11-8P13.1   | ENSG00000244743 | 316   | -0.56233 | 0.000547 | 0.012199 |
| RP11-478C1.7  | ENSG00000251148 | 563   | -0.56    | 0.001417 | 0.021037 |
| CTD-2373H9.5  | ENSG00000267491 | 945   | -0.55687 | 0.000329 | 0.009198 |
| RN7SL749P     | ENSG00000242853 | 290   | -0.55666 | 0.000371 | 0.009816 |
| SLC37A2       | ENSG00000134955 | 6575  | -0.55586 | 0.002302 | 0.028164 |
| RP11-59H7.3   | ENSG00000259732 | 633   | -0.55548 | 0.000268 | 0.00824  |
| CTA-221G9.12  | ENSG00000203280 | 957   | -0.55502 | 0.000186 | 0.006728 |
| AC011243.1    | ENSG00000223430 | 415   | -0.55471 | 0.00463  | 0.043164 |
| AC011288.2    | ENSG00000229618 | 989   | -0.55435 | 0.001943 | 0.025399 |
| RP11-91P24.1  | ENSG00000241782 | 474   | -0.55157 | 0.001894 | 0.025074 |
| RP11-46F15.2  | ENSG00000238260 | 622   | -0.5515  | 0.004782 | 0.044011 |
| RP11-432I5.8  | ENSG00000261513 | 777   | -0.55066 | 0.00052  | 0.011906 |
| UGT1A13P      | ENSG00000234143 | 762   | -0.55023 | 0.000248 | 0.007946 |
| PLEKHN1       | ENSG00000187583 | 2833  | -0.54886 | 0.003067 | 0.033692 |
| RP11-4B16.3   | ENSG00000275178 | 361   | -0.54797 | 0.000164 | 0.006222 |
| RP11-93O14.2  | ENSG00000261131 | 321   | -0.54664 | 0.000297 | 0.008696 |
| RP11-454L9.2  | ENSG00000259318 | 294   | -0.54622 | 2.85E-05 | 0.002559 |
| Vault         | ENSG00000252283 | 102   | -0.54586 | 0.001161 | 0.018805 |
| RP11-230L22.4 | ENSG00000237336 | 722   | -0.54565 | 0.000222 | 0.007437 |
| RP11-750H9.7  | ENSG00000270072 | 430   | -0.54516 | 0.000117 | 0.005271 |
| RNA5SP212     | ENSG00000212525 | 107   | -0.54483 | 0.000378 | 0.009926 |
| TRBV29OR9-2   | ENSG00000223394 | 333   | -0.54414 | 9.49E-06 | 0.001311 |
| RPL21P123     | ENSG00000240531 | 407   | -0.54398 | 0.002527 | 0.029853 |
| RP11-274A11.3 | ENSG00000279294 | 2059  | -0.54396 | 6.31E-05 | 0.003815 |
| MUC17         | ENSG00000169876 | 14579 | -0.54394 | 0.000147 | 0.005854 |
| AC005037.6    | ENSG00000235318 | 298   | -0.5438  | 0.000878 | 0.015873 |
| RP11-384K6.2  | ENSG00000225892 | 2486  | -0.54357 | 1E-04    | 0.004942 |
| Z69890.1      | ENSG00000206168 | 339   | -0.54281 | 0.001156 | 0.018751 |
| MIR5687       | ENSG00000265135 | 77    | -0.54252 | 0.00069  | 0.013872 |
| RP11-356M20.3 | ENSG00000259735 | 497   | -0.54217 | 0.000263 | 0.008179 |

|                |                 |      |          |          |          |
|----------------|-----------------|------|----------|----------|----------|
| HAPLN4         | ENSG00000187664 | 3569 | -0.542   | 0.000389 | 0.010045 |
| GS1-115G20.1   | ENSG00000230470 | 423  | -0.53835 | 0.001143 | 0.018636 |
| MTND1P11       | ENSG00000228166 | 876  | -0.53795 | 0.005123 | 0.046091 |
| MT-TS2         | ENSG00000210184 | 59   | -0.53771 | 0.00059  | 0.012791 |
| CTD-2639E6.9   | ENSG00000267898 | 946  | -0.53725 | 0.002213 | 0.027613 |
| FGF18          | ENSG00000156427 | 1986 | -0.53665 | 0.000382 | 0.009964 |
| RPL7AP15       | ENSG00000236806 | 795  | -0.53626 | 0.00021  | 0.007234 |
| RNU6-212P      | ENSG00000199512 | 104  | -0.53608 | 0.003436 | 0.036161 |
| RP3-405J10.2   | ENSG00000257531 | 354  | -0.5358  | 4.72E-05 | 0.00335  |
| CTA-243E7.3    | ENSG00000279548 | 2059 | -0.53553 | 0.000357 | 0.0096   |
| RP11-640L9.1   | ENSG00000279727 | 1344 | -0.53527 | 0.000302 | 0.008715 |
| RP11-875O11.2  | ENSG00000246130 | 2636 | -0.53521 | 0.000297 | 0.008696 |
| MTND5P14       | ENSG00000230225 | 1267 | -0.53493 | 0.00025  | 0.007959 |
| CTD-2024P10.1  | ENSG00000250234 | 407  | -0.53364 | 0.000346 | 0.009458 |
| AC009095.4     | ENSG00000237718 | 522  | -0.5334  | 0.002229 | 0.027667 |
| SLC35E1P1      | ENSG00000238286 | 864  | -0.53339 | 0.00011  | 0.005099 |
| RP11-146N23.4  | ENSG00000232978 | 409  | -0.53317 | 2.9E-05  | 0.002574 |
| MAPK15         | ENSG00000181085 | 3056 | -0.53212 | 0.001581 | 0.022448 |
| LINC01555      | ENSG00000180869 | 2884 | -0.53199 | 0.000929 | 0.016496 |
| RP11-420B22.1  | ENSG00000253335 | 545  | -0.53192 | 0.000622 | 0.013167 |
| KCTD9P4        | ENSG00000214264 | 1166 | -0.53139 | 0.001306 | 0.020039 |
| RP11-95G17.2   | ENSG00000272472 | 1384 | -0.53123 | 0.000828 | 0.015324 |
| AC116533.3     | ENSG00000266493 | 91   | -0.52957 | 0.000467 | 0.011143 |
| AC011816.1     | ENSG00000234073 | 546  | -0.52864 | 0.000631 | 0.01327  |
| RP11-274A11.5  | ENSG00000279681 | 506  | -0.52856 | 0.002394 | 0.028847 |
| SMG6-IT1       | ENSG00000278941 | 374  | -0.52499 | 0.000519 | 0.011906 |
| RP11-400F19.18 | ENSG00000267632 | 1736 | -0.52405 | 5.28E-05 | 0.003583 |
| RP11-343B5.1   | ENSG00000233597 | 576  | -0.5238  | 0.000144 | 0.0058   |
| AP000487.4     | ENSG00000254495 | 394  | -0.52377 | 0.000706 | 0.014023 |
| GLTSCR1        | ENSG00000063169 | 7507 | -0.52337 | 1.17E-05 | 0.001472 |
| KB-1205A7.1    | ENSG00000254112 | 319  | -0.52309 | 0.00018  | 0.006608 |
| ANKRD24        | ENSG00000089847 | 4474 | -0.52166 | 9.98E-06 | 0.001358 |
| RP11-680F8.4   | ENSG00000259644 | 1346 | -0.52072 | 3.24E-07 | 0.000161 |
| CTC-507E2.2    | ENSG00000267592 | 225  | -0.51953 | 0.001578 | 0.022412 |
| SLC30A10       | ENSG00000196660 | 5770 | -0.51929 | 0.000407 | 0.010313 |
| AL109767.1     | ENSG00000235785 | 564  | -0.51908 | 0.00025  | 0.007959 |
| AC010525.5     | ENSG00000267689 | 195  | -0.51905 | 0.000733 | 0.014328 |
| CYP2S1         | ENSG00000167600 | 2874 | -0.519   | 0.000341 | 0.009378 |
| RP11-1102P22.3 | ENSG00000279410 | 1370 | -0.5187  | 4.68E-05 | 0.003332 |
| HSPA8P5        | ENSG00000256356 | 2069 | -0.518   | 0.000691 | 0.013877 |
| RP11-284F21.9  | ENSG00000272068 | 3222 | -0.51754 | 7.35E-05 | 0.004224 |

|                  |                 |       |          |          |          |
|------------------|-----------------|-------|----------|----------|----------|
| RGS11            | ENSG00000076344 | 4798  | -0.5173  | 0.001238 | 0.019429 |
| MIR4665          | ENSG00000263575 | 79    | -0.51691 | 0.000719 | 0.014196 |
| RP5-1071N3.1     | ENSG00000231105 | 2479  | -0.51663 | 5.89E-05 | 0.003778 |
| CTA-243E7.2      | ENSG00000279006 | 3000  | -0.51641 | 4.82E-05 | 0.003409 |
| RP11-351O1.3     | ENSG00000224412 | 178   | -0.51574 | 0.005007 | 0.045356 |
| XXbac-B476C20.13 | ENSG00000234913 | 2493  | -0.51538 | 0.001749 | 0.023914 |
| AC010203.1       | ENSG00000221770 | 83    | -0.51514 | 0.000702 | 0.013974 |
| RP11-430B1.1     | ENSG00000259398 | 381   | -0.51455 | 0.004396 | 0.041985 |
| RPS20P15         | ENSG00000227523 | 311   | -0.51438 | 0.00182  | 0.024465 |
| NSRP1P1          | ENSG00000235613 | 1693  | -0.51387 | 0.002605 | 0.030415 |
| RP11-519G16.3    | ENSG00000259354 | 3886  | -0.51334 | 6.66E-05 | 0.003993 |
| FKSG52           | ENSG00000280447 | 375   | -0.51303 | 0.000103 | 0.004987 |
| RP11-290H9.4     | ENSG00000263293 | 713   | -0.51165 | 0.00153  | 0.022014 |
| NR4A3            | ENSG00000119508 | 6314  | -0.51119 | 0.003654 | 0.037526 |
| IQSEC3           | ENSG00000120645 | 7686  | -0.51107 | 0.005657 | 0.048806 |
| RP11-618N24.1    | ENSG00000261635 | 725   | -0.5098  | 3.59E-05 | 0.002905 |
| SLC43A2          | ENSG00000167703 | 10606 | -0.50945 | 0.001124 | 0.018464 |
| RP4-718P11.1     | ENSG00000271426 | 646   | -0.50928 | 0.003501 | 0.03665  |
| RP11-792A8.1     | ENSG00000236928 | 521   | -0.50849 | 0.001236 | 0.019421 |
| RP11-1228E12.1   | ENSG00000280279 | 2096  | -0.50731 | 0.000283 | 0.008487 |
| RP11-214N15.5    | ENSG00000234017 | 241   | -0.50617 | 8.32E-05 | 0.004484 |
| MTND2P11         | ENSG00000237124 | 648   | -0.50515 | 0.003879 | 0.038789 |
| RP11-79M19.2     | ENSG00000236426 | 761   | -0.50496 | 0.000408 | 0.010313 |
| RP11-332H18.3    | ENSG00000266934 | 1329  | -0.50493 | 0.001767 | 0.024008 |
| RP11-459I19.1    | ENSG00000272555 | 455   | -0.50491 | 0.000936 | 0.016547 |
| RP11-68I18.10    | ENSG00000261168 | 1536  | -0.50463 | 0.005313 | 0.047152 |
| RP1-122P22.4     | ENSG00000268628 | 1648  | -0.50444 | 0.000601 | 0.012882 |
| RP11-820K3.2     | ENSG00000225349 | 533   | -0.50347 | 0.000238 | 0.007776 |
| AC093162.5       | ENSG00000246575 | 704   | -0.50307 | 0.000255 | 0.008025 |
| RP11-9F11.3      | ENSG00000279241 | 583   | -0.50272 | 0.000109 | 0.00508  |
| ENO1P3           | ENSG00000243986 | 1224  | -0.50261 | 0.002903 | 0.032472 |
| RP11-667M19.9    | ENSG00000255710 | 1030  | -0.50184 | 0.000453 | 0.010972 |
| RP11-93O14.3     | ENSG00000280376 | 485   | -0.50173 | 0.001333 | 0.020271 |
| GRB7             | ENSG00000141738 | 3597  | -0.5015  | 0.000299 | 0.008696 |
| RP11-730A19.5    | ENSG00000228330 | 793   | -0.50095 | 0.0023   | 0.028154 |
| RP11-10J21.4     | ENSG00000253307 | 397   | -0.4996  | 0.004072 | 0.040034 |
| UPF3AP3          | ENSG00000234709 | 769   | -0.49945 | 2.36E-07 | 0.000134 |
| LINC01358        | ENSG00000230812 | 747   | -0.49928 | 0.005244 | 0.046852 |
| CTD-2373H9.3     | ENSG00000279339 | 2889  | -0.49829 | 0.000796 | 0.015076 |
| RNU6-125P        | ENSG00000207234 | 107   | -0.49802 | 0.001289 | 0.01987  |
| TLX2             | ENSG00000115297 | 2775  | -0.49694 | 0.000668 | 0.013662 |



|                  |                 |       |          |          |          |
|------------------|-----------------|-------|----------|----------|----------|
| RP11-539G18.1    | ENSG00000249019 | 287   | -0.49691 | 0.000668 | 0.013662 |
| RPS12P26         | ENSG00000225193 | 396   | -0.49623 | 0.00083  | 0.015324 |
| RP11-417L19.5    | ENSG00000279283 | 1740  | -0.49615 | 9.29E-05 | 0.004774 |
| MT-TH            | ENSG00000210176 | 69    | -0.49576 | 0.001103 | 0.018281 |
| SNORA67          | ENSG00000201619 | 141   | -0.49567 | 0.00342  | 0.036088 |
| RP11-434D2.3     | ENSG00000267075 | 4582  | -0.49537 | 0.003041 | 0.033543 |
| RP11-1102P22.1   | ENSG00000279415 | 978   | -0.49496 | 0.000782 | 0.014919 |
| RP11-353H3.1     | ENSG00000223916 | 515   | -0.49471 | 0.004444 | 0.042221 |
| GATM-AS1         | ENSG00000275672 | 1424  | -0.49447 | 0.005712 | 0.049092 |
| SHOX             | ENSG00000185960 | 4384  | -0.49428 | 0.005797 | 0.0495   |
| FGF5             | ENSG00000138675 | 5998  | -0.49369 | 0.000609 | 0.012984 |
| ERP29P1          | ENSG00000233347 | 706   | -0.49354 | 0.00423  | 0.041038 |
| AC114812.9       | ENSG00000248114 | 730   | -0.49304 | 0.002646 | 0.030718 |
| CTB-151G24.1     | ENSG00000267696 | 595   | -0.49236 | 0.000927 | 0.016478 |
| XXbac-B476C20.11 | ENSG00000236890 | 210   | -0.49207 | 0.001654 | 0.023098 |
| RN7SL329P        | ENSG00000242170 | 299   | -0.49155 | 0.003172 | 0.034388 |
| RP11-439C15.5    | ENSG00000270988 | 497   | -0.49151 | 0.000134 | 0.005613 |
| L3MBTL4-AS1      | ENSG00000264707 | 2044  | -0.48971 | 0.000142 | 0.005755 |
| RN7SKP22         | ENSG00000201967 | 293   | -0.48936 | 0.005766 | 0.049322 |
| MIR1914          | ENSG00000272045 | 80    | -0.48934 | 0.005098 | 0.045939 |
| RP5-1022P6.3     | ENSG00000233578 | 642   | -0.48847 | 4.4E-05  | 0.003193 |
| MIR4802          | ENSG00000263642 | 80    | -0.48833 | 0.000819 | 0.015231 |
| CTD-2515A14.1    | ENSG00000261669 | 579   | -0.48818 | 4.3E-05  | 0.003163 |
| YWHAQP6          | ENSG00000249986 | 304   | -0.48818 | 0.00144  | 0.021273 |
| RNF144A-AS1      | ENSG00000228203 | 4648  | -0.488   | 0.000103 | 0.004987 |
| HMGNI1P20        | ENSG00000239539 | 300   | -0.48773 | 0.000448 | 0.010901 |
| CTD-2611O12.6    | ENSG00000268593 | 306   | -0.48744 | 0.001168 | 0.01884  |
| XXbac-B476C20.10 | ENSG00000235617 | 277   | -0.48702 | 0.005376 | 0.047464 |
| RP11-435O5.6     | ENSG00000271314 | 456   | -0.48661 | 0.002902 | 0.032472 |
| MT-ND3           | ENSG00000198840 | 346   | -0.48573 | 0.000122 | 0.005357 |
| RP11-458F8.4     | ENSG00000273142 | 3441  | -0.48571 | 0.003315 | 0.035295 |
| RP11-512F24.1    | ENSG00000232499 | 1029  | -0.48546 | 0.000238 | 0.007776 |
| DRD4             | ENSG00000069696 | 1477  | -0.48545 | 0.000521 | 0.011926 |
| LRP1             | ENSG00000123384 | 20839 | -0.48511 | 6.18E-05 | 0.003815 |
| FP325331.1       | ENSG00000278881 | 1380  | -0.48481 | 0.0006   | 0.012881 |
| AP000679.2       | ENSG00000176984 | 2081  | -0.48459 | 0.001882 | 0.024963 |
| RPL21P44         | ENSG00000229585 | 472   | -0.48394 | 0.000253 | 0.008002 |
| RP11-104L21.2    | ENSG00000233411 | 303   | -0.48266 | 0.002116 | 0.026871 |
| RP11-274B21.2    | ENSG00000243302 | 1150  | -0.48211 | 6.42E-05 | 0.003869 |
| SLC22A20         | ENSG00000197847 | 3983  | -0.48111 | 0.00012  | 0.005334 |
| RP11-291L19.1    | ENSG00000236872 | 325   | -0.48079 | 0.003841 | 0.038553 |

|               |                 |       |          |          |          |
|---------------|-----------------|-------|----------|----------|----------|
| RN7SKP154     | ENSG00000222068 | 290   | -0.4804  | 0.005605 | 0.048489 |
| RP11-320P11.1 | ENSG00000203647 | 431   | -0.48007 | 0.00029  | 0.008607 |
| RP4-631H13.6  | ENSG00000230953 | 175   | -0.47988 | 4.33E-05 | 0.003171 |
| NPIP          | ENSG00000169203 | 4331  | -0.4796  | 0.002274 | 0.02792  |
| RP11-803D5.1  | ENSG00000279191 | 3380  | -0.479   | 0.001204 | 0.019123 |
| RP11-235E17.3 | ENSG00000263338 | 560   | -0.47744 | 0.002399 | 0.028867 |
| FMR1-IT1      | ENSG00000236337 | 343   | -0.47739 | 0.001274 | 0.019704 |
| USP6          | ENSG00000129204 | 11270 | -0.47673 | 0.004602 | 0.042944 |
| RP11-1J11.1   | ENSG00000249170 | 978   | -0.47645 | 0.000568 | 0.012524 |
| NPIP3         | ENSG00000169246 | 4717  | -0.47625 | 0.004826 | 0.044248 |
| AC114812.5    | ENSG00000178836 | 1041  | -0.47575 | 0.00253  | 0.029855 |
| RAI14         | ENSG00000039560 | 7687  | -0.47468 | 1.09E-05 | 0.001412 |
| GS1-124K5.13  | ENSG00000279785 | 1194  | -0.47375 | 0.002552 | 0.029982 |
| RP11-466A19.1 | ENSG00000266718 | 2480  | -0.47303 | 0.00057  | 0.012549 |
| MT-TL2        | ENSG00000210191 | 71    | -0.47299 | 0.002166 | 0.027253 |
| RP11-627G23.1 | ENSG00000255545 | 8255  | -0.47251 | 0.00155  | 0.022148 |
| RP11-139K1.2  | ENSG00000227560 | 390   | -0.47233 | 0.000524 | 0.011967 |
| CYP4F3        | ENSG00000186529 | 5860  | -0.47192 | 0.00143  | 0.021175 |
| LDHAL6B       | ENSG00000171989 | 1693  | -0.47141 | 0.000444 | 0.010822 |
| RP11-454K7.1  | ENSG00000257900 | 548   | -0.47093 | 1.71E-05 | 0.001862 |
| AC012513.4    | ENSG00000236478 | 1137  | -0.47053 | 0.000142 | 0.005755 |
| RSF1-IT2      | ENSG00000254985 | 566   | -0.47035 | 0.000329 | 0.009198 |
| RP11-504I13.3 | ENSG00000263982 | 398   | -0.47034 | 0.005851 | 0.049804 |
| RP11-391L3.5  | ENSG00000260229 | 497   | -0.46969 | 0.000334 | 0.009281 |
| RP11-507J18.5 | ENSG00000279665 | 575   | -0.46906 | 0.000264 | 0.008179 |
| BCL9L         | ENSG00000186174 | 10470 | -0.46869 | 5.98E-05 | 0.003801 |
| RP11-6N17.3   | ENSG00000266601 | 335   | -0.46839 | 0.000797 | 0.015084 |
| PCDH11Y       | ENSG00000099715 | 11672 | -0.46805 | 0.000395 | 0.010139 |
| RNU7-18P      | ENSG00000252174 | 62    | -0.46759 | 0.003431 | 0.036144 |
| CTD-3195I5.3  | ENSG00000262692 | 291   | -0.46695 | 0.001627 | 0.022832 |
| RP11-57A1.1   | ENSG00000263680 | 833   | -0.4668  | 0.002846 | 0.032169 |
| KLF3-AS1      | ENSG00000231160 | 4830  | -0.46602 | 1.54E-08 | 1.91E-05 |
| Z85986.1      | ENSG00000264878 | 82    | -0.46594 | 0.00509  | 0.045918 |
| RP11-583F2.5  | ENSG00000266598 | 537   | -0.4659  | 8.14E-05 | 0.004448 |
| AC010999.1    | ENSG00000222586 | 73    | -0.4655  | 0.001135 | 0.018531 |
| RP11-102M11.1 | ENSG00000240695 | 730   | -0.4653  | 8.06E-05 | 0.004442 |
| KB-1958F4.1   | ENSG00000270077 | 554   | -0.46516 | 0.004714 | 0.043661 |
| TPM3P6        | ENSG00000250731 | 742   | -0.46487 | 0.000878 | 0.015873 |
| CHMP4BP1      | ENSG00000258469 | 588   | -0.4646  | 0.000132 | 0.005569 |
| RCN3          | ENSG00000142552 | 2093  | -0.46432 | 0.000497 | 0.011616 |
| CDC42-IT1     | ENSG00000230068 | 692   | -0.46429 | 0.000528 | 0.012001 |

|                |                 |       |          |          |          |
|----------------|-----------------|-------|----------|----------|----------|
| RP11-314N13.9  | ENSG00000280162 | 3658  | -0.46403 | 0.000404 | 0.010275 |
| RPL19P12       | ENSG00000224415 | 591   | -0.464   | 3.8E-05  | 0.002962 |
| HMGNI1P2       | ENSG00000229046 | 310   | -0.46278 | 0.001612 | 0.022761 |
| AC016910.1     | ENSG00000232377 | 1046  | -0.46255 | 0.002063 | 0.026538 |
| RP11-110I1.11  | ENSG00000254428 | 523   | -0.46244 | 7.92E-06 | 0.001189 |
| RP6-99M1.3     | ENSG00000269902 | 528   | -0.4622  | 0.001239 | 0.019429 |
| CTC-499B15.6   | ENSG00000266922 | 491   | -0.46211 | 0.003797 | 0.038332 |
| USP2           | ENSG00000036672 | 4538  | -0.46166 | 0.000106 | 0.005029 |
| RP11-193H22.2  | ENSG00000219448 | 5191  | -0.46071 | 0.000412 | 0.010356 |
| RP11-141B14.2  | ENSG00000279957 | 1173  | -0.46057 | 0.000111 | 0.00512  |
| RP11-1348G14.8 | ENSG00000275807 | 1539  | -0.46057 | 6.76E-05 | 0.004015 |
| RP11-13N13.6   | ENSG00000265656 | 447   | -0.46043 | 0.001613 | 0.022761 |
| AC008985.1     | ENSG00000278999 | 2239  | -0.46025 | 0.001789 | 0.024188 |
| BTF3L4P1       | ENSG00000232260 | 468   | -0.46011 | 0.002159 | 0.027203 |
| PDX1           | ENSG00000139515 | 2501  | -0.45985 | 0.000375 | 0.009902 |
| RP11-296A18.6  | ENSG00000236434 | 435   | -0.45972 | 0.004286 | 0.041335 |
| FKSG70         | ENSG00000279849 | 375   | -0.45949 | 1.24E-06 | 0.000419 |
| HIF1A-AS2      | ENSG00000258667 | 533   | -0.45934 | 0.002529 | 0.029855 |
| FKSG51         | ENSG00000280230 | 375   | -0.45917 | 2.6E-07  | 0.000139 |
| RP11-100G15.3  | ENSG00000228069 | 779   | -0.45914 | 0.000124 | 0.005421 |
| AC094019.4     | ENSG00000236732 | 472   | -0.45832 | 0.000747 | 0.014464 |
| RP11-62H7.2    | ENSG00000233609 | 1442  | -0.45761 | 0.000665 | 0.013659 |
| RP4-695O20.1   | ENSG00000280384 | 2045  | -0.45705 | 4.85E-05 | 0.00341  |
| EFHD1          | ENSG00000115468 | 3052  | -0.45694 | 0.005539 | 0.048173 |
| CTC-425O23.2   | ENSG00000205041 | 1462  | -0.45691 | 0.000298 | 0.008696 |
| RP11-855A2.3   | ENSG00000266717 | 709   | -0.45658 | 0.00089  | 0.016015 |
| RP11-1250I15.1 | ENSG00000279995 | 224   | -0.45654 | 0.002236 | 0.027677 |
| RP11-21L23.2   | ENSG00000261578 | 4192  | -0.45614 | 0.005296 | 0.047087 |
| RP3-395M20.7   | ENSG00000225931 | 1297  | -0.45575 | 0.00026  | 0.008111 |
| PLEC           | ENSG00000178209 | 16991 | -0.45562 | 0.001121 | 0.018442 |
| RPL23AP64      | ENSG00000240970 | 435   | -0.45555 | 7.1E-06  | 0.001129 |
| CAMK2A         | ENSG00000070808 | 6150  | -0.45555 | 0.003725 | 0.037892 |
| SMIM5          | ENSG00000204323 | 5117  | -0.45548 | 0.00477  | 0.043956 |
| RP11-78F17.1   | ENSG00000263551 | 1356  | -0.45529 | 0.000273 | 0.00834  |
| RP11-354E23.4  | ENSG00000279502 | 619   | -0.45503 | 0.000176 | 0.006546 |
| TDGF1P1        | ENSG00000227988 | 527   | -0.45393 | 0.005435 | 0.047734 |
| RP11-181G12.2  | ENSG00000182873 | 1734  | -0.45324 | 0.004006 | 0.039655 |
| IRS1           | ENSG00000169047 | 9953  | -0.45291 | 6.23E-05 | 0.003815 |
| XPNPEP2        | ENSG00000122121 | 3500  | -0.45282 | 0.000882 | 0.015928 |
| RP11-339B21.13 | ENSG00000272696 | 573   | -0.45232 | 0.000122 | 0.005346 |
| RN7SL220P      | ENSG00000266467 | 300   | -0.45197 | 0.001657 | 0.023119 |

|                |                 |      |          |          |          |
|----------------|-----------------|------|----------|----------|----------|
| GAPDHP51       | ENSG00000236973 | 1000 | -0.45163 | 0.002889 | 0.032374 |
| RP11-286N3.2   | ENSG00000264000 | 456  | -0.45147 | 0.001174 | 0.018886 |
| AC092755.4     | ENSG00000227161 | 97   | -0.45131 | 0.004767 | 0.043956 |
| CTD-2283N19.1  | ENSG00000251330 | 514  | -0.45093 | 0.00113  | 0.018506 |
| AC132812.1     | ENSG00000274483 | 101  | -0.45053 | 0.000224 | 0.007494 |
| RP11-284F21.10 | ENSG00000272405 | 3222 | -0.45027 | 2.82E-06 | 0.000664 |
| CTA-797E19.1   | ENSG00000254484 | 422  | -0.45014 | 0.004368 | 0.041746 |
| RP13-128O4.3   | ENSG00000250995 | 1062 | -0.44991 | 0.000182 | 0.006639 |
| CTA-228A9.3    | ENSG00000272720 | 1433 | -0.4499  | 0.000182 | 0.006639 |
| RP1-253P7.4    | ENSG00000197815 | 1815 | -0.44986 | 9.71E-05 | 0.004879 |
| NCKAP5-IT1     | ENSG00000232474 | 554  | -0.44919 | 0.005637 | 0.048698 |
| LNK1-AS1       | ENSG00000250930 | 1381 | -0.44859 | 0.000901 | 0.016151 |
| AC016909.1     | ENSG00000233729 | 1711 | -0.44831 | 0.002745 | 0.031391 |
| TDGF1P6        | ENSG00000241438 | 448  | -0.44829 | 0.003726 | 0.037892 |
| RP11-230B22.1  | ENSG00000235545 | 1228 | -0.44751 | 0.001728 | 0.023706 |
| ALS2CL         | ENSG00000178038 | 9057 | -0.44724 | 0.00293  | 0.03267  |
| LINC01001      | ENSG00000230724 | 3823 | -0.447   | 0.000514 | 0.011831 |
| RP11-19G24.1   | ENSG00000274308 | 814  | -0.44699 | 0.004463 | 0.042328 |
| SNORA76        | ENSG00000252904 | 137  | -0.44661 | 0.002044 | 0.026409 |
| CTD-2017D11.2  | ENSG00000279425 | 2189 | -0.44656 | 0.000774 | 0.014787 |
| RP11-391H12.8  | ENSG00000276434 | 509  | -0.44646 | 0.001275 | 0.019712 |
| MTND2P16       | ENSG00000230818 | 799  | -0.44639 | 0.004752 | 0.043908 |
| CTA-305I2.1    | ENSG00000261535 | 801  | -0.44635 | 0.001504 | 0.021793 |
| RP11-82O19.1   | ENSG00000263657 | 576  | -0.44603 | 0.000122 | 0.005346 |
| RP11-360N9.3   | ENSG00000279361 | 1200 | -0.44583 | 0.001817 | 0.024449 |
| RP11-350G8.5   | ENSG00000228013 | 1756 | -0.44582 | 0.00512  | 0.046083 |
| RP11-533K9.4   | ENSG00000278486 | 643  | -0.44562 | 0.005379 | 0.04747  |
| PER1           | ENSG00000179094 | 7002 | -0.44556 | 0.00496  | 0.045081 |
| RP11-575M22.1  | ENSG00000279512 | 2049 | -0.4452  | 0.005358 | 0.047356 |
| MIR4523        | ENSG00000263719 | 69   | -0.44487 | 0.002089 | 0.026712 |
| RPS2P41        | ENSG00000244060 | 603  | -0.44469 | 0.003233 | 0.034723 |
| RN7SKP54       | ENSG00000222636 | 269  | -0.44466 | 0.000753 | 0.014543 |
| AC002128.5     | ENSG00000271366 | 618  | -0.44455 | 3.69E-06 | 0.000781 |
| RP11-274B21.4  | ENSG00000230715 | 403  | -0.44421 | 0.000518 | 0.011906 |
| RP11-274A11.4  | ENSG00000279841 | 1846 | -0.44379 | 0.000206 | 0.007163 |
| RP11-259F16.3  | ENSG00000233163 | 377  | -0.44376 | 0.002831 | 0.032079 |
| AC073326.3     | ENSG00000228540 | 557  | -0.44331 | 0.001121 | 0.018442 |
| CTD-2288F12.1  | ENSG00000260352 | 463  | -0.44302 | 0.002223 | 0.027667 |
| CTB-129O4.1    | ENSG00000248367 | 393  | -0.44243 | 0.005668 | 0.048872 |
| NEAT1_3        | ENSG00000277599 | 159  | -0.44239 | 0.00036  | 0.009633 |
| SPDYE5         | ENSG00000170092 | 3325 | -0.44225 | 0.000807 | 0.015185 |

|                |                 |       |          |          |          |
|----------------|-----------------|-------|----------|----------|----------|
| ILF2P1         | ENSG00000244226 | 1168  | -0.44187 | 0.000454 | 0.010981 |
| DOHH           | ENSG00000129932 | 2387  | -0.44147 | 0.001323 | 0.020206 |
| RN7SL57P       | ENSG00000242256 | 290   | -0.44142 | 0.002451 | 0.029245 |
| GS1-115G20.2   | ENSG00000232036 | 1325  | -0.44089 | 0.003254 | 0.034852 |
| CTC-435M10.12  | ENSG00000277744 | 449   | -0.44056 | 0.002878 | 0.032351 |
| NEAT1          | ENSG00000245532 | 22767 | -0.44053 | 0.002191 | 0.027418 |
| RP1-128O3.5    | ENSG00000233511 | 187   | -0.44051 | 0.001955 | 0.025466 |
| RP11-504I13.2  | ENSG00000280205 | 3765  | -0.44032 | 0.001324 | 0.020206 |
| RP11-159F24.6  | ENSG00000248554 | 572   | -0.43997 | 0.001412 | 0.021006 |
| CTC-786C10.1   | ENSG00000262601 | 777   | -0.43989 | 0.002608 | 0.030428 |
| AL049794.1     | ENSG00000280240 | 1864  | -0.43955 | 0.00225  | 0.02778  |
| TBX3           | ENSG00000135111 | 5950  | -0.4392  | 0.000819 | 0.015231 |
| AC114730.8     | ENSG00000215692 | 472   | -0.43898 | 0.005678 | 0.048919 |
| RP11-452H21.2  | ENSG00000254649 | 365   | -0.43855 | 0.002366 | 0.028681 |
| CTD-2262B20.1  | ENSG00000259630 | 406   | -0.43746 | 0.000187 | 0.006737 |
| TDRD12         | ENSG00000173809 | 7011  | -0.43745 | 0.003391 | 0.035884 |
| RP11-354E23.3  | ENSG00000280166 | 619   | -0.43683 | 0.000771 | 0.014757 |
| LRRN4          | ENSG00000125872 | 2692  | -0.43679 | 0.003881 | 0.038794 |
| FKBP1AP2       | ENSG00000259691 | 283   | -0.43615 | 0.003056 | 0.033645 |
| TNRC18         | ENSG00000182095 | 12572 | -0.43585 | 3.11E-05 | 0.002705 |
| RP11-336K24.12 | ENSG00000273002 | 2157  | -0.4356  | 0.00039  | 0.010071 |
| RP11-84D1.1    | ENSG00000229162 | 820   | -0.43473 | 0.000539 | 0.012135 |
| RP11-757C15.4  | ENSG00000255296 | 560   | -0.43358 | 0.005485 | 0.047931 |
| RP4-678D15.1   | ENSG00000271774 | 724   | -0.43343 | 0.005134 | 0.046148 |
| RP11-552C15.1  | ENSG00000260601 | 520   | -0.43292 | 0.003269 | 0.034935 |
| AL590762.11    | ENSG00000213018 | 432   | -0.43242 | 0.002524 | 0.029834 |
| RP11-503N18.5  | ENSG00000251229 | 900   | -0.43228 | 0.00081  | 0.015195 |
| RP4-752I6.1    | ENSG00000241169 | 428   | -0.43223 | 0.000611 | 0.013009 |
| Z84812.4       | ENSG00000260803 | 773   | -0.4321  | 0.000608 | 0.01298  |
| MIR6838        | ENSG00000277792 | 56    | -0.43167 | 0.001938 | 0.025399 |
| RN7SL23P       | ENSG00000240823 | 275   | -0.43121 | 0.002905 | 0.032472 |
| CXCR5          | ENSG00000160683 | 4431  | -0.4312  | 8.29E-05 | 0.004484 |
| LINC00598      | ENSG00000215483 | 2489  | -0.4311  | 0.000658 | 0.013581 |
| RP11-525G13.2  | ENSG00000236364 | 675   | -0.43062 | 0.000441 | 0.01077  |
| RP11-1102P22.2 | ENSG00000279620 | 1722  | -0.43056 | 0.002143 | 0.027085 |
| MIDN           | ENSG00000167470 | 4492  | -0.43044 | 3.77E-05 | 0.002954 |
| RP11-98L12.2   | ENSG00000258578 | 465   | -0.43006 | 0.005291 | 0.047073 |
| RP1-59D14.1    | ENSG00000262456 | 1065  | -0.42997 | 3.24E-05 | 0.00276  |
| RP11-332O19.2  | ENSG00000237827 | 400   | -0.42996 | 0.001326 | 0.020227 |
| SPACA4         | ENSG00000177202 | 972   | -0.42989 | 0.0037   | 0.037765 |
| RP11-689C9.1   | ENSG00000272461 | 657   | -0.42972 | 0.001523 | 0.021932 |

|               |                 |       |          |          |          |
|---------------|-----------------|-------|----------|----------|----------|
| RP11-242C19.2 | ENSG00000241886 | 562   | -0.42959 | 0.002358 | 0.028628 |
| RP11-493E12.2 | ENSG00000273302 | 791   | -0.42926 | 0.000156 | 0.006081 |
| CTD-2561B21.8 | ENSG00000280351 | 1798  | -0.42884 | 0.000979 | 0.016923 |
| RPL13P6       | ENSG00000213176 | 626   | -0.42869 | 0.004576 | 0.042832 |
| RP11-158H5.8  | ENSG00000274184 | 2021  | -0.42861 | 0.001522 | 0.021932 |
| AC007389.3    | ENSG00000235725 | 1656  | -0.42853 | 0.000647 | 0.013481 |
| ZNF587P1      | ENSG00000223965 | 1386  | -0.42812 | 0.003061 | 0.033666 |
| TCL6          | ENSG00000187621 | 10566 | -0.42778 | 6.9E-06  | 0.001124 |
| AC127904.2    | ENSG00000230732 | 1109  | -0.4274  | 0.000144 | 0.005789 |
| RN7SL535P     | ENSG00000239419 | 296   | -0.42706 | 0.001361 | 0.020437 |
| IGFBP4        | ENSG00000141753 | 2200  | -0.42692 | 0.000472 | 0.011228 |
| NPIPA3        | ENSG00000224712 | 2188  | -0.42678 | 0.004059 | 0.03995  |
| CTD-2154B17.4 | ENSG00000272324 | 377   | -0.42675 | 4.3E-05  | 0.003163 |
| RP11-47A8.5   | ENSG00000272933 | 1349  | -0.42636 | 2.16E-05 | 0.002118 |
| RNU6-82P      | ENSG00000200840 | 107   | -0.42632 | 0.003308 | 0.035237 |
| CTD-3220F14.2 | ENSG00000267682 | 375   | -0.42619 | 0.000673 | 0.013708 |
| DNM1P41       | ENSG00000280038 | 3350  | -0.42606 | 0.000125 | 0.005449 |
| MIR3679       | ENSG00000263813 | 68    | -0.42513 | 0.000308 | 0.008832 |
| EIF4A1P11     | ENSG00000231564 | 222   | -0.42488 | 0.001444 | 0.021278 |
| XIAP-AS1      | ENSG00000237331 | 482   | -0.42484 | 0.001091 | 0.018163 |
| LRP4          | ENSG00000134569 | 8597  | -0.42476 | 0.000127 | 0.005505 |
| FAR1-IT1      | ENSG00000254791 | 368   | -0.4238  | 0.000316 | 0.008954 |
| RP11-57H14.5  | ENSG00000279315 | 1286  | -0.42348 | 0.004406 | 0.042036 |
| RP1-197B17.6  | ENSG00000277874 | 1343  | -0.42338 | 0.002255 | 0.027817 |
| AC137934.1    | ENSG00000260923 | 3154  | -0.42325 | 0.000136 | 0.005622 |
| RP11-214J9.1  | ENSG00000235440 | 820   | -0.42223 | 0.000248 | 0.007941 |
| ITPK1-AS1     | ENSG00000258730 | 4701  | -0.42214 | 0.000635 | 0.013325 |
| RP11-154B12.3 | ENSG00000259177 | 458   | -0.42213 | 0.001952 | 0.025456 |
| YRDCP2        | ENSG00000236745 | 642   | -0.4221  | 0.003832 | 0.0385   |
| RPL31P58      | ENSG00000243053 | 379   | -0.42204 | 0.003171 | 0.034387 |
| HNRNPA1P17    | ENSG00000243188 | 924   | -0.4215  | 0.003047 | 0.033583 |
| RP11-545N8.3  | ENSG00000259125 | 879   | -0.42146 | 5.15E-05 | 0.003529 |
| TUBBP10       | ENSG00000226147 | 1301  | -0.42139 | 0.001764 | 0.024003 |
| RP11-236P24.3 | ENSG00000234019 | 615   | -0.42133 | 0.002158 | 0.027203 |
| RP11-16C1.1   | ENSG00000265342 | 372   | -0.42038 | 0.005312 | 0.047152 |
| RP11-660M5.1  | ENSG00000271172 | 511   | -0.42026 | 0.004467 | 0.042347 |
| MT-TT         | ENSG00000210195 | 66    | -0.42026 | 0.000693 | 0.013899 |
| RP11-166P13.4 | ENSG00000263089 | 4281  | -0.42024 | 6.26E-05 | 0.003815 |
| NEAT1_2       | ENSG00000278050 | 105   | -0.41963 | 0.000854 | 0.015591 |
| MT-TY         | ENSG00000210144 | 66    | -0.41902 | 0.000309 | 0.008834 |
| EGLN3P1       | ENSG00000256134 | 720   | -0.41888 | 0.003829 | 0.038493 |

|                |                 |      |          |          |          |
|----------------|-----------------|------|----------|----------|----------|
| CTD-2013N17.6  | ENSG00000280332 | 1999 | -0.41871 | 0.00041  | 0.010339 |
| ULK1           | ENSG00000177169 | 7608 | -0.41841 | 0.000165 | 0.006251 |
| OMP            | ENSG00000254550 | 492  | -0.41823 | 0.005083 | 0.045871 |
| RP11-288E14.2  | ENSG00000234106 | 349  | -0.41777 | 0.000654 | 0.013555 |
| NODAL          | ENSG00000156574 | 1693 | -0.41764 | 0.002367 | 0.028682 |
| RP11-174G6.1   | ENSG00000214772 | 657  | -0.41752 | 0.000125 | 0.005421 |
| DIP2A-IT1      | ENSG00000223692 | 428  | -0.4175  | 0.001195 | 0.019056 |
| RPL12P44       | ENSG00000227123 | 502  | -0.41713 | 0.001941 | 0.025399 |
| RP11-45A17.2   | ENSG00000277959 | 332  | -0.41707 | 0.002203 | 0.027516 |
| FTH1P4         | ENSG00000242992 | 553  | -0.41706 | 0.000597 | 0.012861 |
| RP11-342M21.2  | ENSG00000259202 | 472  | -0.41647 | 0.004469 | 0.042353 |
| TLE1P1         | ENSG00000228158 | 589  | -0.41645 | 0.005116 | 0.046071 |
| LTBP4          | ENSG00000090006 | 8108 | -0.41611 | 6.69E-05 | 0.003996 |
| RP11-1250I15.2 | ENSG00000278900 | 587  | -0.41603 | 0.005599 | 0.048489 |
| SNORD39        | ENSG00000264379 | 76   | -0.41582 | 0.001264 | 0.019589 |
| BACH1-AS1      | ENSG00000232118 | 879  | -0.41547 | 9.38E-05 | 0.004783 |
| RP11-703G6.1   | ENSG00000249614 | 812  | -0.41522 | 1.77E-05 | 0.001906 |
| IGF2BP2-AS1    | ENSG00000163915 | 3415 | -0.41381 | 0.001148 | 0.018667 |
| RP11-266L9.6   | ENSG00000263326 | 676  | -0.41381 | 0.004952 | 0.045037 |
| RP11-936I5.1   | ENSG00000266998 | 3419 | -0.41317 | 0.000971 | 0.016885 |
| PFN1P7         | ENSG00000227212 | 399  | -0.41266 | 0.003031 | 0.033442 |
| ARHGAP26-IT1   | ENSG00000230789 | 388  | -0.41263 | 0.00237  | 0.0287   |
| CTA-243E7.4    | ENSG00000279085 | 5388 | -0.41261 | 0.000368 | 0.009769 |
| AC073333.1     | ENSG00000280130 | 381  | -0.41257 | 0.000104 | 0.005013 |
| LARGE-AS1      | ENSG00000224973 | 2929 | -0.41251 | 0.002275 | 0.02792  |
| RP11-666A20.4  | ENSG00000248787 | 427  | -0.41214 | 0.001388 | 0.020712 |
| RP11-933H2.4   | ENSG00000250608 | 4200 | -0.41212 | 0.000142 | 0.005755 |
| POU5F1P5       | ENSG00000236375 | 658  | -0.41209 | 0.002058 | 0.026507 |
| RP5-1158E12.3  | ENSG00000231566 | 375  | -0.41172 | 0.002821 | 0.03202  |
| MNT            | ENSG00000070444 | 8728 | -0.41114 | 3.93E-06 | 0.000804 |
| CTC-251D13.1   | ENSG00000271795 | 3317 | -0.41076 | 0.005254 | 0.046884 |
| RP11-312B8.2   | ENSG00000227950 | 286  | -0.41037 | 0.003167 | 0.034378 |
| RP11-67A1.4    | ENSG00000279621 | 1141 | -0.40988 | 0.000128 | 0.005521 |
| RP11-466A19.8  | ENSG00000265222 | 927  | -0.40974 | 0.000665 | 0.013659 |
| RP11-108M12.3  | ENSG00000258592 | 1577 | -0.40903 | 0.001837 | 0.024626 |
| RP11-81A1.4    | ENSG00000279394 | 2260 | -0.40893 | 0.001554 | 0.022162 |
| AC064852.5     | ENSG00000213055 | 676  | -0.40823 | 0.003243 | 0.034763 |
| KLF3P1         | ENSG00000253218 | 1022 | -0.40818 | 0.001843 | 0.024678 |
| AP000253.1     | ENSG00000234509 | 2233 | -0.40767 | 0.002184 | 0.027382 |
| RP11-697K23.3  | ENSG00000279017 | 1025 | -0.40757 | 0.004784 | 0.044011 |
| SH3D21         | ENSG00000214193 | 4474 | -0.40738 | 0.00086  | 0.015677 |

|                 |                 |       |          |          |          |
|-----------------|-----------------|-------|----------|----------|----------|
| RP11-298J20.3   | ENSG00000226899 | 830   | -0.40725 | 0.000667 | 0.013662 |
| RP11-507K2.6    | ENSG00000278576 | 3178  | -0.4071  | 0.000109 | 0.005083 |
| RBPMSLP         | ENSG00000234159 | 502   | -0.40671 | 0.001164 | 0.018824 |
| RP11-96D1.9     | ENSG00000262514 | 1187  | -0.40627 | 0.000129 | 0.005521 |
| TPT1P10         | ENSG00000180221 | 496   | -0.40551 | 0.00185  | 0.024726 |
| LA16c-361A3.3   | ENSG00000261207 | 565   | -0.40499 | 0.00378  | 0.038253 |
| DAPK1-IT1       | ENSG00000236709 | 702   | -0.40484 | 0.005294 | 0.047084 |
| AC068039.4      | ENSG00000228389 | 2102  | -0.40484 | 1.84E-05 | 0.001937 |
| CH507-528H12.1  | ENSG00000280441 | 2197  | -0.40461 | 0.005446 | 0.047752 |
| C1orf233        | ENSG00000228594 | 2086  | -0.40391 | 0.005209 | 0.046622 |
| AUTS2           | ENSG00000158321 | 10420 | -0.40337 | 0.000241 | 0.007839 |
| BCL3            | ENSG00000069399 | 3242  | -0.40327 | 0.00013  | 0.005521 |
| WARS2-IT1       | ENSG00000224238 | 2060  | -0.40327 | 0.000549 | 0.012232 |
| RP11-390K5.6    | ENSG00000270060 | 574   | -0.40323 | 2.14E-05 | 0.00211  |
| RPL7L1P2        | ENSG00000231490 | 739   | -0.40313 | 0.004579 | 0.042832 |
| GTF2IP1         | ENSG00000277053 | 7453  | -0.40282 | 1.87E-05 | 0.00195  |
| YWHAQP5         | ENSG00000236564 | 1382  | -0.40248 | 0.000111 | 0.00512  |
| EID3            | ENSG00000255150 | 1464  | -0.4023  | 0.002842 | 0.032143 |
| RP11-104N10.2   | ENSG00000274627 | 5421  | -0.40057 | 0.000289 | 0.0086   |
| RP1-145M24.1    | ENSG00000254708 | 886   | -0.40011 | 0.004315 | 0.041449 |
| LL0XNC01-36H8.1 | ENSG00000279155 | 817   | -0.39944 | 0.00079  | 0.015025 |
| MTND4P19        | ENSG00000230338 | 478   | -0.39936 | 0.000808 | 0.015185 |
| ZNF865          | ENSG00000261221 | 5275  | -0.39888 | 0.000658 | 0.013582 |
| RP11-108L7.14   | ENSG00000273476 | 448   | -0.39835 | 0.001201 | 0.0191   |
| RP11-192H23.6   | ENSG00000265287 | 1083  | -0.39827 | 0.00083  | 0.015324 |
| SLC6A7          | ENSG00000011083 | 4391  | -0.3982  | 0.001667 | 0.023196 |
| CTD-2357A8.2    | ENSG00000279570 | 714   | -0.39814 | 0.000185 | 0.006705 |
| FKSG56          | ENSG00000279007 | 375   | -0.39757 | 1.92E-05 | 0.00197  |
| AJ271736.1      | ENSG00000276543 | 68    | -0.39744 | 0.003594 | 0.037149 |
| RP11-138I1.3    | ENSG00000266651 | 304   | -0.39725 | 4.16E-05 | 0.003099 |
| RP11-304F15.7   | ENSG00000262837 | 416   | -0.39685 | 0.001786 | 0.02418  |
| SLC10A5         | ENSG00000253598 | 2568  | -0.39668 | 0.000451 | 0.010932 |
| ZMYND19P1       | ENSG00000258917 | 787   | -0.39667 | 0.00414  | 0.040469 |
| RP11-436H11.5   | ENSG00000251456 | 558   | -0.39661 | 0.003704 | 0.037778 |
| RP11-52A20.2    | ENSG00000272033 | 1893  | -0.39647 | 0.00223  | 0.027667 |
| HNRNPA1P35      | ENSG00000225695 | 963   | -0.39585 | 0.004288 | 0.041337 |
| RP4-635A23.4    | ENSG00000238061 | 973   | -0.3958  | 0.000504 | 0.011747 |
| CCDC17          | ENSG00000159588 | 3323  | -0.3958  | 0.000332 | 0.009256 |
| RP1-122P22.2    | ENSG00000233895 | 1089  | -0.39535 | 2.86E-06 | 0.000668 |
| AC004951.6      | ENSG00000228434 | 1866  | -0.39533 | 0.001258 | 0.019567 |
| RP11-326K13.5   | ENSG00000274275 | 325   | -0.3949  | 0.004866 | 0.044482 |



|               |                 |       |          |          |          |
|---------------|-----------------|-------|----------|----------|----------|
| FLJ42393      | ENSG00000279891 | 2270  | -0.39486 | 4.44E-05 | 0.003209 |
| SLC9A1        | ENSG00000090020 | 5974  | -0.3948  | 0.001033 | 0.017454 |
| RP13-638C3.2  | ENSG00000262652 | 594   | -0.39408 | 0.003402 | 0.035952 |
| PRRT2         | ENSG00000167371 | 3318  | -0.39349 | 0.000335 | 0.009298 |
| SPTLC3        | ENSG00000172296 | 8520  | -0.3934  | 0.00027  | 0.008267 |
| RP11-709D24.6 | ENSG00000261442 | 1543  | -0.39245 | 0.001479 | 0.021614 |
| MIR6773       | ENSG00000276151 | 74    | -0.39233 | 0.003841 | 0.038553 |
| SLC6A20       | ENSG00000163817 | 6651  | -0.39194 | 0.001064 | 0.017885 |
| RP11-243J16.7 | ENSG00000236559 | 374   | -0.39189 | 0.00096  | 0.016775 |
| RPL7P14       | ENSG00000232994 | 741   | -0.39187 | 0.002028 | 0.026273 |
| HMGNI1P8      | ENSG00000241120 | 288   | -0.39134 | 8.64E-05 | 0.004578 |
| RP11-314D7.2  | ENSG00000258123 | 1256  | -0.39126 | 7.75E-05 | 0.004361 |
| ERVH-1        | ENSG00000251292 | 639   | -0.39119 | 0.002876 | 0.032351 |
| RP11-54A4.2   | ENSG00000237781 | 665   | -0.39062 | 0.002478 | 0.029474 |
| RP11-466A19.3 | ENSG00000266599 | 408   | -0.39059 | 9.97E-05 | 0.004942 |
| MAGI1-IT1     | ENSG00000272610 | 2567  | -0.39036 | 0.001521 | 0.021932 |
| RP11-46I1.2   | ENSG00000257864 | 573   | -0.39027 | 0.005442 | 0.047752 |
| RP11-76G10.1  | ENSG00000250354 | 680   | -0.39025 | 0.004784 | 0.044011 |
| RP11-44D5.2   | ENSG00000279465 | 660   | -0.39016 | 0.004947 | 0.04503  |
| MPRIP1        | ENSG00000214820 | 1089  | -0.38961 | 0.00011  | 0.005099 |
| LINC00893     | ENSG00000241769 | 3604  | -0.38948 | 5.63E-05 | 0.003692 |
| RP11-307C18.1 | ENSG00000272950 | 578   | -0.38916 | 0.004752 | 0.043908 |
| AC013275.2    | ENSG00000231013 | 2089  | -0.38871 | 0.004371 | 0.041753 |
| AC004813.1    | ENSG00000279777 | 375   | -0.38835 | 0.000624 | 0.013182 |
| MT-TC         | ENSG00000210140 | 66    | -0.38769 | 0.000937 | 0.016547 |
| ARHGEF26-AS1  | ENSG00000243069 | 5998  | -0.38758 | 7.38E-05 | 0.004224 |
| BCORL1        | ENSG00000085185 | 7996  | -0.38756 | 8.51E-05 | 0.004546 |
| ABTB1         | ENSG00000114626 | 6149  | -0.38697 | 0.000198 | 0.006983 |
| KDM6B         | ENSG00000132510 | 7258  | -0.38608 | 0.000233 | 0.007689 |
| RP3-525L6.2   | ENSG00000220920 | 359   | -0.38582 | 2.22E-05 | 0.002133 |
| UPK3BP1       | ENSG00000242435 | 509   | -0.38542 | 0.00568  | 0.048919 |
| CDC42BPG      | ENSG00000171219 | 6112  | -0.38467 | 0.000802 | 0.015136 |
| RP11-8P13.5   | ENSG00000274976 | 426   | -0.38452 | 0.003005 | 0.033226 |
| AGRN          | ENSG00000188157 | 10758 | -0.3844  | 0.004031 | 0.03982  |
| CTB-25B13.9   | ENSG00000267092 | 457   | -0.38425 | 0.004556 | 0.042762 |
| NRTN          | ENSG00000171119 | 1109  | -0.38397 | 0.003436 | 0.036161 |
| FOSL1P1       | ENSG00000248394 | 816   | -0.38391 | 0.002618 | 0.030523 |
| FAM229A       | ENSG00000225828 | 2845  | -0.3839  | 0.000229 | 0.007611 |
| UPK2          | ENSG00000110375 | 1106  | -0.3838  | 0.001391 | 0.020743 |
| RP11-80P20.3  | ENSG00000280399 | 3691  | -0.38361 | 0.005759 | 0.049297 |
| ITGB4         | ENSG00000132470 | 6761  | -0.38336 | 0.002184 | 0.027382 |

|               |                 |       |          |          |          |
|---------------|-----------------|-------|----------|----------|----------|
| MBD6          | ENSG00000166987 | 5646  | -0.38335 | 3.74E-05 | 0.002942 |
| AGAP4         | ENSG00000188234 | 3474  | -0.38329 | 2.91E-05 | 0.002574 |
| RP11-474I11.8 | ENSG00000264829 | 352   | -0.38282 | 0.00405  | 0.039927 |
| CCT8P1        | ENSG00000226015 | 1657  | -0.38201 | 0.002712 | 0.031279 |
| RP4-758J24.6  | ENSG00000280378 | 1755  | -0.3819  | 0.000581 | 0.012703 |
| RP13-554M15.7 | ENSG00000280287 | 4219  | -0.38179 | 0.001293 | 0.019886 |
| CATSPER2      | ENSG00000166762 | 8403  | -0.38174 | 0.002517 | 0.029831 |
| CDC42P1       | ENSG00000234933 | 548   | -0.38163 | 0.001498 | 0.021728 |
| RP11-530C5.2  | ENSG00000258044 | 667   | -0.38132 | 0.000983 | 0.016953 |
| RP11-484D2.4  | ENSG00000254577 | 183   | -0.3813  | 0.000969 | 0.016885 |
| DUSP8P5       | ENSG00000235316 | 1815  | -0.38104 | 0.001038 | 0.017521 |
| RP11-342K2.1  | ENSG00000279133 | 3819  | -0.3809  | 0.000105 | 0.005013 |
| AIG1P1        | ENSG00000249089 | 148   | -0.3807  | 0.001549 | 0.022148 |
| RP11-642A1.1  | ENSG00000280326 | 1518  | -0.38054 | 0.003635 | 0.037414 |
| RP4-740C4.5   | ENSG00000269896 | 2407  | -0.38037 | 0.000669 | 0.013666 |
| MDN1          | ENSG00000112159 | 18597 | -0.38017 | 0.00396  | 0.039361 |
| AJ271736.10   | ENSG00000270726 | 773   | -0.37987 | 0.001709 | 0.02356  |
| H2AFZP3       | ENSG00000218502 | 387   | -0.37972 | 0.0032   | 0.034527 |
| RP11-506K6.4  | ENSG00000272320 | 1989  | -0.37969 | 0.000579 | 0.012684 |
| RP11-17G12.3  | ENSG00000256746 | 536   | -0.37958 | 0.000203 | 0.007139 |
| RP11-511H9.3  | ENSG00000258230 | 642   | -0.37957 | 0.001762 | 0.024001 |
| SCOCP1        | ENSG00000258896 | 349   | -0.37934 | 0.004987 | 0.045238 |
| SEMA4B        | ENSG00000185033 | 7006  | -0.37922 | 0.000928 | 0.016487 |
| RP11-490I4.3  | ENSG00000230815 | 424   | -0.37902 | 0.004268 | 0.041215 |
| RP11-20I23.8  | ENSG00000269937 | 3626  | -0.37878 | 6.69E-05 | 0.003996 |
| RP11-571F15.2 | ENSG00000227383 | 327   | -0.3786  | 0.003619 | 0.037298 |
| ABTB2         | ENSG00000166016 | 4973  | -0.37853 | 0.001336 | 0.020271 |
| SGK223        | ENSG00000275342 | 4904  | -0.37819 | 0.000629 | 0.013228 |
| HHLA1         | ENSG00000132297 | 6143  | -0.37785 | 0.001738 | 0.023815 |
| RP11-855A2.1  | ENSG00000279573 | 1978  | -0.37749 | 0.000533 | 0.01207  |
| RP11-318K15.2 | ENSG00000254325 | 673   | -0.3774  | 0.001419 | 0.021063 |
| AL450226.2    | ENSG00000225084 | 710   | -0.37655 | 0.005815 | 0.049591 |
| WIPF3         | ENSG00000122574 | 6065  | -0.37549 | 0.003515 | 0.036726 |
| RP11-505K9.5  | ENSG00000274677 | 612   | -0.37537 | 0.000376 | 0.009902 |
| MTND4P20      | ENSG00000233377 | 869   | -0.37513 | 0.001209 | 0.019167 |
| DCUN1D2-AS    | ENSG00000233613 | 373   | -0.3751  | 0.00368  | 0.037651 |
| RP11-391L3.3  | ENSG00000279476 | 2794  | -0.37477 | 0.005054 | 0.045667 |
| RP11-71L14.3  | ENSG00000279693 | 2938  | -0.37477 | 0.005263 | 0.046916 |
| RN7SL657P     | ENSG00000264293 | 293   | -0.37443 | 0.003517 | 0.036726 |
| RP4-569M23.4  | ENSG00000273451 | 1006  | -0.37434 | 0.002823 | 0.03202  |
| KAZN          | ENSG00000189337 | 12644 | -0.37423 | 3.55E-06 | 0.000768 |

|                |                 |      |          |          |          |
|----------------|-----------------|------|----------|----------|----------|
| DUOX1          | ENSG00000137857 | 8784 | -0.37413 | 0.000111 | 0.00512  |
| BAI1           | ENSG00000181790 | 7356 | -0.37403 | 0.005487 | 0.047931 |
| RP11-888D10.4  | ENSG00000273284 | 1003 | -0.37394 | 0.001495 | 0.021726 |
| LRP4-AS1       | ENSG00000247675 | 1614 | -0.3736  | 0.003262 | 0.034894 |
| GRID2IP        | ENSG00000215045 | 4134 | -0.37339 | 0.003632 | 0.037412 |
| RNU6-1212P     | ENSG00000252832 | 104  | -0.37332 | 0.003905 | 0.038995 |
| SPINK9         | ENSG00000204909 | 841  | -0.37301 | 0.00022  | 0.007419 |
| AC069063.1     | ENSG00000279131 | 66   | -0.37289 | 0.00402  | 0.039752 |
| GATSL2         | ENSG00000274070 | 1363 | -0.37259 | 0.001727 | 0.023704 |
| RP11-1136G11.8 | ENSG00000257808 | 481  | -0.37211 | 0.001676 | 0.023278 |
| RP11-681L8.1   | ENSG00000254044 | 770  | -0.37203 | 0.004192 | 0.040763 |
| RP11-274B21.3  | ENSG00000243679 | 754  | -0.37175 | 0.00441  | 0.042036 |
| HMG2N2P35      | ENSG00000232875 | 270  | -0.37128 | 0.000261 | 0.008127 |
| AGRP           | ENSG00000159723 | 764  | -0.37054 | 0.003097 | 0.033909 |
| AC002066.1     | ENSG00000237813 | 1213 | -0.37023 | 0.003192 | 0.034477 |
| RNU6-1016P     | ENSG00000252498 | 94   | -0.36997 | 0.003921 | 0.039095 |
| RP11-49I11.4   | ENSG00000274849 | 449  | -0.36986 | 0.000433 | 0.01064  |
| RP11-1055B8.4  | ENSG00000262877 | 1565 | -0.36971 | 0.000497 | 0.011616 |
| RP5-1184F4.5   | ENSG00000236772 | 986  | -0.36945 | 9.98E-05 | 0.004942 |
| FBRSL1         | ENSG00000112787 | 9311 | -0.36919 | 0.000355 | 0.00956  |
| RPL35P3        | ENSG00000219902 | 371  | -0.36914 | 0.000429 | 0.010594 |
| SLC17A4        | ENSG00000146039 | 4633 | -0.36908 | 0.003612 | 0.037239 |
| DGKD           | ENSG00000077044 | 9771 | -0.36896 | 1.57E-05 | 0.001763 |
| RP11-474D14.2  | ENSG00000226318 | 763  | -0.36859 | 0.003215 | 0.034651 |
| SAP25          | ENSG00000205307 | 1388 | -0.36824 | 0.003174 | 0.034393 |
| RP11-459F6.3   | ENSG00000260927 | 577  | -0.36806 | 0.003674 | 0.037619 |
| RP4-614O4.13   | ENSG00000279253 | 1461 | -0.36798 | 0.000136 | 0.005622 |
| ZFPM1          | ENSG00000179588 | 6110 | -0.36766 | 0.000656 | 0.013567 |
| MICALCL        | ENSG00000133808 | 3448 | -0.36754 | 0.000578 | 0.01268  |
| MICALL2        | ENSG00000164877 | 8843 | -0.36743 | 0.001898 | 0.025099 |
| PRSS48         | ENSG00000189099 | 989  | -0.36698 | 0.001644 | 0.023003 |
| RP11-218E20.3  | ENSG00000258711 | 4714 | -0.36696 | 0.00162  | 0.022793 |
| RP11-368N21.5  | ENSG00000279583 | 1008 | -0.36667 | 0.000941 | 0.016589 |
| NUTM2G         | ENSG00000188152 | 3906 | -0.36647 | 0.000289 | 0.0086   |
| RP11-391L3.4   | ENSG00000279021 | 968  | -0.36637 | 0.000823 | 0.015262 |
| RP11-166N17.3  | ENSG00000226842 | 466  | -0.36637 | 0.000449 | 0.010901 |
| FBXW4P1        | ENSG00000230701 | 2239 | -0.36632 | 0.004107 | 0.040231 |
| TPM3P7         | ENSG00000187536 | 732  | -0.36584 | 0.002097 | 0.026732 |
| UBE2V2P1       | ENSG00000226255 | 398  | -0.3658  | 0.004117 | 0.040306 |
| RP3-508I15.21  | ENSG00000272669 | 491  | -0.36573 | 0.001346 | 0.020366 |
| PPP5D1         | ENSG00000230510 | 5703 | -0.36569 | 0.000693 | 0.013899 |

|                |                 |       |          |          |          |
|----------------|-----------------|-------|----------|----------|----------|
| RP11-649A18.4  | ENSG00000263786 | 717   | -0.36543 | 0.002718 | 0.031326 |
| MIR1260B       | ENSG00000266192 | 108   | -0.36541 | 0.004343 | 0.041581 |
| MAST3          | ENSG00000099308 | 6772  | -0.36528 | 0.000206 | 0.007163 |
| ENO1-IT1       | ENSG00000236269 | 744   | -0.36524 | 0.001993 | 0.025885 |
| YPEL3          | ENSG00000090238 | 3181  | -0.3648  | 0.000422 | 0.010497 |
| SMIM18         | ENSG00000253457 | 905   | -0.36467 | 0.001641 | 0.022974 |
| SPDYE1         | ENSG00000136206 | 2649  | -0.36425 | 0.001319 | 0.020157 |
| MIR6859-1      | ENSG00000278739 | 68    | -0.3642  | 0.000795 | 0.015076 |
| RP11-39K24.12  | ENSG00000228097 | 670   | -0.36418 | 0.004862 | 0.044458 |
| RP11-635N19.2  | ENSG00000267430 | 1153  | -0.36382 | 0.000104 | 0.005013 |
| CBX5P1         | ENSG00000241535 | 561   | -0.36361 | 0.000431 | 0.010606 |
| RP11-158H5.2   | ENSG00000279989 | 473   | -0.3635  | 0.000701 | 0.013971 |
| MTND4P15       | ENSG00000227321 | 1033  | -0.36323 | 0.002435 | 0.029154 |
| HMGA1P2        | ENSG00000248641 | 324   | -0.3632  | 0.000127 | 0.005505 |
| MXRA8          | ENSG00000162576 | 3622  | -0.3632  | 0.001925 | 0.02527  |
| AL132772.1     | ENSG00000265893 | 90    | -0.36314 | 0.003668 | 0.037619 |
| TSSK3          | ENSG00000162526 | 2191  | -0.36306 | 0.000322 | 0.009053 |
| RASGRF2-AS1    | ENSG00000251450 | 1166  | -0.36282 | 0.004973 | 0.045169 |
| RP1-86D1.3     | ENSG00000279776 | 1904  | -0.36268 | 0.000358 | 0.009626 |
| RP11-449G16.1  | ENSG00000273035 | 477   | -0.36259 | 0.000814 | 0.01523  |
| FAM83H         | ENSG00000180921 | 5654  | -0.36214 | 0.000742 | 0.014446 |
| RHOBTB2        | ENSG00000008853 | 6580  | -0.3621  | 0.00554  | 0.048173 |
| LINC00504      | ENSG00000248360 | 5095  | -0.36201 | 8.25E-05 | 0.004483 |
| RN7SL834P      | ENSG00000243650 | 286   | -0.36185 | 0.001539 | 0.022097 |
| RP11-1079K10.3 | ENSG00000248714 | 881   | -0.36163 | 0.002409 | 0.028944 |
| AC007050.18    | ENSG00000250261 | 1123  | -0.36121 | 0.001256 | 0.019567 |
| RP11-165N19.2  | ENSG00000225513 | 450   | -0.36119 | 0.001103 | 0.018281 |
| EPN1           | ENSG00000063245 | 17616 | -0.36103 | 0.000553 | 0.012276 |
| CACNA1H        | ENSG00000196557 | 8484  | -0.36089 | 0.005523 | 0.048089 |
| KIAA1522       | ENSG00000162522 | 5965  | -0.36062 | 0.000277 | 0.008378 |
| INF2           | ENSG00000203485 | 9488  | -0.35992 | 0.003202 | 0.034537 |
| IFITM10        | ENSG00000244242 | 4784  | -0.35975 | 0.005019 | 0.045441 |
| AP003068.23    | ENSG00000254614 | 1791  | -0.3597  | 0.003116 | 0.034021 |
| HMGB3P4        | ENSG00000228808 | 514   | -0.35953 | 0.002051 | 0.026467 |
| RP11-231E4.5   | ENSG00000276934 | 483   | -0.35921 | 0.004754 | 0.043913 |
| MRGPRX3        | ENSG00000179826 | 1741  | -0.359   | 0.004532 | 0.042609 |
| AC019070.1     | ENSG00000224007 | 1024  | -0.35865 | 0.002727 | 0.031391 |
| AC091132.1     | ENSG00000236234 | 769   | -0.35862 | 0.004776 | 0.043997 |
| AC011330.13    | ENSG00000275601 | 635   | -0.3581  | 0.001801 | 0.024312 |
| RECQL5         | ENSG00000108469 | 8766  | -0.35798 | 0.002623 | 0.030539 |
| ADCY9          | ENSG00000162104 | 10358 | -0.35736 | 0.001723 | 0.023704 |

|                    |                 |       |          |          |          |
|--------------------|-----------------|-------|----------|----------|----------|
| Clorf220           | ENSG00000213057 | 2775  | -0.35725 | 0.000527 | 0.012001 |
| RP11-881L2.1       | ENSG00000266541 | 534   | -0.35697 | 0.001193 | 0.019048 |
| ATN1               | ENSG00000111676 | 4762  | -0.35684 | 0.000537 | 0.012129 |
| ZNF579             | ENSG00000218891 | 3321  | -0.35677 | 0.001272 | 0.019699 |
| ZNF296             | ENSG00000170684 | 1744  | -0.35667 | 0.000353 | 0.009555 |
| CTD-2373N4.5       | ENSG00000253112 | 407   | -0.35665 | 0.002203 | 0.027516 |
| BCYRN1             | ENSG00000236824 | 13458 | -0.35595 | 7.57E-05 | 0.004295 |
| EEF1A1P25          | ENSG00000241429 | 1267  | -0.35553 | 0.005188 | 0.046555 |
| DOT1L              | ENSG00000104885 | 11272 | -0.35528 | 0.000627 | 0.013207 |
| CCDC162P           | ENSG00000203799 | 5378  | -0.35477 | 0.000669 | 0.013662 |
| RNF43              | ENSG00000108375 | 7505  | -0.35476 | 0.00083  | 0.015324 |
| RNF125             | ENSG00000101695 | 6508  | -0.35473 | 3.23E-05 | 0.00276  |
| RP11-39K24.13      | ENSG00000237711 | 774   | -0.35379 | 0.003876 | 0.03878  |
| CTC-277H1.6        | ENSG00000280163 | 1675  | -0.35361 | 0.002624 | 0.030539 |
| CTC-260E6.6        | ENSG00000267383 | 3684  | -0.3531  | 0.001112 | 0.018381 |
| ZMIZ1              | ENSG00000108175 | 11048 | -0.35302 | 7.83E-05 | 0.00438  |
| ZBTB7A             | ENSG00000178951 | 5725  | -0.35276 | 5.68E-07 | 0.000235 |
| AC004987.9         | ENSG00000233225 | 1148  | -0.35219 | 0.004905 | 0.044734 |
| CTC-436K13.3       | ENSG00000253424 | 548   | -0.35218 | 0.000878 | 0.015873 |
| HNRNPA1P14         | ENSG00000227638 | 935   | -0.35195 | 0.001409 | 0.020976 |
| EPPK1              | ENSG00000261150 | 16002 | -0.35125 | 0.002846 | 0.032169 |
| RP5-849H19.2       | ENSG00000213703 | 546   | -0.35097 | 0.002305 | 0.028169 |
| RP1-102K2.8        | ENSG00000268812 | 794   | -0.35043 | 0.000466 | 0.011131 |
| RP4-734G22.3       | ENSG00000272078 | 7923  | -0.35004 | 0.002319 | 0.028271 |
| RN7SL517P          | ENSG00000241939 | 305   | -0.3499  | 0.004497 | 0.042497 |
| SP2                | ENSG00000167182 | 3184  | -0.3497  | 0.000218 | 0.007397 |
| RP11-17A4.2        | ENSG00000254254 | 3078  | -0.34954 | 0.000663 | 0.013646 |
| RP11-665C16.1      | ENSG00000239686 | 348   | -0.3492  | 0.004306 | 0.041419 |
| YJEFN3             | ENSG00000250067 | 2959  | -0.34918 | 9.22E-05 | 0.004764 |
| RP11-521B24.3      | ENSG00000251602 | 2279  | -0.34904 | 0.004256 | 0.04119  |
| SH3GL1P1           | ENSG00000266777 | 2855  | -0.34894 | 0.002811 | 0.031988 |
| RP3-323A16.1       | ENSG00000279184 | 54079 | -0.34884 | 0.000122 | 0.005346 |
| PPP1R13L           | ENSG00000104881 | 5032  | -0.34851 | 0.0006   | 0.012876 |
| TYRO3P             | ENSG00000259581 | 2705  | -0.34848 | 0.001797 | 0.024274 |
| RP11-34A14.3       | ENSG00000230928 | 1168  | -0.34833 | 0.001232 | 0.019407 |
| ABC12-49244600F4.4 | ENSG00000276144 | 751   | -0.34826 | 0.002229 | 0.027667 |
| RP11-504P24.8      | ENSG00000272645 | 2052  | -0.34815 | 0.000547 | 0.012204 |
| AC003976.2         | ENSG00000274808 | 3014  | -0.3479  | 0.004509 | 0.042507 |
| AC093620.5         | ENSG00000241269 | 583   | -0.34772 | 0.005633 | 0.048677 |
| AC004471.9         | ENSG00000223461 | 582   | -0.34766 | 0.004159 | 0.040586 |

|                |                 |       |          |          |          |
|----------------|-----------------|-------|----------|----------|----------|
| ZDHHC14        | ENSG00000175048 | 11121 | -0.34765 | 5.43E-06 | 0.000971 |
| NNAT           | ENSG00000053438 | 1297  | -0.34756 | 0.001563 | 0.022273 |
| TCF3P1         | ENSG00000236567 | 1937  | -0.34746 | 0.005576 | 0.048363 |
| RP11-392O18.2  | ENSG00000271711 | 616   | -0.34739 | 0.001133 | 0.018518 |
| CEP170B        | ENSG00000099814 | 7199  | -0.34736 | 0.001234 | 0.019408 |
| RP11-302F12.10 | ENSG00000250541 | 483   | -0.34726 | 0.002388 | 0.028791 |
| RP11-293A21.2  | ENSG00000248340 | 743   | -0.34709 | 0.0032   | 0.034527 |
| AC079807.3     | ENSG00000236549 | 455   | -0.3469  | 0.002025 | 0.026258 |
| CTD-2583A14.8  | ENSG00000269867 | 679   | -0.34654 | 0.000479 | 0.011314 |
| RP11-894P9.1   | ENSG00000246451 | 1404  | -0.34618 | 2.23E-05 | 0.002133 |
| ARHGAP39       | ENSG00000147799 | 4888  | -0.34596 | 0.000463 | 0.011105 |
| LTB4R          | ENSG00000213903 | 4465  | -0.34595 | 0.000238 | 0.007776 |
| RGS17P1        | ENSG00000229473 | 553   | -0.3454  | 0.000183 | 0.006688 |
| AC096574.4     | ENSG00000225057 | 3890  | -0.34534 | 0.000577 | 0.012663 |
| RP11-396K3.1   | ENSG00000233369 | 3609  | -0.3453  | 0.004813 | 0.044162 |
| RLIMP1         | ENSG00000229456 | 1680  | -0.34528 | 0.000357 | 0.009607 |
| AC138035.2     | ENSG00000238035 | 1838  | -0.34504 | 0.00091  | 0.016287 |
| FAM35CP        | ENSG00000259096 | 2470  | -0.34472 | 0.000433 | 0.010645 |
| RP11-843P14.1  | ENSG00000251414 | 528   | -0.34468 | 0.002882 | 0.032371 |
| SEMA4G         | ENSG00000095539 | 5253  | -0.3445  | 3.64E-05 | 0.002906 |
| KRT18P4        | ENSG00000229222 | 1288  | -0.34413 | 0.001942 | 0.025399 |
| RP11-329N15.3  | ENSG00000279320 | 1991  | -0.344   | 0.004175 | 0.040678 |
| RP11-775J23.2  | ENSG00000243508 | 713   | -0.34399 | 0.000143 | 0.005758 |
| SRRM2          | ENSG00000167978 | 13266 | -0.34389 | 0.00016  | 0.006121 |
| SYNPO          | ENSG00000171992 | 10258 | -0.34386 | 0.000767 | 0.014715 |
| RP11-461A8.1   | ENSG00000261938 | 329   | -0.34363 | 0.002739 | 0.031391 |
| SOX12          | ENSG00000177732 | 4824  | -0.34338 | 9.31E-05 | 0.004774 |
| ARHGAP32       | ENSG00000134909 | 12841 | -0.34313 | 1.59E-06 | 0.000483 |
| AL442127.2     | ENSG00000278371 | 62    | -0.34297 | 0.00123  | 0.019395 |
| RP11-473O4.4   | ENSG00000254263 | 467   | -0.34209 | 0.00446  | 0.042322 |
| FLJ22447       | ENSG00000232774 | 2653  | -0.34208 | 6.02E-05 | 0.003803 |
| MT-CO1         | ENSG00000198804 | 1542  | -0.34158 | 0.000149 | 0.005876 |
| MTND4P23       | ENSG00000225796 | 1363  | -0.34062 | 0.00525  | 0.046859 |
| AC008993.2     | ENSG00000279385 | 744   | -0.34039 | 6.09E-05 | 0.003803 |
| RP11-411B10.7  | ENSG00000279352 | 864   | -0.3402  | 0.000516 | 0.01187  |
| SNORA70G       | ENSG00000206650 | 142   | -0.34006 | 0.003224 | 0.034694 |
| RN7SL16P       | ENSG00000243005 | 269   | -0.34001 | 0.001175 | 0.018886 |
| MIR181A2       | ENSG00000207595 | 110   | -0.33981 | 0.005192 | 0.046564 |
| RP3-405J10.3   | ENSG00000257298 | 4713  | -0.33948 | 0.000761 | 0.014613 |
| FAT1           | ENSG00000083857 | 16177 | -0.33913 | 0.000106 | 0.005029 |
| RP11-421E14.2  | ENSG00000264895 | 2170  | -0.33892 | 0.004083 | 0.040098 |

|                |                 |       |          |          |          |
|----------------|-----------------|-------|----------|----------|----------|
| MIR4743        | ENSG00000266276 | 112   | -0.33873 | 0.002068 | 0.026558 |
| LENG8          | ENSG00000167615 | 6469  | -0.33812 | 0.000699 | 0.013945 |
| HNRNPA3P9      | ENSG00000270903 | 979   | -0.33759 | 0.00575  | 0.04927  |
| MEX3D          | ENSG00000181588 | 2850  | -0.33717 | 3.84E-05 | 0.002967 |
| HMGB3P14       | ENSG00000231845 | 599   | -0.33685 | 0.000588 | 0.01278  |
| TPM3P1         | ENSG00000213050 | 747   | -0.33666 | 0.004892 | 0.044625 |
| RP11-562A8.1   | ENSG00000242737 | 359   | -0.33616 | 0.001223 | 0.019333 |
| TTYH1          | ENSG00000167614 | 7068  | -0.33598 | 0.003054 | 0.033645 |
| RP11-423E7.2   | ENSG00000279862 | 1399  | -0.33592 | 0.005212 | 0.04663  |
| ATXN2L         | ENSG00000168488 | 6508  | -0.33566 | 3.91E-05 | 0.002999 |
| DOCK5          | ENSG00000147459 | 15960 | -0.33559 | 2.9E-05  | 0.002574 |
| RP11-780K2.1   | ENSG00000257359 | 570   | -0.33558 | 3.51E-05 | 0.002905 |
| AC004754.3     | ENSG00000269881 | 2242  | -0.33556 | 0.000723 | 0.014245 |
| HNF1A-AS1      | ENSG00000241388 | 3859  | -0.33553 | 0.001903 | 0.025119 |
| RP11-823P9.4   | ENSG00000279107 | 1161  | -0.33546 | 0.001393 | 0.02077  |
| RP11-39K24.4   | ENSG00000224083 | 1528  | -0.33493 | 0.005202 | 0.046594 |
| MAF            | ENSG00000178573 | 6976  | -0.33489 | 0.001346 | 0.020366 |
| CMIP           | ENSG00000153815 | 12715 | -0.33486 | 7.52E-06 | 0.001161 |
| ZBTB20-AS4     | ENSG00000242767 | 675   | -0.3343  | 0.004314 | 0.041449 |
| Z95152.1       | ENSG00000221743 | 91    | -0.33381 | 0.000268 | 0.00824  |
| RP11-166B2.3   | ENSG00000261560 | 1495  | -0.33364 | 0.00068  | 0.013767 |
| PLEKHM1P       | ENSG00000214176 | 8469  | -0.33359 | 0.000184 | 0.006694 |
| RP11-731D1.1   | ENSG00000249012 | 486   | -0.33346 | 0.004476 | 0.042394 |
| NDUFA6-AS1     | ENSG00000237037 | 5206  | -0.33346 | 0.000529 | 0.012008 |
| ZNF483         | ENSG00000173258 | 5738  | -0.33338 | 0.004828 | 0.044254 |
| MIR6723        | ENSG00000237973 | 1543  | -0.33331 | 0.003194 | 0.034488 |
| RP11-284F21.7  | ENSG00000229953 | 758   | -0.33269 | 0.001768 | 0.024008 |
| RP5-901A4.1    | ENSG00000255306 | 739   | -0.33216 | 0.005445 | 0.047752 |
| RP4-591N18.2   | ENSG00000232564 | 2483  | -0.33201 | 0.000766 | 0.01471  |
| NATD1          | ENSG00000274180 | 4931  | -0.33201 | 0.00145  | 0.021343 |
| NCOR2          | ENSG00000196498 | 13975 | -0.33179 | 0.000121 | 0.005346 |
| AIRN           | ENSG00000268257 | 4374  | -0.33177 | 0.000828 | 0.015324 |
| RP11-862L9.3   | ENSG00000266844 | 2478  | -0.33117 | 0.000142 | 0.005755 |
| CTD-2576D5.4   | ENSG00000261448 | 641   | -0.33065 | 5.92E-06 | 0.001037 |
| RP11-54H7.4    | ENSG00000275216 | 4205  | -0.3306  | 0.0052   | 0.046594 |
| RP11-574K11.29 | ENSG00000272140 | 1192  | -0.33058 | 0.000846 | 0.0155   |
| AC004490.1     | ENSG00000267122 | 2738  | -0.33044 | 0.005569 | 0.04835  |
| AC004837.5     | ENSG00000228554 | 731   | -0.33043 | 0.000289 | 0.0086   |
| ITFG3          | ENSG00000167930 | 4699  | -0.32996 | 0.001448 | 0.021314 |
| MT-CO2         | ENSG00000198712 | 684   | -0.32994 | 0.001513 | 0.021862 |
| GOLGA2P5       | ENSG00000238105 | 10957 | -0.32982 | 0.001178 | 0.018908 |

|                |                 |       |          |          |          |
|----------------|-----------------|-------|----------|----------|----------|
| AC073130.3     | ENSG00000243243 | 917   | -0.32934 | 0.004275 | 0.04124  |
| GS1-124K5.11   | ENSG00000229180 | 7092  | -0.32917 | 0.000698 | 0.013945 |
| RP11-1046B16.3 | ENSG00000273797 | 527   | -0.32915 | 0.002326 | 0.028345 |
| ITSN1          | ENSG00000205726 | 21748 | -0.32909 | 4.5E-06  | 0.00086  |
| RP4-569M23.5   | ENSG00000267882 | 2253  | -0.32869 | 0.001265 | 0.019597 |
| SPTB           | ENSG00000070182 | 14772 | -0.32863 | 0.000394 | 0.010124 |
| NRBF2P5        | ENSG00000270427 | 788   | -0.32857 | 0.002653 | 0.030787 |
| AC005519.4     | ENSG00000258559 | 1367  | -0.32833 | 0.004353 | 0.04166  |
| AC124914.3     | ENSG00000231395 | 518   | -0.32828 | 0.00262  | 0.030524 |
| CIC            | ENSG00000079432 | 9494  | -0.32825 | 0.000987 | 0.016984 |
| RP1-86D1.2     | ENSG00000228972 | 1828  | -0.3281  | 0.003346 | 0.035524 |
| RP11-325L12.5  | ENSG00000270218 | 589   | -0.32783 | 0.003598 | 0.037179 |
| RP11-946L20.4  | ENSG00000253103 | 900   | -0.32778 | 0.00036  | 0.009633 |
| RP11-120K19.3  | ENSG00000279236 | 1303  | -0.32732 | 0.002745 | 0.031391 |
| FKSG61         | ENSG00000280308 | 375   | -0.32686 | 0.00128  | 0.019765 |
| AC007192.6     | ENSG00000269145 | 463   | -0.32675 | 0.001079 | 0.018056 |
| RP11-304L19.11 | ENSG00000261663 | 788   | -0.32634 | 0.002422 | 0.029045 |
| RP1-86D1.4     | ENSG00000227112 | 339   | -0.32579 | 0.00462  | 0.043079 |
| RP11-415F23.4  | ENSG00000272529 | 551   | -0.32553 | 0.000972 | 0.016885 |
| AHNAK          | ENSG00000124942 | 19465 | -0.32549 | 0.000414 | 0.010372 |
| TMEM51-AS1     | ENSG00000175147 | 7100  | -0.32545 | 0.000285 | 0.008535 |
| NOTCH4         | ENSG00000204301 | 9748  | -0.32484 | 0.00171  | 0.02356  |
| C4orf32        | ENSG00000174749 | 8901  | -0.32467 | 7.06E-05 | 0.004117 |
| NPM1P29        | ENSG00000239351 | 803   | -0.32385 | 0.001087 | 0.018114 |
| KIAA1217       | ENSG00000120549 | 10392 | -0.32346 | 6.18E-06 | 0.001068 |
| FOXP2          | ENSG00000128573 | 15782 | -0.32336 | 0.00327  | 0.034935 |
| CASZ1          | ENSG00000130940 | 11336 | -0.32313 | 0.001369 | 0.020516 |
| RP11-97O12.6   | ENSG00000271997 | 3844  | -0.32287 | 0.002496 | 0.029643 |
| ATP11A         | ENSG00000068650 | 13733 | -0.32188 | 0.000299 | 0.008696 |
| RP11-167N5.5   | ENSG00000267834 | 497   | -0.32164 | 0.00442  | 0.042073 |
| LINC00954      | ENSG00000228784 | 4683  | -0.32154 | 0.005688 | 0.04895  |
| TRIM17         | ENSG00000162931 | 3548  | -0.32141 | 0.001002 | 0.017189 |
| SLC25A37       | ENSG00000147454 | 8147  | -0.32104 | 0.000309 | 0.008834 |
| RP11-57H12.3   | ENSG00000226026 | 2505  | -0.321   | 0.005424 | 0.047709 |
| TCF7           | ENSG00000081059 | 10063 | -0.3201  | 6.78E-06 | 0.001124 |
| NRARP          | ENSG00000198435 | 1770  | -0.3198  | 0.000647 | 0.013478 |
| BNIP3P5        | ENSG00000260571 | 498   | -0.31936 | 0.00154  | 0.022097 |
| RP11-384K6.6   | ENSG00000260404 | 4395  | -0.31904 | 0.003589 | 0.03713  |
| RP11-322E11.2  | ENSG00000275512 | 2533  | -0.31879 | 0.000556 | 0.012313 |
| PKD1P6         | ENSG00000250251 | 6015  | -0.31878 | 0.002879 | 0.032351 |
| AC016831.7     | ENSG00000233559 | 1616  | -0.31866 | 0.000221 | 0.007424 |



|               |                 |       |          |          |          |
|---------------|-----------------|-------|----------|----------|----------|
| RPLP1P11      | ENSG00000243686 | 341   | -0.31837 | 0.004762 | 0.043941 |
| RP11-326N17.2 | ENSG00000274281 | 2127  | -0.31789 | 0.000514 | 0.011834 |
| RP11-157K17.5 | ENSG00000179038 | 1599  | -0.3177  | 0.002171 | 0.027278 |
| RP11-306O13.1 | ENSG00000213121 | 1212  | -0.31763 | 0.001623 | 0.022793 |
| VMAC          | ENSG00000187650 | 2254  | -0.31758 | 0.000299 | 0.008696 |
| FAM84A        | ENSG00000162981 | 8384  | -0.31758 | 0.001479 | 0.021614 |
| MIR1281       | ENSG00000221160 | 54    | -0.31711 | 0.001485 | 0.021643 |
| UVSSA         | ENSG00000163945 | 7830  | -0.31705 | 0.002893 | 0.032406 |
| WDR88         | ENSG00000166359 | 1841  | -0.31702 | 0.001166 | 0.018836 |
| PRR12         | ENSG00000126464 | 7093  | -0.31667 | 0.002582 | 0.030206 |
| AC007191.4    | ENSG00000279407 | 2995  | -0.31637 | 0.002096 | 0.026732 |
| BCAN          | ENSG00000132692 | 4931  | -0.3162  | 0.001366 | 0.020482 |
| RP11-335G20.7 | ENSG00000259984 | 459   | -0.31616 | 0.003874 | 0.038774 |
| NOL4L         | ENSG00000197183 | 9448  | -0.31599 | 2.14E-05 | 0.00211  |
| RP4-569M23.2  | ENSG00000231119 | 1809  | -0.31598 | 0.002109 | 0.026836 |
| ADAMTSL4      | ENSG00000143382 | 6432  | -0.31591 | 0.004809 | 0.044152 |
| VIPR1-AS1     | ENSG00000232354 | 2743  | -0.31587 | 0.001781 | 0.024153 |
| CTB-39G8.3    | ENSG00000267344 | 457   | -0.3157  | 0.001    | 0.017155 |
| FOXP4         | ENSG00000137166 | 6170  | -0.3156  | 0.000754 | 0.014552 |
| MGAT4C        | ENSG00000182050 | 27763 | -0.31539 | 0.004957 | 0.045075 |
| RP11-419C5.2  | ENSG00000226232 | 1728  | -0.31523 | 0.001307 | 0.020039 |
| PAICSP1       | ENSG00000226055 | 1217  | -0.315   | 0.001318 | 0.020148 |
| HNRNPMP1      | ENSG00000259335 | 1768  | -0.31499 | 0.003774 | 0.038204 |
| TET2-AS1      | ENSG00000251586 | 537   | -0.31483 | 0.003423 | 0.036104 |
| SPIRE2        | ENSG00000204991 | 7975  | -0.31467 | 0.001621 | 0.022793 |
| YBX2          | ENSG00000006047 | 4618  | -0.31445 | 0.004981 | 0.045208 |
| CFAP52        | ENSG00000166596 | 3078  | -0.31444 | 0.00194  | 0.025399 |
| RP11-144I2.1  | ENSG00000279029 | 1855  | -0.31437 | 0.002829 | 0.032062 |
| RP11-138I18.1 | ENSG00000271360 | 923   | -0.31424 | 0.003059 | 0.033666 |
| CAMSAP3       | ENSG00000076826 | 4849  | -0.31415 | 0.001876 | 0.024905 |
| MAML3         | ENSG00000196782 | 7012  | -0.31412 | 5.57E-05 | 0.00368  |
| RP11-10022.1  | ENSG00000241168 | 1834  | -0.31341 | 0.004514 | 0.042518 |
| AGAP1-IT1     | ENSG00000235529 | 664   | -0.31278 | 0.002236 | 0.027677 |
| RP11-75C10.6  | ENSG00000279801 | 2464  | -0.31267 | 0.003722 | 0.037892 |
| HNRNPA1P49    | ENSG00000233231 | 904   | -0.31217 | 0.000977 | 0.016916 |
| RP11-321L2.2  | ENSG00000237414 | 687   | -0.31172 | 0.001525 | 0.021957 |
| KMT2B         | ENSG00000272333 | 10279 | -0.31151 | 0.000387 | 0.010037 |
| TLE3          | ENSG00000140332 | 12617 | -0.31144 | 3.22E-05 | 0.00276  |
| CTD-3099C6.11 | ENSG00000268970 | 644   | -0.31137 | 0.003508 | 0.036679 |
| SEMA3F        | ENSG00000001617 | 4826  | -0.31136 | 0.003564 | 0.037022 |
| RP4-724E16.2  | ENSG00000197670 | 1947  | -0.31119 | 0.002219 | 0.027658 |

|               |                 |       |          |          |          |
|---------------|-----------------|-------|----------|----------|----------|
| LRFN3         | ENSG00000126243 | 4044  | -0.31108 | 0.003276 | 0.034992 |
| SATB2         | ENSG00000119042 | 10958 | -0.31016 | 0.003122 | 0.034056 |
| RASA4         | ENSG00000105808 | 8077  | -0.31002 | 0.005553 | 0.048249 |
| BNIP3         | ENSG00000176171 | 4847  | -0.30954 | 0.002257 | 0.027831 |
| CTD-2574D22.3 | ENSG00000279789 | 2194  | -0.30908 | 0.000527 | 0.012001 |
| RPL3P1        | ENSG00000228149 | 1211  | -0.30893 | 0.00587  | 0.049922 |
| AC006128.2    | ENSG00000279716 | 1661  | -0.30887 | 0.000135 | 0.005613 |
| FZD7          | ENSG00000155760 | 3859  | -0.30823 | 0.00558  | 0.04837  |
| KIAA1671      | ENSG00000197077 | 15818 | -0.30775 | 0.000387 | 0.010037 |
| GLUD1P3       | ENSG00000250959 | 1028  | -0.3077  | 0.000138 | 0.005673 |
| NUMBL         | ENSG00000105245 | 5823  | -0.30768 | 0.001252 | 0.019535 |
| AC073046.25   | ENSG00000235499 | 390   | -0.3062  | 0.002592 | 0.030288 |
| ANO6          | ENSG00000177119 | 8235  | -0.30573 | 0.001618 | 0.022793 |
| PRR5          | ENSG00000186654 | 5247  | -0.30542 | 0.002824 | 0.03202  |
| AC114730.11   | ENSG00000235351 | 584   | -0.30529 | 0.000361 | 0.009649 |
| RP11-25C19.3  | ENSG00000233340 | 358   | -0.30528 | 0.002396 | 0.028857 |
| RP3-453C12.14 | ENSG00000275894 | 709   | -0.30511 | 0.00303  | 0.033442 |
| CTB-52I2.7    | ENSG00000279172 | 442   | -0.30507 | 0.001739 | 0.023815 |
| MAGI1         | ENSG00000151276 | 11649 | -0.30488 | 5.35E-07 | 0.000231 |
| AC006548.28   | ENSG00000280156 | 84332 | -0.30474 | 0.000349 | 0.009506 |
| AC008746.5    | ENSG00000235681 | 218   | -0.3041  | 0.004233 | 0.041038 |
| XYLT1         | ENSG00000103489 | 11004 | -0.30407 | 8.36E-07 | 0.000318 |
| ASB14         | ENSG00000239388 | 3232  | -0.30356 | 4.67E-05 | 0.003332 |
| NAP1L4P1      | ENSG00000177173 | 1157  | -0.30266 | 0.001258 | 0.019567 |
| AC015849.19   | ENSG00000270871 | 488   | -0.3023  | 0.003138 | 0.034177 |
| RPS6KA5       | ENSG00000100784 | 27726 | -0.30229 | 0.000372 | 0.009842 |
| AF131215.3    | ENSG00000254936 | 1741  | -0.30223 | 0.004757 | 0.043928 |
| EPS8L3        | ENSG00000198758 | 3477  | -0.30175 | 0.00029  | 0.008607 |
| PACS1         | ENSG00000175115 | 9037  | -0.30164 | 0.000164 | 0.006222 |
| ARR3          | ENSG00000120500 | 1729  | -0.30103 | 0.004343 | 0.041581 |
| TMEM45A       | ENSG00000181458 | 6005  | -0.30092 | 0.000184 | 0.006691 |
| TCTE3         | ENSG00000184786 | 769   | -0.30077 | 0.002513 | 0.029798 |
| TMEM198B      | ENSG00000182796 | 3564  | -0.30045 | 0.000108 | 0.00508  |
| CDK18         | ENSG00000117266 | 6831  | -0.30037 | 0.002375 | 0.028733 |
| Z83851.4      | ENSG00000233903 | 545   | -0.29952 | 0.002541 | 0.029912 |
| RNF44         | ENSG00000146083 | 5660  | -0.2995  | 0.000172 | 0.006425 |
| RP11-89H19.1  | ENSG00000205537 | 1287  | -0.29942 | 0.002283 | 0.027981 |
| AC092669.3    | ENSG00000232164 | 1679  | -0.299   | 0.000249 | 0.007947 |
| LA16c-60D12.1 | ENSG00000280341 | 6114  | -0.29884 | 0.000489 | 0.011511 |
| CTD-2630F21.1 | ENSG00000267309 | 1392  | -0.29851 | 0.000479 | 0.011314 |
| IL22RA1       | ENSG00000142677 | 2798  | -0.29839 | 0.003681 | 0.037651 |

|                |                 |       |          |          |          |
|----------------|-----------------|-------|----------|----------|----------|
| ICOSLG         | ENSG00000160223 | 8110  | -0.29788 | 0.003241 | 0.034763 |
| AGAP6          | ENSG00000204149 | 3160  | -0.29762 | 6.32E-05 | 0.003815 |
| KLF9           | ENSG00000119138 | 5175  | -0.29757 | 6.92E-05 | 0.004092 |
| TLN2           | ENSG00000171914 | 16202 | -0.29718 | 0.003884 | 0.038817 |
| MNX1           | ENSG00000130675 | 4202  | -0.29696 | 0.001724 | 0.023704 |
| RP11-815J21.1  | ENSG00000259453 | 746   | -0.29693 | 0.003811 | 0.038429 |
| CICP27         | ENSG00000233750 | 3812  | -0.29655 | 0.005803 | 0.049518 |
| AC010243.1     | ENSG00000279188 | 369   | -0.2959  | 0.005331 | 0.047234 |
| ACVR2B-AS1     | ENSG00000229589 | 2517  | -0.29583 | 0.004742 | 0.043861 |
| NBPF15         | ENSG00000266338 | 5306  | -0.29533 | 0.002102 | 0.026774 |
| ANKRD11        | ENSG00000167522 | 16949 | -0.2953  | 3.57E-06 | 0.000768 |
| RP13-1056D16.2 | ENSG00000244730 | 330   | -0.29508 | 0.003727 | 0.037892 |
| AC078883.3     | ENSG00000232788 | 1077  | -0.29506 | 0.003871 | 0.038751 |
| RP11-53I6.2    | ENSG00000263917 | 565   | -0.29505 | 0.000915 | 0.016338 |
| FGFRL1         | ENSG00000127418 | 4145  | -0.29482 | 0.000328 | 0.009191 |
| RP5-1160K1.6   | ENSG00000228703 | 688   | -0.29452 | 0.000269 | 0.00824  |
| TCF7L2         | ENSG00000148737 | 4935  | -0.29441 | 0.001024 | 0.017381 |
| RPL29P14       | ENSG00000241112 | 428   | -0.29428 | 0.003976 | 0.039444 |
| ANGPTL2        | ENSG00000136859 | 3889  | -0.29409 | 0.00155  | 0.022148 |
| ARRDC2         | ENSG00000105643 | 4637  | -0.29339 | 0.00023  | 0.007647 |
| CTD-2583A14.11 | ENSG00000270804 | 936   | -0.29263 | 0.000538 | 0.012135 |
| SCAF1          | ENSG00000126461 | 4548  | -0.29229 | 0.00148  | 0.021614 |
| RP11-337C18.8  | ENSG00000237188 | 3618  | -0.29208 | 0.000687 | 0.013855 |
| RP11-365N19.2  | ENSG00000259515 | 828   | -0.29206 | 0.000268 | 0.00824  |
| RP11-848P1.4   | ENSG00000266340 | 668   | -0.29188 | 0.005224 | 0.046721 |
| BAIAP2L2       | ENSG00000128298 | 2146  | -0.2918  | 0.003853 | 0.038632 |
| RP11-257O5.2   | ENSG00000279059 | 1667  | -0.29115 | 0.00209  | 0.026712 |
| SH3BP2         | ENSG00000087266 | 13968 | -0.29099 | 0.000655 | 0.013567 |
| GPR126         | ENSG00000112414 | 8473  | -0.29088 | 0.00183  | 0.024574 |
| MAPK8IP3       | ENSG00000138834 | 10285 | -0.29021 | 0.002153 | 0.027159 |
| LRRTM2         | ENSG00000146006 | 6095  | -0.28993 | 0.001336 | 0.020271 |
| SKI            | ENSG00000157933 | 6080  | -0.28986 | 0.000243 | 0.007878 |
| TMEM14E        | ENSG00000221962 | 378   | -0.28958 | 0.001848 | 0.024717 |
| PPP1R26-AS1    | ENSG00000225361 | 3750  | -0.28941 | 0.001901 | 0.025119 |
| CDCA4P4        | ENSG00000234219 | 680   | -0.28934 | 0.00075  | 0.014494 |
| PCBP2-OT1      | ENSG00000273658 | 182   | -0.28928 | 0.000468 | 0.011158 |
| C8orf44        | ENSG00000213865 | 2505  | -0.28924 | 0.000699 | 0.013945 |
| PABPC1P1       | ENSG00000231707 | 591   | -0.28921 | 0.001308 | 0.020039 |
| DYRK1B         | ENSG00000105204 | 3192  | -0.28916 | 0.003363 | 0.035639 |
| AC007383.3     | ENSG00000227946 | 1034  | -0.28906 | 9.17E-06 | 0.001298 |
| AC114498.1     | ENSG00000276171 | 63    | -0.28882 | 0.003233 | 0.034723 |

|                 |                 |       |          |          |          |
|-----------------|-----------------|-------|----------|----------|----------|
| RP11-108L7.4    | ENSG00000236662 | 342   | -0.28875 | 0.000502 | 0.011705 |
| SMAD3           | ENSG00000166949 | 9113  | -0.28838 | 0.000206 | 0.007171 |
| C6orf132        | ENSG00000188112 | 6852  | -0.28822 | 0.001336 | 0.020271 |
| RP4-584D14.5    | ENSG00000240449 | 577   | -0.28821 | 0.005331 | 0.047234 |
| WASH4P          | ENSG00000234769 | 5322  | -0.28802 | 0.000495 | 0.011611 |
| SH2D3A          | ENSG00000125731 | 5716  | -0.28748 | 0.005421 | 0.047709 |
| AMER1           | ENSG00000184675 | 8443  | -0.28696 | 0.001222 | 0.019323 |
| RP11-1376P16.2  | ENSG00000265678 | 555   | -0.28687 | 0.002267 | 0.027865 |
| RP11-549J18.1   | ENSG00000251023 | 3157  | -0.2864  | 0.004795 | 0.044081 |
| AC011747.4      | ENSG00000236008 | 8956  | -0.28629 | 0.00141  | 0.020981 |
| RP11-425M5.7    | ENSG00000276603 | 419   | -0.28587 | 0.001755 | 0.023967 |
| CTD-2619J13.14  | ENSG00000232098 | 3417  | -0.28586 | 0.0003   | 0.008696 |
| MICAL3          | ENSG00000243156 | 22354 | -0.285   | 2.34E-05 | 0.002189 |
| ZFP41           | ENSG00000264668 | 2897  | -0.28497 | 0.002513 | 0.029798 |
| PIK3R2          | ENSG00000105647 | 4524  | -0.28489 | 0.000133 | 0.005604 |
| RP4-534N18.2    | ENSG00000228634 | 517   | -0.2848  | 0.005063 | 0.045731 |
| MIR194-2        | ENSG00000229719 | 3647  | -0.28436 | 0.00286  | 0.032288 |
| PTGES2-AS1      | ENSG00000232850 | 1938  | -0.28435 | 0.003398 | 0.035932 |
| CSAD            | ENSG00000139631 | 4390  | -0.28402 | 0.000663 | 0.013646 |
| RP11-77H9.5     | ENSG00000259939 | 409   | -0.28393 | 0.000889 | 0.015995 |
| SOX13           | ENSG00000143842 | 7420  | -0.28309 | 0.000706 | 0.014023 |
| RP11-739N20.2   | ENSG00000226330 | 486   | -0.28279 | 0.005603 | 0.048489 |
| ODCP            | ENSG00000244556 | 1639  | -0.2826  | 0.001803 | 0.024323 |
| RP11-400N9.1    | ENSG00000259793 | 2285  | -0.28257 | 0.003095 | 0.033909 |
| LINC00887       | ENSG00000214145 | 4153  | -0.28243 | 0.003504 | 0.036668 |
| RP11-175P13.3   | ENSG00000257489 | 1405  | -0.28195 | 0.001913 | 0.025178 |
| XXbac-B461K10.4 | ENSG00000093100 | 4328  | -0.28176 | 0.00062  | 0.013137 |
| MAGI2           | ENSG00000187391 | 8946  | -0.28175 | 0.003141 | 0.034177 |
| AC096772.6      | ENSG00000244567 | 1262  | -0.28147 | 0.00123  | 0.019395 |
| RP11-624A21.1   | ENSG00000279912 | 3925  | -0.28135 | 0.000582 | 0.012714 |
| WASH6P          | ENSG00000182484 | 4618  | -0.28133 | 0.003181 | 0.034431 |
| DGCR11          | ENSG00000273311 | 2214  | -0.27977 | 9.68E-05 | 0.004873 |
| RP11-245J9.5    | ENSG00000271843 | 611   | -0.27959 | 0.002417 | 0.028993 |
| RP11-981P6.1    | ENSG00000258302 | 1711  | -0.27957 | 0.004804 | 0.044122 |
| RP11-333E13.2   | ENSG00000250568 | 315   | -0.27955 | 0.001065 | 0.017886 |
| CTD-2024I7.13   | ENSG00000246422 | 2480  | -0.2795  | 0.004361 | 0.041716 |
| SLX4            | ENSG00000188827 | 8591  | -0.27938 | 0.000711 | 0.014085 |
| TPM3P9          | ENSG00000241015 | 2920  | -0.27929 | 8.58E-05 | 0.004574 |
| GP1BA           | ENSG00000185245 | 2501  | -0.27911 | 0.00585  | 0.049804 |
| CREBBP          | ENSG00000005339 | 15068 | -0.27909 | 1.8E-06  | 0.000504 |
| LINC00894       | ENSG00000235703 | 6323  | -0.27907 | 0.002642 | 0.030704 |

|               |                 |       |          |          |          |
|---------------|-----------------|-------|----------|----------|----------|
| RP11-848P1.5  | ENSG00000264107 | 492   | -0.27839 | 0.004556 | 0.042762 |
| KB-1247B1.1   | ENSG00000249510 | 833   | -0.27836 | 0.000873 | 0.015849 |
| TRANK1        | ENSG00000168016 | 11177 | -0.27803 | 0.00375  | 0.038089 |
| CCDC157       | ENSG00000187860 | 6586  | -0.27779 | 0.001692 | 0.023377 |
| RP11-403H13.1 | ENSG00000224972 | 553   | -0.27754 | 0.003176 | 0.034409 |
| MGRN1         | ENSG00000102858 | 10219 | -0.27749 | 0.001788 | 0.024188 |
| RP3-477O4.14  | ENSG00000230155 | 839   | -0.27721 | 0.001194 | 0.019055 |
| IMPDH1P10     | ENSG00000232133 | 1542  | -0.277   | 0.00148  | 0.021614 |
| MTA1          | ENSG00000182979 | 6966  | -0.27695 | 0.000359 | 0.009626 |
| RP11-174G6.5  | ENSG00000261324 | 5428  | -0.27676 | 0.00052  | 0.011906 |
| LUC7L         | ENSG00000007392 | 6176  | -0.27604 | 8.39E-08 | 7.64E-05 |
| MAST2         | ENSG00000086015 | 7877  | -0.27572 | 0.001118 | 0.018442 |
| TJP3          | ENSG00000105289 | 4217  | -0.2755  | 0.003431 | 0.036144 |
| CTD-2117L12.1 | ENSG00000250127 | 1184  | -0.27545 | 0.004204 | 0.040847 |
| AL078471.5    | ENSG00000273840 | 3336  | -0.27534 | 0.000588 | 0.01278  |
| RP11-382B18.1 | ENSG00000279417 | 3930  | -0.2751  | 0.000596 | 0.012854 |
| SLC23A2       | ENSG00000089057 | 7515  | -0.27455 | 3.62E-05 | 0.002905 |
| KMT2D         | ENSG00000167548 | 20476 | -0.27448 | 0.000693 | 0.013899 |
| RP11-153M7.3  | ENSG00000250771 | 3277  | -0.27446 | 0.001025 | 0.017381 |
| LENG8-AS1     | ENSG00000226696 | 1248  | -0.27434 | 0.001187 | 0.018997 |
| KIAA1161      | ENSG00000164976 | 6398  | -0.27391 | 0.002051 | 0.026467 |
| PLEKHA7       | ENSG00000166689 | 9575  | -0.27379 | 0.001032 | 0.017454 |
| RP11-463O12.5 | ENSG00000280138 | 18662 | -0.27353 | 0.000502 | 0.011705 |
| SETD1B        | ENSG00000139718 | 8314  | -0.27348 | 0.00066  | 0.013603 |
| PSMD6-AS2     | ENSG00000239653 | 2456  | -0.27259 | 0.001183 | 0.018947 |
| PTPN23        | ENSG00000076201 | 5981  | -0.27241 | 0.002679 | 0.031022 |
| KIZ-AS1       | ENSG00000232712 | 5451  | -0.27184 | 0.003912 | 0.039051 |
| AC087294.2    | ENSG00000235530 | 1519  | -0.2718  | 0.002635 | 0.030635 |
| RP11-206L10.2 | ENSG00000228327 | 1317  | -0.27137 | 0.002276 | 0.02792  |
| CTC-444N24.6  | ENSG00000267871 | 738   | -0.27084 | 0.001564 | 0.022278 |
| RP4-758J18.13 | ENSG00000272455 | 1523  | -0.27082 | 0.000275 | 0.008351 |
| RP3-395M20.8  | ENSG00000238164 | 6137  | -0.27074 | 0.001017 | 0.0173   |
| WASH5P        | ENSG00000225373 | 6599  | -0.27067 | 0.000841 | 0.015449 |
| RP11-317N8.5  | ENSG00000258938 | 2867  | -0.27064 | 0.002452 | 0.029247 |
| ABHD16B       | ENSG00000183260 | 2094  | -0.27007 | 0.003521 | 0.036745 |
| RP11-700A24.1 | ENSG00000279742 | 2387  | -0.26985 | 0.001949 | 0.025431 |
| AC092415.1    | ENSG00000235493 | 850   | -0.26965 | 0.002944 | 0.032789 |
| RP11-767N6.2  | ENSG00000234329 | 788   | -0.26938 | 0.002706 | 0.031232 |
| PER2          | ENSG00000132326 | 6877  | -0.26925 | 0.002095 | 0.026732 |
| RP13-516M14.8 | ENSG00000280407 | 2778  | -0.26894 | 0.001311 | 0.020085 |
| ARHGEF5       | ENSG00000050327 | 5818  | -0.26875 | 0.001927 | 0.025275 |

|                   |                 |       |          |          |          |
|-------------------|-----------------|-------|----------|----------|----------|
| SGK494            | ENSG00000167524 | 4663  | -0.26755 | 0.000618 | 0.01312  |
| RBPM5             | ENSG00000157110 | 8931  | -0.26728 | 0.000101 | 0.004971 |
| AC093110.3        | ENSG00000238018 | 602   | -0.26715 | 0.002005 | 0.026026 |
| PLEKHG2           | ENSG00000090924 | 9200  | -0.26674 | 0.005653 | 0.048804 |
| ZBTB20-AS1        | ENSG00000241560 | 2035  | -0.26672 | 0.000883 | 0.01593  |
| PTPRJ             | ENSG00000149177 | 9620  | -0.26647 | 0.000266 | 0.008226 |
| RP4-591C20.9      | ENSG00000268858 | 3082  | -0.26638 | 0.000595 | 0.012854 |
| AC005785.2        | ENSG00000268189 | 1911  | -0.26629 | 0.000142 | 0.005755 |
| RP11-449P15.2     | ENSG00000273151 | 6758  | -0.26621 | 0.003232 | 0.034723 |
| ADNP-AS1          | ENSG00000259456 | 927   | -0.26563 | 0.00238  | 0.028733 |
| RP11-474B12.1     | ENSG00000261369 | 870   | -0.26557 | 0.004949 | 0.04503  |
| RP11-334A14.2     | ENSG00000236360 | 502   | -0.26555 | 0.003544 | 0.036859 |
| TNRC6C            | ENSG00000078687 | 11058 | -0.26552 | 0.000161 | 0.006139 |
| TRAK1             | ENSG00000182606 | 10992 | -0.26519 | 0.001689 | 0.02336  |
| F2RL2             | ENSG00000164220 | 3429  | -0.26449 | 0.003926 | 0.039114 |
| RP11-24N18.1      | ENSG00000260570 | 295   | -0.26425 | 0.00326  | 0.03489  |
| AC007256.5        | ENSG00000213090 | 2765  | -0.264   | 0.002312 | 0.028228 |
| CYP4F12           | ENSG00000186204 | 5351  | -0.26384 | 0.002056 | 0.026499 |
| RP11-455O6.8      | ENSG00000276101 | 610   | -0.26322 | 0.00387  | 0.038751 |
| GATS              | ENSG00000239521 | 4860  | -0.26276 | 0.001136 | 0.018537 |
| FAM21A            | ENSG00000099290 | 5162  | -0.26249 | 0.000137 | 0.005622 |
| ZSWIM5            | ENSG00000162415 | 6046  | -0.26239 | 0.004094 | 0.040173 |
| RP11-395B7.7      | ENSG00000260336 | 3921  | -0.26239 | 0.000369 | 0.00978  |
| RP11-707P17.1     | ENSG00000259678 | 560   | -0.262   | 0.00028  | 0.008422 |
| RP11-1035H13.2    | ENSG00000260017 | 361   | -0.26159 | 1.05E-05 | 0.001391 |
| LY6G5B            | ENSG00000240053 | 3031  | -0.26072 | 0.001293 | 0.019886 |
| AC093818.1        | ENSG00000225205 | 2447  | -0.26067 | 0.000472 | 0.011228 |
| AC002543.2        | ENSG00000235945 | 1954  | -0.25995 | 0.003538 | 0.036851 |
| RP11-346D14.1     | ENSG00000259380 | 2982  | -0.25991 | 0.001563 | 0.022273 |
| XXbac-BPG154L12.4 | ENSG00000225914 | 3458  | -0.25945 | 0.001709 | 0.02356  |
| DSC2              | ENSG00000134755 | 12371 | -0.25902 | 0.004791 | 0.044059 |
| PCNT              | ENSG00000160299 | 11660 | -0.25873 | 1.43E-05 | 0.001653 |
| TPT1-AS1          | ENSG00000170919 | 10402 | -0.25844 | 0.000411 | 0.010339 |
| RP11-294J22.7     | ENSG00000278963 | 2151  | -0.25838 | 0.001912 | 0.025178 |
| DNHD1             | ENSG00000179532 | 19629 | -0.25832 | 0.00527  | 0.046938 |
| TRIM73            | ENSG00000178809 | 5544  | -0.25809 | 0.004099 | 0.040202 |
| ZNRF3             | ENSG00000183579 | 6968  | -0.25775 | 0.001725 | 0.023704 |
| BRD4              | ENSG00000141867 | 12093 | -0.25772 | 0.000102 | 0.004972 |
| MEF2D             | ENSG00000116604 | 6400  | -0.25751 | 0.000277 | 0.008365 |
| RP11-229D13.3     | ENSG00000280388 | 1987  | -0.25706 | 0.003146 | 0.034209 |

|               |                 |       |          |          |          |
|---------------|-----------------|-------|----------|----------|----------|
| HIC1          | ENSG00000177374 | 8108  | -0.25665 | 0.00489  | 0.044625 |
| KIAA1328      | ENSG00000150477 | 11127 | -0.2563  | 0.000524 | 0.01196  |
| SLC7A8        | ENSG00000092068 | 5991  | -0.25627 | 0.00076  | 0.014609 |
| SRCAP         | ENSG00000080603 | 15255 | -0.25621 | 0.000573 | 0.012604 |
| EHBP1L1       | ENSG00000173442 | 6705  | -0.25602 | 0.003582 | 0.03713  |
| EGLN1P1       | ENSG00000254779 | 762   | -0.25556 | 0.00499  | 0.045247 |
| TEX22         | ENSG00000226174 | 2837  | -0.25554 | 0.001029 | 0.017443 |
| RP3-521E19.2  | ENSG00000257494 | 751   | -0.25531 | 0.001894 | 0.025074 |
| C1RL-AS1      | ENSG00000205885 | 6094  | -0.25524 | 0.000594 | 0.012849 |
| TTC21A        | ENSG00000168026 | 7677  | -0.2552  | 0.004293 | 0.04137  |
| RP11-163E9.2  | ENSG00000239969 | 740   | -0.25491 | 0.00013  | 0.005521 |
| FAM193B       | ENSG00000146067 | 5804  | -0.25477 | 0.002904 | 0.032472 |
| CTD-2260A17.3 | ENSG00000272109 | 569   | -0.2544  | 0.004332 | 0.041534 |
| PIK3C2B       | ENSG00000133056 | 9414  | -0.25408 | 0.001074 | 0.018018 |
| RP11-627G18.1 | ENSG00000266283 | 770   | -0.25397 | 0.004171 | 0.040656 |
| LINC00674     | ENSG00000237854 | 734   | -0.25394 | 9.17E-05 | 0.00476  |
| PXN           | ENSG00000089159 | 7376  | -0.25356 | 0.004504 | 0.042503 |
| RP11-15I20.1  | ENSG00000272814 | 274   | -0.25355 | 0.003589 | 0.03713  |
| HIVEP1        | ENSG00000095951 | 10979 | -0.25311 | 3.3E-06  | 0.000739 |
| WASF2         | ENSG00000158195 | 5676  | -0.253   | 6.13E-06 | 0.001067 |
| FOXK1         | ENSG00000164916 | 13093 | -0.25255 | 0.000737 | 0.014375 |
| CTD-2369P2.12 | ENSG00000267303 | 1850  | -0.25251 | 0.002259 | 0.027841 |
| RP11-295I5.4  | ENSG00000275197 | 563   | -0.25245 | 0.005577 | 0.048363 |
| IQSEC2        | ENSG00000124313 | 6962  | -0.25198 | 0.00488  | 0.044594 |
| ATP2A1        | ENSG00000196296 | 4587  | -0.25196 | 0.002837 | 0.032114 |
| RP11-307E17.8 | ENSG00000232063 | 2162  | -0.25169 | 0.001509 | 0.021834 |
| MAOB          | ENSG00000069535 | 2891  | -0.25168 | 0.003583 | 0.03713  |
| EP300         | ENSG00000100393 | 9585  | -0.25137 | 3.41E-06 | 0.000753 |
| DLGAP4-AS1    | ENSG00000232907 | 2437  | -0.25048 | 0.000142 | 0.005755 |
| RP13-487P22.1 | ENSG00000261529 | 1603  | -0.25043 | 0.002869 | 0.032351 |
| DSP           | ENSG00000096696 | 10093 | -0.25025 | 0.000171 | 0.006394 |
| RP11-126O1.4  | ENSG00000267476 | 670   | -0.24994 | 0.003344 | 0.035524 |
| CCDC88C       | ENSG00000015133 | 12426 | -0.24959 | 0.000152 | 0.005969 |
| AL157871.2    | ENSG00000259052 | 206   | -0.24939 | 1.39E-05 | 0.001625 |
| LTBP3         | ENSG00000168056 | 10543 | -0.24919 | 0.002095 | 0.026732 |
| FBRS          | ENSG00000156860 | 7218  | -0.24908 | 0.00077  | 0.014749 |
| PLXDC2        | ENSG00000120594 | 12567 | -0.24896 | 0.004366 | 0.041736 |
| C12orf50      | ENSG00000165805 | 5609  | -0.24879 | 0.002575 | 0.030148 |
| RP11-259O2.3  | ENSG00000249731 | 560   | -0.2484  | 0.004563 | 0.042762 |
| ECHDC2        | ENSG00000121310 | 11572 | -0.24773 | 0.005442 | 0.047752 |
| RP11-499P20.2 | ENSG00000240291 | 1575  | -0.2468  | 0.002438 | 0.029176 |

|              |                 |       |          |          |          |
|--------------|-----------------|-------|----------|----------|----------|
| RP11-156P1.3 | ENSG00000262879 | 3348  | -0.24658 | 0.001147 | 0.018661 |
| FOXJ2        | ENSG00000065970 | 6296  | -0.24631 | 3.19E-06 | 0.000721 |
| TAF4         | ENSG00000130699 | 9808  | -0.246   | 8.01E-05 | 0.004442 |
| AC007743.1   | ENSG00000233251 | 3713  | -0.24581 | 0.005082 | 0.045871 |
| COBL         | ENSG00000106078 | 14304 | -0.24532 | 0.004146 | 0.040499 |
| CTB-58E17.9  | ENSG00000275665 | 563   | -0.24529 | 0.000268 | 0.00824  |
| AMPD2        | ENSG00000116337 | 6823  | -0.24498 | 0.003147 | 0.034212 |
| WASH2P       | ENSG00000146556 | 2958  | -0.24478 | 0.005533 | 0.048151 |
| AGER         | ENSG00000204305 | 2077  | -0.24464 | 0.002482 | 0.029505 |
| PROSER3      | ENSG00000167595 | 6327  | -0.24459 | 0.005097 | 0.045939 |
| TTC7A        | ENSG00000068724 | 6949  | -0.24449 | 0.003594 | 0.037149 |
| RGL4         | ENSG00000159496 | 4715  | -0.24336 | 0.00113  | 0.018506 |
| CALCOCO1     | ENSG00000012822 | 8898  | -0.24327 | 0.000294 | 0.008664 |
| RP11-242D8.1 | ENSG00000267002 | 1191  | -0.24314 | 0.002463 | 0.029312 |
| PLEKHG3      | ENSG00000126822 | 11910 | -0.24287 | 0.005489 | 0.047933 |
| NR6A1        | ENSG00000148200 | 7124  | -0.24258 | 0.003994 | 0.039584 |
| SYT2         | ENSG00000143858 | 7774  | -0.24226 | 0.004975 | 0.045177 |
| NFATC2       | ENSG00000101096 | 8286  | -0.24188 | 0.001682 | 0.023335 |
| ZYX          | ENSG00000159840 | 3482  | -0.24179 | 0.003941 | 0.039195 |
| POM121       | ENSG00000196313 | 9821  | -0.24141 | 0.000231 | 0.007647 |
| EXT1         | ENSG00000182197 | 8325  | -0.24126 | 1.88E-05 | 0.001953 |
| GAB2         | ENSG00000033327 | 6771  | -0.23968 | 8.06E-05 | 0.004442 |
| MLANA        | ENSG00000120215 | 3083  | -0.23941 | 0.004191 | 0.040763 |
| FNBP4        | ENSG00000109920 | 7596  | -0.23902 | 6.72E-06 | 0.001124 |
| UGDH-AS1     | ENSG00000249348 | 2787  | -0.23837 | 0.002571 | 0.030123 |
| TACC2        | ENSG00000138162 | 18835 | -0.23831 | 0.001873 | 0.024881 |
| FCAMR        | ENSG00000162897 | 3541  | -0.23831 | 0.005877 | 0.049963 |
| ANKMY1       | ENSG00000144504 | 11477 | -0.23791 | 0.001229 | 0.019394 |
| RAPGEF1      | ENSG00000107263 | 7127  | -0.23782 | 3.5E-05  | 0.002905 |
| TOX3         | ENSG00000103460 | 5031  | -0.23782 | 0.000717 | 0.014158 |
| LPAR5        | ENSG00000184574 | 3258  | -0.23761 | 0.000279 | 0.008399 |
| STAG3        | ENSG00000066923 | 8583  | -0.23737 | 0.003787 | 0.038272 |
| SAMD4B       | ENSG00000179134 | 8057  | -0.23731 | 0.000122 | 0.005346 |
| KIZ          | ENSG00000088970 | 5207  | -0.23724 | 0.001455 | 0.021349 |
| ELMSAN1      | ENSG00000156030 | 13484 | -0.23723 | 0.000622 | 0.013167 |
| CDC42BPB     | ENSG00000198752 | 7958  | -0.23665 | 0.000294 | 0.008664 |
| CD99P1       | ENSG00000223773 | 5921  | -0.23649 | 0.000543 | 0.012171 |
| AP000347.2   | ENSG00000272578 | 7012  | -0.23636 | 0.001696 | 0.02342  |
| VDR          | ENSG00000111424 | 5674  | -0.23595 | 9.39E-05 | 0.004783 |
| ZNF608       | ENSG00000168916 | 6922  | -0.23593 | 0.002147 | 0.027118 |
| PDZD2        | ENSG00000133401 | 15642 | -0.23575 | 0.002497 | 0.029647 |



|               |                 |       |          |          |          |
|---------------|-----------------|-------|----------|----------|----------|
| BRD1          | ENSG00000100425 | 5850  | -0.23571 | 3.73E-05 | 0.002942 |
| AC022384.1    | ENSG00000273665 | 87    | -0.23461 | 0.002147 | 0.027118 |
| RRN3P3        | ENSG00000257122 | 3366  | -0.23429 | 0.001259 | 0.019567 |
| EEF2K         | ENSG00000103319 | 8020  | -0.23373 | 0.001957 | 0.025483 |
| CTB-152G17.6  | ENSG00000272918 | 2646  | -0.23369 | 0.002081 | 0.026663 |
| TRIM56        | ENSG00000169871 | 3933  | -0.23313 | 0.000971 | 0.016885 |
| CTB-191K22.5  | ENSG00000267815 | 457   | -0.23276 | 0.004797 | 0.044081 |
| PIP5K1C       | ENSG00000186111 | 6694  | -0.23261 | 0.004534 | 0.042617 |
| BEND7         | ENSG00000165626 | 9815  | -0.23191 | 0.005801 | 0.049518 |
| FAM193A       | ENSG00000125386 | 6174  | -0.23104 | 6.91E-06 | 0.001124 |
| WIZ           | ENSG00000011451 | 7965  | -0.23079 | 0.004883 | 0.044594 |
| TBC1D17       | ENSG00000104946 | 4745  | -0.2307  | 0.002319 | 0.028271 |
| C10orf12      | ENSG00000155640 | 4929  | -0.22985 | 0.000101 | 0.004971 |
| PHLDB1        | ENSG00000019144 | 21722 | -0.22931 | 0.001622 | 0.022793 |
| PCBP2         | ENSG00000197111 | 7926  | -0.22861 | 0.000172 | 0.006425 |
| AC024560.3    | ENSG00000214135 | 3502  | -0.22843 | 0.000293 | 0.008664 |
| UTS2B         | ENSG00000188958 | 3850  | -0.22835 | 0.001553 | 0.022162 |
| SPEN          | ENSG00000065526 | 13294 | -0.22769 | 1.69E-05 | 0.001858 |
| RP4-635E18.8  | ENSG00000271895 | 870   | -0.22743 | 0.005659 | 0.048813 |
| DIP2A         | ENSG00000160305 | 13557 | -0.22684 | 0.000561 | 0.01241  |
| WDPCP         | ENSG00000143951 | 11776 | -0.22676 | 0.002807 | 0.031955 |
| POM121C       | ENSG00000272391 | 8767  | -0.22674 | 0.000589 | 0.012781 |
| MMRN2         | ENSG00000173269 | 5334  | -0.22671 | 0.005577 | 0.048363 |
| RP11-493P1.2  | ENSG00000258034 | 501   | -0.22655 | 0.00112  | 0.018442 |
| RP11-568K15.1 | ENSG00000242193 | 5564  | -0.22618 | 0.0012   | 0.019099 |
| PDXDC2P       | ENSG00000196696 | 6114  | -0.22586 | 0.001434 | 0.021212 |
| PLEKHH1       | ENSG00000054690 | 10817 | -0.2258  | 0.001568 | 0.022314 |
| KIAA1211L     | ENSG00000196872 | 4705  | -0.22574 | 0.003384 | 0.035834 |
| RP11-373L24.1 | ENSG00000267520 | 5702  | -0.22557 | 0.000811 | 0.015195 |
| AGFG2         | ENSG00000106351 | 5478  | -0.22538 | 0.002068 | 0.026558 |
| RAD51-AS1     | ENSG00000245849 | 1696  | -0.22518 | 0.003966 | 0.039389 |
| RP4-613B23.1  | ENSG00000230084 | 785   | -0.22509 | 0.002968 | 0.032931 |
| DAPK1         | ENSG00000196730 | 8907  | -0.22455 | 0.000821 | 0.015254 |
| DLGAP4        | ENSG00000080845 | 8789  | -0.22411 | 0.000439 | 0.010737 |
| RP11-927P21.5 | ENSG00000263647 | 492   | -0.22344 | 0.003141 | 0.034177 |
| RALGDS        | ENSG00000160271 | 7624  | -0.22333 | 0.003601 | 0.037183 |
| RPL32P3       | ENSG00000251474 | 4504  | -0.2232  | 0.001473 | 0.021565 |
| ZC3H4         | ENSG00000130749 | 6502  | -0.22319 | 0.000959 | 0.016775 |
| TRIM8         | ENSG00000171206 | 2916  | -0.22258 | 0.000148 | 0.005876 |
| NRBP2         | ENSG00000185189 | 4924  | -0.22251 | 0.004154 | 0.040567 |
| TET3          | ENSG00000187605 | 12271 | -0.22241 | 0.000127 | 0.005505 |

|                |                 |       |          |          |          |
|----------------|-----------------|-------|----------|----------|----------|
| NRIP2          | ENSG00000053702 | 2803  | -0.22238 | 0.004431 | 0.042152 |
| RP9P           | ENSG00000205763 | 1433  | -0.22195 | 0.004409 | 0.042036 |
| AAK1           | ENSG00000115977 | 24845 | -0.22175 | 0.002335 | 0.028399 |
| FAM222B        | ENSG00000173065 | 5514  | -0.22166 | 0.00073  | 0.014283 |
| CHERP          | ENSG00000085872 | 6113  | -0.22152 | 0.002304 | 0.028169 |
| MAP3K12        | ENSG00000139625 | 7971  | -0.22123 | 0.00112  | 0.018442 |
| RP1-41C23.2    | ENSG00000278977 | 768   | -0.2212  | 0.003916 | 0.03906  |
| GUSBP11        | ENSG00000228315 | 6550  | -0.22068 | 0.001766 | 0.024008 |
| TJAP1          | ENSG00000137221 | 6741  | -0.22066 | 0.005265 | 0.046916 |
| PAXBP1-AS1     | ENSG00000238197 | 4046  | -0.22062 | 0.002745 | 0.031391 |
| TNS3           | ENSG00000136205 | 11797 | -0.21968 | 0.002521 | 0.029831 |
| KLF5           | ENSG00000102554 | 3893  | -0.21958 | 0.000747 | 0.014464 |
| NCOA6          | ENSG00000198646 | 10564 | -0.21928 | 0.000587 | 0.012771 |
| TGFB1          | ENSG00000105329 | 3238  | -0.21919 | 0.000117 | 0.005271 |
| DIAPH2         | ENSG00000147202 | 9550  | -0.21897 | 0.000194 | 0.006868 |
| KIAA0226       | ENSG00000145016 | 8613  | -0.21695 | 0.0008   | 0.015119 |
| PRR26          | ENSG00000180525 | 4835  | -0.21692 | 0.000712 | 0.014085 |
| FOXP1          | ENSG00000114861 | 13628 | -0.2154  | 0.000246 | 0.007896 |
| RP11-1007O24.3 | ENSG00000261423 | 2713  | -0.21524 | 0.001186 | 0.018988 |
| MAML2          | ENSG00000184384 | 7109  | -0.21521 | 0.004982 | 0.045208 |
| IGF2BP2        | ENSG00000073792 | 4735  | -0.21466 | 0.000134 | 0.005613 |
| TCF3           | ENSG00000071564 | 6080  | -0.21465 | 0.003485 | 0.036524 |
| SLC22A23       | ENSG00000137266 | 8898  | -0.21439 | 0.001861 | 0.024805 |
| SMG6           | ENSG00000070366 | 10554 | -0.21432 | 5.83E-05 | 0.003767 |
| PRKACA         | ENSG00000072062 | 6144  | -0.21386 | 0.005456 | 0.047798 |
| BOD1L1         | ENSG00000038219 | 15860 | -0.2127  | 1.63E-05 | 0.001809 |
| BAZ2A          | ENSG00000076108 | 10918 | -0.21255 | 3.3E-05  | 0.002786 |
| MINK1          | ENSG00000141503 | 7817  | -0.21227 | 0.002878 | 0.032351 |
| RP11-603J24.7  | ENSG00000237493 | 604   | -0.21226 | 0.002888 | 0.032374 |
| AGAP1          | ENSG00000157985 | 13898 | -0.21223 | 0.001284 | 0.019798 |
| CFLAR-AS1      | ENSG00000226312 | 3166  | -0.212   | 0.000367 | 0.009751 |
| MIR6080        | ENSG00000215769 | 3038  | -0.21139 | 0.001256 | 0.019567 |
| BAGE2          | ENSG00000187172 | 4080  | -0.21138 | 0.002535 | 0.029867 |
| RP11-849H4.4   | ENSG00000251143 | 4233  | -0.21133 | 0.001913 | 0.025178 |
| CYTH1          | ENSG00000108669 | 7754  | -0.21118 | 0.000417 | 0.010423 |
| SGSM2          | ENSG00000141258 | 9771  | -0.21076 | 0.005693 | 0.048975 |
| ZNF516         | ENSG00000101493 | 8217  | -0.21035 | 0.001752 | 0.023933 |
| ZBTB20         | ENSG00000181722 | 8279  | -0.21029 | 0.002409 | 0.028944 |
| PPP1R3E        | ENSG00000235194 | 5548  | -0.20993 | 0.003134 | 0.034147 |
| GATA6          | ENSG00000141448 | 3945  | -0.2098  | 0.00203  | 0.026279 |
| PSMG4          | ENSG00000180822 | 10418 | -0.208   | 0.000313 | 0.008901 |

|               |                 |       |          |          |          |
|---------------|-----------------|-------|----------|----------|----------|
| APPL1         | ENSG00000157500 | 7033  | -0.20744 | 0.000361 | 0.009649 |
| EP400         | ENSG00000183495 | 18705 | -0.20728 | 0.00168  | 0.023323 |
| NEO1          | ENSG00000067141 | 8117  | -0.20552 | 0.004425 | 0.042107 |
| CLASRP        | ENSG00000104859 | 4931  | -0.20547 | 0.001353 | 0.020408 |
| HECTD4        | ENSG00000173064 | 21572 | -0.20539 | 0.000584 | 0.012728 |
| DMXL2         | ENSG00000104093 | 13807 | -0.20521 | 0.000892 | 0.016033 |
| SLC12A6       | ENSG00000140199 | 10056 | -0.20499 | 0.00012  | 0.005334 |
| STK35         | ENSG00000125834 | 7055  | -0.20466 | 0.000258 | 0.008078 |
| MIR1302-2     | ENSG00000227518 | 2923  | -0.20437 | 0.004295 | 0.041377 |
| AKAP17A       | ENSG00000197976 | 4075  | -0.20403 | 0.00215  | 0.027142 |
| KMT2A         | ENSG00000118058 | 21961 | -0.20381 | 0.000167 | 0.006285 |
| AC007283.5    | ENSG00000234431 | 445   | -0.20226 | 0.000821 | 0.015253 |
| HIVEP2        | ENSG00000010818 | 9774  | -0.2009  | 0.001146 | 0.018661 |
| MLLT4         | ENSG00000130396 | 13720 | -0.20047 | 0.000626 | 0.013207 |
| ING5          | ENSG00000168395 | 8200  | -0.20017 | 0.003719 | 0.037883 |
| RP11-977G19.5 | ENSG00000258199 | 403   | -0.20011 | 0.004221 | 0.040967 |
| MLLT1         | ENSG00000130382 | 4740  | -0.2001  | 0.001217 | 0.019274 |
| NBPF9         | ENSG00000269713 | 9046  | -0.19963 | 0.002681 | 0.03103  |
| DNMBP         | ENSG00000107554 | 7072  | -0.19948 | 0.001145 | 0.018652 |
| CUX1          | ENSG00000257923 | 17788 | -0.19938 | 0.000133 | 0.005604 |
| ATAT1         | ENSG00000137343 | 4035  | -0.19918 | 0.004144 | 0.040491 |
| SNRNP70       | ENSG00000104852 | 4684  | -0.19891 | 0.002749 | 0.031408 |
| RP4-781K5.2   | ENSG00000228830 | 693   | -0.19859 | 0.000436 | 0.010688 |
| RP11-73E17.2  | ENSG00000258738 | 2117  | -0.1984  | 0.001348 | 0.020377 |
| ATXN7L1       | ENSG00000146776 | 8295  | -0.19836 | 0.001129 | 0.018506 |
| RERE          | ENSG00000142599 | 11503 | -0.19766 | 0.00575  | 0.04927  |
| FAM21C        | ENSG00000172661 | 5732  | -0.19719 | 0.000378 | 0.009926 |
| CHD2          | ENSG00000279765 | 1506  | -0.19668 | 0.000102 | 0.004972 |
| CTDNEP1       | ENSG00000175826 | 2584  | -0.19662 | 0.003702 | 0.037765 |
| SCAF4         | ENSG00000156304 | 5901  | -0.19631 | 0.000399 | 0.010193 |
| SH3RF2        | ENSG00000156463 | 7232  | -0.19543 | 0.004055 | 0.039938 |
| OPHN1         | ENSG00000079482 | 8224  | -0.19439 | 0.001628 | 0.022839 |
| ARHGAP17      | ENSG00000140750 | 9879  | -0.19404 | 0.002335 | 0.028399 |
| BRPF3         | ENSG00000096070 | 6613  | -0.19382 | 0.003541 | 0.036851 |
| RREB1         | ENSG00000124782 | 17254 | -0.19373 | 0.000469 | 0.011181 |
| RIN2          | ENSG00000132669 | 5053  | -0.19348 | 0.001655 | 0.023098 |
| TET2          | ENSG00000168769 | 16474 | -0.19312 | 0.002203 | 0.027516 |
| RP11-793H13.8 | ENSG00000257379 | 1571  | -0.19293 | 9.16E-06 | 0.001298 |
| EEA1          | ENSG00000102189 | 10150 | -0.19285 | 0.004738 | 0.043836 |
| CFLAR         | ENSG00000003402 | 22529 | -0.19244 | 1.44E-05 | 0.001659 |
| KDM3A         | ENSG00000115548 | 13423 | -0.19243 | 0.003002 | 0.033226 |

|              |                 |       |          |          |          |
|--------------|-----------------|-------|----------|----------|----------|
| TJP2         | ENSG00000119139 | 7306  | -0.19173 | 0.004685 | 0.043512 |
| DNMBP-AS1    | ENSG00000227695 | 2336  | -0.19093 | 0.002114 | 0.02687  |
| MAGI3        | ENSG00000081026 | 8180  | -0.19088 | 0.002136 | 0.027063 |
| USP42        | ENSG00000106346 | 7072  | -0.19045 | 0.000204 | 0.00715  |
| AC139887.4   | ENSG00000233799 | 286   | -0.18989 | 0.005432 | 0.047734 |
| ZXDC         | ENSG00000070476 | 7357  | -0.18881 | 0.002235 | 0.027677 |
| PPP1R13B     | ENSG00000088808 | 9031  | -0.18849 | 0.002066 | 0.026558 |
| ZNF587       | ENSG00000198466 | 7350  | -0.18776 | 0.000635 | 0.013325 |
| CTBP1-AS2    | ENSG00000196810 | 7820  | -0.18657 | 0.003849 | 0.03861  |
| STIM2        | ENSG00000109689 | 6909  | -0.1856  | 0.004341 | 0.041581 |
| ZNF142       | ENSG00000115568 | 6994  | -0.18539 | 0.005131 | 0.046143 |
| ZNF814       | ENSG00000204514 | 12600 | -0.18462 | 0.003301 | 0.035168 |
| SYNJ2        | ENSG00000078269 | 9921  | -0.18413 | 0.000554 | 0.012276 |
| ZNF785       | ENSG00000197162 | 4952  | -0.18356 | 0.002883 | 0.032371 |
| MPRIP        | ENSG00000133030 | 18105 | -0.18321 | 0.003806 | 0.038409 |
| REL          | ENSG00000162924 | 11255 | -0.18318 | 0.003671 | 0.037619 |
| AFF1         | ENSG00000172493 | 10733 | -0.18286 | 0.001651 | 0.023078 |
| TBC1D2B      | ENSG00000167202 | 9763  | -0.1826  | 0.003114 | 0.034012 |
| R3HDM2       | ENSG00000179912 | 6039  | -0.18163 | 0.001463 | 0.021449 |
| GPATCH8      | ENSG00000186566 | 9442  | -0.18143 | 0.003551 | 0.036912 |
| NFAT5        | ENSG00000102908 | 16401 | -0.18141 | 0.005688 | 0.04895  |
| TJP1         | ENSG00000104067 | 11340 | -0.181   | 0.00346  | 0.036342 |
| ZNF621       | ENSG00000172888 | 8354  | -0.18043 | 0.000893 | 0.016045 |
| SMARCC2      | ENSG00000139613 | 8555  | -0.18012 | 3.74E-05 | 0.002942 |
| DAZAP1       | ENSG00000071626 | 9201  | -0.17912 | 0.002083 | 0.026676 |
| RP11-158M2.2 | ENSG00000259544 | 569   | -0.17893 | 0.002339 | 0.028434 |
| SETD5        | ENSG00000168137 | 10808 | -0.17883 | 0.000369 | 0.00978  |
| BCOR         | ENSG00000183337 | 8544  | -0.17876 | 0.005475 | 0.047906 |
| SMG1         | ENSG00000157106 | 25988 | -0.17861 | 0.00011  | 0.005088 |
| ZNF169       | ENSG00000175787 | 5286  | -0.17847 | 0.002104 | 0.026787 |
| ERICH1       | ENSG00000104714 | 9726  | -0.17733 | 0.004688 | 0.043524 |
| WNK1         | ENSG00000060237 | 14370 | -0.17649 | 0.000509 | 0.011785 |
| STX16-NPEPL1 | ENSG00000254995 | 3859  | -0.17637 | 0.003321 | 0.035327 |
| ATXN2        | ENSG00000204842 | 13933 | -0.17631 | 0.001383 | 0.020644 |
| SMG7         | ENSG00000116698 | 8317  | -0.17622 | 0.002023 | 0.026236 |
| GSE1         | ENSG00000131149 | 10173 | -0.17586 | 0.001618 | 0.022793 |
| AHSA2        | ENSG00000173209 | 8382  | -0.1757  | 0.000214 | 0.007294 |
| AKAP8L       | ENSG00000011243 | 5081  | -0.17436 | 0.001619 | 0.022793 |
| C11orf49     | ENSG00000149179 | 6693  | -0.17282 | 0.003964 | 0.039383 |
| SSBP3        | ENSG00000157216 | 5227  | -0.17247 | 0.002585 | 0.030224 |
| LARP1        | ENSG00000155506 | 8492  | -0.17246 | 0.000311 | 0.008861 |

|                |                 |       |          |          |          |
|----------------|-----------------|-------|----------|----------|----------|
| SETD8          | ENSG00000183955 | 4579  | -0.17194 | 0.00214  | 0.027075 |
| FAM63B         | ENSG00000128923 | 9454  | -0.1717  | 0.001122 | 0.01845  |
| SVIL           | ENSG00000197321 | 9937  | -0.17142 | 0.00086  | 0.015677 |
| KIAA2026       | ENSG00000183354 | 7930  | -0.17074 | 0.000819 | 0.015231 |
| CTD-2647L4.5   | ENSG00000259607 | 585   | -0.17016 | 0.003692 | 0.037725 |
| AC004893.11    | ENSG00000242687 | 4194  | -0.16991 | 0.00303  | 0.033442 |
| KLC1           | ENSG00000126214 | 19251 | -0.16939 | 0.003077 | 0.033748 |
| AGO2           | ENSG00000123908 | 4824  | -0.16889 | 0.000746 | 0.014464 |
| CREB3L2        | ENSG00000182158 | 8788  | -0.16842 | 0.002709 | 0.031252 |
| ZNF767P        | ENSG00000133624 | 4012  | -0.16813 | 0.004641 | 0.043218 |
| ATXN7          | ENSG00000163635 | 9172  | -0.16801 | 0.001339 | 0.020299 |
| SAFB2          | ENSG00000130254 | 6222  | -0.16768 | 8.49E-05 | 0.004544 |
| ARID1B         | ENSG00000049618 | 16334 | -0.16757 | 0.002865 | 0.032315 |
| SF1            | ENSG00000168066 | 5972  | -0.16743 | 0.000417 | 0.010418 |
| CEP350         | ENSG00000135837 | 14301 | -0.16648 | 0.003983 | 0.039503 |
| CRIM1          | ENSG00000150938 | 7122  | -0.16647 | 0.004495 | 0.042497 |
| ZBTB4          | ENSG00000174282 | 6026  | -0.16564 | 0.001671 | 0.023235 |
| HMBOX1         | ENSG00000147421 | 6634  | -0.16522 | 0.000321 | 0.009043 |
| AC083884.8     | ENSG00000232729 | 2847  | -0.16484 | 0.002767 | 0.031581 |
| GLG1           | ENSG00000260539 | 2466  | -0.16478 | 0.003353 | 0.035557 |
| PRRC2C         | ENSG00000117523 | 13921 | -0.16458 | 0.00166  | 0.023132 |
| MAML1          | ENSG00000161021 | 10690 | -0.16454 | 0.000791 | 0.015041 |
| MACF1          | ENSG00000127603 | 43102 | -0.16451 | 0.000656 | 0.013567 |
| NKTR           | ENSG00000114857 | 17356 | -0.16449 | 0.001175 | 0.018886 |
| SYMPK          | ENSG00000125755 | 10628 | -0.16337 | 0.004264 | 0.041215 |
| DUSP28         | ENSG00000188542 | 3709  | -0.16259 | 0.003543 | 0.036858 |
| LRCH1          | ENSG00000136141 | 7307  | -0.16248 | 0.004498 | 0.042497 |
| NFATC2IP       | ENSG00000176953 | 5738  | -0.16108 | 0.000712 | 0.014085 |
| PRRC2B         | ENSG00000130723 | 12293 | -0.16086 | 0.005462 | 0.047818 |
| AGO4           | ENSG00000134698 | 7267  | -0.16057 | 0.000803 | 0.015146 |
| KMT2E          | ENSG00000005483 | 9233  | -0.16038 | 0.003124 | 0.034071 |
| C17orf85       | ENSG00000074356 | 5360  | -0.16033 | 0.000101 | 0.004971 |
| KMT2C          | ENSG00000055609 | 20114 | -0.15746 | 0.000787 | 0.014988 |
| PHLPP1         | ENSG00000081913 | 9142  | -0.1571  | 0.005795 | 0.0495   |
| RP11-247I13.11 | ENSG00000240591 | 788   | -0.15662 | 0.00354  | 0.036851 |
| PATL1          | ENSG00000166889 | 4278  | -0.15623 | 0.005749 | 0.04927  |
| FYCO1          | ENSG00000163820 | 8895  | -0.15394 | 0.005169 | 0.046399 |
| SFSWAP         | ENSG00000061936 | 10157 | -0.15267 | 0.000406 | 0.010306 |
| KIF1B          | ENSG00000054523 | 17693 | -0.15181 | 0.00109  | 0.018145 |
| TNRC6A         | ENSG00000090905 | 12522 | -0.15114 | 0.001955 | 0.025466 |
| TRIO           | ENSG00000038382 | 17500 | -0.15096 | 0.005501 | 0.047994 |

|              |                 |       |          |          |          |
|--------------|-----------------|-------|----------|----------|----------|
| RBM6         | ENSG00000004534 | 7302  | -0.15029 | 0.001222 | 0.019323 |
| GTF2I        | ENSG00000263001 | 10438 | -0.15013 | 0.001473 | 0.021565 |
| SP1          | ENSG00000185591 | 8083  | -0.14908 | 0.000571 | 0.012577 |
| SUGP2        | ENSG00000064607 | 7744  | -0.14895 | 0.005423 | 0.047709 |
| UBE2H        | ENSG00000186591 | 6392  | -0.14771 | 0.000811 | 0.015195 |
| RBM33        | ENSG00000184863 | 13132 | -0.14755 | 0.003587 | 0.03713  |
| TRRAP        | ENSG00000196367 | 13218 | -0.1475  | 0.004593 | 0.042883 |
| STRN         | ENSG00000115808 | 8345  | -0.14713 | 0.004266 | 0.041215 |
| ORAOV1       | ENSG00000149716 | 7872  | -0.14684 | 0.002966 | 0.032931 |
| RALGAPB      | ENSG00000170471 | 12624 | -0.14676 | 0.001128 | 0.0185   |
| AKAP1        | ENSG00000121057 | 5399  | -0.14609 | 0.005161 | 0.046354 |
| EZH1         | ENSG00000108799 | 6988  | -0.14545 | 0.000913 | 0.016328 |
| PARD3B       | ENSG00000116117 | 10382 | -0.14343 | 0.00465  | 0.04327  |
| SAP130       | ENSG00000136715 | 4373  | -0.14256 | 0.002166 | 0.027253 |
| MAP4         | ENSG00000047849 | 14896 | -0.14251 | 0.000617 | 0.013099 |
| RC3H1        | ENSG00000135870 | 11508 | -0.14191 | 0.000993 | 0.017057 |
| UBN1         | ENSG00000118900 | 8551  | -0.1403  | 0.002206 | 0.027538 |
| NPEPPS       | ENSG00000141279 | 11514 | -0.14026 | 0.002414 | 0.028975 |
| ARHGEF7      | ENSG00000102606 | 11768 | -0.13973 | 0.002922 | 0.032614 |
| CSNK2A2      | ENSG00000070770 | 6905  | -0.13968 | 0.000245 | 0.007896 |
| IKBKB        | ENSG00000104365 | 10239 | -0.13878 | 0.000785 | 0.014959 |
| KDM2A        | ENSG00000173120 | 10380 | -0.13516 | 0.000338 | 0.009337 |
| ZBTB40       | ENSG00000184677 | 8992  | -0.13482 | 0.001881 | 0.02496  |
| IRF2BP2      | ENSG00000168264 | 4724  | -0.13438 | 0.004325 | 0.041522 |
| RP4-761J14.8 | ENSG00000219410 | 2399  | -0.1339  | 0.003185 | 0.034436 |
| SRPK2        | ENSG00000135250 | 6341  | -0.13158 | 0.00284  | 0.032141 |
| ANKZF1       | ENSG00000163516 | 6119  | -0.13127 | 0.005571 | 0.048353 |
| CTTNBP2NL    | ENSG00000143079 | 7404  | -0.13086 | 0.003324 | 0.035339 |
| DIDO1        | ENSG00000101191 | 13281 | -0.12896 | 0.002347 | 0.028525 |
| HNRNPUL1     | ENSG00000105323 | 6543  | -0.12865 | 0.000382 | 0.009964 |
| TCF20        | ENSG00000100207 | 7548  | -0.12605 | 0.000798 | 0.015084 |
| PPP2R2D      | ENSG00000175470 | 7756  | -0.12533 | 0.001442 | 0.021273 |
| ZNF384       | ENSG00000126746 | 5181  | -0.1249  | 0.003389 | 0.035873 |
| ARHGEF12     | ENSG00000196914 | 24404 | -0.12416 | 0.002533 | 0.029855 |
| MECP2        | ENSG00000169057 | 12556 | -0.12318 | 0.003428 | 0.036143 |
| ETV6         | ENSG00000139083 | 7075  | -0.123   | 0.004301 | 0.041395 |
| ZSCAN29      | ENSG00000140265 | 6634  | -0.12123 | 0.001792 | 0.024225 |
| YY1          | ENSG00000100811 | 8720  | -0.12006 | 0.003788 | 0.038272 |
| SF3A1        | ENSG00000099995 | 6329  | -0.11863 | 0.002168 | 0.027261 |
| ACIN1        | ENSG00000100813 | 9110  | -0.11651 | 0.000877 | 0.015873 |
| TMEM131      | ENSG00000075568 | 12985 | -0.11602 | 0.003432 | 0.036144 |

|             |                 |       |          |          |          |
|-------------|-----------------|-------|----------|----------|----------|
| CPSF7       | ENSG00000149532 | 6036  | -0.11261 | 0.003951 | 0.039282 |
| ADD1        | ENSG00000087274 | 13106 | -0.11128 | 0.003638 | 0.037431 |
| CDK13       | ENSG00000065883 | 8921  | -0.11102 | 0.000285 | 0.008535 |
| CDK12       | ENSG00000167258 | 12773 | -0.1065  | 0.001012 | 0.017266 |
| MARK3       | ENSG00000075413 | 8891  | -0.10309 | 0.000947 | 0.016648 |
| KDM3B       | ENSG00000120733 | 7961  | -0.09509 | 0.002224 | 0.027667 |
| HERC3       | ENSG00000138641 | 8634  | 0.108552 | 0.001441 | 0.021273 |
| UBR1        | ENSG00000159459 | 9928  | 0.119334 | 0.005116 | 0.046071 |
| IKBKAP      | ENSG00000070061 | 6048  | 0.120166 | 0.005459 | 0.047809 |
| ATP2C1      | ENSG00000017260 | 8533  | 0.120612 | 0.00087  | 0.01583  |
| RHBDD1      | ENSG00000144468 | 6926  | 0.121893 | 0.004413 | 0.042036 |
| SF3B3       | ENSG00000189091 | 12419 | 0.124496 | 0.002139 | 0.027075 |
| ZNF780A     | ENSG00000197782 | 7972  | 0.126435 | 0.005259 | 0.046915 |
| SMU1        | ENSG00000122692 | 7122  | 0.128415 | 0.004435 | 0.042152 |
| C11orf58    | ENSG00000110696 | 8675  | 0.130141 | 0.004854 | 0.044398 |
| TASP1       | ENSG00000089123 | 2905  | 0.132446 | 0.002819 | 0.03202  |
| SPOP        | ENSG00000121067 | 6380  | 0.134158 | 0.002307 | 0.028178 |
| SACM1L      | ENSG00000211456 | 7352  | 0.134219 | 0.004842 | 0.044354 |
| HELQ        | ENSG00000163312 | 3713  | 0.138989 | 0.003736 | 0.037967 |
| STAG1       | ENSG00000118007 | 7846  | 0.139059 | 0.001415 | 0.021029 |
| ZNHIT3      | ENSG00000273611 | 6687  | 0.139739 | 0.00309  | 0.033878 |
| CHMP3       | ENSG00000115561 | 7183  | 0.140256 | 0.004101 | 0.040204 |
| CHURC1-FNTB | ENSG00000125954 | 2076  | 0.143626 | 0.005357 | 0.047356 |
| COPS5       | ENSG00000121022 | 7779  | 0.143851 | 0.001948 | 0.025431 |
| RPA1        | ENSG00000132383 | 5492  | 0.144161 | 0.000431 | 0.010606 |
| KLHL12      | ENSG00000117153 | 3552  | 0.144849 | 0.003413 | 0.036043 |
| DHX15       | ENSG00000109606 | 8162  | 0.144906 | 0.004818 | 0.044191 |
| ERVK3-1     | ENSG00000142396 | 5023  | 0.145982 | 0.003153 | 0.034261 |
| NDUFAF5     | ENSG00000101247 | 7217  | 0.146024 | 0.001587 | 0.022488 |
| AL136419.6  | ENSG00000260669 | 3045  | 0.146337 | 0.003582 | 0.03713  |
| ALG9        | ENSG00000086848 | 8013  | 0.146675 | 0.001639 | 0.022974 |
| SKP1        | ENSG00000113558 | 12771 | 0.146937 | 0.004706 | 0.043626 |
| EED         | ENSG00000074266 | 7016  | 0.147147 | 0.000849 | 0.015523 |
| RAD1        | ENSG00000113456 | 6763  | 0.147175 | 0.002097 | 0.026732 |
| ZNF200      | ENSG00000010539 | 7498  | 0.147372 | 0.004208 | 0.040873 |
| UBA6-AS1    | ENSG00000248049 | 5575  | 0.148179 | 0.005121 | 0.046083 |
| RBM23       | ENSG00000100461 | 6583  | 0.148203 | 0.001004 | 0.017189 |
| SMIM4       | ENSG00000168273 | 2482  | 0.148286 | 0.003816 | 0.038438 |
| PPIP5K2     | ENSG00000145725 | 17270 | 0.148711 | 0.001975 | 0.025674 |
| TMEM183A    | ENSG00000163444 | 4026  | 0.148914 | 0.003997 | 0.039592 |
| SRRD        | ENSG00000100104 | 4319  | 0.14915  | 0.003788 | 0.038272 |

|              |                 |       |          |          |          |
|--------------|-----------------|-------|----------|----------|----------|
| RP11-176H8.1 | ENSG00000203546 | 4422  | 0.149297 | 0.00464  | 0.043218 |
| TM2D3        | ENSG00000184277 | 11894 | 0.150327 | 0.002747 | 0.0314   |
| ASCC3        | ENSG00000112249 | 11731 | 0.150452 | 0.005375 | 0.047464 |
| RNGTT        | ENSG00000111880 | 4797  | 0.1508   | 0.002836 | 0.032114 |
| MFAP3        | ENSG00000037749 | 4792  | 0.151239 | 0.004594 | 0.042883 |
| CCNT1        | ENSG00000129315 | 7371  | 0.153646 | 0.000958 | 0.016763 |
| PDHA1        | ENSG00000131828 | 4493  | 0.154233 | 0.005767 | 0.049322 |
| YARS2        | ENSG00000139131 | 2152  | 0.15509  | 0.00424  | 0.041081 |
| DDX1         | ENSG00000079785 | 3833  | 0.155606 | 0.002646 | 0.030718 |
| MKKS         | ENSG00000125863 | 6953  | 0.155772 | 0.003675 | 0.037619 |
| CNIH1        | ENSG00000100528 | 5060  | 0.156367 | 0.005298 | 0.047087 |
| RNF146       | ENSG00000118518 | 3508  | 0.156488 | 0.001015 | 0.017294 |
| PSMC1        | ENSG00000100764 | 6161  | 0.157242 | 0.001763 | 0.024003 |
| ENOX2        | ENSG00000165675 | 4279  | 0.157643 | 0.002443 | 0.029193 |
| PGM2         | ENSG00000169299 | 3704  | 0.15821  | 0.004921 | 0.044845 |
| RPE          | ENSG00000197713 | 3522  | 0.158813 | 0.002456 | 0.029279 |
| DERL1        | ENSG00000136986 | 7081  | 0.159503 | 0.00135  | 0.020377 |
| DARS2        | ENSG00000117593 | 3689  | 0.160673 | 0.002896 | 0.032426 |
| SDHC         | ENSG00000143252 | 14160 | 0.160758 | 0.00274  | 0.031391 |
| NUP107       | ENSG00000111581 | 8320  | 0.161748 | 0.005033 | 0.045525 |
| RP11-512M8.5 | ENSG00000256861 | 2748  | 0.161757 | 0.003701 | 0.037765 |
| UBR7         | ENSG00000012963 | 3694  | 0.162199 | 0.002565 | 0.030063 |
| ERP29        | ENSG00000089248 | 3083  | 0.162327 | 0.005526 | 0.048101 |
| LARP4        | ENSG00000161813 | 8112  | 0.163071 | 0.002235 | 0.027677 |
| MTPN         | ENSG00000105887 | 3775  | 0.163227 | 0.002909 | 0.032499 |
| UNC50        | ENSG00000115446 | 2230  | 0.163523 | 0.001911 | 0.025178 |
| KLHL9        | ENSG00000198642 | 5710  | 0.163569 | 0.000457 | 0.011008 |
| NUP205       | ENSG00000155561 | 7619  | 0.16357  | 0.001455 | 0.021349 |
| CAND1        | ENSG00000111530 | 13655 | 0.163798 | 0.000625 | 0.013191 |
| UXS1         | ENSG00000115652 | 7023  | 0.164198 | 0.004054 | 0.039938 |
| AIMP1        | ENSG00000164022 | 3328  | 0.164309 | 0.004479 | 0.042402 |
| LARS         | ENSG00000133706 | 8118  | 0.16433  | 0.004453 | 0.042276 |
| DPY19L1P1    | ENSG00000229358 | 2594  | 0.164349 | 0.001939 | 0.025399 |
| SLC37A3      | ENSG00000157800 | 10588 | 0.165009 | 0.002266 | 0.027865 |
| DIABLO       | ENSG00000184047 | 5967  | 0.165225 | 0.005646 | 0.048755 |
| PEX12        | ENSG00000108733 | 2861  | 0.165251 | 0.004948 | 0.04503  |
| ZCCHC4       | ENSG00000168228 | 4400  | 0.165419 | 0.002501 | 0.029681 |
| SLC18B1      | ENSG00000146409 | 2444  | 0.16555  | 0.001859 | 0.024805 |
| INTS7        | ENSG00000143493 | 5311  | 0.165779 | 0.001261 | 0.019567 |
| PIK3R4       | ENSG00000196455 | 5376  | 0.165796 | 0.000342 | 0.009389 |
| C14orf119    | ENSG00000179933 | 3676  | 0.1658   | 0.005602 | 0.048489 |



|               |                 |       |          |          |          |
|---------------|-----------------|-------|----------|----------|----------|
| NUP54         | ENSG00000138750 | 4062  | 0.166083 | 0.004503 | 0.042503 |
| RBM45         | ENSG00000155636 | 4784  | 0.166288 | 0.000305 | 0.008781 |
| YME1L1        | ENSG00000136758 | 7335  | 0.166397 | 0.004588 | 0.042883 |
| SCO1          | ENSG00000133028 | 10230 | 0.166451 | 0.003222 | 0.034691 |
| RAB28         | ENSG00000157869 | 2221  | 0.167124 | 0.001334 | 0.020271 |
| WDR92         | ENSG00000243667 | 4079  | 0.167228 | 0.005134 | 0.046148 |
| KANSL2        | ENSG00000139620 | 3386  | 0.167991 | 0.000675 | 0.013717 |
| DDX18         | ENSG00000088205 | 7851  | 0.168073 | 0.00381  | 0.038429 |
| UBA5          | ENSG00000081307 | 6827  | 0.168247 | 0.001079 | 0.018056 |
| ARFIP1        | ENSG00000164144 | 4290  | 0.168415 | 0.005413 | 0.047676 |
| UROS          | ENSG00000188690 | 6643  | 0.168642 | 0.004434 | 0.042152 |
| CTC-454I21.3  | ENSG00000267360 | 1654  | 0.169259 | 0.005551 | 0.048242 |
| TMEM39A       | ENSG00000176142 | 5333  | 0.16952  | 0.003419 | 0.036088 |
| NUDT15        | ENSG00000136159 | 2098  | 0.16956  | 0.004263 | 0.041215 |
| ZNF230        | ENSG00000159882 | 6298  | 0.169708 | 0.004044 | 0.039884 |
| PARL          | ENSG00000175193 | 2034  | 0.169786 | 0.002091 | 0.026712 |
| TBC1D31       | ENSG00000156787 | 8611  | 0.170278 | 0.001035 | 0.017479 |
| POLB          | ENSG00000070501 | 4106  | 0.170593 | 0.003442 | 0.03619  |
| ZW10          | ENSG00000086827 | 2992  | 0.170704 | 0.003111 | 0.034012 |
| GTF2F2        | ENSG00000188342 | 3619  | 0.170893 | 0.005719 | 0.049118 |
| TMEM242       | ENSG00000215712 | 4644  | 0.171181 | 0.00124  | 0.019434 |
| FUNDC2        | ENSG00000165775 | 10252 | 0.17121  | 0.001499 | 0.021728 |
| DAP3          | ENSG00000132676 | 4588  | 0.171288 | 0.002262 | 0.027841 |
| MLH1          | ENSG00000076242 | 3532  | 0.171314 | 0.001199 | 0.019091 |
| COIL          | ENSG00000121058 | 3030  | 0.171696 | 0.000939 | 0.016565 |
| PEX19         | ENSG00000162735 | 4461  | 0.171881 | 0.001359 | 0.020425 |
| RP11-894J14.5 | ENSG00000272305 | 1760  | 0.172022 | 0.005244 | 0.046852 |
| ENSA          | ENSG00000143420 | 5493  | 0.172327 | 0.000208 | 0.007222 |
| DHX9          | ENSG00000135829 | 5645  | 0.172368 | 0.000977 | 0.016916 |
| GDAP1         | ENSG00000104381 | 4052  | 0.172431 | 0.002886 | 0.032374 |
| HSPA14        | ENSG00000187522 | 4818  | 0.172437 | 0.000227 | 0.007589 |
| RBM18         | ENSG00000119446 | 5193  | 0.172461 | 0.003232 | 0.034723 |
| SPTLC1        | ENSG00000090054 | 3658  | 0.172523 | 0.004504 | 0.042503 |
| TIMM10B       | ENSG00000132286 | 3041  | 0.172719 | 0.002784 | 0.031721 |
| NUPL1         | ENSG00000139496 | 10422 | 0.173233 | 0.00317  | 0.034387 |
| CMC2          | ENSG00000103121 | 12781 | 0.173343 | 0.000525 | 0.01198  |
| RP11-762I7.5  | ENSG00000257390 | 2534  | 0.173691 | 0.002332 | 0.028384 |
| PRICKLE4      | ENSG00000124593 | 4479  | 0.173958 | 0.001017 | 0.017296 |
| SYPL1         | ENSG00000008282 | 2794  | 0.174358 | 0.004216 | 0.040934 |
| MPV17         | ENSG00000115204 | 5625  | 0.174976 | 0.004519 | 0.042544 |
| RBM8A         | ENSG00000265241 | 5241  | 0.175004 | 0.001904 | 0.02512  |

|               |                 |       |          |          |          |
|---------------|-----------------|-------|----------|----------|----------|
| TDG           | ENSG00000139372 | 4903  | 0.175038 | 0.003641 | 0.037431 |
| RABGGTB       | ENSG00000137955 | 5913  | 0.175733 | 0.000918 | 0.016367 |
| CMTR2         | ENSG00000180917 | 7582  | 0.175941 | 0.004693 | 0.043546 |
| TMEM223       | ENSG00000168569 | 2280  | 0.176134 | 0.003098 | 0.033913 |
| SRPK1         | ENSG00000096063 | 6692  | 0.176184 | 0.001834 | 0.024589 |
| TMEM30A       | ENSG00000112697 | 5123  | 0.176386 | 0.002928 | 0.032662 |
| ANAPC7        | ENSG00000196510 | 6009  | 0.176648 | 0.0003   | 0.008696 |
| SDHAF2        | ENSG00000167985 | 2492  | 0.176753 | 0.000577 | 0.012663 |
| RP5-1180E21.5 | ENSG00000273221 | 647   | 0.176822 | 0.003106 | 0.033964 |
| ORC5          | ENSG00000164815 | 3724  | 0.177275 | 0.001208 | 0.019167 |
| TMEM50B       | ENSG00000142188 | 4495  | 0.177853 | 0.001216 | 0.019269 |
| CHUK          | ENSG00000213341 | 6928  | 0.177998 | 0.003508 | 0.036679 |
| EEF1D         | ENSG00000104529 | 9390  | 0.178086 | 0.004561 | 0.042762 |
| COMMD9        | ENSG00000110442 | 6592  | 0.178495 | 0.002402 | 0.028888 |
| RTFDC1        | ENSG00000022277 | 4063  | 0.179053 | 0.000829 | 0.015324 |
| SLC25A17      | ENSG00000100372 | 3989  | 0.17913  | 0.001165 | 0.018836 |
| TMEM167B      | ENSG00000215717 | 4574  | 0.179148 | 0.003789 | 0.038272 |
| APOLD1        | ENSG00000178878 | 7243  | 0.179354 | 0.002968 | 0.032931 |
| BRK1          | ENSG00000254999 | 1233  | 0.179419 | 0.003072 | 0.033706 |
| ANP32A        | ENSG00000140350 | 7544  | 0.179704 | 0.002879 | 0.032351 |
| ZC3HC1        | ENSG00000091732 | 3011  | 0.179769 | 0.004524 | 0.04256  |
| SNRPD3        | ENSG00000100028 | 2544  | 0.180487 | 0.001361 | 0.020437 |
| ATP10D        | ENSG00000145246 | 7965  | 0.180916 | 0.001488 | 0.021654 |
| TMED10        | ENSG00000170348 | 4974  | 0.180945 | 0.00337  | 0.035698 |
| MALSU1        | ENSG00000156928 | 3851  | 0.1812   | 0.000878 | 0.015873 |
| KARS          | ENSG00000065427 | 4065  | 0.181243 | 0.001785 | 0.024171 |
| USP46         | ENSG00000109189 | 8917  | 0.181326 | 0.000401 | 0.010237 |
| ACTR6         | ENSG00000075089 | 3813  | 0.181405 | 0.005003 | 0.045352 |
| MTO1          | ENSG00000135297 | 12071 | 0.181517 | 0.00585  | 0.049804 |
| UAP1          | ENSG00000117143 | 3437  | 0.181844 | 0.002263 | 0.027841 |
| RFT1          | ENSG00000163933 | 5488  | 0.182015 | 0.000475 | 0.011267 |
| ADSS          | ENSG00000035687 | 3666  | 0.182125 | 0.005748 | 0.04927  |
| MFSD1         | ENSG00000118855 | 5288  | 0.182173 | 0.00021  | 0.007234 |
| PPA2          | ENSG00000138777 | 4654  | 0.182279 | 0.003773 | 0.038204 |
| RUVBL1        | ENSG00000175792 | 6860  | 0.182399 | 0.005522 | 0.048089 |
| APTX          | ENSG00000137074 | 3789  | 0.182478 | 0.00024  | 0.007839 |
| C8orf33       | ENSG00000182307 | 3378  | 0.182571 | 0.005344 | 0.047319 |
| COMMD10       | ENSG00000145781 | 2464  | 0.183336 | 0.001124 | 0.018464 |
| MRFAP1L1      | ENSG00000178988 | 2180  | 0.183598 | 0.000153 | 0.005998 |
| TMEM179B      | ENSG00000185475 | 1496  | 0.183707 | 0.002559 | 0.030015 |
| PTRH2         | ENSG00000141378 | 4740  | 0.183753 | 0.000167 | 0.006285 |

|               |                 |      |          |          |          |
|---------------|-----------------|------|----------|----------|----------|
| MRPS18C       | ENSG00000163319 | 4866 | 0.184028 | 0.004507 | 0.042503 |
| AASDHPPT      | ENSG00000149313 | 6183 | 0.18428  | 0.000946 | 0.01664  |
| MOB4          | ENSG00000115540 | 4296 | 0.184344 | 0.004685 | 0.043512 |
| PRKAG1        | ENSG00000181929 | 4556 | 0.184366 | 0.002441 | 0.029183 |
| GPN1          | ENSG00000198522 | 3746 | 0.184411 | 8.1E-05  | 0.004446 |
| NIPSNAP3A     | ENSG00000136783 | 2585 | 0.184773 | 0.003824 | 0.038482 |
| APITD1        | ENSG00000175279 | 1739 | 0.184817 | 0.003208 | 0.034581 |
| CLPTM1L       | ENSG00000049656 | 6557 | 0.185657 | 0.00087  | 0.01583  |
| CTC-498J12.3  | ENSG00000248664 | 946  | 0.185864 | 0.001803 | 0.024323 |
| ITGB3BP       | ENSG00000142856 | 5459 | 0.185956 | 0.000564 | 0.012466 |
| UFC1          | ENSG00000143222 | 2274 | 0.18641  | 0.002434 | 0.029152 |
| MIR3654       | ENSG00000255508 | 5197 | 0.186691 | 0.003283 | 0.035049 |
| PTGES3        | ENSG00000110958 | 3399 | 0.187093 | 5.74E-05 | 0.00374  |
| TM9SF1        | ENSG00000254692 | 2740 | 0.187115 | 0.002188 | 0.027401 |
| RAD17         | ENSG00000152942 | 4159 | 0.187188 | 0.001678 | 0.023306 |
| EEF1G         | ENSG00000254772 | 2716 | 0.187482 | 0.003347 | 0.035524 |
| NPRL2         | ENSG00000114388 | 3677 | 0.187555 | 0.003985 | 0.039503 |
| NOL11         | ENSG00000130935 | 4713 | 0.187792 | 0.002735 | 0.031391 |
| ARL14EP       | ENSG00000152219 | 5465 | 0.187943 | 0.005757 | 0.049296 |
| MRPS22        | ENSG00000175110 | 5382 | 0.187956 | 0.002782 | 0.031705 |
| MED18         | ENSG00000130772 | 2019 | 0.188092 | 0.003609 | 0.037219 |
| SRP54         | ENSG00000100883 | 3899 | 0.188199 | 0.005433 | 0.047734 |
| PDHX          | ENSG00000110435 | 3760 | 0.188282 | 0.004514 | 0.042518 |
| NECAP1        | ENSG00000089818 | 4155 | 0.188324 | 0.005844 | 0.049804 |
| TMEM87A       | ENSG00000103978 | 5668 | 0.188684 | 4.15E-05 | 0.003099 |
| RP4-769N13.7  | ENSG00000270050 | 387  | 0.188706 | 0.002449 | 0.029242 |
| PSMC5         | ENSG00000087191 | 4490 | 0.188799 | 0.003773 | 0.038204 |
| PPP1R8        | ENSG00000117751 | 2819 | 0.188911 | 0.000741 | 0.014437 |
| SNRNP40       | ENSG00000060688 | 3881 | 0.188955 | 0.001014 | 0.017293 |
| C14orf166     | ENSG00000087302 | 8323 | 0.189238 | 0.002141 | 0.027076 |
| SUPT4H1       | ENSG00000213246 | 2079 | 0.189289 | 0.000679 | 0.013759 |
| RNF139        | ENSG00000170881 | 2700 | 0.189323 | 0.001518 | 0.021908 |
| ERI3          | ENSG00000117419 | 2642 | 0.189599 | 0.000534 | 0.012074 |
| NGRN          | ENSG00000182768 | 7694 | 0.189606 | 0.001273 | 0.019703 |
| OSTF1         | ENSG00000134996 | 1319 | 0.189657 | 0.004059 | 0.03995  |
| ZMAT2         | ENSG00000146007 | 1812 | 0.189731 | 0.000963 | 0.016814 |
| HNRNPA1       | ENSG00000135486 | 5093 | 0.189738 | 0.000301 | 0.008715 |
| RP11-26J3.4   | ENSG00000276418 | 1593 | 0.189814 | 0.003563 | 0.037022 |
| RP11-315I20.1 | ENSG00000234222 | 3175 | 0.18992  | 0.004586 | 0.042883 |
| REEP5         | ENSG00000129625 | 4230 | 0.189992 | 0.00051  | 0.011785 |
| DERL2         | ENSG00000072849 | 6386 | 0.190431 | 0.002177 | 0.027344 |

|               |                 |      |          |          |          |
|---------------|-----------------|------|----------|----------|----------|
| SNUPN         | ENSG00000169371 | 3516 | 0.190442 | 0.002116 | 0.026871 |
| TSG101        | ENSG00000074319 | 3839 | 0.191114 | 0.00286  | 0.032288 |
| RIOK2         | ENSG00000058729 | 5502 | 0.191128 | 0.002137 | 0.027063 |
| HSDL1         | ENSG00000103160 | 4507 | 0.191243 | 0.005323 | 0.047204 |
| SAMM50        | ENSG00000100347 | 6435 | 0.191326 | 0.002223 | 0.027667 |
| ARMC1         | ENSG00000104442 | 3421 | 0.191506 | 0.000854 | 0.015591 |
| BRE           | ENSG00000158019 | 3392 | 0.191527 | 0.005757 | 0.049296 |
| BCCIP         | ENSG00000107949 | 4498 | 0.19166  | 0.002941 | 0.032764 |
| RPP30         | ENSG00000148688 | 4653 | 0.191878 | 0.002923 | 0.032614 |
| POP4          | ENSG00000105171 | 6574 | 0.191959 | 0.000522 | 0.011931 |
| SAE1          | ENSG00000142230 | 3396 | 0.192482 | 0.004165 | 0.040615 |
| PPIE          | ENSG00000084072 | 8071 | 0.192534 | 0.002364 | 0.028674 |
| TMEM165       | ENSG00000134851 | 7045 | 0.192718 | 0.001166 | 0.018836 |
| AC010642.1    | ENSG00000267216 | 4227 | 0.192925 | 0.000116 | 0.005253 |
| MAPRE1        | ENSG00000101367 | 2623 | 0.193156 | 0.001663 | 0.023161 |
| UBE2L3        | ENSG00000185651 | 3838 | 0.19353  | 0.00295  | 0.032817 |
| MGAT2         | ENSG00000168282 | 2687 | 0.193748 | 0.001744 | 0.023879 |
| PIGU          | ENSG00000101464 | 2609 | 0.193755 | 0.005329 | 0.047234 |
| RPL22         | ENSG00000116251 | 4900 | 0.193898 | 0.004707 | 0.043626 |
| RP11-21J18.1  | ENSG00000265257 | 1050 | 0.194283 | 0.004027 | 0.03979  |
| FAM114A2      | ENSG00000055147 | 6543 | 0.194552 | 0.000749 | 0.014487 |
| MRPS14        | ENSG00000120333 | 2594 | 0.194617 | 0.000566 | 0.012509 |
| RP11-649E7.5  | ENSG00000258377 | 2469 | 0.1947   | 0.001653 | 0.02309  |
| VWA9          | ENSG00000138614 | 4210 | 0.194824 | 7.21E-05 | 0.004182 |
| COQ5          | ENSG00000110871 | 2523 | 0.195057 | 0.004296 | 0.041377 |
| RP11-336A10.2 | ENSG00000226647 | 1412 | 0.195151 | 0.001178 | 0.018908 |
| PPP2R3C       | ENSG00000092020 | 3863 | 0.195343 | 0.002778 | 0.03169  |
| NGDN          | ENSG00000129460 | 4654 | 0.195532 | 0.00022  | 0.007424 |
| LHFPL5        | ENSG00000197753 | 2961 | 0.19588  | 0.000877 | 0.015873 |
| TFAM          | ENSG00000108064 | 5606 | 0.195915 | 0.000936 | 0.016547 |
| KDEL2         | ENSG00000136240 | 3990 | 0.196009 | 0.001756 | 0.023967 |
| IFT52         | ENSG00000101052 | 2542 | 0.196092 | 0.005569 | 0.04835  |
| LBHD1         | ENSG00000162194 | 3362 | 0.196281 | 0.001086 | 0.018105 |
| EXOSC1        | ENSG00000171311 | 3345 | 0.196356 | 0.0014   | 0.020855 |
| CANX          | ENSG00000127022 | 6235 | 0.196704 | 0.005818 | 0.049601 |
| ATP6V1A       | ENSG00000114573 | 5130 | 0.196763 | 0.000755 | 0.014559 |
| CTD-2545G14.6 | ENSG00000279641 | 1615 | 0.197359 | 0.001204 | 0.019123 |
| HNRNPC        | ENSG00000092199 | 7309 | 0.197588 | 0.001357 | 0.020422 |
| MRPL48        | ENSG00000175581 | 4386 | 0.197619 | 0.003185 | 0.034436 |
| ALG6          | ENSG00000088035 | 4950 | 0.197628 | 0.001487 | 0.021654 |
| TEFM          | ENSG00000172171 | 3224 | 0.197724 | 0.000271 | 0.008275 |

|               |                 |       |          |          |          |
|---------------|-----------------|-------|----------|----------|----------|
| FOCAD         | ENSG00000188352 | 10036 | 0.197732 | 0.001429 | 0.021175 |
| RNF5          | ENSG00000204308 | 1178  | 0.198041 | 0.004923 | 0.044854 |
| FTSJ2         | ENSG00000122687 | 2843  | 0.19822  | 0.000567 | 0.012511 |
| NDUFV2        | ENSG00000178127 | 2711  | 0.199284 | 0.003451 | 0.036257 |
| CCDC84        | ENSG00000186166 | 5105  | 0.199437 | 0.000156 | 0.006081 |
| ZCCHC17       | ENSG00000121766 | 1843  | 0.19949  | 0.00094  | 0.016574 |
| WDR41         | ENSG00000164253 | 7230  | 0.199967 | 0.000456 | 0.011003 |
| RPL5          | ENSG00000122406 | 2890  | 0.20032  | 0.004813 | 0.044162 |
| DDX50         | ENSG00000107625 | 2692  | 0.200348 | 0.000464 | 0.011105 |
| CUTA          | ENSG00000112514 | 1876  | 0.200471 | 0.001576 | 0.022395 |
| ATXN10        | ENSG00000130638 | 5098  | 0.200608 | 0.000344 | 0.009424 |
| CLN5          | ENSG00000102805 | 4226  | 0.200733 | 0.001357 | 0.020422 |
| ELP6          | ENSG00000163832 | 3313  | 0.200854 | 0.000603 | 0.012899 |
| MRPS17        | ENSG00000249773 | 1732  | 0.200933 | 0.004883 | 0.044594 |
| RNMTL1        | ENSG00000171861 | 2065  | 0.201375 | 0.00586  | 0.049868 |
| DLD           | ENSG00000091140 | 5299  | 0.201377 | 0.001137 | 0.018552 |
| NFU1          | ENSG00000169599 | 2197  | 0.201402 | 0.005145 | 0.046228 |
| MIF4GD        | ENSG00000125457 | 2283  | 0.201465 | 0.004412 | 0.042036 |
| WDR47         | ENSG00000085433 | 4423  | 0.20156  | 0.000388 | 0.010037 |
| TSN           | ENSG00000211460 | 4407  | 0.201816 | 0.000134 | 0.005606 |
| ARV1          | ENSG00000173409 | 1987  | 0.201849 | 0.004579 | 0.042832 |
| RP11-697E2.6  | ENSG00000261147 | 3838  | 0.202113 | 0.001264 | 0.019589 |
| SLC39A9       | ENSG00000029364 | 7136  | 0.202193 | 0.002458 | 0.029283 |
| WDR61         | ENSG00000140395 | 7279  | 0.202207 | 3.79E-05 | 0.00296  |
| BTBD3         | ENSG00000132640 | 6228  | 0.20227  | 0.005412 | 0.047676 |
| COMMD2        | ENSG00000114744 | 4901  | 0.202371 | 0.003753 | 0.038105 |
| RP11-546B15.1 | ENSG00000261002 | 988   | 0.202656 | 0.000543 | 0.012171 |
| ZNF627        | ENSG00000198551 | 3827  | 0.202765 | 0.000107 | 0.005039 |
| RP11-770J1.5  | ENSG00000254873 | 2395  | 0.203153 | 0.000668 | 0.013662 |
| SPCS1         | ENSG00000114902 | 5324  | 0.203443 | 0.002184 | 0.027382 |
| PFDN6         | ENSG00000204220 | 2953  | 0.203598 | 0.001427 | 0.021165 |
| COX4I1        | ENSG00000131143 | 4792  | 0.203778 | 0.004189 | 0.040762 |
| CTNNB1        | ENSG00000168036 | 6614  | 0.203875 | 0.004066 | 0.039999 |
| MAGT1         | ENSG00000102158 | 4862  | 0.204018 | 0.003927 | 0.039114 |
| TMEM251       | ENSG00000153485 | 1365  | 0.20446  | 0.003683 | 0.037655 |
| VKORC1L1      | ENSG00000196715 | 5899  | 0.204629 | 0.004272 | 0.041239 |
| POLR2C        | ENSG00000102978 | 3940  | 0.204648 | 0.000757 | 0.014574 |
| EEF1A1P19     | ENSG00000249855 | 1382  | 0.204677 | 0.001864 | 0.024805 |
| MIPEP         | ENSG00000027001 | 3407  | 0.204803 | 0.000694 | 0.0139   |
| RP5-1014D13.2 | ENSG00000279738 | 19416 | 0.204868 | 0.00322  | 0.034688 |
| GAS2          | ENSG00000148935 | 3529  | 0.204946 | 0.004113 | 0.040272 |

|               |                 |      |          |          |          |
|---------------|-----------------|------|----------|----------|----------|
| TTC1          | ENSG00000113312 | 1938 | 0.204961 | 0.000685 | 0.013817 |
| FDXACB1       | ENSG00000255561 | 3551 | 0.205017 | 0.005728 | 0.049169 |
| COPS6         | ENSG00000168090 | 2807 | 0.205201 | 0.000179 | 0.006587 |
| COPZ1         | ENSG00000111481 | 3901 | 0.205263 | 0.001053 | 0.017736 |
| NAGA          | ENSG00000198951 | 3706 | 0.205584 | 0.003648 | 0.037479 |
| APMAP         | ENSG00000101474 | 2454 | 0.205728 | 0.001607 | 0.022724 |
| RWDD1         | ENSG00000111832 | 5909 | 0.205784 | 0.004025 | 0.039789 |
| COPS3         | ENSG00000141030 | 2788 | 0.205847 | 0.001633 | 0.02289  |
| PSMB7         | ENSG00000136930 | 1787 | 0.206228 | 0.003519 | 0.036733 |
| VAMP8         | ENSG00000118640 | 990  | 0.206356 | 0.005359 | 0.047356 |
| AC144449.1    | ENSG00000231969 | 1022 | 0.206728 | 0.001769 | 0.024017 |
| UTP6          | ENSG00000108651 | 6450 | 0.206786 | 2.74E-05 | 0.002487 |
| AC091133.1    | ENSG00000230532 | 483  | 0.206886 | 0.001261 | 0.019567 |
| CYB5B         | ENSG00000103018 | 6903 | 0.207038 | 0.001845 | 0.024697 |
| METTL5        | ENSG00000138382 | 2865 | 0.207477 | 0.003585 | 0.03713  |
| ANKRA2        | ENSG00000164331 | 2659 | 0.207697 | 0.002414 | 0.028975 |
| SYNJ2BP-COX16 | ENSG00000258644 | 1404 | 0.20771  | 0.000675 | 0.013717 |
| TXNDC12       | ENSG00000117862 | 3630 | 0.207795 | 0.000309 | 0.008834 |
| LYRM2         | ENSG00000083099 | 8679 | 0.208032 | 0.00071  | 0.01408  |
| MTMR6         | ENSG00000139505 | 5779 | 0.208411 | 0.003446 | 0.036227 |
| AC009120.6    | ENSG00000259972 | 3297 | 0.208541 | 0.000494 | 0.0116   |
| JAGN1         | ENSG00000171135 | 1799 | 0.208551 | 0.004307 | 0.041419 |
| ARHGAP19      | ENSG00000213390 | 6167 | 0.208558 | 0.005382 | 0.04747  |
| KBTBD7        | ENSG00000120696 | 4734 | 0.208698 | 0.000336 | 0.009311 |
| L3MBTL2       | ENSG00000100395 | 6451 | 0.208799 | 0.000325 | 0.00912  |
| ATRAID        | ENSG00000138085 | 2019 | 0.209112 | 0.000979 | 0.016923 |
| HEXB          | ENSG00000049860 | 5067 | 0.209153 | 0.003812 | 0.038429 |
| TIMM21        | ENSG00000075336 | 5208 | 0.209567 | 0.003324 | 0.035339 |
| PPCS          | ENSG00000127125 | 2590 | 0.209586 | 0.001672 | 0.023241 |
| PRUNE         | ENSG00000143363 | 3063 | 0.210016 | 0.000227 | 0.007589 |
| UMPS          | ENSG00000114491 | 3499 | 0.210372 | 8E-05    | 0.004442 |
| CTD-2540L5.5  | ENSG00000259115 | 611  | 0.210633 | 0.000115 | 0.00522  |
| CAPZA1        | ENSG00000116489 | 4130 | 0.210684 | 0.004781 | 0.044011 |
| LINC00339     | ENSG00000218510 | 1424 | 0.210728 | 0.005037 | 0.045544 |
| HMG2          | ENSG00000198830 | 2509 | 0.210831 | 0.000544 | 0.012171 |
| LZIC          | ENSG00000162441 | 2794 | 0.210999 | 1.96E-05 | 0.002005 |
| AARSD1        | ENSG00000266967 | 3704 | 0.21112  | 0.004014 | 0.039715 |
| CTC-487M23.8  | ENSG00000272869 | 2174 | 0.211245 | 0.003162 | 0.034337 |
| ANXA7         | ENSG00000138279 | 2862 | 0.211385 | 0.00072  | 0.014202 |
| CCDC115       | ENSG00000136710 | 3782 | 0.211487 | 0.001199 | 0.019091 |
| LSM4          | ENSG00000130520 | 3029 | 0.21156  | 0.002615 | 0.030504 |

|               |                 |      |          |          |          |
|---------------|-----------------|------|----------|----------|----------|
| CSTF1         | ENSG00000101138 | 4800 | 0.211675 | 4.91E-05 | 0.003429 |
| SFT2D1        | ENSG00000198818 | 3104 | 0.211744 | 3.95E-05 | 0.003008 |
| NAA20         | ENSG00000173418 | 2376 | 0.211808 | 0.00013  | 0.005521 |
| TWISTNB       | ENSG00000105849 | 3997 | 0.211943 | 0.005745 | 0.04927  |
| EI24          | ENSG00000149547 | 3558 | 0.211956 | 0.000114 | 0.00519  |
| NELFE         | ENSG00000204356 | 2719 | 0.212001 | 0.00393  | 0.039131 |
| M6PR          | ENSG00000003056 | 3777 | 0.212245 | 0.000129 | 0.005521 |
| EIF3H         | ENSG00000147677 | 6434 | 0.212363 | 0.000351 | 0.009525 |
| C11orf73      | ENSG00000149196 | 3421 | 0.212434 | 0.000214 | 0.007294 |
| UGP2          | ENSG00000169764 | 6495 | 0.21257  | 0.001864 | 0.024805 |
| MED31         | ENSG00000108590 | 2103 | 0.212941 | 0.005705 | 0.049053 |
| COA7          | ENSG00000162377 | 4165 | 0.213044 | 0.004495 | 0.042497 |
| MNAT1         | ENSG00000020426 | 3865 | 0.213056 | 0.002273 | 0.02792  |
| TIMMDC1       | ENSG00000113845 | 2730 | 0.213329 | 6.26E-05 | 0.003815 |
| PPIH          | ENSG00000171960 | 1444 | 0.213532 | 0.002132 | 0.027036 |
| RAP1GDS1      | ENSG00000138698 | 5424 | 0.214047 | 0.000107 | 0.005039 |
| URM1          | ENSG00000167118 | 4410 | 0.214566 | 0.005508 | 0.047998 |
| XRCC5         | ENSG00000079246 | 5463 | 0.214625 | 0.000379 | 0.00993  |
| C4orf46       | ENSG00000205208 | 3730 | 0.214965 | 0.004413 | 0.042036 |
| G3BP2         | ENSG00000138757 | 7183 | 0.215103 | 0.003717 | 0.037875 |
| FASTKD1       | ENSG00000138399 | 4497 | 0.215112 | 0.000158 | 0.006106 |
| MRPS21        | ENSG00000266472 | 1641 | 0.215154 | 0.000613 | 0.013033 |
| CCT5          | ENSG00000150753 | 5839 | 0.215228 | 0.001759 | 0.023979 |
| ATP6AP2       | ENSG00000182220 | 2573 | 0.215573 | 0.000145 | 0.005806 |
| SAR1A         | ENSG00000079332 | 6914 | 0.215829 | 0.000957 | 0.016763 |
| TMEM59        | ENSG00000116209 | 4167 | 0.215835 | 0.001585 | 0.022482 |
| RNF25         | ENSG00000163481 | 2323 | 0.215841 | 0.001333 | 0.020271 |
| NUDCD1        | ENSG00000120526 | 4439 | 0.215886 | 0.00358  | 0.03713  |
| CGRRF1        | ENSG00000100532 | 4564 | 0.216049 | 0.001435 | 0.021212 |
| ADH5          | ENSG00000197894 | 4866 | 0.216433 | 0.00205  | 0.026467 |
| ESD           | ENSG00000139684 | 3401 | 0.216445 | 0.001329 | 0.02026  |
| STRAP         | ENSG00000023734 | 2211 | 0.216484 | 0.000937 | 0.016547 |
| MRPL57        | ENSG00000173141 | 2246 | 0.216528 | 0.000919 | 0.016372 |
| RP11-661A12.7 | ENSG00000254741 | 431  | 0.216541 | 0.001149 | 0.018671 |
| RP11-677I18.3 | ENSG00000254433 | 1247 | 0.216789 | 0.001052 | 0.017728 |
| ILF2          | ENSG00000143621 | 2281 | 0.216813 | 0.004694 | 0.043546 |
| TIMM23        | ENSG00000265354 | 1222 | 0.216929 | 0.002233 | 0.027677 |
| MRPL33        | ENSG00000243147 | 1539 | 0.217065 | 0.001915 | 0.025191 |
| MTX2          | ENSG00000128654 | 1717 | 0.217102 | 1.85E-05 | 0.001937 |
| DCLRE1A       | ENSG00000198924 | 4600 | 0.217203 | 0.000466 | 0.011131 |
| NUDT5         | ENSG00000165609 | 4969 | 0.217223 | 1.54E-05 | 0.00175  |

|                |                 |      |          |          |          |
|----------------|-----------------|------|----------|----------|----------|
| RP11-15L13.4   | ENSG00000272910 | 501  | 0.217223 | 0.001893 | 0.025074 |
| RPS6           | ENSG00000137154 | 2714 | 0.217246 | 0.002261 | 0.027841 |
| PSMA1          | ENSG00000129084 | 3301 | 0.21734  | 0.001767 | 0.024008 |
| PTGES3L-AARSD1 | ENSG00000108825 | 2383 | 0.217376 | 0.002706 | 0.031232 |
| GOT2           | ENSG00000125166 | 3766 | 0.217445 | 0.000578 | 0.012681 |
| SLC17A5        | ENSG00000119899 | 3604 | 0.217503 | 0.004452 | 0.042275 |
| ACTL6A         | ENSG00000136518 | 3675 | 0.21782  | 0.000426 | 0.010548 |
| DTD1           | ENSG00000125821 | 3329 | 0.217836 | 0.003069 | 0.033698 |
| SSBP1          | ENSG00000106028 | 4988 | 0.217859 | 0.000685 | 0.013817 |
| MED8           | ENSG00000159479 | 2704 | 0.217885 | 0.002992 | 0.033137 |
| RPS8           | ENSG00000142937 | 2847 | 0.21805  | 0.004543 | 0.042686 |
| MRPL35         | ENSG00000132313 | 3829 | 0.218113 | 0.00093  | 0.016503 |
| PPP1R42        | ENSG00000178125 | 2250 | 0.218302 | 0.001242 | 0.019464 |
| HCCS           | ENSG00000004961 | 2335 | 0.218398 | 0.00105  | 0.017697 |
| CREG1          | ENSG00000143162 | 2688 | 0.219005 | 0.001169 | 0.01884  |
| CCT4           | ENSG00000115484 | 2830 | 0.219309 | 0.0001   | 0.004953 |
| SNX11          | ENSG00000002919 | 3606 | 0.219859 | 0.001176 | 0.018886 |
| DDX3X          | ENSG00000215301 | 8881 | 0.219938 | 0.005267 | 0.046925 |
| RPL18          | ENSG00000063177 | 4209 | 0.220075 | 0.004492 | 0.042497 |
| GRPEL2         | ENSG00000164284 | 4419 | 0.220347 | 0.003072 | 0.033706 |
| COQ2           | ENSG00000173085 | 2774 | 0.220443 | 0.001492 | 0.021692 |
| SAP18          | ENSG00000150459 | 3396 | 0.220744 | 0.000706 | 0.014023 |
| RP11-644F5.10  | ENSG00000258311 | 3510 | 0.22075  | 0.003924 | 0.039112 |
| LMAN2L         | ENSG00000114988 | 2709 | 0.220755 | 0.001898 | 0.025099 |
| CDC123         | ENSG00000151465 | 2404 | 0.220869 | 0.000212 | 0.007266 |
| OMA1           | ENSG00000162600 | 3718 | 0.220977 | 0.005351 | 0.047351 |
| GMFB           | ENSG00000197045 | 7966 | 0.221045 | 0.003141 | 0.034177 |
| SRP9P1         | ENSG00000180581 | 261  | 0.221246 | 0.002822 | 0.03202  |
| PSMC6          | ENSG00000100519 | 7482 | 0.221306 | 0.000382 | 0.009964 |
| ABT1           | ENSG00000146109 | 2949 | 0.221517 | 0.000424 | 0.01053  |
| XRCC6          | ENSG00000196419 | 3288 | 0.221822 | 0.000342 | 0.009378 |
| SUMO2P17       | ENSG00000248278 | 897  | 0.222029 | 0.001854 | 0.024756 |
| CTSL           | ENSG00000135047 | 2366 | 0.222162 | 0.002888 | 0.032374 |
| ISCA2          | ENSG00000165898 | 3061 | 0.222193 | 0.000107 | 0.005039 |
| RP11-69L16.4   | ENSG00000238221 | 500  | 0.222204 | 0.001261 | 0.019567 |
| LSM2           | ENSG00000204392 | 1077 | 0.222301 | 0.005748 | 0.04927  |
| PRPS1          | ENSG00000147224 | 2280 | 0.222568 | 0.004405 | 0.042036 |
| ATP5F1         | ENSG00000116459 | 3383 | 0.222581 | 0.004098 | 0.0402   |
| PSMD7          | ENSG00000103035 | 2740 | 0.222663 | 0.001593 | 0.02256  |
| EIF1AXP1       | ENSG00000236698 | 435  | 0.222705 | 0.003318 | 0.035311 |



|               |                 |      |          |          |          |
|---------------|-----------------|------|----------|----------|----------|
| CISD1         | ENSG00000122873 | 2857 | 0.2229   | 0.005313 | 0.047152 |
| PTPMT1        | ENSG00000110536 | 2740 | 0.222904 | 0.000484 | 0.011407 |
| HNRNP2        | ENSG00000126945 | 2223 | 0.222937 | 0.000835 | 0.015364 |
| ANAPC16       | ENSG00000166295 | 4324 | 0.223002 | 0.000424 | 0.010531 |
| TMEM98        | ENSG00000006042 | 5187 | 0.223045 | 0.000457 | 0.011009 |
| NABP2         | ENSG00000139579 | 2218 | 0.223166 | 0.003188 | 0.034456 |
| LRRC75A-AS1   | ENSG00000175061 | 3759 | 0.223185 | 0.002554 | 0.030001 |
| EIF2B3        | ENSG00000070785 | 3411 | 0.22331  | 0.001586 | 0.022488 |
| FASTKD2       | ENSG00000118246 | 6079 | 0.22354  | 0.000273 | 0.008331 |
| BET1          | ENSG00000105829 | 5247 | 0.223581 | 0.005074 | 0.045816 |
| AAGAB         | ENSG00000103591 | 3833 | 0.223689 | 0.00105  | 0.017697 |
| TMEM205       | ENSG00000105518 | 1606 | 0.223806 | 0.004609 | 0.042991 |
| DHRS7B        | ENSG00000109016 | 5544 | 0.223822 | 0.003295 | 0.035126 |
| MRPS23        | ENSG00000181610 | 6379 | 0.223887 | 0.001102 | 0.018281 |
| CMTM7         | ENSG00000153551 | 3751 | 0.224621 | 0.001106 | 0.01831  |
| TEX30         | ENSG00000151287 | 2154 | 0.22505  | 0.003525 | 0.036762 |
| RASL11A       | ENSG00000122035 | 1624 | 0.225075 | 0.00572  | 0.049118 |
| SRSF3         | ENSG00000112081 | 7118 | 0.22526  | 0.000343 | 0.009401 |
| RP11-486O12.2 | ENSG00000247373 | 8279 | 0.225458 | 0.00207  | 0.026558 |
| RP11-831H9.11 | ENSG00000255432 | 577  | 0.22576  | 0.001131 | 0.018509 |
| PSMD13        | ENSG00000185627 | 4767 | 0.225906 | 0.00039  | 0.010071 |
| LAMTOR1       | ENSG00000149357 | 2778 | 0.226369 | 0.001531 | 0.022017 |
| POLR3B        | ENSG00000013503 | 4858 | 0.22638  | 0.001058 | 0.017798 |
| MDP1          | ENSG00000213920 | 1072 | 0.226425 | 0.000315 | 0.008954 |
| SMDT1         | ENSG00000183172 | 1731 | 0.22644  | 0.001917 | 0.025202 |
| MRPS16        | ENSG00000182180 | 2794 | 0.226633 | 0.000464 | 0.011105 |
| PPP1R7        | ENSG00000115685 | 3781 | 0.226695 | 0.000157 | 0.006092 |
| PRELID2       | ENSG00000186314 | 5375 | 0.227035 | 0.002294 | 0.028086 |
| FBXL5         | ENSG00000118564 | 4573 | 0.227325 | 0.000895 | 0.016068 |
| C1GALT1C1     | ENSG00000171155 | 1785 | 0.227363 | 0.000702 | 0.013974 |
| MSANTD4       | ENSG00000170903 | 5105 | 0.227441 | 0.000475 | 0.011267 |
| RP4-734P14.4  | ENSG00000256566 | 823  | 0.227619 | 0.001312 | 0.020085 |
| SSR2          | ENSG00000163479 | 6651 | 0.22773  | 0.001082 | 0.018096 |
| CFDP1         | ENSG00000153774 | 3317 | 0.227857 | 0.001462 | 0.021442 |
| CAP1          | ENSG00000131236 | 3814 | 0.227885 | 0.003486 | 0.036524 |
| ASAH1         | ENSG00000104763 | 5051 | 0.22798  | 0.000381 | 0.009956 |
| PSAP          | ENSG00000197746 | 3224 | 0.2283   | 0.002075 | 0.026592 |
| TSSC1         | ENSG00000032389 | 5775 | 0.228401 | 0.004433 | 0.042152 |
| SCMH1         | ENSG00000010803 | 4447 | 0.228415 | 0.003183 | 0.034436 |
| TCEB1         | ENSG00000154582 | 4934 | 0.228476 | 0.005204 | 0.046594 |
| ISOC1         | ENSG00000066583 | 1940 | 0.228487 | 0.000298 | 0.008696 |

|               |                 |       |          |          |          |
|---------------|-----------------|-------|----------|----------|----------|
| RANGRF        | ENSG00000108961 | 1577  | 0.228572 | 0.002228 | 0.027667 |
| PTRHD1        | ENSG00000184924 | 1917  | 0.228686 | 0.002137 | 0.027063 |
| FARSA         | ENSG00000179115 | 2435  | 0.229191 | 0.001547 | 0.022148 |
| SEC61A1       | ENSG00000058262 | 4697  | 0.229304 | 0.001246 | 0.019494 |
| ATP5A1        | ENSG00000152234 | 10908 | 0.22946  | 0.003726 | 0.037892 |
| CTSC          | ENSG00000109861 | 11421 | 0.229493 | 0.004364 | 0.04173  |
| YWHAE         | ENSG00000108953 | 3847  | 0.229656 | 0.000141 | 0.005755 |
| TOMM6         | ENSG00000214736 | 637   | 0.229816 | 0.000292 | 0.008642 |
| C17orf49      | ENSG00000258315 | 2628  | 0.22982  | 0.002181 | 0.02738  |
| WDR83         | ENSG00000123154 | 2360  | 0.229902 | 0.000971 | 0.016885 |
| MIR1282       | ENSG00000221792 | 101   | 0.230417 | 0.002857 | 0.032273 |
| SRP9          | ENSG00000143742 | 1728  | 0.230427 | 0.000796 | 0.015076 |
| UQCRFS1       | ENSG00000169021 | 3475  | 0.230628 | 0.002246 | 0.027751 |
| CFAP20        | ENSG00000070761 | 2375  | 0.230992 | 0.002331 | 0.028384 |
| SNAPC5        | ENSG00000174446 | 2509  | 0.231155 | 3.6E-05  | 0.002905 |
| RNASEK        | ENSG00000219200 | 1789  | 0.231286 | 0.002229 | 0.027667 |
| THNSL1        | ENSG00000185875 | 3788  | 0.231845 | 0.002874 | 0.032351 |
| POLR2I        | ENSG00000105258 | 1269  | 0.232025 | 0.005374 | 0.047464 |
| DHRS12        | ENSG00000102796 | 3525  | 0.232214 | 0.004709 | 0.043633 |
| ZBTB6         | ENSG00000186130 | 4106  | 0.232306 | 0.000275 | 0.008346 |
| ERGIC3        | ENSG00000125991 | 6012  | 0.232345 | 0.000254 | 0.008018 |
| CDK5          | ENSG00000164885 | 2939  | 0.232566 | 0.003588 | 0.03713  |
| LRR1          | ENSG00000165501 | 2359  | 0.23309  | 0.001098 | 0.018239 |
| ORMDL2        | ENSG00000123353 | 2810  | 0.233204 | 0.003903 | 0.038988 |
| CHCHD3        | ENSG00000106554 | 3718  | 0.233207 | 0.001646 | 0.023017 |
| WDR25         | ENSG00000176473 | 4218  | 0.233264 | 0.000402 | 0.01025  |
| LAPTM4A       | ENSG00000068697 | 1946  | 0.233323 | 2.33E-05 | 0.002188 |
| AD001527.4    | ENSG00000279504 | 785   | 0.233373 | 0.00485  | 0.044398 |
| RP11-258F1.2  | ENSG00000279428 | 3130  | 0.233455 | 0.004244 | 0.041087 |
| OXSM          | ENSG00000151093 | 2486  | 0.233463 | 0.00023  | 0.007647 |
| ADSL          | ENSG00000239900 | 5632  | 0.233472 | 0.000643 | 0.013429 |
| CSE1L         | ENSG00000124207 | 3800  | 0.233623 | 0.001873 | 0.024881 |
| RPL11         | ENSG00000142676 | 1987  | 0.233641 | 0.002427 | 0.029091 |
| POLE4         | ENSG00000115350 | 2151  | 0.233916 | 0.001687 | 0.023357 |
| C11orf31      | ENSG00000211450 | 2305  | 0.234066 | 0.003517 | 0.036726 |
| UXT-AS1       | ENSG00000267064 | 1545  | 0.234174 | 0.00414  | 0.040469 |
| SEC11A        | ENSG00000140612 | 5748  | 0.234706 | 0.000105 | 0.00502  |
| GFM1          | ENSG00000168827 | 9032  | 0.23475  | 0.000119 | 0.005312 |
| RP11-661A12.8 | ENSG00000279605 | 4947  | 0.23505  | 0.001006 | 0.017216 |
| CLP1          | ENSG00000172409 | 2793  | 0.235199 | 0.000406 | 0.010306 |
| TRAPPC13      | ENSG00000113597 | 7049  | 0.235377 | 5.32E-05 | 0.00359  |

|                 |                 |      |          |          |          |
|-----------------|-----------------|------|----------|----------|----------|
| EIF1AX          | ENSG00000173674 | 4427 | 0.235439 | 0.001171 | 0.018861 |
| COPS8           | ENSG00000198612 | 4743 | 0.235682 | 0.002732 | 0.031391 |
| MPC2            | ENSG00000143158 | 2552 | 0.235772 | 0.000667 | 0.013662 |
| COMMD3          | ENSG00000148444 | 3317 | 0.236038 | 0.000206 | 0.007163 |
| TMED2           | ENSG00000086598 | 3830 | 0.236069 | 0.001685 | 0.023357 |
| COPB2           | ENSG00000184432 | 8177 | 0.236148 | 0.000678 | 0.013755 |
| SEP15           | ENSG00000183291 | 2103 | 0.236184 | 9.08E-05 | 0.004731 |
| MIR3655         | ENSG00000264052 | 83   | 0.236231 | 0.000328 | 0.009194 |
| C11orf98        | ENSG00000278615 | 887  | 0.236527 | 0.001482 | 0.021615 |
| PFDN5           | ENSG00000123349 | 3380 | 0.236686 | 0.000544 | 0.012171 |
| SDF2            | ENSG00000132581 | 3332 | 0.236725 | 0.000377 | 0.009926 |
| FAM209A         | ENSG00000124103 | 1137 | 0.236749 | 0.000445 | 0.010835 |
| AP2S1           | ENSG00000042753 | 1704 | 0.236778 | 0.005307 | 0.047152 |
| MYL12A          | ENSG00000101608 | 3245 | 0.236797 | 0.003061 | 0.033666 |
| RP11-411B6.6    | ENSG00000255339 | 2139 | 0.237034 | 0.003501 | 0.03665  |
| HIST1H2AC       | ENSG00000180573 | 1668 | 0.237353 | 0.002872 | 0.032351 |
| JKAMP           | ENSG00000050130 | 4350 | 0.237613 | 2.07E-05 | 0.002082 |
| PSMB2           | ENSG00000126067 | 4843 | 0.237679 | 0.000206 | 0.007163 |
| FAM220A         | ENSG00000178397 | 2395 | 0.237744 | 0.002789 | 0.031764 |
| NSF             | ENSG00000073969 | 5005 | 0.237818 | 1.04E-05 | 0.001378 |
| RPL3            | ENSG00000100316 | 4787 | 0.238001 | 0.001841 | 0.024662 |
| PCMT1           | ENSG00000120265 | 2832 | 0.23802  | 0.000185 | 0.006709 |
| RP11-802O23.3   | ENSG00000272182 | 561  | 0.238039 | 0.000209 | 0.007222 |
| ZNF576          | ENSG00000124444 | 3481 | 0.238236 | 0.000119 | 0.005321 |
| DDOST           | ENSG00000244038 | 2721 | 0.238275 | 0.001113 | 0.018381 |
| RP11-10L12.4    | ENSG00000246560 | 883  | 0.238318 | 0.003772 | 0.038204 |
| DCTN3           | ENSG00000137100 | 3740 | 0.238344 | 0.000796 | 0.015076 |
| TSPAN15         | ENSG00000099282 | 2646 | 0.238402 | 0.002781 | 0.031702 |
| DRG1            | ENSG00000185721 | 2113 | 0.238527 | 5.45E-05 | 0.003663 |
| AAR2            | ENSG00000131043 | 3101 | 0.238608 | 0.000347 | 0.00947  |
| SNRPB2          | ENSG00000125870 | 2607 | 0.239578 | 0.000971 | 0.016885 |
| AC073610.5      | ENSG00000255863 | 406  | 0.239593 | 0.000727 | 0.014282 |
| RPL14           | ENSG00000188846 | 2409 | 0.239707 | 0.002457 | 0.029283 |
| RNASEK-C17orf49 | ENSG00000161939 | 1947 | 0.239723 | 0.000653 | 0.01355  |
| SRP14           | ENSG00000140319 | 2005 | 0.239927 | 0.000177 | 0.006546 |
| ST13P19         | ENSG00000228110 | 1124 | 0.239931 | 0.005424 | 0.047709 |
| HSPA9           | ENSG00000113013 | 4751 | 0.239958 | 0.002086 | 0.026693 |
| ACTR10          | ENSG00000131966 | 4039 | 0.239969 | 0.000804 | 0.015148 |
| TMEM199         | ENSG00000244045 | 4620 | 0.239989 | 0.000255 | 0.008025 |
| SLC5A6          | ENSG00000138074 | 5606 | 0.240126 | 0.004338 | 0.041573 |
| YY1AP1          | ENSG00000163374 | 5001 | 0.240284 | 0.001481 | 0.021614 |

|               |                 |       |          |          |          |
|---------------|-----------------|-------|----------|----------|----------|
| TPI1          | ENSG00000111669 | 2700  | 0.240579 | 0.002377 | 0.028733 |
| ATG4A         | ENSG00000101844 | 2927  | 0.240598 | 0.005487 | 0.047931 |
| CTD-2256P15.4 | ENSG00000271980 | 2550  | 0.240744 | 0.000744 | 0.01445  |
| MFSD5         | ENSG00000182544 | 2581  | 0.240985 | 0.002381 | 0.028733 |
| PPIA          | ENSG00000196262 | 4432  | 0.241    | 0.000292 | 0.008642 |
| ATP5C1        | ENSG00000165629 | 2326  | 0.241421 | 0.00087  | 0.01583  |
| UXT           | ENSG00000126756 | 1243  | 0.241607 | 0.000345 | 0.009432 |
| NACA          | ENSG00000196531 | 10008 | 0.241805 | 0.001357 | 0.020422 |
| EIF3E         | ENSG00000104408 | 6005  | 0.241855 | 0.00559  | 0.048439 |
| ATP5J2-PTCD1  | ENSG00000248919 | 2859  | 0.24201  | 0.002489 | 0.029577 |
| EMC3          | ENSG00000125037 | 4270  | 0.242012 | 0.000171 | 0.006394 |
| NARS          | ENSG00000134440 | 4089  | 0.242307 | 0.001606 | 0.022724 |
| NSL1          | ENSG00000117697 | 4006  | 0.242529 | 0.002074 | 0.026592 |
| VDAC3         | ENSG00000078668 | 3141  | 0.242552 | 0.000243 | 0.007859 |
| ZMAT5         | ENSG00000100319 | 3200  | 0.242578 | 0.005205 | 0.046594 |
| RP11-446E9.1  | ENSG00000236814 | 1170  | 0.242578 | 0.00326  | 0.03489  |
| LINC00493     | ENSG00000232388 | 1098  | 0.242695 | 0.002977 | 0.03299  |
| RPS9          | ENSG00000170889 | 4371  | 0.242759 | 0.005382 | 0.04747  |
| SLC25A3       | ENSG00000075415 | 8896  | 0.242856 | 0.00126  | 0.019567 |
| PDHB          | ENSG00000168291 | 4717  | 0.242869 | 0.000177 | 0.006546 |
| PDZD11        | ENSG00000120509 | 1393  | 0.243117 | 0.000803 | 0.015146 |
| MARS2         | ENSG00000247626 | 3019  | 0.243136 | 0.002381 | 0.028733 |
| USO1          | ENSG00000138768 | 4588  | 0.243281 | 0.005509 | 0.047998 |
| CHID1         | ENSG00000177830 | 5984  | 0.243355 | 0.002042 | 0.026397 |
| CHMP2A        | ENSG00000130724 | 2129  | 0.243473 | 0.004311 | 0.041448 |
| ATP5I         | ENSG00000169020 | 940   | 0.243664 | 0.003487 | 0.036524 |
| NDUFB11       | ENSG00000147123 | 1418  | 0.2438   | 0.002538 | 0.029879 |
| TMA7          | ENSG00000232112 | 1139  | 0.243991 | 0.002688 | 0.031105 |
| CCT6A         | ENSG00000146731 | 3901  | 0.244005 | 0.000136 | 0.005622 |
| NDUFS3        | ENSG00000213619 | 3670  | 0.244056 | 0.002066 | 0.026558 |
| ARMCX6        | ENSG00000198960 | 2489  | 0.244205 | 0.000883 | 0.01593  |
| CTD-2545G14.7 | ENSG00000262526 | 776   | 0.244393 | 1.73E-05 | 0.001869 |
| RPS15         | ENSG00000115268 | 2137  | 0.24452  | 0.002949 | 0.032817 |
| GLT8D1        | ENSG00000016864 | 3916  | 0.244798 | 0.001936 | 0.025387 |
| PGK1          | ENSG00000102144 | 5415  | 0.245175 | 0.000253 | 0.008014 |
| AC002398.9    | ENSG00000188223 | 1037  | 0.245245 | 0.003066 | 0.033692 |
| GMNN          | ENSG00000112312 | 2476  | 0.24528  | 0.000366 | 0.009751 |
| NIPA2         | ENSG00000140157 | 3505  | 0.245425 | 0.000627 | 0.013207 |
| RRM1          | ENSG00000167325 | 4177  | 0.245453 | 0.000602 | 0.012895 |
| PSMA3         | ENSG00000100567 | 3119  | 0.245682 | 0.000483 | 0.011392 |
| GEMIN2        | ENSG00000092208 | 2532  | 0.24572  | 0.00069  | 0.013872 |

|                |                 |       |          |          |          |
|----------------|-----------------|-------|----------|----------|----------|
| MRPL18         | ENSG00000112110 | 1375  | 0.245949 | 0.001363 | 0.020454 |
| ATP5B          | ENSG00000110955 | 2322  | 0.245981 | 0.001606 | 0.022724 |
| LINC01420      | ENSG00000204272 | 1529  | 0.246548 | 0.001305 | 0.020029 |
| MRPL22         | ENSG00000082515 | 5267  | 0.246549 | 9.2E-05  | 0.004764 |
| RPL15          | ENSG00000174748 | 6528  | 0.246569 | 0.000301 | 0.008715 |
| KBTBD4         | ENSG00000123444 | 3302  | 0.246641 | 0.000188 | 0.006754 |
| RP11-193F5.1   | ENSG00000258892 | 200   | 0.247023 | 0.000818 | 0.015231 |
| TMEM9B         | ENSG00000175348 | 3064  | 0.247095 | 0.000173 | 0.006458 |
| RPL23          | ENSG00000125691 | 5979  | 0.247166 | 0.002734 | 0.031391 |
| RP11-977G19.10 | ENSG00000144785 | 1053  | 0.247517 | 3.2E-05  | 0.002759 |
| ATP6V1F        | ENSG00000128524 | 789   | 0.24753  | 0.00045  | 0.010918 |
| YIPF6          | ENSG00000181704 | 8850  | 0.247713 | 0.000409 | 0.010337 |
| ATG4C          | ENSG00000125703 | 3110  | 0.247972 | 0.001659 | 0.023132 |
| GNB2L1         | ENSG00000204628 | 5990  | 0.247982 | 0.000816 | 0.015231 |
| ARL6IP5        | ENSG00000144746 | 2522  | 0.24826  | 0.001115 | 0.018407 |
| HSPD1          | ENSG00000144381 | 4245  | 0.248303 | 0.00069  | 0.013872 |
| GTF3C6         | ENSG00000155115 | 1067  | 0.24839  | 0.002729 | 0.031391 |
| RP11-863K10.7  | ENSG00000183154 | 2086  | 0.248623 | 0.001094 | 0.018197 |
| BPGM           | ENSG00000172331 | 2539  | 0.24898  | 0.000473 | 0.011246 |
| PHF5A          | ENSG00000100410 | 1235  | 0.249234 | 0.000547 | 0.012199 |
| NEIL2          | ENSG00000154328 | 3367  | 0.249252 | 0.005485 | 0.047931 |
| RP3-337H4.9    | ENSG00000271754 | 545   | 0.249378 | 0.00236  | 0.028645 |
| GFM2           | ENSG00000164347 | 4197  | 0.249545 | 1.12E-06 | 0.000392 |
| RP1-101K10.6   | ENSG00000227627 | 663   | 0.249547 | 0.000744 | 0.01445  |
| RPL29          | ENSG00000162244 | 1912  | 0.249632 | 0.00545  | 0.047775 |
| NDUFB5         | ENSG00000136521 | 5871  | 0.249672 | 0.001249 | 0.019531 |
| ARPC5          | ENSG00000162704 | 10624 | 0.249732 | 0.00067  | 0.013679 |
| DYNLL1         | ENSG00000088986 | 2957  | 0.249764 | 0.00244  | 0.029183 |
| CKLF-CMTM1     | ENSG00000254788 | 1437  | 0.249826 | 0.002377 | 0.028733 |
| TRMT12         | ENSG00000183665 | 2331  | 0.249909 | 0.00013  | 0.005521 |
| LINC00998      | ENSG00000214194 | 1896  | 0.249923 | 0.002029 | 0.026273 |
| CKLF           | ENSG00000217555 | 1161  | 0.25006  | 0.001973 | 0.025667 |
| HAT1           | ENSG00000128708 | 6790  | 0.250205 | 0.000915 | 0.016338 |
| NDUFB8         | ENSG00000166136 | 1999  | 0.25026  | 0.001817 | 0.024449 |
| RP11-886H22.1  | ENSG00000266997 | 936   | 0.250391 | 0.002447 | 0.029226 |
| CYB561D2       | ENSG00000114395 | 2086  | 0.250556 | 0.004319 | 0.041479 |
| GRPEL1         | ENSG00000109519 | 4177  | 0.250697 | 0.00081  | 0.015195 |
| RP11-76I23.7   | ENSG00000231880 | 553   | 0.250911 | 0.000427 | 0.010567 |
| MXD3           | ENSG00000213347 | 5154  | 0.251023 | 0.004666 | 0.043381 |
| BANF1          | ENSG00000175334 | 1645  | 0.251195 | 0.000417 | 0.010418 |
| RPN2           | ENSG00000118705 | 2819  | 0.251306 | 0.00102  | 0.017327 |

|              |                 |      |          |          |          |
|--------------|-----------------|------|----------|----------|----------|
| PPIAP22      | ENSG00000198618 | 498  | 0.251363 | 0.000886 | 0.015949 |
| EEF1B2P3     | ENSG00000232472 | 678  | 0.251408 | 0.002158 | 0.027203 |
| NDUFB4       | ENSG00000065518 | 1889 | 0.251758 | 0.001832 | 0.024574 |
| TRAPPC3      | ENSG00000054116 | 3527 | 0.251882 | 9.06E-06 | 0.001298 |
| U47924.29    | ENSG00000271969 | 434  | 0.252052 | 0.001432 | 0.021196 |
| XPOT         | ENSG00000184575 | 7364 | 0.252193 | 0.003475 | 0.036468 |
| SPCS2        | ENSG00000118363 | 2982 | 0.252351 | 2.23E-05 | 0.002133 |
| RARS         | ENSG00000113643 | 3421 | 0.252413 | 0.000735 | 0.014355 |
| PRDX3        | ENSG00000165672 | 3417 | 0.252434 | 0.000257 | 0.008059 |
| ARL1         | ENSG00000120805 | 4979 | 0.252559 | 0.003243 | 0.034763 |
| VPS25        | ENSG00000131475 | 2404 | 0.252765 | 7.82E-05 | 0.00438  |
| ST13         | ENSG00000100380 | 4147 | 0.252971 | 0.000393 | 0.010124 |
| RNF113A      | ENSG00000125352 | 1353 | 0.25314  | 0.001913 | 0.025178 |
| AK6          | ENSG00000273841 | 2577 | 0.253678 | 0.0007   | 0.013956 |
| NEDD8-MDP1   | ENSG00000255526 | 1051 | 0.253697 | 8.24E-05 | 0.004483 |
| EMC7         | ENSG00000134153 | 1538 | 0.253923 | 0.000956 | 0.016763 |
| MRPL39       | ENSG00000154719 | 1199 | 0.254063 | 0.000553 | 0.012276 |
| HSPE1-MOB4   | ENSG00000270757 | 890  | 0.254232 | 0.001021 | 0.01734  |
| TCP1         | ENSG00000120438 | 4929 | 0.254243 | 0.000209 | 0.007222 |
| GTF2H5       | ENSG00000272047 | 7481 | 0.25442  | 0.003674 | 0.037619 |
| MRPL27       | ENSG00000108826 | 3027 | 0.254495 | 0.000191 | 0.006802 |
| RPL7A        | ENSG00000148303 | 2242 | 0.254575 | 0.000489 | 0.011512 |
| RP5-827C21.4 | ENSG00000231663 | 575  | 0.254788 | 0.004641 | 0.043218 |
| AKR1A1       | ENSG00000117448 | 3121 | 0.255086 | 0.002967 | 0.032931 |
| EMC4         | ENSG00000128463 | 4459 | 0.255183 | 9.34E-05 | 0.004774 |
| SELT         | ENSG00000198843 | 4135 | 0.255213 | 0.000205 | 0.007163 |
| RPL27        | ENSG00000131469 | 2026 | 0.255869 | 0.001381 | 0.020627 |
| RANBP1       | ENSG00000099901 | 4622 | 0.256047 | 0.004573 | 0.042815 |
| RPL6P27      | ENSG00000235552 | 872  | 0.256109 | 0.001442 | 0.021273 |
| JPX_1        | ENSG00000274430 | 135  | 0.256121 | 0.001301 | 0.019986 |
| ATP5G2       | ENSG00000135390 | 3991 | 0.25618  | 0.001427 | 0.021162 |
| TMEM14C      | ENSG00000111843 | 1321 | 0.256299 | 0.000145 | 0.005806 |
| RPA2         | ENSG00000117748 | 2019 | 0.25633  | 0.00014  | 0.005743 |
| MRPL20       | ENSG00000242485 | 2788 | 0.256391 | 0.000213 | 0.007271 |
| RP11-138I1.4 | ENSG00000265401 | 461  | 0.256396 | 0.00051  | 0.011785 |
| SWI5         | ENSG00000175854 | 1649 | 0.256638 | 0.004071 | 0.040034 |
| ATG101       | ENSG00000123395 | 3199 | 0.256909 | 0.005763 | 0.049315 |
| EIF3I        | ENSG00000084623 | 1725 | 0.256992 | 0.000727 | 0.014282 |
| BNIP1        | ENSG00000113734 | 2440 | 0.257065 | 0.000837 | 0.015391 |
| IDH1         | ENSG00000138413 | 4721 | 0.25708  | 0.001454 | 0.021349 |
| EIF3L        | ENSG00000100129 | 4296 | 0.25715  | 0.000407 | 0.010313 |

|                |                 |      |          |          |          |
|----------------|-----------------|------|----------|----------|----------|
| GHITM          | ENSG00000165678 | 2449 | 0.257193 | 0.002589 | 0.030267 |
| RP11-421L21.2  | ENSG00000235795 | 671  | 0.257262 | 0.001609 | 0.022733 |
| AC004549.6     | ENSG00000229893 | 859  | 0.257405 | 0.000757 | 0.014574 |
| EDF1           | ENSG00000107223 | 1200 | 0.257531 | 0.001116 | 0.018408 |
| FH             | ENSG00000091483 | 2142 | 0.257711 | 0.00035  | 0.009516 |
| C6orf48        | ENSG00000204387 | 1801 | 0.257949 | 0.001831 | 0.024574 |
| PDRG1          | ENSG00000088356 | 1998 | 0.258464 | 0.00118  | 0.018924 |
| POLR2F         | ENSG00000100142 | 7042 | 0.258549 | 9.49E-05 | 0.004815 |
| NDUFA7         | ENSG00000267855 | 1413 | 0.25864  | 0.005005 | 0.045355 |
| MRPL3          | ENSG00000114686 | 2715 | 0.258642 | 0.000385 | 0.010015 |
| STT3A          | ENSG00000134910 | 7345 | 0.2587   | 0.000299 | 0.008696 |
| MRPL47         | ENSG00000136522 | 1370 | 0.258767 | 0.002532 | 0.029855 |
| GABARAP        | ENSG00000170296 | 2266 | 0.258788 | 1.19E-05 | 0.001491 |
| TOMM22         | ENSG00000100216 | 2191 | 0.258962 | 0.000425 | 0.01054  |
| RP11-371E8.4   | ENSG00000259066 | 920  | 0.258972 | 3.9E-06  | 0.000804 |
| COX16          | ENSG00000133983 | 1863 | 0.259115 | 0.000549 | 0.012232 |
| C17orf58       | ENSG00000186665 | 1752 | 0.259421 | 0.004559 | 0.042762 |
| TRAPPC2L       | ENSG00000167515 | 4463 | 0.2596   | 0.000973 | 0.016885 |
| NHP2           | ENSG00000145912 | 1510 | 0.259691 | 0.001372 | 0.020548 |
| NDUFS4         | ENSG00000164258 | 1176 | 0.259741 | 0.000412 | 0.010356 |
| DOLK           | ENSG00000175283 | 2090 | 0.259858 | 0.000255 | 0.008022 |
| CCT8           | ENSG00000156261 | 3341 | 0.259889 | 5.67E-05 | 0.0037   |
| PSMC4          | ENSG00000013275 | 2387 | 0.259898 | 0.005322 | 0.047204 |
| POLR2L         | ENSG00000177700 | 1142 | 0.259913 | 0.005543 | 0.048191 |
| C2orf47        | ENSG00000162972 | 1624 | 0.260513 | 0.000584 | 0.012728 |
| RP11-603J24.14 | ENSG00000257809 | 540  | 0.260617 | 0.002237 | 0.027677 |
| YRDC           | ENSG00000196449 | 1826 | 0.260632 | 0.002285 | 0.027993 |
| PRMT1          | ENSG00000126457 | 4796 | 0.26068  | 0.000982 | 0.016953 |
| SARS           | ENSG00000031698 | 3836 | 0.260762 | 0.002471 | 0.029405 |
| DPH3           | ENSG00000154813 | 3562 | 0.260968 | 0.001807 | 0.024341 |
| MRPL50         | ENSG00000136897 | 3332 | 0.261532 | 0.000805 | 0.015153 |
| SPCS3          | ENSG00000129128 | 6831 | 0.261875 | 0.000396 | 0.010156 |
| RP11-97O12.5   | ENSG00000279945 | 517  | 0.261918 | 0.003113 | 0.034012 |
| RPL35          | ENSG00000136942 | 1535 | 0.26192  | 0.001549 | 0.022148 |
| TP53TG1        | ENSG00000182165 | 1023 | 0.262218 | 0.002692 | 0.031139 |
| MRPL36         | ENSG00000171421 | 1394 | 0.262317 | 0.002733 | 0.031391 |
| CCT7           | ENSG00000135624 | 3585 | 0.262324 | 4.83E-05 | 0.003409 |
| FAM103A2P      | ENSG00000235272 | 354  | 0.26236  | 0.004802 | 0.04412  |
| GPN3           | ENSG00000111231 | 2595 | 0.262456 | 0.001103 | 0.018281 |
| TRIAP1         | ENSG00000170855 | 1442 | 0.262535 | 1.85E-05 | 0.001937 |
| TAF9           | ENSG00000085231 | 2162 | 0.262797 | 0.00472  | 0.043683 |

|                |                 |      |          |          |          |
|----------------|-----------------|------|----------|----------|----------|
| FLAD1          | ENSG00000160688 | 4019 | 0.26287  | 0.000608 | 0.01298  |
| GOT1           | ENSG00000120053 | 2424 | 0.263131 | 0.001175 | 0.018886 |
| PACSIN2        | ENSG00000100266 | 4548 | 0.263165 | 0.004547 | 0.042706 |
| PSMA2          | ENSG00000256646 | 3068 | 0.263212 | 0.000196 | 0.006911 |
| CHCHD4         | ENSG00000163528 | 1772 | 0.263463 | 0.000256 | 0.008025 |
| PGD            | ENSG00000142657 | 2966 | 0.2635   | 0.003227 | 0.034712 |
| RP11-403P17.6  | ENSG00000277978 | 382  | 0.263708 | 0.00192  | 0.02522  |
| RPA3           | ENSG00000106399 | 3232 | 0.263793 | 0.000336 | 0.009306 |
| ARL6IP1        | ENSG00000170540 | 3666 | 0.263824 | 0.001721 | 0.023695 |
| FBXO10         | ENSG00000147912 | 5997 | 0.26385  | 0.001687 | 0.023357 |
| PRMT5          | ENSG00000100462 | 3467 | 0.263906 | 0.000792 | 0.015052 |
| PHB            | ENSG00000167085 | 3838 | 0.264032 | 0.001085 | 0.018105 |
| PSMC2          | ENSG00000161057 | 3538 | 0.264703 | 0.000251 | 0.007968 |
| IGBP1-AS2      | ENSG00000220925 | 513  | 0.265413 | 0.002031 | 0.026279 |
| C1orf43        | ENSG00000143612 | 2582 | 0.265566 | 4.46E-05 | 0.003216 |
| PLA2G4A        | ENSG00000116711 | 2875 | 0.265954 | 0.000538 | 0.012135 |
| LSM5           | ENSG00000106355 | 4701 | 0.26622  | 0.000324 | 0.009107 |
| CENPN          | ENSG00000166451 | 3568 | 0.266251 | 0.000925 | 0.016461 |
| PRMT5-AS1      | ENSG00000237054 | 2685 | 0.266278 | 0.001251 | 0.019535 |
| RP11-1012A1.4  | ENSG00000258466 | 804  | 0.266285 | 0.001098 | 0.018239 |
| UCHL3          | ENSG00000118939 | 1905 | 0.26655  | 0.000268 | 0.00824  |
| RP11-644F5.11  | ENSG00000258056 | 1443 | 0.266869 | 0.004332 | 0.041534 |
| PNO1           | ENSG00000115946 | 2674 | 0.266944 | 0.001107 | 0.018325 |
| SNRPC          | ENSG00000124562 | 1277 | 0.267116 | 0.000181 | 0.006619 |
| C10orf32-ASMT  | ENSG00000270316 | 2670 | 0.267172 | 0.000673 | 0.013708 |
| MRPS33         | ENSG00000090263 | 1818 | 0.26738  | 0.000833 | 0.015345 |
| FAM162A        | ENSG00000114023 | 3793 | 0.267977 | 0.000279 | 0.008399 |
| CHAC2          | ENSG00000143942 | 1321 | 0.268107 | 0.003639 | 0.037431 |
| MROH8          | ENSG00000101353 | 3878 | 0.268157 | 0.001622 | 0.022793 |
| KIAA0391       | ENSG00000258790 | 3857 | 0.268252 | 0.000109 | 0.005083 |
| AC113189.5     | ENSG00000233223 | 1058 | 0.268338 | 0.000191 | 0.006802 |
| NDUFC1         | ENSG00000109390 | 1941 | 0.268607 | 0.000276 | 0.008351 |
| RPL36A-HNRNPH2 | ENSG00000257529 | 695  | 0.268686 | 0.000598 | 0.012867 |
| MRPL11         | ENSG00000174547 | 2539 | 0.26872  | 0.000583 | 0.012726 |
| NUP37          | ENSG00000075188 | 3492 | 0.268857 | 0.00029  | 0.008612 |
| TMX2           | ENSG00000213593 | 2246 | 0.26902  | 0.000231 | 0.007647 |
| ANAPC13        | ENSG00000129055 | 2359 | 0.269216 | 0.000682 | 0.01379  |
| TIGD4          | ENSG00000169989 | 2472 | 0.269323 | 0.002398 | 0.028865 |
| VRK1           | ENSG00000100749 | 2744 | 0.269327 | 0.002819 | 0.03202  |
| SEN3-EIF4A1    | ENSG00000277957 | 3519 | 0.269404 | 0.001293 | 0.019886 |



|                |                 |      |          |          |          |
|----------------|-----------------|------|----------|----------|----------|
| ATP5C1P1       | ENSG00000224004 | 895  | 0.269468 | 0.004158 | 0.040586 |
| CHCHD2         | ENSG00000106153 | 1132 | 0.269922 | 0.001235 | 0.019421 |
| TMEM116        | ENSG00000198270 | 7989 | 0.269925 | 0.005436 | 0.047734 |
| RPL36A         | ENSG00000241343 | 3964 | 0.270113 | 0.00295  | 0.032817 |
| RP11-518L10.5  | ENSG00000240963 | 642  | 0.270391 | 0.002656 | 0.030797 |
| SLC25A11       | ENSG00000108528 | 2669 | 0.27055  | 0.000975 | 0.016906 |
| TXNDC9         | ENSG00000115514 | 2816 | 0.270635 | 0.000544 | 0.012171 |
| CCT2           | ENSG00000166226 | 4322 | 0.27077  | 0.000298 | 0.008696 |
| APOO           | ENSG00000184831 | 1146 | 0.270799 | 0.001341 | 0.020311 |
| PDCL3          | ENSG00000115539 | 1831 | 0.270933 | 0.000261 | 0.008127 |
| NDUFA2         | ENSG00000131495 | 1488 | 0.271502 | 0.002127 | 0.026998 |
| AC010468.1     | ENSG00000214784 | 817  | 0.271807 | 0.002738 | 0.031391 |
| COA3           | ENSG00000183978 | 1922 | 0.271809 | 2.98E-05 | 0.002623 |
| XPNPEP1        | ENSG00000108039 | 6691 | 0.271903 | 0.002956 | 0.032873 |
| STS            | ENSG00000101846 | 6521 | 0.272103 | 0.000987 | 0.016984 |
| snoU2-30       | ENSG00000273885 | 70   | 0.272308 | 0.000292 | 0.008637 |
| FAM195B        | ENSG00000225663 | 3726 | 0.272981 | 0.005477 | 0.047906 |
| NME1-NME2      | ENSG00000243678 | 2638 | 0.273203 | 0.001367 | 0.020498 |
| TUBA1A         | ENSG00000167552 | 3421 | 0.273279 | 0.001962 | 0.025535 |
| CACYBPP2       | ENSG00000177855 | 678  | 0.274237 | 0.001243 | 0.019468 |
| ASCC1          | ENSG00000138303 | 5586 | 0.274672 | 9.2E-06  | 0.001298 |
| HIST1H1C       | ENSG00000187837 | 642  | 0.274674 | 0.000681 | 0.013776 |
| ATG10          | ENSG00000152348 | 5449 | 0.274805 | 0.002432 | 0.029139 |
| CCT3           | ENSG00000163468 | 4018 | 0.274825 | 2.2E-05  | 0.002133 |
| RP11-234B24.6  | ENSG00000255639 | 1186 | 0.27494  | 0.00069  | 0.013872 |
| NXT1           | ENSG00000132661 | 1123 | 0.275144 | 0.002189 | 0.027408 |
| RPL18AP3       | ENSG00000213442 | 528  | 0.275271 | 0.00494  | 0.044995 |
| RP11-1060J15.4 | ENSG00000256377 | 1519 | 0.275787 | 0.001534 | 0.022056 |
| PSMD8          | ENSG00000099341 | 3105 | 0.275977 | 0.000597 | 0.012861 |
| SNAPIN         | ENSG00000143553 | 1544 | 0.27603  | 0.000114 | 0.005202 |
| ARMCX3         | ENSG00000102401 | 4239 | 0.276097 | 2.72E-05 | 0.002485 |
| COX7B          | ENSG00000131174 | 3024 | 0.276597 | 0.001863 | 0.024805 |
| RPS28          | ENSG00000233927 | 2119 | 0.276675 | 0.000405 | 0.010293 |
| RP4-758J18.2   | ENSG00000224870 | 2525 | 0.276679 | 0.000148 | 0.005859 |
| POLR2G         | ENSG00000168002 | 1923 | 0.277029 | 1.02E-05 | 0.001374 |
| HCRT1          | ENSG00000121764 | 2558 | 0.277043 | 0.002697 | 0.031166 |
| ZDHHC4         | ENSG00000136247 | 3557 | 0.277077 | 2.02E-05 | 0.002044 |
| YARS           | ENSG00000134684 | 8212 | 0.277219 | 0.003642 | 0.037431 |
| CHCHD5         | ENSG00000125611 | 3759 | 0.277658 | 0.003043 | 0.033549 |
| TIMM17B        | ENSG00000126768 | 2562 | 0.277751 | 0.001925 | 0.02527  |
| RPS10-NUDT3    | ENSG00000270800 | 876  | 0.277959 | 0.000593 | 0.012846 |

|                |                 |       |          |          |          |
|----------------|-----------------|-------|----------|----------|----------|
| AL162151.3     | ENSG00000234648 | 158   | 0.278026 | 0.001749 | 0.023914 |
| HSBP1          | ENSG00000230989 | 9525  | 0.278253 | 1.22E-05 | 0.001509 |
| RPN1           | ENSG00000163902 | 3992  | 0.278336 | 0.000265 | 0.008194 |
| EEF1A1         | ENSG00000156508 | 5948  | 0.278409 | 0.000208 | 0.007205 |
| SHFM1          | ENSG00000127922 | 11490 | 0.278461 | 3.99E-06 | 0.000808 |
| CTB-96E2.3     | ENSG00000258924 | 1050  | 0.278894 | 0.000505 | 0.011758 |
| SNRPD1         | ENSG00000167088 | 1841  | 0.278916 | 0.000497 | 0.011616 |
| SMCO4          | ENSG00000166002 | 1223  | 0.279222 | 0.002057 | 0.026499 |
| GYG1           | ENSG00000163754 | 3475  | 0.280098 | 7.74E-06 | 0.001169 |
| RP11-307L3.2   | ENSG00000233846 | 487   | 0.280109 | 0.001127 | 0.018488 |
| ALG8           | ENSG00000159063 | 3448  | 0.280268 | 0.00018  | 0.006608 |
| METTL7B        | ENSG00000170439 | 1506  | 0.280319 | 0.004414 | 0.042036 |
| RPL21          | ENSG00000122026 | 2249  | 0.280637 | 0.002283 | 0.027981 |
| ST6GALNAC1     | ENSG00000070526 | 3448  | 0.280738 | 0.002246 | 0.027751 |
| MAD2L2         | ENSG00000116670 | 3324  | 0.280746 | 0.002556 | 0.030004 |
| LAMTOR2        | ENSG00000116586 | 1438  | 0.280852 | 0.000467 | 0.011143 |
| CTC-297N7.10   | ENSG00000263388 | 171   | 0.280971 | 0.003066 | 0.033692 |
| HSPD1P1        | ENSG00000213430 | 1726  | 0.280989 | 0.000602 | 0.012896 |
| MORF4L2        | ENSG00000123562 | 2648  | 0.280996 | 0.000657 | 0.01357  |
| C4orf3         | ENSG00000279402 | 201   | 0.281372 | 0.000454 | 0.010981 |
| H3F3B          | ENSG00000132475 | 6134  | 0.281592 | 0.000387 | 0.010037 |
| AC016708.2     | ENSG00000230076 | 318   | 0.281775 | 0.002378 | 0.028733 |
| SNRPB          | ENSG00000125835 | 1278  | 0.281895 | 0.003004 | 0.033226 |
| RP11-1100L3.7  | ENSG00000257663 | 647   | 0.282146 | 0.002188 | 0.027401 |
| FAU            | ENSG00000149806 | 1846  | 0.282258 | 0.000378 | 0.009926 |
| RPL4           | ENSG00000174444 | 5637  | 0.282541 | 0.000421 | 0.010495 |
| N6AMT2         | ENSG00000150456 | 1339  | 0.282649 | 0.001487 | 0.021654 |
| RPL26          | ENSG00000161970 | 2472  | 0.282849 | 0.004836 | 0.044309 |
| YBX1P10        | ENSG00000213866 | 975   | 0.28287  | 0.003998 | 0.039592 |
| SSR3           | ENSG00000114850 | 4627  | 0.283052 | 5.95E-05 | 0.0038   |
| SERF2          | ENSG00000140264 | 7347  | 0.283333 | 0.000393 | 0.010124 |
| WDR89          | ENSG00000140006 | 3209  | 0.283403 | 0.000121 | 0.005346 |
| XXcos-LUCA11.5 | ENSG00000272104 | 408   | 0.283726 | 0.00116  | 0.018795 |
| UBB            | ENSG00000170315 | 1621  | 0.283734 | 0.000134 | 0.005606 |
| MMACHC         | ENSG00000132763 | 5296  | 0.28383  | 0.000846 | 0.0155   |
| MIR194-1       | ENSG00000207624 | 85    | 0.284016 | 0.001886 | 0.025006 |
| ATP5J2         | ENSG00000241468 | 2275  | 0.284026 | 0.001747 | 0.023912 |
| TTI2           | ENSG00000129696 | 4222  | 0.28403  | 2.12E-06 | 0.000545 |
| REP15          | ENSG00000174236 | 1078  | 0.284185 | 0.000983 | 0.016953 |
| MMAB           | ENSG00000139428 | 6290  | 0.284195 | 0.002216 | 0.027645 |
| GPR180         | ENSG00000152749 | 8822  | 0.284252 | 0.005501 | 0.047994 |

|              |                 |      |          |          |          |
|--------------|-----------------|------|----------|----------|----------|
| PEF1         | ENSG00000162517 | 2227 | 0.284332 | 0.000374 | 0.00987  |
| AC079742.4   | ENSG00000232581 | 357  | 0.284343 | 0.000341 | 0.009378 |
| MRFAP1       | ENSG00000179010 | 2655 | 0.284562 | 4.31E-06 | 0.000847 |
| TXNDC17      | ENSG00000129235 | 3784 | 0.284991 | 0.001133 | 0.018518 |
| PNPLA3       | ENSG00000100344 | 3232 | 0.284997 | 0.000387 | 0.010037 |
| SPINT2       | ENSG00000167642 | 5199 | 0.285069 | 0.001826 | 0.02453  |
| RBKS         | ENSG00000171174 | 3625 | 0.285308 | 0.000987 | 0.016984 |
| RPS11        | ENSG00000142534 | 1390 | 0.285366 | 0.000365 | 0.009719 |
| NDUFAF1      | ENSG00000137806 | 1790 | 0.285666 | 0.000133 | 0.005604 |
| SLC2A3P1     | ENSG00000253861 | 1451 | 0.285701 | 0.00561  | 0.04851  |
| EIF4A3       | ENSG00000141543 | 4967 | 0.285828 | 0.000118 | 0.0053   |
| KRTCAP2      | ENSG00000163463 | 3826 | 0.285845 | 1.21E-05 | 0.001504 |
| LGALS4       | ENSG00000171747 | 2645 | 0.285853 | 0.004762 | 0.043941 |
| MYL6         | ENSG00000092841 | 4609 | 0.28596  | 0.000254 | 0.008018 |
| CNPY2        | ENSG00000257727 | 2956 | 0.286373 | 3.68E-06 | 0.000781 |
| COA6         | ENSG00000168275 | 1257 | 0.286396 | 0.000456 | 0.011003 |
| MYEOV2       | ENSG00000172428 | 2039 | 0.286407 | 6.21E-05 | 0.003815 |
| RPL24        | ENSG00000114391 | 2682 | 0.286616 | 0.000354 | 0.009558 |
| NDUFAF4      | ENSG00000123545 | 2540 | 0.286743 | 0.00452  | 0.042544 |
| RPL37        | ENSG00000145592 | 8153 | 0.286761 | 0.001084 | 0.018105 |
| RPL15P3      | ENSG00000212802 | 615  | 0.286881 | 0.000329 | 0.009198 |
| RP11-380N8.7 | ENSG00000277368 | 464  | 0.287017 | 0.003097 | 0.033909 |
| CIAPIN1      | ENSG00000005194 | 3509 | 0.287021 | 0.000308 | 0.008834 |
| NEDD8        | ENSG00000129559 | 3879 | 0.28707  | 1.82E-05 | 0.001926 |
| MRPL51       | ENSG00000111639 | 1551 | 0.287213 | 2.96E-05 | 0.002614 |
| ALG5         | ENSG00000120697 | 2194 | 0.287301 | 4.65E-05 | 0.00333  |
| HSP90AA2P    | ENSG00000224411 | 2196 | 0.287301 | 0.005022 | 0.045451 |
| HIST1H3E     | ENSG00000274750 | 411  | 0.287367 | 0.000812 | 0.015212 |
| RBX1         | ENSG00000100387 | 3092 | 0.288147 | 2.84E-05 | 0.002553 |
| LAMTOR5      | ENSG00000134248 | 2388 | 0.288271 | 6.09E-05 | 0.003803 |
| MRPL17       | ENSG00000158042 | 2276 | 0.288317 | 0.000245 | 0.007896 |
| MCTS1        | ENSG00000232119 | 2837 | 0.288332 | 0.000133 | 0.005604 |
| RPS10        | ENSG00000124614 | 1642 | 0.288467 | 0.000507 | 0.011769 |
| ATP5J        | ENSG00000154723 | 2043 | 0.288619 | 0.000355 | 0.00956  |
| NDUFS5       | ENSG00000168653 | 548  | 0.288904 | 0.001004 | 0.017189 |
| MPDU1        | ENSG00000129255 | 3285 | 0.288935 | 7.39E-05 | 0.004224 |
| PRPSAP2      | ENSG00000141127 | 4734 | 0.289019 | 1.1E-05  | 0.001418 |
| HSD17B10     | ENSG00000072506 | 1115 | 0.289065 | 0.001782 | 0.024153 |
| RP11-500M8.7 | ENSG00000272921 | 818  | 0.2892   | 0.000428 | 0.010591 |
| MRPS7        | ENSG00000125445 | 3324 | 0.289249 | 0.000738 | 0.014389 |
| ACAA2        | ENSG00000167315 | 5072 | 0.28929  | 0.000896 | 0.016068 |

|               |                 |       |          |          |          |
|---------------|-----------------|-------|----------|----------|----------|
| AIMP2         | ENSG00000106305 | 1838  | 0.289295 | 0.00018  | 0.006608 |
| EEF1B2        | ENSG00000114942 | 1915  | 0.289345 | 0.000262 | 0.00816  |
| ATP6V1E1      | ENSG00000131100 | 3212  | 0.289404 | 6.12E-05 | 0.003803 |
| CTB-102L5.4   | ENSG00000267748 | 546   | 0.28953  | 0.002114 | 0.02687  |
| RP11-761B3.1  | ENSG00000273269 | 983   | 0.289663 | 0.000648 | 0.013481 |
| RTN3P1        | ENSG00000251333 | 711   | 0.289688 | 0.001009 | 0.017244 |
| PET100        | ENSG00000229833 | 2220  | 0.289842 | 0.000539 | 0.012138 |
| RAN           | ENSG00000132341 | 4825  | 0.290122 | 0.000279 | 0.008399 |
| CTD-2026K11.2 | ENSG00000260206 | 572   | 0.290293 | 0.002752 | 0.03143  |
| ZFAS1         | ENSG00000177410 | 2243  | 0.290377 | 0.00099  | 0.017009 |
| MAGOH         | ENSG00000162385 | 1463  | 0.290659 | 5.57E-06 | 0.000986 |
| RPS27         | ENSG00000177954 | 946   | 0.29086  | 0.00298  | 0.033011 |
| PSMC3         | ENSG00000165916 | 2276  | 0.291189 | 8.03E-05 | 0.004442 |
| RP4-605O3.4   | ENSG00000272368 | 1117  | 0.291348 | 0.00042  | 0.010464 |
| SNRPF         | ENSG00000139343 | 3043  | 0.291351 | 0.000831 | 0.015331 |
| SELK          | ENSG00000113811 | 2165  | 0.291432 | 0.002384 | 0.028747 |
| STOML2        | ENSG00000165283 | 1806  | 0.291933 | 0.000117 | 0.005271 |
| DPM3          | ENSG00000179085 | 622   | 0.291939 | 0.003938 | 0.03918  |
| GPX1          | ENSG00000233276 | 1425  | 0.292174 | 0.001413 | 0.021012 |
| PSMB4         | ENSG00000159377 | 2158  | 0.292498 | 0.00013  | 0.005521 |
| PRDX5         | ENSG00000126432 | 893   | 0.293243 | 0.002217 | 0.027645 |
| NME2          | ENSG00000011052 | 1241  | 0.293267 | 0.000918 | 0.016367 |
| NDC1          | ENSG00000058804 | 5135  | 0.293526 | 0.001784 | 0.024167 |
| NCEH1         | ENSG00000144959 | 4808  | 0.293833 | 0.000236 | 0.007735 |
| ARL3          | ENSG00000138175 | 3844  | 0.294103 | 0.00021  | 0.007234 |
| PSMD10        | ENSG00000101843 | 2459  | 0.294292 | 9.98E-05 | 0.004942 |
| COX5B         | ENSG00000135940 | 1441  | 0.294456 | 0.000665 | 0.013659 |
| LSM1          | ENSG00000175324 | 1690  | 0.294875 | 1.32E-05 | 0.00159  |
| RN7SK         | ENSG00000202198 | 331   | 0.295182 | 0.002532 | 0.029855 |
| COX7C         | ENSG00000127184 | 1993  | 0.295684 | 9.33E-05 | 0.004774 |
| NDUFA12       | ENSG00000184752 | 1815  | 0.295705 | 0.001569 | 0.022314 |
| ERH           | ENSG00000100632 | 1446  | 0.296056 | 0.000131 | 0.005551 |
| LEPROTL1      | ENSG00000104660 | 5421  | 0.296058 | 0.000112 | 0.005147 |
| COX8A         | ENSG00000176340 | 507   | 0.296135 | 0.004594 | 0.042883 |
| NUDT1         | ENSG00000106268 | 2093  | 0.296732 | 0.002816 | 0.032012 |
| RPL10A        | ENSG00000198755 | 1501  | 0.297034 | 0.000679 | 0.013759 |
| FAM3D         | ENSG00000198643 | 1640  | 0.297256 | 0.002702 | 0.031214 |
| NDUFA9        | ENSG00000139180 | 10391 | 0.297425 | 0.000188 | 0.006754 |
| EIF3K         | ENSG00000178982 | 2798  | 0.297866 | 0.00021  | 0.007234 |
| RPL13AP5      | ENSG00000236552 | 612   | 0.297952 | 0.000952 | 0.016723 |
| TMEM263       | ENSG00000151135 | 4768  | 0.298065 | 0.000884 | 0.015941 |

|              |                 |      |          |          |          |
|--------------|-----------------|------|----------|----------|----------|
| YAE1D1       | ENSG00000241127 | 2569 | 0.298104 | 0.004594 | 0.042883 |
| SNORD58B     | ENSG00000271982 | 66   | 0.298123 | 0.000545 | 0.012177 |
| UBA52        | ENSG00000221983 | 4306 | 0.298246 | 7E-05    | 0.004117 |
| ATP6V0E1     | ENSG00000113732 | 1623 | 0.29881  | 2.89E-06 | 0.000669 |
| NDUFC2       | ENSG00000151366 | 2652 | 0.298841 | 9.67E-05 | 0.004873 |
| PRDX1        | ENSG00000117450 | 1522 | 0.298867 | 0.00052  | 0.011906 |
| RP11-123K3.9 | ENSG00000276727 | 701  | 0.298921 | 0.003462 | 0.036346 |
| PSMB1        | ENSG00000008018 | 2256 | 0.299062 | 2.83E-05 | 0.002553 |
| COX14        | ENSG00000178449 | 1073 | 0.299484 | 8.63E-05 | 0.004578 |
| ATP5G1       | ENSG00000159199 | 2615 | 0.299798 | 0.001011 | 0.017262 |
| AC107081.5   | ENSG00000236498 | 802  | 0.300078 | 2.28E-06 | 0.000566 |
| MMADHC       | ENSG00000168288 | 2191 | 0.300335 | 7.24E-05 | 0.004182 |
| NDUFS6       | ENSG00000145494 | 1451 | 0.300598 | 0.000796 | 0.015076 |
| GJB2         | ENSG00000165474 | 2427 | 0.300699 | 0.000813 | 0.015212 |
| TMEM126B     | ENSG00000171204 | 2416 | 0.300814 | 3.6E-05  | 0.002905 |
| C19orf12     | ENSG00000131943 | 5378 | 0.300855 | 0.000909 | 0.016272 |
| SLC25A5      | ENSG00000005022 | 1500 | 0.300951 | 0.000274 | 0.008346 |
| ENO1         | ENSG00000074800 | 3958 | 0.301366 | 0.000274 | 0.008346 |
| EFNA4        | ENSG00000243364 | 1263 | 0.301438 | 0.002768 | 0.031581 |
| NDUFA6       | ENSG00000184983 | 1416 | 0.301482 | 0.00035  | 0.009521 |
| MIR632       | ENSG00000207928 | 94   | 0.301874 | 0.000116 | 0.005253 |
| CROT         | ENSG00000005469 | 4979 | 0.301908 | 0.002595 | 0.030303 |
| SLC50A1      | ENSG00000169241 | 2340 | 0.301921 | 0.004767 | 0.043956 |
| BLOC1S1      | ENSG00000135441 | 1656 | 0.302262 | 0.000163 | 0.006205 |
| MOGAT2       | ENSG00000166391 | 4139 | 0.302348 | 0.004716 | 0.043661 |
| COMMD8       | ENSG00000169019 | 1766 | 0.302774 | 0.000276 | 0.008351 |
| COPS4        | ENSG00000138663 | 3566 | 0.303488 | 3.84E-05 | 0.002967 |
| PSMB6        | ENSG00000142507 | 1448 | 0.303695 | 0.001066 | 0.01789  |
| COX6A1       | ENSG00000111775 | 1344 | 0.303882 | 0.00103  | 0.01745  |
| RPL26L1      | ENSG00000037241 | 1164 | 0.303902 | 0.001111 | 0.01838  |
| SDHD         | ENSG00000204370 | 2509 | 0.304232 | 0.000201 | 0.007056 |
| TMBIM4       | ENSG00000155957 | 4137 | 0.304285 | 1.04E-05 | 0.001378 |
| DNAJB9       | ENSG00000128590 | 2837 | 0.30482  | 0.001499 | 0.021728 |
| DYNLT1       | ENSG00000146425 | 2949 | 0.304943 | 0.00026  | 0.008111 |
| CCL15-CCL14  | ENSG00000275688 | 1047 | 0.304944 | 0.000353 | 0.009555 |
| MSRB1        | ENSG00000198736 | 2157 | 0.305597 | 0.000311 | 0.008861 |
| RPS23        | ENSG00000186468 | 4204 | 0.305694 | 0.001338 | 0.020293 |
| GLA          | ENSG00000102393 | 2065 | 0.305826 | 0.000191 | 0.006802 |
| ATP1B3       | ENSG00000069849 | 2584 | 0.306122 | 0.000942 | 0.016589 |
| HSPA13       | ENSG00000155304 | 4194 | 0.306187 | 0.002969 | 0.032931 |
| PCNA         | ENSG00000132646 | 1471 | 0.306418 | 4.05E-05 | 0.003037 |

|               |                 |       |          |          |          |
|---------------|-----------------|-------|----------|----------|----------|
| ATP6V1C2      | ENSG00000143882 | 3324  | 0.306466 | 0.00058  | 0.012691 |
| TSC22D3       | ENSG00000157514 | 4766  | 0.306779 | 0.003673 | 0.037619 |
| DBI           | ENSG00000155368 | 2444  | 0.306857 | 0.000832 | 0.015331 |
| STEAP1        | ENSG00000164647 | 1625  | 0.306963 | 0.002733 | 0.031391 |
| CTA-292E10.9  | ENSG00000280111 | 24928 | 0.307148 | 0.001444 | 0.021278 |
| ZNFX1-AS1_2   | ENSG00000274760 | 93    | 0.307172 | 0.00195  | 0.025435 |
| PSMA6         | ENSG00000100902 | 6506  | 0.307208 | 6.3E-05  | 0.003815 |
| ELOVL6        | ENSG00000170522 | 7297  | 0.307335 | 0.00449  | 0.042489 |
| PSMA4         | ENSG00000041357 | 6996  | 0.307404 | 7.03E-05 | 0.004117 |
| TMEM38B       | ENSG00000095209 | 4511  | 0.307502 | 0.003478 | 0.036493 |
| RPL30         | ENSG00000156482 | 4027  | 0.307699 | 0.000637 | 0.013347 |
| SNORA5A       | ENSG00000206838 | 134   | 0.307707 | 0.005606 | 0.048489 |
| CCL15         | ENSG00000275718 | 1560  | 0.307887 | 0.00037  | 0.009813 |
| NHP2L1        | ENSG00000100138 | 2780  | 0.307953 | 4.11E-06 | 0.00082  |
| VBPI          | ENSG00000155959 | 2018  | 0.308249 | 7.34E-05 | 0.004222 |
| TMEM101       | ENSG00000091947 | 3029  | 0.308517 | 0.000191 | 0.006802 |
| GAS5          | ENSG00000234741 | 3631  | 0.308887 | 0.00031  | 0.008835 |
| AMD1          | ENSG00000123505 | 7222  | 0.30892  | 0.000455 | 0.010999 |
| ATL2          | ENSG00000119787 | 4885  | 0.308974 | 0.002875 | 0.032351 |
| PYURF         | ENSG00000145337 | 1361  | 0.309223 | 2.64E-07 | 0.000139 |
| ECE2          | ENSG00000145194 | 6552  | 0.309288 | 0.005194 | 0.046564 |
| SNORA71A      | ENSG00000225091 | 134   | 0.309363 | 0.005507 | 0.047998 |
| KLHL13        | ENSG00000003096 | 6983  | 0.309752 | 0.003603 | 0.037183 |
| PDIA6         | ENSG00000143870 | 4101  | 0.309762 | 0.000427 | 0.01057  |
| TRMT10C       | ENSG00000174173 | 1888  | 0.310061 | 8.3E-05  | 0.004484 |
| DLEU2_3       | ENSG00000274878 | 73    | 0.310227 | 0.004916 | 0.044814 |
| CTB-13L3.1    | ENSG00000273299 | 371   | 0.310347 | 0.002318 | 0.028271 |
| TOMM7         | ENSG00000196683 | 1751  | 0.310709 | 9.74E-05 | 0.004884 |
| KIF3B         | ENSG00000101350 | 6103  | 0.310827 | 0.001247 | 0.019503 |
| RNF181        | ENSG00000168894 | 1220  | 0.311646 | 4.05E-05 | 0.003037 |
| RP11-338I21.1 | ENSG00000271933 | 2163  | 0.311792 | 0.001574 | 0.02238  |
| C16orf91      | ENSG00000174109 | 1057  | 0.311982 | 0.001758 | 0.023974 |
| C7orf55       | ENSG00000164898 | 1524  | 0.311984 | 0.000988 | 0.016987 |
| TATDN1        | ENSG00000147687 | 4778  | 0.312085 | 5.92E-05 | 0.003788 |
| CTSH          | ENSG00000103811 | 5892  | 0.31227  | 9.1E-05  | 0.004731 |
| CDC26         | ENSG00000176386 | 1175  | 0.312752 | 1.39E-05 | 0.001625 |
| RPL37A        | ENSG00000197756 | 6841  | 0.313288 | 0.000153 | 0.005998 |
| GPR128        | ENSG00000144820 | 4091  | 0.313507 | 0.000354 | 0.009558 |
| FEN1          | ENSG00000168496 | 2478  | 0.313555 | 0.004188 | 0.040762 |
| TMEM14B       | ENSG00000137210 | 4815  | 0.313591 | 1.25E-07 | 9.8E-05  |
| RP11-3P17.4   | ENSG00000240567 | 2845  | 0.314004 | 0.000332 | 0.009245 |

|                |                 |      |          |          |          |
|----------------|-----------------|------|----------|----------|----------|
| NDUFB1         | ENSG00000183648 | 2263 | 0.314509 | 0.00032  | 0.009035 |
| KRBA2          | ENSG00000263809 | 3087 | 0.314519 | 0.001079 | 0.018056 |
| CREB3          | ENSG00000107175 | 1921 | 0.314912 | 0.004891 | 0.044625 |
| HINT1          | ENSG00000169567 | 1936 | 0.315383 | 4.16E-06 | 0.000823 |
| SFXN4          | ENSG00000183605 | 1868 | 0.315905 | 9.96E-05 | 0.004942 |
| TMEM53         | ENSG00000126106 | 3635 | 0.315914 | 0.000402 | 0.01025  |
| RP11-1017G21.5 | ENSG00000271780 | 1079 | 0.315973 | 0.00077  | 0.014749 |
| RPS18          | ENSG00000231500 | 1898 | 0.316044 | 0.000832 | 0.015331 |
| PPIB           | ENSG00000166794 | 1911 | 0.316129 | 0.000379 | 0.00993  |
| TMEM261        | ENSG00000137038 | 3000 | 0.316258 | 6.06E-05 | 0.003803 |
| RP11-90P5.2    | ENSG00000253356 | 562  | 0.316328 | 6.94E-05 | 0.004092 |
| RNF7           | ENSG00000114125 | 3147 | 0.316522 | 4.39E-05 | 0.003193 |
| C19orf10       | ENSG00000074842 | 1678 | 0.316812 | 0.003016 | 0.033331 |
| TMEM147        | ENSG00000105677 | 1932 | 0.317489 | 0.000251 | 0.007968 |
| C14orf2        | ENSG00000156411 | 3415 | 0.317491 | 0.000182 | 0.006639 |
| TARS           | ENSG00000113407 | 5718 | 0.317559 | 0.002533 | 0.029855 |
| SNX22          | ENSG00000157734 | 5767 | 0.317598 | 0.000483 | 0.011392 |
| WDR83OS        | ENSG00000105583 | 2656 | 0.317742 | 0.000221 | 0.007424 |
| COMMD6         | ENSG00000188243 | 2897 | 0.317796 | 6.01E-05 | 0.003803 |
| SNORD6         | ENSG00000202314 | 73   | 0.31787  | 0.001377 | 0.020611 |
| KCNK3          | ENSG00000171303 | 6223 | 0.317982 | 0.000508 | 0.011777 |
| TAF1D          | ENSG00000166012 | 8420 | 0.318142 | 0.000105 | 0.005013 |
| PSMA7          | ENSG00000101182 | 1750 | 0.318469 | 0.000241 | 0.007839 |
| TMEM14A        | ENSG00000096092 | 992  | 0.31865  | 0.00038  | 0.009936 |
| AC079922.2     | ENSG00000231747 | 359  | 0.318665 | 0.005866 | 0.049897 |
| MARS           | ENSG00000166986 | 7028 | 0.31896  | 0.000608 | 0.01298  |
| COQ3           | ENSG00000132423 | 1458 | 0.318994 | 0.000142 | 0.005755 |
| H2AFJ          | ENSG00000246705 | 3356 | 0.319258 | 0.000528 | 0.012001 |
| RP11-864N7.2   | ENSG00000227615 | 399  | 0.319328 | 0.000159 | 0.006121 |
| SRSF7          | ENSG00000115875 | 4045 | 0.319485 | 1.14E-08 | 1.64E-05 |
| RPL13A         | ENSG00000142541 | 2369 | 0.319677 | 0.000274 | 0.008344 |
| RP13-753N3.3   | ENSG00000275185 | 542  | 0.319983 | 4.04E-05 | 0.003037 |
| ASNA1          | ENSG00000198356 | 1652 | 0.320007 | 0.000265 | 0.008194 |
| RPS23P8        | ENSG00000230629 | 330  | 0.320343 | 0.000533 | 0.01207  |
| RPS19          | ENSG00000105372 | 3805 | 0.320519 | 0.000201 | 0.007056 |
| NDUFAB1        | ENSG00000004779 | 1600 | 0.320801 | 0.000155 | 0.006076 |
| RP11-201K10.3  | ENSG00000273088 | 753  | 0.320944 | 6.21E-06 | 0.001068 |
| HAX1           | ENSG00000143575 | 2155 | 0.321269 | 9.26E-06 | 0.001298 |
| CCDC175        | ENSG00000151838 | 3245 | 0.32175  | 0.000698 | 0.013945 |
| SNRPE          | ENSG00000182004 | 1474 | 0.321906 | 0.000288 | 0.0086   |
| HIST1H4I       | ENSG00000276180 | 1294 | 0.322027 | 0.003537 | 0.036851 |

|                |                 |      |          |          |          |
|----------------|-----------------|------|----------|----------|----------|
| TMEM135        | ENSG00000166575 | 5030 | 0.322035 | 0.000233 | 0.007689 |
| CLRN3          | ENSG00000180745 | 1152 | 0.322603 | 0.000213 | 0.007271 |
| PANK1          | ENSG00000152782 | 7638 | 0.322623 | 0.001914 | 0.025178 |
| HNRNPCP2       | ENSG00000204253 | 881  | 0.323266 | 1.81E-05 | 0.001926 |
| NSMCE1         | ENSG00000169189 | 3770 | 0.323398 | 1.32E-05 | 0.00159  |
| BTD            | ENSG00000169814 | 3704 | 0.323425 | 0.000772 | 0.014765 |
| ATP5E          | ENSG00000124172 | 5126 | 0.324041 | 1.18E-05 | 0.001484 |
| MIR4680        | ENSG00000265827 | 66   | 0.324046 | 0.000318 | 0.009012 |
| TMEM106C       | ENSG00000134291 | 3475 | 0.324196 | 9.78E-05 | 0.004896 |
| CTSB           | ENSG00000164733 | 7428 | 0.32457  | 0.000122 | 0.005346 |
| RP11-573D15.9  | ENSG00000263826 | 2400 | 0.324626 | 4.65E-05 | 0.00333  |
| ACSL5          | ENSG00000197142 | 4236 | 0.325781 | 0.003399 | 0.035932 |
| ATP6V1D        | ENSG00000100554 | 4251 | 0.325896 | 0.000109 | 0.00508  |
| RPSAP15        | ENSG00000237506 | 861  | 0.325904 | 0.002696 | 0.031166 |
| C14orf142      | ENSG00000170270 | 1154 | 0.327225 | 2.29E-05 | 0.00217  |
| AGR3           | ENSG00000173467 | 1160 | 0.327306 | 0.001351 | 0.020379 |
| ANAPC11        | ENSG00000141552 | 4027 | 0.32742  | 0.000698 | 0.013945 |
| PSMA5          | ENSG00000143106 | 5724 | 0.327534 | 1.32E-05 | 0.00159  |
| ST13P6         | ENSG00000225259 | 1102 | 0.327554 | 0.000107 | 0.005039 |
| KCTD14         | ENSG00000151364 | 2702 | 0.32825  | 9.01E-05 | 0.004712 |
| RPLP0          | ENSG00000089157 | 4001 | 0.328633 | 0.000114 | 0.005197 |
| SNHG1          | ENSG00000255717 | 3756 | 0.329721 | 0.000286 | 0.008537 |
| XX-FW83563B9.5 | ENSG00000280195 | 1939 | 0.329833 | 0.00055  | 0.012245 |
| RPS15A         | ENSG00000134419 | 6679 | 0.330458 | 0.000212 | 0.00727  |
| RPL29P11       | ENSG00000224858 | 492  | 0.330917 | 0.004529 | 0.042595 |
| SSR4           | ENSG00000180879 | 4590 | 0.331032 | 0.00071  | 0.01408  |
| WDR38          | ENSG00000136918 | 1387 | 0.331162 | 0.000303 | 0.008738 |
| NDUFA11        | ENSG00000174886 | 4839 | 0.331769 | 0.000269 | 0.00824  |
| SLC20A2        | ENSG00000168575 | 6641 | 0.331791 | 0.001864 | 0.024805 |
| RP11-87F15.2   | ENSG00000248980 | 610  | 0.332111 | 7.23E-05 | 0.004182 |
| RP11-637O19.3  | ENSG00000272162 | 1589 | 0.332574 | 0.001328 | 0.020251 |
| PNPLA4         | ENSG00000006757 | 3441 | 0.33259  | 0.002318 | 0.028271 |
| MSL3P1         | ENSG00000224287 | 2278 | 0.333476 | 0.004122 | 0.040341 |
| NDUFC2-KCTD14  | ENSG00000259112 | 731  | 0.333788 | 7.73E-05 | 0.004357 |
| AL132780.1     | ENSG00000207765 | 109  | 0.334184 | 0.000873 | 0.015849 |
| FAM103A1       | ENSG00000169612 | 1568 | 0.334538 | 1.16E-05 | 0.001471 |
| FAM50B         | ENSG00000145945 | 1932 | 0.33478  | 0.001509 | 0.021834 |
| PEX11A         | ENSG00000166821 | 3171 | 0.334782 | 0.001335 | 0.020271 |
| ATP5L          | ENSG00000167283 | 3382 | 0.334852 | 2.71E-05 | 0.002483 |
| BOLA3          | ENSG00000163170 | 3156 | 0.335113 | 0.001851 | 0.024726 |
| RP11-613H2.2   | ENSG00000253899 | 1283 | 0.335476 | 0.000405 | 0.010294 |



|                |                 |      |          |          |          |
|----------------|-----------------|------|----------|----------|----------|
| SF3B5          | ENSG00000169976 | 693  | 0.33572  | 7.05E-05 | 0.004117 |
| SLIRP          | ENSG00000119705 | 2631 | 0.335856 | 2.32E-05 | 0.002185 |
| NDUFB9         | ENSG00000147684 | 2629 | 0.336532 | 0.000145 | 0.005806 |
| AC005538.3     | ENSG00000279809 | 1864 | 0.336671 | 0.004036 | 0.039851 |
| NUTF2          | ENSG00000102898 | 3895 | 0.336769 | 2.73E-05 | 0.002487 |
| UQCRH          | ENSG00000173660 | 1408 | 0.336904 | 0.000131 | 0.005535 |
| C17orf100      | ENSG00000256806 | 1756 | 0.336917 | 0.003973 | 0.039428 |
| RP11-1035H13.3 | ENSG00000260342 | 764  | 0.336919 | 7.61E-06 | 0.001163 |
| TMSB4X         | ENSG00000205542 | 1705 | 0.337027 | 6.1E-05  | 0.003803 |
| GALE           | ENSG00000117308 | 3978 | 0.337226 | 0.003484 | 0.036524 |
| WRB            | ENSG00000182093 | 5558 | 0.337386 | 0.000102 | 0.004972 |
| RPL10          | ENSG00000147403 | 4825 | 0.337622 | 5.81E-05 | 0.003767 |
| RPS12          | ENSG00000112306 | 767  | 0.337861 | 0.000101 | 0.004971 |
| SNORA72        | ENSG00000245970 | 1989 | 0.337988 | 0.000459 | 0.011016 |
| NDUFB7         | ENSG00000099795 | 531  | 0.338142 | 0.001085 | 0.018105 |
| MIR3656        | ENSG00000266398 | 69   | 0.338195 | 0.005312 | 0.047152 |
| PHB2           | ENSG00000215021 | 2499 | 0.338204 | 0.000227 | 0.007585 |
| PSENFEN        | ENSG00000205155 | 1845 | 0.338869 | 0.000105 | 0.005013 |
| SLC9B1         | ENSG00000164037 | 2977 | 0.338901 | 5.07E-05 | 0.00351  |
| RPS4X          | ENSG00000198034 | 2982 | 0.339108 | 0.00033  | 0.009198 |
| USMG5          | ENSG00000173915 | 898  | 0.339175 | 0.000647 | 0.013478 |
| MRPL15         | ENSG00000137547 | 1191 | 0.339192 | 6.55E-06 | 0.001113 |
| TMEM216        | ENSG00000187049 | 2364 | 0.339478 | 8.38E-07 | 0.000318 |
| TMEM141        | ENSG00000244187 | 1443 | 0.3396   | 0.003765 | 0.038179 |
| COX6C          | ENSG00000164919 | 3066 | 0.340342 | 7.83E-05 | 0.00438  |
| DCTPP1         | ENSG00000179958 | 1581 | 0.340642 | 3.71E-05 | 0.002942 |
| CTD-2540B15.11 | ENSG00000267580 | 659  | 0.34073  | 0.003181 | 0.034431 |
| SPCS2P4        | ENSG00000228589 | 681  | 0.341599 | 1.47E-06 | 0.000468 |
| RPS3           | ENSG00000149273 | 5894 | 0.341829 | 2.13E-05 | 0.00211  |
| C12orf5        | ENSG00000078237 | 3023 | 0.341954 | 0.000818 | 0.015231 |
| NAA38          | ENSG00000183011 | 1943 | 0.342377 | 4.91E-05 | 0.003429 |
| AL021546.6     | ENSG00000111780 | 552  | 0.342423 | 0.000843 | 0.015477 |
| SYP            | ENSG00000102003 | 5215 | 0.34265  | 0.001615 | 0.022774 |
| NDUFA8         | ENSG00000119421 | 844  | 0.343126 | 5.43E-06 | 0.000971 |
| RPL7           | ENSG00000147604 | 2907 | 0.343346 | 4.24E-05 | 0.003141 |
| TMEM208        | ENSG00000168701 | 1787 | 0.343666 | 0.000493 | 0.011582 |
| MRPL13         | ENSG00000172172 | 4209 | 0.34436  | 1.73E-06 | 0.000494 |
| RP11-540D14.8  | ENSG00000251246 | 1042 | 0.344479 | 0.00081  | 0.015195 |
| GARS           | ENSG00000106105 | 4152 | 0.344874 | 0.003828 | 0.038493 |
| RP11-104J23.1  | ENSG00000275944 | 1919 | 0.344878 | 0.00013  | 0.005521 |
| RTN4IP1        | ENSG00000130347 | 1974 | 0.345083 | 4.48E-06 | 0.00086  |

|               |                 |       |          |          |          |
|---------------|-----------------|-------|----------|----------|----------|
| ATP5O         | ENSG00000241837 | 3336  | 0.346036 | 6.23E-05 | 0.003815 |
| B3GALNT1      | ENSG00000169255 | 4183  | 0.346044 | 0.003684 | 0.037655 |
| HIF0          | ENSG00000189060 | 2344  | 0.34607  | 0.004079 | 0.040069 |
| RP11-745O10.4 | ENSG00000228144 | 984   | 0.346089 | 3.04E-06 | 0.000698 |
| TCEB2         | ENSG00000103363 | 1128  | 0.346182 | 0.000267 | 0.00824  |
| UQCR11        | ENSG00000267059 | 1002  | 0.346575 | 6.09E-05 | 0.003803 |
| CFAP57        | ENSG00000243710 | 5764  | 0.346806 | 0.002619 | 0.030524 |
| TMED9         | ENSG00000184840 | 2440  | 0.347619 | 0.001281 | 0.019765 |
| SLC51B        | ENSG00000186198 | 940   | 0.347851 | 0.000355 | 0.00956  |
| RPL27A        | ENSG00000166441 | 7193  | 0.347854 | 7.98E-06 | 0.001192 |
| ATP6V0B       | ENSG00000117410 | 3535  | 0.348055 | 0.000933 | 0.016541 |
| FARSA-AS1     | ENSG00000266975 | 241   | 0.348078 | 0.000945 | 0.01664  |
| CRYBA2        | ENSG00000163499 | 1454  | 0.348323 | 0.00539  | 0.047525 |
| PPIL1         | ENSG00000137168 | 1810  | 0.34884  | 0.000979 | 0.016923 |
| MRPL34        | ENSG00000130312 | 1686  | 0.349343 | 5.84E-05 | 0.003767 |
| SNORA12       | ENSG00000212464 | 147   | 0.349388 | 0.00535  | 0.047351 |
| RBP1          | ENSG00000114115 | 3905  | 0.349663 | 0.00366  | 0.037568 |
| SNORD18C      | ENSG00000199574 | 69    | 0.349686 | 0.003362 | 0.035639 |
| SNRPD2        | ENSG00000125743 | 1608  | 0.349845 | 3.93E-05 | 0.002999 |
| CTD-2215E18.1 | ENSG00000251513 | 1793  | 0.34993  | 0.001902 | 0.025119 |
| CETN2         | ENSG00000147400 | 1928  | 0.350041 | 0.000729 | 0.014283 |
| CNGA3         | ENSG00000144191 | 4378  | 0.350717 | 0.005245 | 0.046852 |
| SMC2-AS1      | ENSG00000270332 | 7619  | 0.351146 | 0.004506 | 0.042503 |
| SLC25A20      | ENSG00000178537 | 1982  | 0.351593 | 3.18E-05 | 0.002755 |
| MPC1          | ENSG00000060762 | 1546  | 0.351671 | 0.000726 | 0.014282 |
| RP11-110J1.2  | ENSG00000237842 | 1531  | 0.351812 | 3.32E-05 | 0.002792 |
| FLRT3         | ENSG00000125848 | 5190  | 0.351821 | 0.003029 | 0.033442 |
| RP11-303E16.8 | ENSG00000260643 | 773   | 0.352306 | 0.002736 | 0.031391 |
| CKS1B         | ENSG00000173207 | 2338  | 0.353232 | 8.75E-07 | 0.000323 |
| AC024592.12   | ENSG00000267740 | 2193  | 0.353426 | 0.000104 | 0.005013 |
| XBP1          | ENSG00000100219 | 3028  | 0.353738 | 0.000973 | 0.016885 |
| RSPH10B       | ENSG00000155026 | 4993  | 0.353917 | 0.003737 | 0.037967 |
| RP11-127I20.5 | ENSG00000267077 | 720   | 0.354135 | 0.000924 | 0.016451 |
| KCTD16        | ENSG00000183775 | 14294 | 0.35415  | 0.005456 | 0.047798 |
| SNORD12C      | ENSG00000209042 | 89    | 0.354553 | 0.003242 | 0.034763 |
| TMEM187       | ENSG00000177854 | 1924  | 0.354603 | 0.000361 | 0.009649 |
| LINC00649     | ENSG00000237945 | 14130 | 0.355132 | 0.000219 | 0.007419 |
| TUBA1B        | ENSG00000123416 | 3574  | 0.355395 | 0.001895 | 0.025074 |
| MINOS1        | ENSG00000173436 | 5227  | 0.355902 | 1.78E-07 | 0.000118 |
| COPB1         | ENSG00000129083 | 5131  | 0.355907 | 0.000213 | 0.007275 |
| RPS13         | ENSG00000110700 | 2186  | 0.355953 | 6.75E-05 | 0.004015 |

|                |                 |       |          |          |          |
|----------------|-----------------|-------|----------|----------|----------|
| IARS           | ENSG00000196305 | 7361  | 0.355977 | 0.001358 | 0.020422 |
| EDARADD        | ENSG00000186197 | 3726  | 0.356168 | 0.002254 | 0.027817 |
| SNRPG          | ENSG00000143977 | 1795  | 0.356489 | 0.000105 | 0.005013 |
| PSMB8          | ENSG00000204264 | 2006  | 0.356851 | 0.000502 | 0.011705 |
| HSPE1          | ENSG00000115541 | 1977  | 0.357823 | 3.82E-05 | 0.002964 |
| RTCB           | ENSG00000100220 | 2948  | 0.35843  | 1.15E-05 | 0.001467 |
| SNORD49A       | ENSG00000277370 | 71    | 0.358485 | 6.91E-06 | 0.001124 |
| POMP           | ENSG00000132963 | 1428  | 0.358582 | 4.03E-05 | 0.003037 |
| ZNRD1          | ENSG00000066379 | 3672  | 0.359045 | 4.63E-06 | 0.000878 |
| HSPA4L         | ENSG00000164070 | 11621 | 0.359258 | 0.001258 | 0.019567 |
| RP11-324O2.3   | ENSG00000232934 | 1120  | 0.36032  | 0.001667 | 0.023196 |
| SMIM6          | ENSG00000259120 | 1086  | 0.360582 | 0.001251 | 0.019535 |
| MAD2L1         | ENSG00000164109 | 5748  | 0.360704 | 0.005166 | 0.046389 |
| LMO7-AS1       | ENSG00000261105 | 593   | 0.361491 | 1.72E-05 | 0.001862 |
| KPNA2          | ENSG00000182481 | 3140  | 0.361635 | 0.003633 | 0.037412 |
| CTC-260F20.3   | ENSG00000258674 | 1846  | 0.361656 | 6.16E-05 | 0.003815 |
| SSTR2          | ENSG00000180616 | 7852  | 0.361741 | 0.000232 | 0.007671 |
| CTD-3148I10.15 | ENSG00000273189 | 1421  | 0.361813 | 0.001086 | 0.018105 |
| RPL35A         | ENSG00000182899 | 2977  | 0.361888 | 3.71E-05 | 0.002942 |
| SEC11C         | ENSG00000166562 | 4511  | 0.362001 | 0.000251 | 0.007973 |
| AC108479.3     | ENSG00000275955 | 127   | 0.362123 | 0.000245 | 0.007896 |
| OSTC           | ENSG00000198856 | 1617  | 0.362225 | 1.97E-05 | 0.002008 |
| TOMM5          | ENSG00000175768 | 3644  | 0.362514 | 7.19E-06 | 0.001136 |
| NDUFA13        | ENSG00000186010 | 2708  | 0.362807 | 5.52E-05 | 0.00368  |
| NPM3           | ENSG00000107833 | 928   | 0.363619 | 0.003823 | 0.038482 |
| SLC39A8        | ENSG00000138821 | 6480  | 0.364395 | 0.005681 | 0.048919 |
| NDUFA4         | ENSG00000189043 | 3556  | 0.364583 | 7.59E-05 | 0.004295 |
| HIST1H4E       | ENSG00000276966 | 312   | 0.364612 | 0.000528 | 0.012001 |
| HIST1H2AM      | ENSG00000278677 | 393   | 0.365156 | 0.00263  | 0.030582 |
| HIST4H4        | ENSG00000197837 | 2578  | 0.368477 | 6.51E-05 | 0.003911 |
| SNORA58        | ENSG00000201129 | 136   | 0.368644 | 0.003817 | 0.038438 |
| MRPL54         | ENSG00000183617 | 1003  | 0.368783 | 6.32E-05 | 0.003815 |
| FUNDC1         | ENSG00000069509 | 1399  | 0.369064 | 0.000963 | 0.016814 |
| RPS7           | ENSG00000171863 | 5583  | 0.369619 | 3.94E-06 | 0.000804 |
| RP11-269F19.2  | ENSG00000225721 | 765   | 0.369848 | 9.28E-05 | 0.004774 |
| RRAGA          | ENSG00000155876 | 1589  | 0.370138 | 1.36E-05 | 0.001625 |
| RP11-663P9.2   | ENSG00000124399 | 390   | 0.371143 | 0.002463 | 0.029312 |
| CTD-2287O16.1  | ENSG00000185641 | 373   | 0.371715 | 4.21E-05 | 0.003129 |
| PIGY           | ENSG00000255072 | 217   | 0.372604 | 1.04E-07 | 8.34E-05 |
| SCG2           | ENSG00000171951 | 2719  | 0.372938 | 0.003936 | 0.039173 |
| SRPRB          | ENSG00000144867 | 4180  | 0.373154 | 4.84E-05 | 0.00341  |

|                |                 |      |          |          |          |
|----------------|-----------------|------|----------|----------|----------|
| AP000304.12    | ENSG00000249209 | 1078 | 0.37438  | 3.74E-05 | 0.002942 |
| SMIM22         | ENSG00000267795 | 1762 | 0.374456 | 0.000588 | 0.01278  |
| PARK7          | ENSG00000116288 | 2397 | 0.375141 | 2.29E-07 | 0.000133 |
| CHRNA5         | ENSG00000169684 | 3623 | 0.375526 | 0.003755 | 0.038108 |
| MTFP1          | ENSG00000242114 | 1696 | 0.37582  | 0.000191 | 0.006802 |
| SNORA28        | ENSG00000272533 | 126  | 0.376237 | 0.000609 | 0.012984 |
| RP11-172H24.4  | ENSG00000278291 | 4412 | 0.37675  | 0.001687 | 0.023357 |
| TMEM70         | ENSG00000175606 | 2982 | 0.376857 | 5.36E-07 | 0.000231 |
| ZDHHC2         | ENSG00000104219 | 6735 | 0.377189 | 0.005274 | 0.046955 |
| RP11-386G11.10 | ENSG00000258017 | 1632 | 0.37724  | 0.001689 | 0.02336  |
| FBXO6          | ENSG00000116663 | 1811 | 0.377357 | 0.00045  | 0.010918 |
| RPL24P4        | ENSG00000181524 | 421  | 0.377616 | 0.00012  | 0.005334 |
| HIST1H4K       | ENSG00000273542 | 312  | 0.377729 | 0.001033 | 0.017454 |
| RPS27A         | ENSG00000143947 | 3130 | 0.377911 | 2.56E-06 | 0.000625 |
| MDH1           | ENSG00000014641 | 4990 | 0.377972 | 2.27E-07 | 0.000133 |
| COX11P1        | ENSG00000231162 | 835  | 0.378562 | 0.002724 | 0.031384 |
| AARS           | ENSG00000090861 | 4498 | 0.379196 | 0.000159 | 0.006121 |
| RPS3AP6        | ENSG00000234797 | 795  | 0.379392 | 2.09E-05 | 0.002086 |
| ATP5G3         | ENSG00000154518 | 6780 | 0.379451 | 0.000104 | 0.005013 |
| IFT20          | ENSG00000109083 | 3227 | 0.379502 | 7.58E-05 | 0.004295 |
| RPL22L1        | ENSG00000163584 | 2326 | 0.379539 | 0.000234 | 0.007713 |
| RPS21          | ENSG00000171858 | 1023 | 0.379566 | 5.1E-05  | 0.003514 |
| PSMB3          | ENSG00000277791 | 1179 | 0.379608 | 1.71E-06 | 0.000494 |
| CTC-518P12.6   | ENSG00000267484 | 511  | 0.379873 | 0.002062 | 0.026538 |
| RPS3A          | ENSG00000145425 | 2341 | 0.381102 | 2.05E-06 | 0.000536 |
| CLCN4          | ENSG00000073464 | 6789 | 0.381179 | 0.002069 | 0.026558 |
| NDUFA1         | ENSG00000125356 | 766  | 0.38156  | 9.57E-06 | 0.001316 |
| NDUFB6         | ENSG00000165264 | 1388 | 0.381917 | 1.61E-05 | 0.001799 |
| RPL26P30       | ENSG00000236264 | 645  | 0.382128 | 0.000246 | 0.007896 |
| RPL32          | ENSG00000144713 | 3720 | 0.382463 | 3.24E-05 | 0.00276  |
| SRGN           | ENSG00000122862 | 1220 | 0.382798 | 0.003968 | 0.039397 |
| NDUFB2         | ENSG00000090266 | 4447 | 0.382878 | 3.13E-07 | 0.000158 |
| TMEM126A       | ENSG00000171202 | 971  | 0.382922 | 1.7E-06  | 0.000494 |
| DNAJC17        | ENSG00000104129 | 5633 | 0.383129 | 0.003915 | 0.03906  |
| TIMM17A        | ENSG00000134375 | 3513 | 0.384155 | 8.76E-05 | 0.004621 |
| ATP6V1G1       | ENSG00000136888 | 1305 | 0.384482 | 0.00012  | 0.005334 |
| HIST2H2AB      | ENSG00000184270 | 393  | 0.38454  | 0.003223 | 0.034693 |
| PFDN2          | ENSG00000143256 | 677  | 0.384604 | 8.87E-05 | 0.004674 |
| SCARNA21       | ENSG00000252835 | 139  | 0.385362 | 0.000508 | 0.011777 |
| RPSAP6         | ENSG00000214629 | 882  | 0.385555 | 0.001641 | 0.022974 |
| RNU6-398P      | ENSG00000206870 | 109  | 0.385847 | 0.000196 | 0.006911 |

|               |                 |      |          |          |          |
|---------------|-----------------|------|----------|----------|----------|
| RP11-650L12.2 | ENSG00000261762 | 2154 | 0.386034 | 0.002941 | 0.032764 |
| DBNDD2        | ENSG00000244274 | 2764 | 0.386158 | 0.000111 | 0.00512  |
| RPS14         | ENSG00000164587 | 4544 | 0.386415 | 6.94E-05 | 0.004092 |
| QPCT          | ENSG00000115828 | 2599 | 0.386822 | 0.000242 | 0.007852 |
| RPL39L        | ENSG00000163923 | 1060 | 0.38778  | 0.003788 | 0.038272 |
| TIMM8B        | ENSG00000150779 | 1166 | 0.388106 | 2.06E-06 | 0.000536 |
| SYP-AS1       | ENSG00000237341 | 542  | 0.388799 | 0.000726 | 0.014282 |
| CDK1          | ENSG00000170312 | 3931 | 0.389727 | 0.004514 | 0.042518 |
| TAS2R46       | ENSG00000226761 | 930  | 0.389867 | 0.004196 | 0.040784 |
| SLC25A5-AS1   | ENSG00000224281 | 3065 | 0.390255 | 0.001349 | 0.020377 |
| RP11-613M10.8 | ENSG00000256966 | 3217 | 0.390283 | 1.14E-06 | 0.000396 |
| COX7A2L       | ENSG00000115944 | 5605 | 0.390951 | 1.37E-06 | 0.000446 |
| C12orf57      | ENSG00000111678 | 1806 | 0.390951 | 5.6E-05  | 0.00368  |
| CD63          | ENSG00000135404 | 2633 | 0.390995 | 1.01E-05 | 0.001367 |
| RPS5          | ENSG00000083845 | 3617 | 0.391293 | 8.07E-05 | 0.004442 |
| TSPAN6        | ENSG00000000003 | 4535 | 0.391781 | 0.000145 | 0.005803 |
| DAD1          | ENSG00000129562 | 808  | 0.392121 | 8.49E-05 | 0.004544 |
| SNORD97       | ENSG00000255125 | 441  | 0.392922 | 0.004571 | 0.042815 |
| RNase_MRP     | ENSG00000277027 | 264  | 0.39313  | 0.000411 | 0.010339 |
| RMRP          | ENSG00000269900 | 268  | 0.393137 | 0.00041  | 0.010339 |
| IFI30         | ENSG00000216490 | 2481 | 0.394024 | 8.66E-05 | 0.004578 |
| HIST1H3J      | ENSG00000197153 | 775  | 0.395104 | 0.004265 | 0.041215 |
| RP11-793I11.1 | ENSG00000254780 | 285  | 0.395222 | 0.000176 | 0.006536 |
| HLTF-AS1      | ENSG00000239718 | 415  | 0.39552  | 0.004089 | 0.04014  |
| RPL9          | ENSG00000163682 | 3259 | 0.395603 | 0.000124 | 0.005421 |
| U4            | ENSG00000272160 | 135  | 0.395985 | 0.000236 | 0.007735 |
| SERPINI1      | ENSG00000163536 | 2418 | 0.39611  | 0.004705 | 0.043626 |
| IL17D         | ENSG00000172458 | 3327 | 0.396379 | 0.001169 | 0.01884  |
| RNU11         | ENSG00000270103 | 131  | 0.396985 | 0.000902 | 0.016153 |
| PPP1R14D      | ENSG00000166143 | 873  | 0.397021 | 3.4E-05  | 0.002844 |
| RPL31         | ENSG00000071082 | 5791 | 0.397765 | 1.37E-05 | 0.001625 |
| UQCR10        | ENSG00000184076 | 975  | 0.398111 | 1.51E-05 | 0.001724 |
| U11           | ENSG00000274978 | 134  | 0.398393 | 0.000876 | 0.015873 |
| CDKN1C        | ENSG00000129757 | 2586 | 0.398756 | 0.001543 | 0.022125 |
| RDH11         | ENSG00000072042 | 5518 | 0.399653 | 0.005015 | 0.045419 |
| PSMB5         | ENSG00000100804 | 1765 | 0.399674 | 2.09E-05 | 0.002086 |
| SLC25A42      | ENSG00000181035 | 4519 | 0.4001   | 0.003602 | 0.037183 |
| C19orf70      | ENSG00000174917 | 1854 | 0.400511 | 7.55E-05 | 0.004295 |
| SNX6P1        | ENSG00000267920 | 1224 | 0.400704 | 0.001012 | 0.017266 |
| CHCHD1        | ENSG00000172586 | 1483 | 0.40216  | 1.43E-07 | 0.000103 |
| AC021037.1    | ENSG00000273577 | 87   | 0.402555 | 0.00015  | 0.005911 |

|               |                 |      |          |          |          |
|---------------|-----------------|------|----------|----------|----------|
| FDFT1         | ENSG00000079459 | 5202 | 0.403156 | 0.000143 | 0.005757 |
| PLS3          | ENSG00000102024 | 4145 | 0.404992 | 0.000612 | 0.013028 |
| LEAP2         | ENSG00000164406 | 2405 | 0.405308 | 0.002229 | 0.027667 |
| SYS1-DBNDD2   | ENSG00000254806 | 1402 | 0.40534  | 5.08E-05 | 0.00351  |
| PMVK          | ENSG00000163344 | 1280 | 0.405619 | 0.000507 | 0.011777 |
| SLC7A5        | ENSG00000103257 | 4745 | 0.405763 | 0.00252  | 0.029831 |
| RPL41P2       | ENSG00000256338 | 409  | 0.406612 | 0.000112 | 0.005147 |
| SNORD17       | ENSG00000212232 | 237  | 0.40784  | 0.001221 | 0.019323 |
| RPL34         | ENSG00000109475 | 3393 | 0.408586 | 3.86E-06 | 0.000804 |
| CDKN3         | ENSG00000100526 | 1836 | 0.408602 | 0.001988 | 0.025837 |
| LRRC31        | ENSG00000114248 | 3113 | 0.408863 | 0.000306 | 0.008785 |
| CYCS          | ENSG00000172115 | 4457 | 0.409884 | 0.000399 | 0.010193 |
| AC005387.3    | ENSG00000268938 | 352  | 0.411309 | 0.004015 | 0.039715 |
| CCL28         | ENSG00000151882 | 4524 | 0.411401 | 0.000302 | 0.008715 |
| WBP5          | ENSG00000185222 | 1096 | 0.412549 | 0.00344  | 0.036185 |
| GPD1          | ENSG00000167588 | 3991 | 0.413337 | 0.002171 | 0.027278 |
| RNU7-1        | ENSG00000272173 | 1097 | 0.413683 | 3.3E-05  | 0.002786 |
| MRPL14        | ENSG00000180992 | 959  | 0.414076 | 1.03E-05 | 0.001378 |
| RP1-506.5     | ENSG00000235246 | 297  | 0.414225 | 0.000496 | 0.011614 |
| TMEM258       | ENSG00000134825 | 3068 | 0.414789 | 2.04E-06 | 0.000536 |
| STYK1         | ENSG00000060140 | 3424 | 0.414936 | 0.003127 | 0.034089 |
| SEC61B        | ENSG00000106803 | 1190 | 0.415543 | 2.81E-06 | 0.000664 |
| UQCRHL        | ENSG00000233954 | 2180 | 0.416733 | 5.05E-05 | 0.003505 |
| GLRX5         | ENSG00000182512 | 2845 | 0.417019 | 6.12E-05 | 0.003803 |
| TDO2          | ENSG00000151790 | 5264 | 0.417434 | 0.002356 | 0.028613 |
| HIST1H4C      | ENSG00000197061 | 435  | 0.41785  | 0.000383 | 0.009964 |
| ST6GALNAC4    | ENSG00000136840 | 2630 | 0.418741 | 0.003813 | 0.038429 |
| PBK           | ENSG00000168078 | 2165 | 0.418774 | 0.001009 | 0.017245 |
| APLP1         | ENSG00000105290 | 3656 | 0.41993  | 0.002552 | 0.029982 |
| RP11-351I24.3 | ENSG00000254719 | 208  | 0.420455 | 0.001452 | 0.021346 |
| BST2          | ENSG00000130303 | 1119 | 0.421324 | 0.005621 | 0.048585 |
| SNORA20       | ENSG00000207392 | 132  | 0.421474 | 0.004301 | 0.041395 |
| RP3-325F22.5  | ENSG00000272189 | 1894 | 0.421508 | 0.000294 | 0.008664 |
| ACTRT3        | ENSG00000184378 | 2005 | 0.422502 | 0.000254 | 0.008018 |
| UBL5          | ENSG00000198258 | 1931 | 0.42317  | 2.64E-07 | 0.000139 |
| RPS7P11       | ENSG00000213326 | 586  | 0.423683 | 1.26E-06 | 0.00042  |
| RPL39         | ENSG00000198918 | 2141 | 0.424413 | 1.63E-05 | 0.001807 |
| PPA1          | ENSG00000180817 | 5164 | 0.425096 | 2.48E-06 | 0.00061  |
| RP11-554E23.4 | ENSG00000257222 | 374  | 0.425692 | 4.92E-05 | 0.003429 |
| C1QB          | ENSG00000173369 | 1601 | 0.425937 | 0.003345 | 0.035524 |
| HAUS1P3       | ENSG00000253226 | 662  | 0.42679  | 0.004852 | 0.044398 |

|               |                 |      |          |          |          |
|---------------|-----------------|------|----------|----------|----------|
| TMEM97        | ENSG00000109084 | 3034 | 0.427052 | 3.97E-05 | 0.003008 |
| SS18L2        | ENSG00000008324 | 1301 | 0.427093 | 2.76E-06 | 0.000664 |
| ROMO1         | ENSG00000125995 | 702  | 0.427232 | 0.000395 | 0.010139 |
| UBE2T         | ENSG00000077152 | 1065 | 0.428398 | 0.000598 | 0.012867 |
| RPS20P21      | ENSG00000244295 | 343  | 0.429432 | 0.000146 | 0.005819 |
| SNORD3A       | ENSG00000263934 | 699  | 0.429555 | 0.00579  | 0.049489 |
| ACEA_U3       | ENSG00000277813 | 218  | 0.429563 | 0.00579  | 0.049489 |
| UQCRRQ        | ENSG00000164405 | 1472 | 0.431414 | 2.23E-05 | 0.002133 |
| RPL23A        | ENSG00000198242 | 2824 | 0.432167 | 1.72E-07 | 0.000117 |
| GCH1          | ENSG00000131979 | 2951 | 0.432989 | 0.000444 | 0.010822 |
| NPC2          | ENSG00000119655 | 2749 | 0.43383  | 2.7E-07  | 0.000139 |
| MARCH4        | ENSG00000144583 | 4447 | 0.433886 | 0.001782 | 0.024153 |
| SCARNA10      | ENSG00000239002 | 330  | 0.434225 | 9.6E-05  | 0.00485  |
| HIST1H4B      | ENSG00000278705 | 438  | 0.435084 | 0.001281 | 0.019765 |
| CKS2          | ENSG00000123975 | 613  | 0.437684 | 0.000107 | 0.005039 |
| CTD-2636A23.2 | ENSG00000261604 | 2497 | 0.438028 | 0.005094 | 0.045934 |
| RHOBTB1       | ENSG00000072422 | 4841 | 0.438327 | 0.005808 | 0.049545 |
| SNORA74       | ENSG00000223111 | 201  | 0.438827 | 0.004043 | 0.039884 |
| ENO1P1        | ENSG00000244457 | 1304 | 0.439017 | 0.000213 | 0.007271 |
| SC5D          | ENSG00000109929 | 5566 | 0.440888 | 0.003579 | 0.03713  |
| HMGCR         | ENSG00000113161 | 6215 | 0.440959 | 0.00025  | 0.007959 |
| GDF9          | ENSG00000164404 | 3279 | 0.443207 | 9.52E-05 | 0.004818 |
| RP11-11N7.4   | ENSG00000273175 | 535  | 0.443645 | 0.000971 | 0.016885 |
| RP11-338K17.8 | ENSG00000255839 | 321  | 0.443898 | 0.004238 | 0.041073 |
| HIST1H4A      | ENSG00000278637 | 312  | 0.443925 | 0.005795 | 0.0495   |
| SNORD28       | ENSG00000274544 | 75   | 0.446045 | 5.66E-05 | 0.0037   |
| SNORD4A       | ENSG00000264577 | 899  | 0.447143 | 1.87E-07 | 0.000119 |
| RPS3AP5       | ENSG00000178429 | 821  | 0.447359 | 0.001237 | 0.019426 |
| SNORD116-14   | ENSG00000206621 | 92   | 0.448636 | 0.004188 | 0.040762 |
| HIST1H3F      | ENSG00000277775 | 411  | 0.44937  | 0.004649 | 0.04327  |
| RUSC1-AS1     | ENSG00000225855 | 3516 | 0.449644 | 0.000642 | 0.013414 |
| CTC-209H22.3  | ENSG00000253172 | 496  | 0.4498   | 0.000826 | 0.015317 |
| HIST1H4H      | ENSG00000158406 | 397  | 0.449964 | 0.000213 | 0.007271 |
| GHRL          | ENSG00000157017 | 2064 | 0.450181 | 0.001335 | 0.020271 |
| FAM160B1      | ENSG00000151553 | 6216 | 0.450543 | 0.000279 | 0.008399 |
| SNORA80E      | ENSG00000207475 | 137  | 0.452444 | 0.004043 | 0.039884 |
| SCOC          | ENSG00000153130 | 6294 | 0.453388 | 2.27E-05 | 0.002158 |
| PSMB9         | ENSG00000240065 | 3072 | 0.453596 | 0.000306 | 0.008785 |
| CLEC10A       | ENSG00000132514 | 2469 | 0.455533 | 0.002742 | 0.031391 |
| PRDX4         | ENSG00000123131 | 1904 | 0.455762 | 3.97E-05 | 0.003008 |
| FDPS          | ENSG00000160752 | 3718 | 0.456082 | 0.000872 | 0.015849 |

|               |                 |      |          |          |          |
|---------------|-----------------|------|----------|----------|----------|
| GRHL1         | ENSG00000134317 | 7952 | 0.456615 | 0.004653 | 0.043287 |
| SNORA74B      | ENSG00000212402 | 201  | 0.457583 | 0.004562 | 0.042762 |
| ASGR1         | ENSG00000141505 | 3748 | 0.458783 | 0.00016  | 0.006121 |
| POFUT1        | ENSG00000101346 | 6426 | 0.459422 | 7.42E-06 | 0.001153 |
| LYPD6         | ENSG00000187123 | 5033 | 0.459532 | 0.001357 | 0.020422 |
| SNORA24       | ENSG00000206903 | 131  | 0.460107 | 0.00312  | 0.034055 |
| COX7A2        | ENSG00000112695 | 1922 | 0.460174 | 5.17E-06 | 0.000947 |
| SCARNA13      | ENSG00000252481 | 275  | 0.460798 | 3.51E-05 | 0.002905 |
| CD14          | ENSG00000170458 | 1886 | 0.461376 | 0.001451 | 0.021346 |
| RNVU1-14      | ENSG00000207501 | 164  | 0.461552 | 0.000337 | 0.009337 |
| ARRDC4        | ENSG00000140450 | 4072 | 0.463782 | 0.001738 | 0.023815 |
| NDUFB2-AS1    | ENSG00000240889 | 1648 | 0.464317 | 7.62E-05 | 0.004306 |
| EIF4EBP1      | ENSG00000187840 | 1073 | 0.464341 | 0.001378 | 0.020614 |
| RRM2          | ENSG00000171848 | 4955 | 0.464636 | 0.004104 | 0.040214 |
| SNORA84       | ENSG00000239183 | 133  | 0.464856 | 0.000672 | 0.013697 |
| RP11-196G11.1 | ENSG00000255439 | 2716 | 0.465666 | 0.004178 | 0.040694 |
| HIST1H2AH     | ENSG00000274997 | 387  | 0.46679  | 0.003526 | 0.036762 |
| TXNIP         | ENSG00000265972 | 3625 | 0.467536 | 8.61E-05 | 0.004578 |
| H3F3C         | ENSG00000188375 | 1057 | 0.467771 | 0.001205 | 0.019138 |
| SUCO          | ENSG00000094975 | 7894 | 0.46925  | 0.000352 | 0.009555 |
| SNORD100      | ENSG00000221500 | 76   | 0.470065 | 0.000231 | 0.007661 |
| DNAJC12       | ENSG00000108176 | 2121 | 0.470785 | 2.24E-05 | 0.002135 |
| FLJ22763      | ENSG00000241224 | 2406 | 0.471049 | 0.000159 | 0.006121 |
| MS4A4A        | ENSG00000110079 | 2508 | 0.471699 | 0.00064  | 0.013406 |
| GCHFR         | ENSG00000137880 | 1531 | 0.471805 | 0.004853 | 0.044398 |
| RP1-93H18.6   | ENSG00000244158 | 530  | 0.472614 | 0.003162 | 0.034337 |
| SNHG3         | ENSG00000242125 | 4088 | 0.47384  | 0.000156 | 0.006081 |
| MIR611        | ENSG00000207601 | 67   | 0.473878 | 3.4E-06  | 0.000753 |
| SNORD13       | ENSG00000239039 | 104  | 0.474297 | 0.004053 | 0.039938 |
| SNORD46       | ENSG00000200913 | 104  | 0.47623  | 0.002241 | 0.027711 |
| RP11-367G18.2 | ENSG00000218208 | 447  | 0.477163 | 6.3E-05  | 0.003815 |
| RPL7P1        | ENSG00000214485 | 747  | 0.477402 | 1.91E-05 | 0.001966 |
| GOLT1A        | ENSG00000174567 | 1136 | 0.477416 | 0.000136 | 0.005622 |
| SPAM1         | ENSG00000106304 | 3032 | 0.477456 | 0.00017  | 0.006394 |
| SNORA73A      | ENSG00000274266 | 206  | 0.477869 | 0.00016  | 0.006121 |
| LAPTM4B       | ENSG00000104341 | 3197 | 0.478065 | 0.000166 | 0.006272 |
| CTD-2571L23.6 | ENSG00000269656 | 540  | 0.478278 | 0.000397 | 0.010174 |
| TSPAN13       | ENSG00000106537 | 2224 | 0.479044 | 5.13E-05 | 0.003526 |
| CLCA1         | ENSG00000016490 | 3340 | 0.479684 | 9.05E-05 | 0.004722 |
| ACAT2         | ENSG00000120437 | 4299 | 0.482067 | 5.26E-05 | 0.003579 |
| SEC61G        | ENSG00000132432 | 1842 | 0.482831 | 9.6E-08  | 7.95E-05 |



|               |                 |      |          |          |          |
|---------------|-----------------|------|----------|----------|----------|
| STX1A         | ENSG00000106089 | 3693 | 0.483668 | 0.003101 | 0.033929 |
| SCARNA12      | ENSG00000238795 | 270  | 0.483985 | 7.9E-05  | 0.004407 |
| IL20RA        | ENSG00000016402 | 4730 | 0.48841  | 0.000335 | 0.009304 |
| ADORA3        | ENSG00000121933 | 4486 | 0.48918  | 0.00185  | 0.024726 |
| KB-1107E3.1   | ENSG00000253629 | 361  | 0.489242 | 0.004243 | 0.041087 |
| SNORA1        | ENSG00000206834 | 130  | 0.490387 | 7.61E-06 | 0.001163 |
| NME1          | ENSG00000239672 | 3438 | 0.490623 | 0.000543 | 0.012171 |
| DIRAS3        | ENSG00000162595 | 1973 | 0.490748 | 0.002559 | 0.030015 |
| CTD-2531D15.5 | ENSG00000255126 | 590  | 0.492077 | 0.005194 | 0.046564 |
| MIR3609       | ENSG00000266019 | 80   | 0.492952 | 5.55E-05 | 0.00368  |
| CCDC167       | ENSG00000198937 | 619  | 0.493118 | 8.13E-05 | 0.004448 |
| RN7SL5P       | ENSG00000265735 | 321  | 0.496137 | 0.001726 | 0.023704 |
| SCARNA5       | ENSG00000252010 | 276  | 0.497922 | 1.38E-05 | 0.001625 |
| NSDHL         | ENSG00000147383 | 1996 | 0.500372 | 3.92E-05 | 0.002999 |
| AC079250.1    | ENSG00000230979 | 531  | 0.501127 | 0.00017  | 0.006388 |
| HIST2H3D      | ENSG00000183598 | 411  | 0.5019   | 0.005264 | 0.046916 |
| AC147651.4    | ENSG00000237181 | 731  | 0.502347 | 0.003294 | 0.035126 |
| SLC35B1       | ENSG00000121073 | 5919 | 0.504213 | 1.07E-06 | 0.000381 |
| U12           | ENSG00000276027 | 150  | 0.504749 | 3.4E-05  | 0.002844 |
| HMGCS1        | ENSG00000112972 | 4702 | 0.508271 | 0.000398 | 0.010193 |
| ARL4A         | ENSG00000122644 | 3561 | 0.508396 | 7.05E-05 | 0.004117 |
| VKORC1        | ENSG00000167397 | 2191 | 0.509605 | 0.002581 | 0.030203 |
| FFAR4         | ENSG00000186188 | 4060 | 0.510518 | 0.003697 | 0.037762 |
| SNORA55       | ENSG00000201457 | 135  | 0.510545 | 0.001485 | 0.021643 |
| RNU12         | ENSG00000270022 | 664  | 0.510917 | 2.16E-05 | 0.002118 |
| CIDEC         | ENSG00000187288 | 1926 | 0.512037 | 0.000651 | 0.01352  |
| C6orf99       | ENSG00000203711 | 859  | 0.512203 | 0.000129 | 0.005521 |
| RNU5A-1       | ENSG00000199568 | 116  | 0.513386 | 0.001538 | 0.022097 |
| LDHB          | ENSG00000111716 | 2983 | 0.51542  | 8.15E-05 | 0.004448 |
| MCM6          | ENSG00000076003 | 4118 | 0.51631  | 0.000116 | 0.005253 |
| ST13P4        | ENSG00000232150 | 1093 | 0.516874 | 1.57E-06 | 0.000483 |
| ATP5EP2       | ENSG00000180389 | 385  | 0.518568 | 1.91E-06 | 0.000526 |
| ABHD6         | ENSG00000163686 | 3589 | 0.519256 | 0.001199 | 0.019091 |
| RPL24P2       | ENSG00000235065 | 475  | 0.519425 | 0.001608 | 0.022727 |
| TTR           | ENSG00000118271 | 2173 | 0.519815 | 0.001149 | 0.018671 |
| CTD-3014M21.1 | ENSG00000279602 | 1321 | 0.520386 | 0.002561 | 0.030027 |
| EIF4A1        | ENSG00000161960 | 5316 | 0.520582 | 0.000238 | 0.007788 |
| HSD17B14      | ENSG00000087076 | 1281 | 0.5215   | 0.004232 | 0.041038 |
| RPSA          | ENSG00000168028 | 3936 | 0.522735 | 1.58E-06 | 0.000483 |
| MIR19A        | ENSG00000277328 | 82   | 0.52422  | 0.000326 | 0.009157 |
| SNORA45B      | ENSG00000212607 | 131  | 0.524849 | 0.000136 | 0.005622 |

|               |                 |      |          |          |          |
|---------------|-----------------|------|----------|----------|----------|
| RN7SL2        | ENSG00000280102 | 374  | 0.525003 | 0.000194 | 0.006855 |
| RN7SL1        | ENSG00000258486 | 300  | 0.525029 | 0.002737 | 0.031391 |
| SNORA10       | ENSG00000206811 | 133  | 0.526427 | 0.004076 | 0.040054 |
| SCGN          | ENSG00000079689 | 1482 | 0.526764 | 2.63E-07 | 0.000139 |
| SCG5          | ENSG00000166922 | 2196 | 0.5277   | 0.002741 | 0.031391 |
| FABP2         | ENSG00000145384 | 2478 | 0.527706 | 0.001512 | 0.021859 |
| SUCLA2P1      | ENSG00000224936 | 1370 | 0.529218 | 7.26E-06 | 0.001141 |
| RNaseP_nuc    | ENSG00000277209 | 333  | 0.531022 | 2.45E-05 | 0.00228  |
| RPPH1         | ENSG00000259001 | 638  | 0.531025 | 2.45E-05 | 0.00228  |
| H2AFZ         | ENSG00000164032 | 2303 | 0.531678 | 8.35E-08 | 7.64E-05 |
| SNORA8        | ENSG00000207304 | 139  | 0.531879 | 0.005053 | 0.045667 |
| SNORA70       | ENSG00000207165 | 135  | 0.532168 | 0.000217 | 0.007367 |
| UBE2Q2P6      | ENSG00000237550 | 717  | 0.53237  | 0.002262 | 0.027841 |
| RP1-99E18.2   | ENSG00000218996 | 599  | 0.533735 | 3.62E-05 | 0.002905 |
| REG1A         | ENSG00000115386 | 1725 | 0.53438  | 0.001017 | 0.017296 |
| SCARNA6       | ENSG00000251791 | 265  | 0.534393 | 6.21E-05 | 0.003815 |
| SNORA74A      | ENSG00000200959 | 198  | 0.53574  | 9.01E-05 | 0.004712 |
| RP11-963H4.3  | ENSG00000263508 | 774  | 0.536553 | 0.000232 | 0.007661 |
| RMDN3         | ENSG00000137824 | 5114 | 0.53719  | 6.98E-06 | 0.001124 |
| SEC22C        | ENSG00000093183 | 8159 | 0.539351 | 0.000136 | 0.005622 |
| MIR4709       | ENSG00000265649 | 72   | 0.539409 | 5.24E-08 | 5.52E-05 |
| SNORA44       | ENSG00000273544 | 132  | 0.542175 | 0.001292 | 0.019886 |
| SLC16A14      | ENSG00000163053 | 4946 | 0.544727 | 0.00237  | 0.0287   |
| SNORD22       | ENSG00000277194 | 126  | 0.545308 | 0.001313 | 0.020094 |
| FBXO8         | ENSG00000164117 | 2810 | 0.545772 | 8.69E-07 | 0.000323 |
| SVOP          | ENSG00000166111 | 7270 | 0.54589  | 0.000106 | 0.005029 |
| RP11-671J11.5 | ENSG00000279423 | 671  | 0.546337 | 0.00252  | 0.029831 |
| U1            | ENSG00000206828 | 164  | 0.546658 | 0.001033 | 0.017454 |
| SNORA38B      | ENSG00000200394 | 131  | 0.546788 | 0.00154  | 0.022097 |
| SNHG15        | ENSG00000232956 | 3647 | 0.547499 | 0.000149 | 0.005876 |
| DHCR7         | ENSG00000172893 | 4160 | 0.550605 | 0.003004 | 0.033226 |
| GGH           | ENSG00000137563 | 3130 | 0.552977 | 0.000147 | 0.005854 |
| SNHG8         | ENSG00000269893 | 923  | 0.553561 | 4.25E-07 | 0.000198 |
| SNORA26       | ENSG00000212588 | 122  | 0.555685 | 0.003581 | 0.03713  |
| IDI1          | ENSG00000067064 | 3589 | 0.556941 | 0.002816 | 0.032012 |
| RNY1          | ENSG00000201098 | 113  | 0.558624 | 8.96E-05 | 0.004712 |
| SNORA64       | ENSG00000207187 | 133  | 0.560998 | 0.003825 | 0.038482 |
| RP11-15B17.1  | ENSG00000245322 | 1714 | 0.561294 | 3.51E-08 | 3.99E-05 |
| SNORA21       | ENSG00000199293 | 132  | 0.562292 | 0.001514 | 0.021862 |
| SNORA76A      | ENSG00000206952 | 134  | 0.563268 | 0.001549 | 0.022148 |
| RGS4          | ENSG00000117152 | 4836 | 0.565029 | 0.000193 | 0.006848 |

|               |                 |       |          |          |          |
|---------------|-----------------|-------|----------|----------|----------|
| RPL18A        | ENSG00000105640 | 3527  | 0.566233 | 1.89E-05 | 0.001956 |
| APOH          | ENSG00000091583 | 1332  | 0.569069 | 0.004462 | 0.042328 |
| RP11-215A21.2 | ENSG00000236058 | 549   | 0.576885 | 0.000141 | 0.005753 |
| RP1-292B18.1  | ENSG00000219747 | 405   | 0.579095 | 0.000551 | 0.012245 |
| SCARNA23      | ENSG00000251869 | 130   | 0.584415 | 0.000109 | 0.005083 |
| HIST1H4D      | ENSG00000277157 | 312   | 0.587839 | 4.54E-05 | 0.003264 |
| FABP4         | ENSG00000170323 | 1396  | 0.590702 | 0.005714 | 0.0491   |
| RP11-36C20.1  | ENSG00000240376 | 629   | 0.590729 | 3.44E-06 | 0.000753 |
| RPS29         | ENSG00000213741 | 9783  | 0.59543  | 5.49E-07 | 0.000231 |
| RNU4ATAC      | ENSG00000264229 | 127   | 0.597782 | 1.39E-05 | 0.001625 |
| RAB30         | ENSG00000137502 | 11832 | 0.597949 | 0.00223  | 0.027667 |
| SNORA23       | ENSG00000201998 | 182   | 0.602321 | 1.5E-05  | 0.001714 |
| SNHG12        | ENSG00000197989 | 3377  | 0.604214 | 0.000246 | 0.007896 |
| MSMO1         | ENSG00000052802 | 2892  | 0.605869 | 0.001861 | 0.024805 |
| SNORA48       | ENSG00000209582 | 135   | 0.607335 | 0.000204 | 0.007154 |
| CCK           | ENSG00000187094 | 2085  | 0.607922 | 2.69E-05 | 0.002475 |
| TCP1P1        | ENSG00000229161 | 1610  | 0.608338 | 0.005503 | 0.047997 |
| SNORA25       | ENSG00000207112 | 134   | 0.60895  | 1.73E-06 | 0.000494 |
| RBP4          | ENSG00000138207 | 1449  | 0.610162 | 0.00426  | 0.041211 |
| SNORD105B     | ENSG00000238531 | 79    | 0.611803 | 0.00044  | 0.01077  |
| CCR2          | ENSG00000121807 | 3733  | 0.615006 | 0.000643 | 0.01342  |
| C11orf86      | ENSG00000173237 | 1187  | 0.617873 | 0.001947 | 0.025428 |
| MMD           | ENSG00000108960 | 3177  | 0.619234 | 0.00026  | 0.008123 |
| RP11-216N14.7 | ENSG00000223599 | 1309  | 0.63175  | 9.82E-05 | 0.004908 |
| RNU1-122P     | ENSG00000202408 | 156   | 0.634254 | 0.005247 | 0.046854 |
| RP11-288G3.4  | ENSG00000234115 | 1241  | 0.641052 | 0.000738 | 0.014385 |
| TFF3          | ENSG00000160180 | 1168  | 0.645573 | 7.04E-07 | 0.000279 |
| GZMH          | ENSG00000100450 | 951   | 0.649135 | 0.002035 | 0.026326 |
| HPS5          | ENSG00000110756 | 6433  | 0.649662 | 1.11E-05 | 0.00143  |
| SNORA16A      | ENSG00000274582 | 137   | 0.650491 | 0.005679 | 0.048919 |
| HIST2H3DP1    | ENSG00000213244 | 416   | 0.653476 | 0.000744 | 0.01445  |
| RIMBP3C       | ENSG00000183246 | 6105  | 0.655261 | 0.00042  | 0.010464 |
| RNVU1-6       | ENSG00000201558 | 164   | 0.657187 | 0.000506 | 0.011758 |
| SNORA75       | ENSG00000206885 | 137   | 0.658265 | 0.000338 | 0.009337 |
| MIR4426       | ENSG00000231767 | 466   | 0.666055 | 5.44E-05 | 0.003661 |
| SNORA33       | ENSG00000200534 | 130   | 0.671416 | 6.22E-08 | 6.08E-05 |
| RP11-535A19.1 | ENSG00000254814 | 758   | 0.671574 | 0.004124 | 0.040342 |
| ABHD5         | ENSG00000011198 | 3172  | 0.673221 | 2.07E-05 | 0.002082 |
| SNORA77       | ENSG00000221643 | 125   | 0.679472 | 0.004273 | 0.041239 |
| RPS20P35      | ENSG00000244086 | 357   | 0.683493 | 0.002628 | 0.030573 |
| ASNS          | ENSG00000070669 | 4455  | 0.688607 | 0.001554 | 0.022162 |

|               |                 |       |          |          |          |
|---------------|-----------------|-------|----------|----------|----------|
| LIPG          | ENSG00000101670 | 13112 | 0.688702 | 0.000177 | 0.006546 |
| GZMB          | ENSG00000100453 | 1411  | 0.692338 | 0.0022   | 0.027516 |
| METTL12       | ENSG00000214756 | 3185  | 0.694206 | 4.96E-05 | 0.003447 |
| SCARNA3       | ENSG00000252906 | 143   | 0.694757 | 1.81E-05 | 0.001926 |
| RN7SL674P     | ENSG00000239899 | 275   | 0.695824 | 0.000675 | 0.013717 |
| LRG1          | ENSG00000171236 | 3133  | 0.696794 | 0.000845 | 0.0155   |
| KDM8          | ENSG00000155666 | 4039  | 0.697179 | 5.84E-05 | 0.003767 |
| SHBG          | ENSG00000129214 | 1972  | 0.69881  | 0.000815 | 0.015231 |
| DGAT2         | ENSG00000062282 | 7905  | 0.70647  | 0.002086 | 0.026693 |
| IGHV3-11      | ENSG00000211941 | 473   | 0.707914 | 0.002275 | 0.02792  |
| CXCL2         | ENSG00000081041 | 1500  | 0.708454 | 0.002523 | 0.029834 |
| CHRD2         | ENSG00000054938 | 3135  | 0.70869  | 0.003706 | 0.037778 |
| SNORA57       | ENSG00000206597 | 149   | 0.711271 | 5.18E-05 | 0.003541 |
| RNU2-63P      | ENSG00000222724 | 194   | 0.711628 | 0.003269 | 0.034935 |
| RPL9P7        | ENSG00000238103 | 580   | 0.716395 | 0.004676 | 0.043455 |
| CTD-3203P2.1  | ENSG00000259940 | 1686  | 0.720191 | 3.56E-05 | 0.002905 |
| ACSL1         | ENSG00000151726 | 6284  | 0.721577 | 0.000221 | 0.007424 |
| SNHG9         | ENSG00000255198 | 551   | 0.722228 | 0.000478 | 0.011314 |
| KRT222        | ENSG00000213424 | 3169  | 0.724544 | 0.001497 | 0.021728 |
| KLK12         | ENSG00000186474 | 1769  | 0.725047 | 0.003759 | 0.038135 |
| AC002480.5    | ENSG00000225541 | 1282  | 0.735062 | 0.003841 | 0.038553 |
| RENBP         | ENSG00000102032 | 2057  | 0.735661 | 0.002973 | 0.032964 |
| SCARNA18      | ENSG00000238835 | 134   | 0.740064 | 9.92E-06 | 0.001356 |
| CTD-2028E8.2  | ENSG00000279701 | 967   | 0.744134 | 0.000728 | 0.014283 |
| SNORA54       | ENSG00000207008 | 123   | 0.749566 | 0.000417 | 0.010418 |
| SLC25A5P6     | ENSG00000213332 | 886   | 0.750055 | 0.000305 | 0.008785 |
| SNORA9        | ENSG00000277184 | 133   | 0.755418 | 0.000745 | 0.01445  |
| SNORA7A       | ENSG00000207496 | 139   | 0.75623  | 0.000628 | 0.013214 |
| SCARNA4       | ENSG00000252808 | 129   | 0.769269 | 3.02E-05 | 0.002645 |
| SNORA71D      | ENSG00000200354 | 134   | 0.775874 | 0.002969 | 0.032931 |
| SNORA76C      | ENSG00000266402 | 278   | 0.776983 | 0.001508 | 0.021833 |
| SNORA6        | ENSG00000206760 | 151   | 0.78131  | 6.48E-07 | 0.000261 |
| AC002480.4    | ENSG00000232949 | 557   | 0.783338 | 0.003293 | 0.035126 |
| SNORA68       | ENSG00000207166 | 133   | 0.784972 | 0.000188 | 0.006761 |
| LINC00888     | ENSG00000240024 | 2131  | 0.786561 | 2.79E-06 | 0.000664 |
| RP11-357D18.1 | ENSG00000250978 | 837   | 0.793386 | 0.002128 | 0.026998 |
| SNORA79       | ENSG00000221303 | 140   | 0.804865 | 3.52E-05 | 0.002905 |
| SNORA31       | ENSG00000199477 | 130   | 0.815465 | 2.94E-09 | 5.03E-06 |
| SNORA78       | ENSG00000273587 | 127   | 0.816962 | 0.002406 | 0.028928 |
| AJUBA         | ENSG00000129474 | 5979  | 0.819161 | 6.92E-05 | 0.004092 |
| RN7SL4P       | ENSG00000263740 | 295   | 0.831754 | 7.36E-07 | 0.000287 |

|               |                 |       |          |          |          |
|---------------|-----------------|-------|----------|----------|----------|
| AC005077.7    | ENSG00000224273 | 631   | 0.832459 | 0.002672 | 0.030956 |
| G0S2          | ENSG00000123689 | 866   | 0.832919 | 0.000823 | 0.015262 |
| G6PC2         | ENSG00000152254 | 3125  | 0.836332 | 0.003774 | 0.038204 |
| TMEM107       | ENSG00000179029 | 3163  | 0.849829 | 2.19E-06 | 0.000553 |
| RNU6ATAC      | ENSG00000221676 | 126   | 0.85025  | 0.000187 | 0.006739 |
| RP3-340B19.2  | ENSG00000219023 | 392   | 0.853899 | 4.7E-09  | 7.13E-06 |
| SNORA14A      | ENSG00000201643 | 135   | 0.856351 | 3.18E-05 | 0.002755 |
| AC139452.2    | ENSG00000227337 | 471   | 0.862467 | 7.42E-05 | 0.004237 |
| SNORA45A      | ENSG00000200983 | 130   | 0.864164 | 0.001707 | 0.023559 |
| RNU5F-1       | ENSG00000199377 | 117   | 0.866461 | 0.000662 | 0.01364  |
| RNVU1-19      | ENSG00000275538 | 167   | 0.873971 | 0.000538 | 0.012135 |
| CTC-518B2.9   | ENSG00000268906 | 485   | 0.87434  | 0.000301 | 0.008715 |
| SNORA14B      | ENSG00000207181 | 135   | 0.875228 | 1.35E-06 | 0.000443 |
| SNORA2A       | ENSG00000206612 | 135   | 0.877303 | 0.001615 | 0.022774 |
| RNU1-120P     | ENSG00000199879 | 157   | 0.889292 | 0.000937 | 0.016547 |
| RP11-293M10.2 | ENSG00000258820 | 874   | 0.898994 | 0.003408 | 0.036005 |
| LPL           | ENSG00000175445 | 4382  | 0.914276 | 0.005655 | 0.048805 |
| SNORD118      | ENSG00000200463 | 134   | 0.923872 | 3.89E-06 | 0.000804 |
| RP11-356M20.1 | ENSG00000259674 | 802   | 0.935465 | 0.003659 | 0.037563 |
| PSAT1         | ENSG00000135069 | 2188  | 0.965304 | 0.000818 | 0.015231 |
| RP11-96A15.1  | ENSG00000278464 | 670   | 0.968346 | 0.005437 | 0.047734 |
| SNORA17       | ENSG00000274998 | 133   | 0.976415 | 0.001807 | 0.024341 |
| PAPPA2        | ENSG00000116183 | 10930 | 0.977559 | 5.42E-06 | 0.000971 |
| NTS           | ENSG00000133636 | 1555  | 1.010749 | 0.00085  | 0.015538 |
| SNORA62       | ENSG00000202363 | 153   | 1.015419 | 6.86E-06 | 0.001124 |
| SNORD15A      | ENSG00000206941 | 148   | 1.020583 | 8.41E-06 | 0.001248 |
| DUOX2         | ENSG00000140279 | 9834  | 1.02766  | 0.000958 | 0.016763 |
| SCARNA14      | ENSG00000252712 | 136   | 1.120089 | 1.92E-06 | 0.000526 |
| PLIN2         | ENSG00000147872 | 5086  | 1.123463 | 2.26E-06 | 0.000566 |
| SNORA63       | ENSG00000199363 | 131   | 1.149263 | 0.000104 | 0.005013 |
| MFSD2A        | ENSG00000168389 | 4007  | 1.156549 | 1.28E-05 | 0.001566 |
| SNORA61       | ENSG00000278274 | 130   | 1.216831 | 8.99E-06 | 0.001298 |
| IGHV2-70      | ENSG00000211974 | 434   | 1.238835 | 0.000681 | 0.013776 |
| INHBE         | ENSG00000139269 | 3015  | 1.254452 | 0.000713 | 0.014094 |
| RP11-587D21.1 | ENSG00000240036 | 376   | 1.256618 | 0.00043  | 0.010606 |
| LCN2          | ENSG00000148346 | 1598  | 1.276131 | 0.000157 | 0.006082 |
| CHAC1         | ENSG00000128965 | 2058  | 1.283768 | 0.000156 | 0.006076 |
| PNLIPRP1      | ENSG00000187021 | 4986  | 1.335258 | 0.000541 | 0.012167 |
| CPXM2         | ENSG00000121898 | 4859  | 1.366175 | 0.001191 | 0.019039 |
| CELA2B        | ENSG00000215704 | 1457  | 1.410338 | 0.001233 | 0.019408 |
| TRBV6-1       | ENSG00000211706 | 401   | 1.443923 | 0.001078 | 0.018056 |

|              |                 |      |          |          |          |
|--------------|-----------------|------|----------|----------|----------|
| DUOXA2       | ENSG00000140274 | 2554 | 1.501411 | 0.004332 | 0.041534 |
| TREML2       | ENSG00000112195 | 3302 | 1.526715 | 0.000435 | 0.010655 |
| RN7SL3       | ENSG00000279868 | 297  | 1.526718 | 1.26E-05 | 0.00155  |
| NLRP2        | ENSG00000022556 | 6313 | 1.573741 | 1.12E-05 | 0.00143  |
| RNU1-1       | ENSG00000206652 | 164  | 1.599571 | 0.003539 | 0.036851 |
| RN7SL272P    | ENSG00000242360 | 289  | 1.60585  | 0.002551 | 0.029982 |
| CEL          | ENSG00000170835 | 2681 | 1.605983 | 0.000147 | 0.005857 |
| SNORD3B-2    | ENSG00000262074 | 688  | 1.636701 | 5.31E-05 | 0.00359  |
| PLA2G1B      | ENSG00000170890 | 638  | 1.764413 | 0.000931 | 0.016514 |
| TRIB3        | ENSG00000101255 | 3434 | 1.824858 | 5.59E-05 | 0.00368  |
| UBD          | ENSG00000213886 | 1087 | 1.911491 | 0.000388 | 0.010037 |
| CELA3B       | ENSG00000219073 | 1541 | 1.975439 | 0.000221 | 0.007424 |
| SNORD3B-1    | ENSG00000265185 | 583  | 2.019492 | 5.59E-06 | 0.000986 |
| PRSS1        | ENSG00000204983 | 2081 | 2.166156 | 0.000136 | 0.005622 |
| AC091154.1   | ENSG00000276078 | 89   | 2.464243 | 0.000137 | 0.005622 |
| RP11-689K5.3 | ENSG00000251331 | 699  | 2.481136 | 4.78E-06 | 0.000901 |
| SNORD3C      | ENSG00000264940 | 581  | 3.528362 | 1.32E-08 | 1.71E-05 |
| CTRC         | ENSG00000162438 | 3486 | 3.5289   | 3.05E-05 | 0.002664 |
| CPB1         | ENSG00000153002 | 5703 | 3.622689 | 2.79E-05 | 0.002526 |
| CELA3A       | ENSG00000142789 | 1224 | 4.215595 | 1.17E-06 | 0.0004   |
| CTRB2        | ENSG00000168928 | 2346 | 4.977091 | 0.000312 | 0.008868 |
| U8           | ENSG00000206987 | 133  | 5.028652 | 0.005498 | 0.047993 |
| CELA2A       | ENSG00000142615 | 1519 | 5.030251 | 7.73E-06 | 0.001169 |
| CTRB1        | ENSG00000168925 | 1016 | 5.185435 | 3.54E-05 | 0.002905 |
| CLPS         | ENSG00000137392 | 601  | 6.432123 | 0.000596 | 0.012854 |
| CPA1         | ENSG00000091704 | 2921 | 6.526719 | 3.19E-06 | 0.000721 |

Abbreviations: FC, Fold change; FDR, false discovery rate

**Supplementary Table 2. List of genes differentially expressed in DM that were also common to MitoCarta 2.0**

| <b>Symbol</b> | <b>log2FC</b> | <b>Fold change</b> | <b>PValue</b> | <b>FDR</b>  |
|---------------|---------------|--------------------|---------------|-------------|
| NDUFAF5       | 0.146024248   | 1.10651595         | 0.001586599   | 0.022487924 |
| PDHA1         | 0.154233049   | 1.112829869        | 0.005767201   | 0.049321566 |
| YARS2         | 0.155089554   | 1.113490735        | 0.004240152   | 0.041080793 |
| DARS2         | 0.160672892   | 1.117808377        | 0.002896167   | 0.032425924 |
| SDHC          | 0.160758398   | 1.117874629        | 0.002740253   | 0.031391004 |
| DIABLO        | 0.165224858   | 1.121340836        | 0.005645685   | 0.048755105 |
| YME1L1        | 0.166396827   | 1.122252124        | 0.004588117   | 0.042883086 |
| SCO1          | 0.166450774   | 1.12229409         | 0.003221505   | 0.034690501 |
| PARL          | 0.169786387   | 1.124891915        | 0.002090781   | 0.026712174 |
| FUNDC2        | 0.171209541   | 1.126002118        | 0.001498524   | 0.021727703 |
| DAP3          | 0.171288373   | 1.126063647        | 0.00226234    | 0.027840925 |
| MLH1          | 0.171313565   | 1.12608331         | 0.001198746   | 0.019091342 |
| GDAP1         | 0.172431287   | 1.126956076        | 0.002885975   | 0.032373712 |
| TIMM10B       | 0.172718734   | 1.127180637        | 0.002784446   | 0.031720638 |
| CMC2          | 0.173343057   | 1.127668527        | 0.000525378   | 0.011980286 |
| MPV17         | 0.174976394   | 1.128945933        | 0.004518963   | 0.042543806 |
| SDHAF2        | 0.176753347   | 1.130337301        | 0.000576641   | 0.012663411 |
| SLC25A17      | 0.179130106   | 1.132201003        | 0.001165231   | 0.018835704 |
| ATP10D        | 0.180915952   | 1.13360337         | 0.001488177   | 0.02165421  |
| MALSU1        | 0.181200342   | 1.133826853        | 0.000878384   | 0.015873034 |
| KARS          | 0.181243078   | 1.13386044         | 0.001784943   | 0.024171441 |
| MTO1          | 0.18151697    | 1.13407572         | 0.00585046    | 0.049804088 |
| PPA2          | 0.182278783   | 1.134674726        | 0.003773379   | 0.038203547 |
| PTRH2         | 0.183753131   | 1.135834888        | 0.000166576   | 0.006284792 |
| MRPS18C       | 0.184028067   | 1.136051366        | 0.004506643   | 0.042502979 |
| NIPSNAP3A     | 0.184773247   | 1.13663831         | 0.003824486   | 0.03848151  |
| MRPS22        | 0.187955824   | 1.139148495        | 0.002781898   | 0.031704827 |
| PDHX          | 0.188281644   | 1.139405791        | 0.00451399    | 0.042517752 |
| NGRN          | 0.189606223   | 1.140452392        | 0.00127338    | 0.019703154 |
| HSDL1         | 0.191243121   | 1.141747096        | 0.005322716   | 0.0472035   |
| SAMM50        | 0.191325589   | 1.141812364        | 0.002222827   | 0.027666901 |
| MRPS14        | 0.19461654    | 1.14441994         | 0.000566398   | 0.01250879  |
| COQ5          | 0.195057087   | 1.144769458        | 0.004296481   | 0.04137728  |
| TFAM          | 0.195915105   | 1.145450492        | 0.000935984   | 0.01654696  |
| MRPL48        | 0.197619225   | 1.146804305        | 0.003185261   | 0.034435831 |
| TEFM          | 0.197723816   | 1.146887447        | 0.000270566   | 0.008274659 |
| FTSJ2         | 0.198219946   | 1.14728192         | 0.000566952   | 0.012510919 |
| NDUFV2        | 0.199284086   | 1.148128474        | 0.003450513   | 0.036256906 |

|         |             |             |             |             |
|---------|-------------|-------------|-------------|-------------|
| MRPS17  | 0.20093314  | 1.149441577 | 0.00488336  | 0.0445945   |
| RNMTL1  | 0.201374553 | 1.149793319 | 0.005860328 | 0.049868422 |
| DLD     | 0.201376788 | 1.1497951   | 0.001137214 | 0.018551655 |
| NFU1    | 0.201401865 | 1.149815086 | 0.005145048 | 0.046227653 |
| COX4I1  | 0.203777704 | 1.151710169 | 0.004189396 | 0.040762378 |
| MIPEP   | 0.204803002 | 1.152528959 | 0.000693934 | 0.013899522 |
| CYB5B   | 0.207038312 | 1.154316071 | 0.001845455 | 0.024697306 |
| METTL5  | 0.207477403 | 1.154667446 | 0.003585365 | 0.037129614 |
| TXNDC12 | 0.207795406 | 1.154921989 | 0.000309208 | 0.008833926 |
| LYRM2   | 0.208031884 | 1.155111313 | 0.000710149 | 0.014079904 |
| TIMM21  | 0.209566866 | 1.156340969 | 0.003324427 | 0.035339482 |
| COA7    | 0.213044402 | 1.159131626 | 0.004495496 | 0.042497101 |
| TIMMDC1 | 0.213328695 | 1.159360063 | 6.26363E-05 | 0.003814758 |
| FASTKD1 | 0.215111864 | 1.160793917 | 0.000157884 | 0.006105684 |
| MRPS21  | 0.215153691 | 1.160827571 | 0.000613032 | 0.013033361 |
| MRPL57  | 0.216527531 | 1.161933523 | 0.000919181 | 0.016372206 |
| TIMM23  | 0.216928965 | 1.162256879 | 0.002233182 | 0.027676648 |
| MRPL33  | 0.217065049 | 1.162366516 | 0.00191548  | 0.025190549 |
| MTX2    | 0.217101929 | 1.16239623  | 1.84876E-05 | 0.001936668 |
| NUDT5   | 0.217222971 | 1.162493759 | 1.54295E-05 | 0.001750447 |
| GOT2    | 0.217445011 | 1.162672688 | 0.000578348 | 0.012680518 |
| SSBP1   | 0.217859181 | 1.163006517 | 0.000684741 | 0.013816612 |
| MRPL35  | 0.218113292 | 1.163211382 | 0.000930157 | 0.016503197 |
| HCCS    | 0.218397563 | 1.163440606 | 0.001049728 | 0.01769686  |
| GRPEL2  | 0.220347018 | 1.165013778 | 0.003071603 | 0.033706266 |
| COQ2    | 0.220442598 | 1.165090965 | 0.001491536 | 0.021691531 |
| OMA1    | 0.22097676  | 1.165522423 | 0.005351442 | 0.047350735 |
| ISCA2   | 0.222193419 | 1.16650575  | 0.000107259 | 0.005038797 |
| ATP5F1  | 0.222581228 | 1.166819359 | 0.0040978   | 0.040200196 |
| CISD1   | 0.222900475 | 1.167077588 | 0.00531344  | 0.047151818 |
| PTPMT1  | 0.22290409  | 1.167080512 | 0.00048397  | 0.011407084 |
| FASTKD2 | 0.223540308 | 1.1675953   | 0.000272727 | 0.008331434 |
| TMEM205 | 0.223805619 | 1.167810039 | 0.004608652 | 0.042990501 |
| DHRS7B  | 0.223821783 | 1.167823124 | 0.003295369 | 0.035126241 |
| MRPS23  | 0.223886806 | 1.167875759 | 0.001102261 | 0.01828147  |
| SMDT1   | 0.22644021  | 1.169944595 | 0.001917254 | 0.025201746 |
| MRPS16  | 0.226632506 | 1.170100547 | 0.000463612 | 0.011105115 |
| PRELID2 | 0.227035472 | 1.170427419 | 0.002293813 | 0.028085597 |
| ATP5A1  | 0.22946036  | 1.172396333 | 0.003726331 | 0.037892223 |
| TOMM6   | 0.229815969 | 1.172685352 | 0.000292248 | 0.008641564 |
| UQCRRS1 | 0.230628233 | 1.173345781 | 0.002246045 | 0.027751266 |



|              |             |             |             |             |
|--------------|-------------|-------------|-------------|-------------|
| THNSL1       | 0.231845203 | 1.174335961 | 0.002874194 | 0.032351364 |
| CHCHD3       | 0.233207001 | 1.175444971 | 0.001645806 | 0.023016876 |
| OXSM         | 0.233462944 | 1.175653521 | 0.000230262 | 0.007646623 |
| GFM1         | 0.234749748 | 1.176702607 | 0.000118511 | 0.00531184  |
| MPC2         | 0.235772144 | 1.177536798 | 0.000667192 | 0.013662094 |
| HSPA9        | 0.23995777  | 1.180958092 | 0.002086382 | 0.026693391 |
| TPI1         | 0.240579325 | 1.181466993 | 0.002377274 | 0.028732582 |
| ATP5C1       | 0.241421049 | 1.182156508 | 0.00087019  | 0.015829588 |
| ATP5J2-PTCD1 | 0.242009721 | 1.182638969 | 0.002489142 | 0.029576546 |
| VDAC3        | 0.242551676 | 1.183083316 | 0.000242592 | 0.007858649 |
| SLC25A3      | 0.242856344 | 1.183333186 | 0.001259503 | 0.019566816 |
| PDHB         | 0.242868759 | 1.183343369 | 0.000177174 | 0.006546084 |
| MARS2        | 0.243136365 | 1.183562888 | 0.002381333 | 0.028732582 |
| ATP5I        | 0.2436636   | 1.183995501 | 0.003486616 | 0.036523973 |
| NDUFB11      | 0.243800121 | 1.184107547 | 0.002537556 | 0.029879118 |
| NDUFS3       | 0.244055668 | 1.184317309 | 0.00206581  | 0.026557875 |
| MRPL18       | 0.245948587 | 1.185872238 | 0.001363079 | 0.020454417 |
| ATP5B        | 0.245980593 | 1.185898547 | 0.001606023 | 0.022723509 |
| MRPL22       | 0.246548817 | 1.18636572  | 9.20315E-05 | 0.004763662 |
| HSPD1        | 0.248303466 | 1.187809492 | 0.00068968  | 0.013871915 |
| GFM2         | 0.249545386 | 1.188832438 | 1.11845E-06 | 0.000392044 |
| NDUFB5       | 0.249672107 | 1.188936865 | 0.001249365 | 0.019530524 |
| NDUFB8       | 0.250260249 | 1.189421656 | 0.001816958 | 0.024449225 |
| GRPEL1       | 0.25069684  | 1.189781656 | 0.000809866 | 0.015194917 |
| NDUFB4       | 0.251758394 | 1.190657435 | 0.001831721 | 0.02457364  |
| RARS         | 0.252412813 | 1.191197651 | 0.000735051 | 0.014355013 |
| PRDX3        | 0.252434186 | 1.191215297 | 0.00025703  | 0.008059015 |
| MRPL39       | 0.254062798 | 1.192560781 | 0.000553252 | 0.012276486 |
| MRPL27       | 0.25449519  | 1.192918259 | 0.000190957 | 0.00680228  |
| ATP5G2       | 0.256179993 | 1.194312182 | 0.001426519 | 0.021162488 |
| TMEM14C      | 0.256299275 | 1.194410932 | 0.000145256 | 0.005806186 |
| MRPL20       | 0.256391142 | 1.194486991 | 0.000212915 | 0.007271412 |
| IDH1         | 0.257079901 | 1.195057389 | 0.001454128 | 0.021349275 |
| GHITM        | 0.257193049 | 1.195151119 | 0.002589348 | 0.030267369 |
| FH           | 0.257710565 | 1.195579915 | 0.00034973  | 0.009516104 |
| NDUFA7       | 0.258640308 | 1.196350653 | 0.005004816 | 0.045355216 |
| MRPL3        | 0.258642142 | 1.196352173 | 0.000384977 | 0.010014887 |
| MRPL47       | 0.258767356 | 1.196456012 | 0.002532184 | 0.029855204 |
| TOMM22       | 0.258962039 | 1.196617477 | 0.000424821 | 0.010539968 |
| COX16        | 0.259114697 | 1.196744103 | 0.000549125 | 0.012232454 |

|          |             |             |             |             |
|----------|-------------|-------------|-------------|-------------|
| NDUFS4   | 0.259741227 | 1.197263935 | 0.000411858 | 0.01035564  |
| C2orf47  | 0.260513225 | 1.197904772 | 0.000584228 | 0.012727786 |
| MRPL50   | 0.261531864 | 1.198750872 | 0.000804722 | 0.015152831 |
| MRPL36   | 0.262316925 | 1.199403364 | 0.002733475 | 0.031391004 |
| CCT7     | 0.262323902 | 1.199409165 | 4.8252E-05  | 0.003408934 |
| TRIAP1   | 0.262535113 | 1.199584771 | 1.84865E-05 | 0.001936668 |
| FLAD1    | 0.262870457 | 1.199863639 | 0.000608131 | 0.012979642 |
| PACSIN2  | 0.263165468 | 1.200109019 | 0.004546957 | 0.042706406 |
| CHCHD4   | 0.263462778 | 1.200356363 | 0.000255649 | 0.008024925 |
| PHB      | 0.264032177 | 1.200830209 | 0.001084741 | 0.018105209 |
| MRPS33   | 0.267379576 | 1.203619659 | 0.000833429 | 0.015344632 |
| FAM162A  | 0.267976526 | 1.204117789 | 0.000279248 | 0.00839925  |
| KIAA0391 | 0.268252094 | 1.204347809 | 0.000108949 | 0.005082511 |
| NDUFC1   | 0.268606874 | 1.204644011 | 0.000275826 | 0.008351451 |
| MRPL11   | 0.268719615 | 1.204738154 | 0.00058322  | 0.012726107 |
| CHCHD2   | 0.269921723 | 1.205742405 | 0.001235337 | 0.019421385 |
| SLC25A11 | 0.270550189 | 1.206267764 | 0.000975139 | 0.016906317 |
| APOO     | 0.270798958 | 1.206475784 | 0.001340897 | 0.020311068 |
| NDUFA2   | 0.271501594 | 1.207063517 | 0.002127127 | 0.026998067 |
| COA3     | 0.271808979 | 1.207320725 | 2.98349E-05 | 0.002622884 |
| COX7B    | 0.276597047 | 1.21133428  | 0.001863492 | 0.024805015 |
| CHCHD5   | 0.277658448 | 1.212225796 | 0.003043064 | 0.033548549 |
| TIMM17B  | 0.277751447 | 1.21230394  | 0.001925033 | 0.025270235 |
| MMACHC   | 0.283829602 | 1.217422219 | 0.000846198 | 0.015500393 |
| ATP5J2   | 0.284025598 | 1.217587623 | 0.001747423 | 0.023912059 |
| MMAB     | 0.284195155 | 1.217730731 | 0.002216462 | 0.027644922 |
| NDUFAF1  | 0.285666472 | 1.218973254 | 0.000133369 | 0.00560438  |
| COA6     | 0.286396127 | 1.219589916 | 0.000456046 | 0.011002896 |
| NDUFAF4  | 0.286743181 | 1.219883335 | 0.004520309 | 0.042543806 |
| MRPL51   | 0.287213378 | 1.220280979 | 2.96369E-05 | 0.00261388  |
| MRPL17   | 0.288317474 | 1.221215219 | 0.000245127 | 0.007895962 |
| ATP5J    | 0.288619228 | 1.221470675 | 0.000354902 | 0.009560361 |
| NDUFS5   | 0.288904016 | 1.221711817 | 0.001003796 | 0.01718877  |
| HSD17B10 | 0.28906531  | 1.221848413 | 0.001781838 | 0.024153315 |
| MRPS7    | 0.289248913 | 1.22200392  | 0.000738353 | 0.014388678 |
| ACAA2    | 0.289289576 | 1.222038363 | 0.00089563  | 0.016067857 |
| PET100   | 0.289842287 | 1.222506628 | 0.000539396 | 0.012137956 |
| STOML2   | 0.291933454 | 1.22427992  | 0.000117071 | 0.005270659 |
| GPX1     | 0.292173968 | 1.224484039 | 0.001413322 | 0.021012309 |
| PRDX5    | 0.293243129 | 1.225391823 | 0.002217377 | 0.027644922 |
| NCEH1    | 0.293832671 | 1.225892668 | 0.000235657 | 0.007734803 |

|          |             |             |             |             |
|----------|-------------|-------------|-------------|-------------|
| COX5B    | 0.294455866 | 1.226422326 | 0.000665428 | 0.013658767 |
| COX7C    | 0.295684249 | 1.227467008 | 9.33213E-05 | 0.004774114 |
| NDUFA12  | 0.295705164 | 1.227484804 | 0.001568643 | 0.022314394 |
| COX8A    | 0.296134957 | 1.227850538 | 0.004593566 | 0.042883086 |
| RPL10A   | 0.297034411 | 1.228616285 | 0.000678847 | 0.013758613 |
| NDUFA9   | 0.297424987 | 1.228948949 | 0.000187998 | 0.006754357 |
| NDUFC2   | 0.298841478 | 1.230156169 | 9.66836E-05 | 0.004873057 |
| COX14    | 0.299483519 | 1.230703746 | 8.63393E-05 | 0.004578287 |
| ATP5G1   | 0.299798366 | 1.230972358 | 0.001010778 | 0.01726152  |
| MMADHC   | 0.300334802 | 1.231430154 | 7.23504E-05 | 0.004182101 |
| NDUFS6   | 0.30059816  | 1.231654968 | 0.000795842 | 0.01507622  |
| TMEM126B | 0.300814308 | 1.231839511 | 3.60454E-05 | 0.002905301 |
| SLC25A5  | 0.300951364 | 1.231956542 | 0.000274369 | 0.008346487 |
| NDUFA6   | 0.301482349 | 1.232410047 | 0.000350334 | 0.009521342 |
| CROT     | 0.301907816 | 1.232773552 | 0.002594597 | 0.030302804 |
| BLOC1S1  | 0.302262299 | 1.233076493 | 0.000163184 | 0.006205308 |
| COX6A1   | 0.303881734 | 1.234461407 | 0.001030088 | 0.01744959  |
| SDHD     | 0.304232489 | 1.234761571 | 0.000200726 | 0.007056272 |
| TMBIM4   | 0.304284897 | 1.234806427 | 1.03834E-05 | 0.001378118 |
| DBI      | 0.306856627 | 1.23700954  | 0.000831566 | 0.015330983 |
| PSMA6    | 0.307207729 | 1.237310623 | 6.29756E-05 | 0.003814758 |
| PYURF    | 0.309223484 | 1.239040619 | 2.64145E-07 | 0.000138973 |
| TRMT10C  | 0.310061215 | 1.239760303 | 8.30464E-05 | 0.004483651 |
| TOMM7    | 0.310708514 | 1.240316675 | 9.73601E-05 | 0.004884264 |
| C16orf91 | 0.311981519 | 1.241411589 | 0.001758091 | 0.023974053 |
| C7orf55  | 0.311983937 | 1.24141367  | 0.000987884 | 0.016987251 |
| NDUFB1   | 0.314509151 | 1.243588475 | 0.000319545 | 0.009034841 |
| HINT1    | 0.315382656 | 1.244341655 | 4.15527E-06 | 0.000823256 |
| SFXN4    | 0.315905123 | 1.244792371 | 9.96074E-05 | 0.004941817 |
| RPS18    | 0.31604448  | 1.244912617 | 0.000832144 | 0.015331307 |
| C14orf2  | 0.317490559 | 1.246161075 | 0.000181541 | 0.006639242 |
| TARS     | 0.317559233 | 1.246220395 | 0.002533341 | 0.029855204 |
| COQ3     | 0.318993675 | 1.247460103 | 0.000142281 | 0.005754582 |
| NDUFAB1  | 0.320801263 | 1.249024056 | 0.000155428 | 0.00607632  |
| ATP5E    | 0.324041258 | 1.251832258 | 1.18354E-05 | 0.00148437  |
| RPS15A   | 0.330457601 | 1.257412143 | 0.000211931 | 0.007270268 |
| NDUFA11  | 0.331769105 | 1.258555733 | 0.000268813 | 0.008240475 |
| ATP5L    | 0.334851699 | 1.261247753 | 2.70656E-05 | 0.002483227 |
| BOLA3    | 0.33511339  | 1.261476552 | 0.001851204 | 0.024725828 |
| SLIRP    | 0.335855895 | 1.262125957 | 2.31806E-05 | 0.002185453 |
| NDUFB9   | 0.336531653 | 1.262717275 | 0.000144898 | 0.005806186 |

|          |             |             |             |             |
|----------|-------------|-------------|-------------|-------------|
| UQCRH    | 0.33690374  | 1.263042986 | 0.000130566 | 0.005534595 |
| NDUFB7   | 0.338142108 | 1.264127611 | 0.001084565 | 0.018105209 |
| PHB2     | 0.338203724 | 1.264181602 | 0.000226665 | 0.007585373 |
| USMG5    | 0.339174968 | 1.265032955 | 0.000646766 | 0.013478073 |
| MRPL15   | 0.339191576 | 1.265047518 | 6.55266E-06 | 0.001112771 |
| COX6C    | 0.340341624 | 1.266056355 | 7.82721E-05 | 0.004379729 |
| NDUFA8   | 0.343126174 | 1.268502334 | 5.43307E-06 | 0.000970886 |
| MRPL13   | 0.344360075 | 1.269587716 | 1.73462E-06 | 0.000494023 |
| GARS     | 0.344874082 | 1.270040129 | 0.003828002 | 0.038492604 |
| RTN4IP1  | 0.34508348  | 1.27022448  | 4.48052E-06 | 0.000859693 |
| ATP5O    | 0.346035641 | 1.271063089 | 6.22579E-05 | 0.003814758 |
| UQCR11   | 0.346574964 | 1.271538341 | 6.0904E-05  | 0.003803187 |
| MRPL34   | 0.3493433   | 1.273980592 | 5.84264E-05 | 0.00376693  |
| SLC25A20 | 0.351592572 | 1.275968375 | 3.18371E-05 | 0.002754615 |
| MPC1     | 0.351671355 | 1.276038055 | 0.000726139 | 0.014282375 |
| MINOS1   | 0.355901536 | 1.279785066 | 1.77565E-07 | 0.00011841  |
| HSPE1    | 0.357823049 | 1.281490736 | 3.81603E-05 | 0.002964035 |
| RPL35A   | 0.361887689 | 1.285106291 | 3.71127E-05 | 0.002941993 |
| TOMM5    | 0.362514453 | 1.285664713 | 7.1891E-06  | 0.001136168 |
| NDUFA13  | 0.362806927 | 1.285925379 | 5.52009E-05 | 0.003680404 |
| NDUFA4   | 0.364582868 | 1.287509314 | 7.58695E-05 | 0.004294716 |
| MRPL54   | 0.368783333 | 1.291263411 | 6.31718E-05 | 0.003814758 |
| FUNDC1   | 0.369063884 | 1.291514539 | 0.000963034 | 0.016814303 |
| PARK7    | 0.375140691 | 1.296966028 | 2.28905E-07 | 0.00013316  |
| MTFP1    | 0.375820303 | 1.297577135 | 0.000190591 | 0.00680228  |
| TMEM70   | 0.376857023 | 1.298509909 | 5.36163E-07 | 0.000231135 |
| MDH1     | 0.377971707 | 1.299513578 | 2.27008E-07 | 0.00013316  |
| ATP5G3   | 0.379451229 | 1.300846946 | 0.000104047 | 0.005013008 |
| NDUFA1   | 0.381559748 | 1.302749543 | 9.575E-06   | 0.001315528 |
| NDUFB6   | 0.381917463 | 1.303072598 | 1.61199E-05 | 0.001798912 |
| NDUFB2   | 0.382877813 | 1.303940295 | 3.12837E-07 | 0.000158394 |
| TMEM126A | 0.382921702 | 1.303979964 | 1.70483E-06 | 0.000494023 |
| TIMM17A  | 0.384154505 | 1.305094709 | 8.75541E-05 | 0.004621265 |
| RPS14    | 0.386415208 | 1.307141396 | 6.94484E-05 | 0.004092217 |
| TIMM8B   | 0.388106395 | 1.308674579 | 2.05771E-06 | 0.000535807 |
| COX7A2L  | 0.390950759 | 1.311257258 | 1.36995E-06 | 0.000445903 |
| UQCR10   | 0.398110521 | 1.3177809   | 1.51334E-05 | 0.001724004 |
| RDH11    | 0.399653487 | 1.319191023 | 0.00501523  | 0.045419477 |
| SLC25A42 | 0.400099933 | 1.319599314 | 0.003601677 | 0.037182806 |
| C19orf70 | 0.40051144  | 1.319975764 | 7.54586E-05 | 0.004294716 |
| CHCHD1   | 0.402159798 | 1.32148477  | 1.42793E-07 | 0.00010274  |

|        |             |             |             |             |
|--------|-------------|-------------|-------------|-------------|
| RPL34  | 0.408586159 | 1.32738434  | 3.86E-06    | 0.000804157 |
| CYCS   | 0.40988373  | 1.328578736 | 0.00039863  | 0.010192935 |
| MRPL14 | 0.414075969 | 1.332444987 | 1.03291E-05 | 0.001378118 |
| GLRX5  | 0.417018991 | 1.335165879 | 6.11766E-05 | 0.003803187 |
| ROMO1  | 0.427231705 | 1.344650936 | 0.000394938 | 0.010138979 |
| UQCRQ  | 0.431414371 | 1.348555008 | 2.22598E-05 | 0.002132932 |
| PRDX4  | 0.455762045 | 1.371507057 | 3.96667E-05 | 0.003008214 |
| FDPS   | 0.456081535 | 1.371810816 | 0.000871909 | 0.015849058 |
| COX7A2 | 0.460174165 | 1.375707886 | 5.17312E-06 | 0.000946517 |
| LDHB   | 0.515420374 | 1.429410582 | 8.14967E-05 | 0.00444751  |
| RMDN3  | 0.537190161 | 1.45114347  | 6.97994E-06 | 0.001123729 |
| IDI1   | 0.556940963 | 1.471146544 | 0.002815851 | 0.032011721 |
| ACSL1  | 0.721576781 | 1.648983292 | 0.000221039 | 0.007424364 |

Abbreviations: FC, fold change; FDR, false discovery rate

**Supplementary Table 3. Differentially expressed (FDR < 0.05) mitochondrial protein genes grouped into functional categories**

| Gene                            | Description                                                         | LogFC    |
|---------------------------------|---------------------------------------------------------------------|----------|
| <b>Nuclear-DNA OXPHOS genes</b> |                                                                     |          |
| NDUFA1                          | "NADH dehydrogenase (ubiquinone) 1 alpha subcomplex, 1, 7.5kDa"     | 0.38156  |
| NDUFA11                         | "NADH dehydrogenase (ubiquinone) 1 alpha subcomplex, 11, 14.7kDa"   | 0.331769 |
| NDUFA12                         | "NADH dehydrogenase (ubiquinone) 1 alpha subcomplex, 12"            | 0.295705 |
| NDUFA13                         | "NADH dehydrogenase (ubiquinone) 1 alpha subcomplex, 13"            | 0.362807 |
| NDUFA2                          | "NADH dehydrogenase (ubiquinone) 1 alpha subcomplex, 2, 8kDa"       | 0.271502 |
| NDUFA4                          | "NADH dehydrogenase (ubiquinone) 1 alpha subcomplex, 4, 9kDa"       | 0.364583 |
| NDUFA6                          | "NADH dehydrogenase (ubiquinone) 1 alpha subcomplex, 6, 14kDa"      | 0.301482 |
| NDUFA7                          | "NADH dehydrogenase (ubiquinone) 1 alpha subcomplex, 7, 14.5kDa"    | 0.25864  |
| NDUFA8                          | "NADH dehydrogenase (ubiquinone) 1 alpha subcomplex, 8, 19kDa"      | 0.343126 |
| NDUFA9                          | "NADH dehydrogenase (ubiquinone) 1 alpha subcomplex, 9, 39kDa"      | 0.297425 |
| NDUFAB1                         | "NADH dehydrogenase (ubiquinone) 1, alpha/beta subcomplex, 1, 8kDa" | 0.320801 |
| NDUFB1                          | "NADH dehydrogenase (ubiquinone) 1 beta subcomplex, 1, 7kDa"        | 0.314509 |
| NDUFB11                         | "NADH dehydrogenase (ubiquinone) 1 beta subcomplex, 11, 17.3kDa"    | 0.2438   |
| NDUFB2                          | "NADH dehydrogenase (ubiquinone) 1 beta subcomplex, 2, 8kDa"        | 0.382878 |
| NDUFB4                          | "NADH dehydrogenase (ubiquinone) 1 beta subcomplex, 4, 15kDa"       | 0.251758 |
| NDUFB5                          | "NADH dehydrogenase (ubiquinone) 1 beta subcomplex, 5, 16kDa"       | 0.249672 |
| NDUFB6                          | "NADH dehydrogenase (ubiquinone) 1 beta subcomplex, 6, 17kDa"       | 0.381917 |
| NDUFB7                          | "NADH dehydrogenase (ubiquinone) 1 beta subcomplex, 7, 18kDa"       | 0.338142 |
| NDUFB8                          | "NADH dehydrogenase (ubiquinone) 1 beta subcomplex, 8, 19kDa"       | 0.25026  |
| NDUFB9                          | "NADH dehydrogenase (ubiquinone) 1 beta subcomplex, 9, 22kDa"       | 0.336532 |
| NDUFC1                          | "NADH dehydrogenase (ubiquinone) 1, subcomplex"                     | 0.268607 |

|               |                                                                                                        |          |
|---------------|--------------------------------------------------------------------------------------------------------|----------|
|               | unknown, 1, 6kDa"                                                                                      |          |
| NDUFC2        | "NADH dehydrogenase (ubiquinone) 1, subcomplex unknown, 2, 14.5kDa"                                    | 0.298841 |
| NDUFC2-KCTD14 | NDUFC2-KCTD14 Readthrough                                                                              | 0.333788 |
| NDUFS3        | "NADH dehydrogenase (ubiquinone) Fe-S protein 3, 30kDa (NADH-coenzyme Q reductase)"                    | 0.244056 |
| NDUFS4        | "NADH dehydrogenase (ubiquinone) Fe-S protein 4, 18kDa (NADH-coenzyme Q reductase)"                    | 0.259741 |
| NDUFS5        | "NADH dehydrogenase (ubiquinone) Fe-S protein 5, 15kDa (NADH-coenzyme Q reductase)"                    | 0.288904 |
| NDUFS6        | "NADH dehydrogenase (ubiquinone) Fe-S protein 6, 13kDa (NADH-coenzyme Q reductase)"                    | 0.300598 |
| NDUFV2        | "NADH dehydrogenase (ubiquinone) flavoprotein 2, 24kDa"                                                | 0.199284 |
| SDHC          | "succinate dehydrogenase complex, subunit C, integral membrane protein, 15kDa"                         | 0.160758 |
| SDHD          | "succinate dehydrogenase complex, subunit D, integral membrane protein"                                | 0.304232 |
| UQCRC1        | "ubiquinol-cytochrome c reductase, complex III subunit X"                                              | 0.398111 |
| UQCRC2        | "ubiquinol-cytochrome c reductase, complex III subunit XI"                                             | 0.346575 |
| UQCRC3        | "ubiquinol-cytochrome c reductase, Rieske iron-sulfur polypeptide 1"                                   | 0.230628 |
| UQCRC4        | ubiquinol-cytochrome c reductase hinge protein                                                         | 0.336904 |
| UQCRC5        | Ubiquinol-Cytochrome C Reductase Hinge Protein Like                                                    | 0.416733 |
| UQCRC6        | "ubiquinol-cytochrome c reductase, complex III subunit VII, 9.5kDa"                                    | 0.431414 |
| COX4I1        | cytochrome c oxidase subunit IV isoform 1                                                              | 0.203778 |
| COX5B         | cytochrome c oxidase subunit Vb                                                                        | 0.294456 |
| COX6A1        | cytochrome c oxidase subunit VIa polypeptide 1                                                         | 0.303882 |
| COX6C         | cytochrome c oxidase subunit VIc                                                                       | 0.340342 |
| COX7A2        | cytochrome c oxidase subunit VIIa polypeptide 2 (liver)                                                | 0.460174 |
| COX7A2L       | cytochrome c oxidase subunit VIIa polypeptide 2 like                                                   | 0.390951 |
| COX7B         | cytochrome c oxidase subunit VIIb                                                                      | 0.276597 |
| COX7C         | cytochrome c oxidase subunit VIIc                                                                      | 0.295684 |
| COX8A         | cytochrome c oxidase subunit VIIIA (ubiquitous)                                                        | 0.296135 |
| atp5a1        | "ATP synthase, H <sup>+</sup> transporting, mitochondrial F1 complex, alpha subunit 1, cardiac muscle" | 0.22946  |
| atp5b         | "ATP synthase, H <sup>+</sup> transporting, mitochondrial F1 complex, beta polypeptide"                | 0.245981 |
| atp5c1        | "ATP synthase, H <sup>+</sup> transporting, mitochondrial F1                                           | 0.241421 |

|                                   |                                                                                               |          |
|-----------------------------------|-----------------------------------------------------------------------------------------------|----------|
|                                   | complex, gamma polypeptide 1"                                                                 |          |
| atp5e                             | "ATP synthase, H <sup>+</sup> transporting, mitochondrial F1 complex, epsilon subunit"        | 0.324041 |
| atp5f1                            | "ATP synthase, H <sup>+</sup> transporting, mitochondrial Fo complex, subunit B1"             | 0.222581 |
| atp5g1                            | "ATP synthase, H <sup>+</sup> transporting, mitochondrial Fo complex, subunit C1 (subunit 9)" | 0.299798 |
| atp5g2                            | "ATP synthase, H <sup>+</sup> transporting, mitochondrial Fo complex, subunit C2 (subunit 9)" | 0.25618  |
| atp5g3                            | "ATP synthase, H <sup>+</sup> transporting, mitochondrial Fo complex, subunit C3 (subunit 9)" | 0.379451 |
| atp5i                             | "ATP synthase, H <sup>+</sup> transporting, mitochondrial Fo complex, subunit E"              | 0.243664 |
| atp5j                             | "ATP synthase, H <sup>+</sup> transporting, mitochondrial Fo complex, subunit F6"             | 0.288619 |
| atp5j2                            | "ATP synthase, H <sup>+</sup> transporting, mitochondrial Fo complex, subunit F2"             | 0.284026 |
| atp5l                             | "ATP synthase, H <sup>+</sup> transporting, mitochondrial Fo complex, subunit G"              | 0.334852 |
| atp5o                             | "ATP synthase, H <sup>+</sup> transporting, mitochondrial F1 complex, O subunit"              | 0.346036 |
| <b>Other genes related to ETC</b> |                                                                                               |          |
| COA6                              | cytochrome c oxidase assembly factor 6 homolog (S. cerevisiae)                                | 0.286396 |
| COA3                              | cytochrome c oxidase assembly factor 3                                                        | 0.271809 |
| COA7                              | cytochrome c oxidase assembly factor 7 (putative)                                             | 0.213044 |
| COQ5                              | "coenzyme Q5 homolog, methyltransferase (S. cerevisiae)"                                      | 0.195057 |
| COQ3                              | coenzyme Q3 methyltransferase                                                                 | 0.318994 |
| COQ2                              | coenzyme Q2 4-hydroxybenzoate polyprenyltransferase                                           | 0.220443 |
| CMC2                              | C-x(9)-C motif containing 2                                                                   | 0.173343 |
| PET100                            | PET100 homolog (S. cerevisiae)                                                                | 0.289842 |
| HCCS                              | holocytochrome c synthase                                                                     | 0.218398 |
| MIPEP                             | mitochondrial intermediate peptidase                                                          | 0.204803 |
| CYCS                              | "cytochrome c, somatic"                                                                       | 0.409884 |
| USMG5                             | up-regulated during skeletal muscle growth 5 homolog (mouse)                                  | 0.339175 |
| <b>Carbohydrate metabolism</b>    |                                                                                               |          |
| DLD                               | dihydrolipoamide dehydrogenase                                                                | 0.201377 |
| FH                                | fumarate hydratase                                                                            | 0.257711 |
| IDH1                              | "isocitrate dehydrogenase 1 (NADP <sup>+</sup> ), soluble"                                    | 0.25708  |
| MDH1                              | "malate dehydrogenase 1, NAD (soluble)"                                                       | 0.377972 |
| PDHA1                             | pyruvate dehydrogenase (lipoamide) alpha 1                                                    | 0.154233 |



|                                                |                                                                                |          |
|------------------------------------------------|--------------------------------------------------------------------------------|----------|
| PDHB                                           | pyruvate dehydrogenase (lipoamide) beta                                        | 0.242869 |
| SDHC                                           | "succinate dehydrogenase complex, subunit C, integral membrane protein, 15kDa" | 0.160758 |
| SDHD                                           | "succinate dehydrogenase complex, subunit D, integral membrane protein"        | 0.304232 |
| MPC2                                           | mitochondrial pyruvate carrier 2                                               | 0.235772 |
| MPC1                                           | mitochondrial pyruvate carrier 1                                               | 0.351671 |
| ADH5                                           | Alcohol Dehydrogenase 5 (Class III), Chi Polypeptide                           | 0.216433 |
| AKR1A1                                         | Aldo-keto reductase family 1, member A1                                        | 0.255086 |
| BPGM                                           | Bisphosphoglycerate Mutase                                                     | 0.24898  |
| DLD                                            | dihydrolipoamide dehydrogenase                                                 | 0.201377 |
| ENO1                                           | Enolase 1                                                                      | 0.301366 |
| G6PC2                                          | Glucose-6-Phosphatase Catalytic Subunit 2                                      | 0.836332 |
| LDHB                                           | lactate dehydrogenase B                                                        | 0.51542  |
| PDHA1                                          | pyruvate dehydrogenase (lipoamide) alpha 1                                     | 0.154233 |
| PDHB                                           | pyruvate dehydrogenase (lipoamide) beta                                        | 0.242869 |
| PGK1                                           | Phosphoglycerate Kinase 1                                                      | 0.245175 |
| TPI1                                           | triosephosphate isomerase 1                                                    | 0.240579 |
| <b>Mitochondrial quality control</b>           |                                                                                |          |
| HSPA9                                          | heat shock 70kDa protein 9 (mortalin)                                          | 0.239958 |
| HSPD1                                          | heat shock 60kDa protein 1 (chaperonin)                                        | 0.248303 |
| HSPE1                                          | heat shock 10kDa protein 1                                                     | 0.357823 |
| YME1L1                                         | YME1-like 1 ATPase                                                             | 0.166397 |
| OMA1                                           | OMA1 zinc metallopeptidase                                                     | 0.220977 |
| TFAM                                           | Transcription factor A, mitochondrial                                          | 0.195915 |
| <b>Mitophagy</b>                               |                                                                                |          |
| FUNDC1                                         | FUN14 domain containing 1                                                      | 0.369064 |
| PHB2                                           | prohibitin 2                                                                   | 0.338204 |
| PARK7                                          | parkinson protein 7                                                            | 0.375141 |
| PARL                                           | "presenilin associated, rhomboid-like"                                         | 0.169786 |
| <b>Protein translocation into mitochondria</b> |                                                                                |          |
| TIMM8B                                         | translocase of inner mitochondrial membrane 8 homolog B (yeast)                | 0.388106 |
| TIMM17A                                        | translocase of inner mitochondrial membrane 17 homolog A (yeast)               | 0.384155 |
| TIMM21                                         | translocase of inner mitochondrial membrane 21 homolog (yeast)                 | 0.209567 |
| TIMM17B                                        | translocase of inner mitochondrial membrane 17 homolog B (yeast)               | 0.277751 |
| TIMM23                                         | translocase of inner mitochondrial membrane 23 homolog (yeast)                 | 0.216929 |
| TIMM10B                                        | translocase of inner mitochondrial membrane 10                                 | 0.172719 |

|                                  |                                                                 |          |
|----------------------------------|-----------------------------------------------------------------|----------|
|                                  | homolog B (yeast)                                               |          |
| TIMMDC1                          | translocase of inner mitochondrial membrane domain containing 1 | 0.213329 |
| MPV17                            | MpV17 mitochondrial inner membrane protein                      | 0.174976 |
| CHCHD5                           | coiled-coil-helix-coiled-coil-helix domain containing 5         | 0.277658 |
| SMDT1                            | single-pass membrane protein with aspartate-rich tail 1         | 0.22644  |
| MINOS1                           | mitochondrial inner membrane organizing system 1                | 0.355902 |
| CHCHD3                           | coiled-coil-helix-coiled-coil-helix domain containing 3         | 0.233207 |
| CHCHD4                           | coiled-coil-helix-coiled-coil-helix domain containing 4         | 0.263463 |
| TMEM126A                         | transmembrane protein 126A                                      | 0.382922 |
| TMEM70                           | transmembrane protein 70                                        | 0.376857 |
| TMEM14C                          | transmembrane protein 14C                                       | 0.256299 |
| TMEM205                          | transmembrane protein 205                                       | 0.223806 |
| TMEM126B                         | transmembrane protein 126B                                      | 0.300814 |
| TOMM7                            | translocase of outer mitochondrial membrane 7 homolog (yeast)   | 0.310709 |
| TOMM22                           | translocase of outer mitochondrial membrane 22 homolog (yeast)  | 0.258962 |
| TOMM6                            | translocase of outer mitochondrial membrane 6 homolog (yeast)   | 0.229816 |
| TOMM5                            | translocase of outer mitochondrial membrane 5 homolog (yeast)   | 0.362514 |
| SAMM50                           | SAMM50 sorting and assembly machinery component                 | 0.191326 |
| MTX2                             | metaxin 2                                                       | 0.217102 |
| VDAC3                            | voltage-dependent anion channel 3                               | 0.242552 |
| GRPEL1                           | "GrpE-like 1, mitochondrial (E. coli)"                          | 0.250697 |
| GRPEL2                           | "GrpE-like 2, mitochondrial (E. coli)"                          | 0.220347 |
| <b>Mitochondrial translation</b> |                                                                 |          |
| MRPS23                           | mitochondrial ribosomal protein S23                             | 0.223887 |
| MRPL34                           | mitochondrial ribosomal protein L34                             | 0.349343 |
| MRPS14                           | mitochondrial ribosomal protein S14                             | 0.194617 |
| MRPS17                           | mitochondrial ribosomal protein S17                             | 0.200933 |
| MRPL17                           | mitochondrial ribosomal protein L17                             | 0.288317 |
| MRPL11                           | mitochondrial ribosomal protein L11                             | 0.26872  |
| MRPL13                           | mitochondrial ribosomal protein L13                             | 0.34436  |
| MRPL33                           | mitochondrial ribosomal protein L33                             | 0.217065 |
| MRPL15                           | mitochondrial ribosomal protein L15                             | 0.339192 |
| MRPS7                            | mitochondrial ribosomal protein S7                              | 0.289249 |

|                              |                                                                      |          |
|------------------------------|----------------------------------------------------------------------|----------|
| MRPL3                        | mitochondrial ribosomal protein L3                                   | 0.258642 |
| MRPL36                       | mitochondrial ribosomal protein L36                                  | 0.262317 |
| MRPS18C                      | mitochondrial ribosomal protein S18C                                 | 0.184028 |
| MRPL20                       | mitochondrial ribosomal protein L20                                  | 0.256391 |
| MRPS21                       | mitochondrial ribosomal protein S21                                  | 0.215154 |
| MRPL22                       | mitochondrial ribosomal protein L22                                  | 0.246549 |
| MRPL47                       | mitochondrial ribosomal protein L47                                  | 0.258767 |
| MRPS16                       | mitochondrial ribosomal protein S16                                  | 0.226633 |
| MRPL27                       | mitochondrial ribosomal protein L27                                  | 0.254495 |
| MRPL51                       | mitochondrial ribosomal protein L51                                  | 0.287213 |
| MRPL18                       | mitochondrial ribosomal protein L18                                  | 0.245949 |
| MRPL54                       | mitochondrial ribosomal protein L54                                  | 0.368783 |
| MRPL35                       | mitochondrial ribosomal protein L35                                  | 0.218113 |
| MRPL57                       | mitochondrial ribosomal protein L57                                  | 0.216528 |
| MRPL50                       | mitochondrial ribosomal protein L50                                  | 0.261532 |
| MRPL14                       | mitochondrial ribosomal protein L14                                  | 0.414076 |
| MRPS22                       | mitochondrial ribosomal protein S22                                  | 0.187956 |
| MRPS33                       | mitochondrial ribosomal protein S33                                  | 0.26738  |
| MRPL39                       | mitochondrial ribosomal protein L39                                  | 0.254063 |
| MRPL48                       | mitochondrial ribosomal protein L48                                  | 0.197619 |
| YARS2                        | "tyrosyl-tRNA synthetase 2, mitochondrial"                           | 0.15509  |
| MARS2                        | "methionyl-tRNA synthetase 2, mitochondrial"                         | 0.243136 |
| DARS2                        | "aspartyl-tRNA synthetase 2, mitochondrial"                          | 0.160673 |
| GARS                         | glycyl-tRNA synthetase                                               | 0.344874 |
| KARS                         | lysyl-tRNA synthetase                                                | 0.181243 |
| TARS                         | threonyl-tRNA synthetase                                             | 0.317559 |
| RARS                         | arginyl-tRNA synthetase                                              | 0.252413 |
| GFM1                         | "G elongation factor, mitochondrial 1"                               | 0.23475  |
| GFM2                         | "G elongation factor, mitochondrial 2"                               | 0.249545 |
| TRMT10C                      | tRNA methyltransferase 10 homolog C (S. cerevisiae)                  | 0.310061 |
| RNMTL1                       | RNA methyltransferase like 1                                         | 0.201375 |
| MTO1                         | mitochondrial tRNA translation optimization 1                        | 0.181517 |
| CHCHD1                       | coiled-coil-helix-coiled-coil-helix domain containing 1              | 0.40216  |
| DAP3                         | death associated protein 3                                           | 0.171288 |
| FTSJ2                        | FtsJ RNA methyltransferase homolog 2 (E. coli)                       | 0.19822  |
| MALSU1                       | mitochondrial assembly of ribosomal large subunit 1                  | 0.1812   |
| <b>Fe-S cluster assembly</b> |                                                                      |          |
| ISCA2                        | iron-sulfur cluster assembly 2                                       | 0.222193 |
| UQCRCF1                      | "ubiquinol-cytochrome c reductase, Rieske iron-sulfur polypeptide 1" | 0.230628 |

|                                   |                                                                                                    |          |
|-----------------------------------|----------------------------------------------------------------------------------------------------|----------|
| NFU1                              | NFU1 iron-sulfur cluster scaffold homolog (S. cerevisiae)                                          | 0.201402 |
| CISD1                             | CDGSH iron sulfur domain 1                                                                         | 0.2229   |
| GLRX5                             | glutaredoxin 5                                                                                     | 0.417019 |
| BOLA3                             | bolA family member 3                                                                               | 0.335113 |
| <b>Mitochondrial transporters</b> |                                                                                                    |          |
| SLC25A3                           | "solute carrier family 25 (mitochondrial carrier; phosphate carrier), member 3"                    | 0.242856 |
| SLC25A20                          | "solute carrier family 25 (carnitine/acylcarnitine translocase), member 20"                        | 0.351593 |
| SLC25A11                          | "solute carrier family 25 (mitochondrial carrier; oxoglutarate carrier), member 11"                | 0.27055  |
| SLC25A42                          | "solute carrier family 25, member 42"                                                              | 0.4001   |
| SLC25A5                           | "solute carrier family 25 (mitochondrial carrier; adenine nucleotide translocator), member 5"      | 0.300951 |
| SLC25A17                          | "solute carrier family 25 (mitochondrial carrier; peroxisomal membrane protein, 34kDa), member 17" | 0.17913  |
| <b>Antioxidant genes</b>          |                                                                                                    |          |
| GPX1                              | glutathione peroxidase 1                                                                           | 0.292174 |
| PRDX3                             | peroxiredoxin 3                                                                                    | 0.252434 |
| PRDX4                             | peroxiredoxin 4                                                                                    | 0.455762 |
| PRDX5                             | peroxiredoxin 5                                                                                    | 0.293243 |
| ROMO1                             | reactive oxygen species modulator 1                                                                | 0.427232 |

Abbreviations: FDR, false discovery rate; FC, fold change

**Supplementary Table 4. Differentially expressed genes in type 1 and type 2 diabetes mellitus**

| Symbol        | Ensembl ID      | T1DM vs Control |          | T2DM vs Control |          |
|---------------|-----------------|-----------------|----------|-----------------|----------|
|               |                 | log2FC          | FDR      | log2FC          | FDR      |
| LUC7L         | ENSG00000007392 | -0.2561717      | 0.020322 | -0.29107        | 0.018995 |
| RP11-96C23.13 | ENSG00000151303 | -0.5599426      | 0.008917 | -0.60363        | 0.003833 |
| MAB21L3       | ENSG00000173212 | -0.6765525      | 0.001103 | -0.55437        | 0.04632  |
| IRS2          | ENSG00000185950 | -0.6308078      | 0.027633 | -0.56182        | 0.042392 |
| KRT5          | ENSG00000186081 | -2.818464       | 0.048197 | -3.65685        | 0.035675 |
| MT-ND6        | ENSG00000198695 | -1.2263923      | 0.002505 | -1.00379        | 0.03824  |
| MT-ND1        | ENSG00000198888 | -1.2722522      | 0.000821 | -1.10323        | 0.009463 |
| MT-ATP6       | ENSG00000198899 | -0.9963554      | 0.000341 | -0.91969        | 0.000698 |
| MT-RNR2       | ENSG00000210082 | -1.3736696      | 0.002505 | -1.39282        | 0.00826  |
| MT-RNR1       | ENSG00000211459 | -2.3614739      | 4.17E-06 | -2.34382        | 4.71E-05 |
| MT-ND4L       | ENSG00000212907 | -1.2071991      | 0.000487 | -0.96116        | 0.019481 |
| RNA45S5       | ENSG00000225840 | -3.9922617      | 1.21E-07 | -4.21218        | 2.39E-08 |
| RNA28S5       | ENSG00000226958 | -5.2331639      | 2.55E-10 | -5.46535        | 3.85E-09 |
| MT-ATP8       | ENSG00000228253 | -1.2365491      | 3.32E-05 | -1.14857        | 0.000337 |
| KLF3-AS1      | ENSG00000231160 | -0.4400777      | 0.013127 | -0.48887        | 0.008452 |
| MTRNR2L4      | ENSG00000232196 | -1.1071813      | 0.008202 | -1.11995        | 0.015286 |
| RP1-122P22.2  | ENSG00000233895 | -0.3429591      | 0.026814 | -0.44681        | 0.02349  |
| RP11-69I8.2   | ENSG00000236673 | -0.820645       | 0.019855 | -0.83647        | 0.040175 |
| BMS1P3        | ENSG00000240089 | -0.5909965      | 0.02043  | -0.62614        | 0.015012 |
| MTATP8P1      | ENSG00000240409 | -1.5322122      | 2.55E-07 | -1.27309        | 0.000351 |
| RN7SL438P     | ENSG00000241774 | -3.8703949      | 0.004105 | -3.96436        | 0.003965 |
| RN7SL434P     | ENSG00000241868 | -0.9946898      | 0.015878 | -1.04527        | 0.020193 |
| MTATP6P1      | ENSG00000248527 | -1.1331421      | 3.32E-05 | -1.01559        | 0.000351 |
| LINC00939     | ENSG00000249267 | -2.4070137      | 0.007563 | -2.91245        | 0.000664 |
| MTRNR2L1      | ENSG00000256618 | -2.9663933      | 1.16E-05 | -2.02297        | 0.026507 |
| RP3-405J10.4  | ENSG00000257256 | -0.6482887      | 0.002906 | -0.5701         | 0.028493 |
| RP11-680F8.4  | ENSG00000259644 | -0.527206       | 0.016268 | -0.51019        | 0.019186 |
| RP11-96C23.11 | ENSG00000261011 | -0.5735926      | 0.026583 | -0.74305        | 0.003965 |
| RP11-846F4.9  | ENSG00000264316 | -2.9056012      | 0.009506 | -3.35126        | 0.021211 |
| CTD-2104P17.2 | ENSG00000264932 | -0.5303005      | 0.048958 | -0.63282        | 0.029243 |
| MTRNR2L12     | ENSG00000269028 | -1.8422783      | 0.001119 | -1.57001        | 0.033921 |
| RP11-345P4.6  | ENSG00000269227 | -0.6354254      | 0.022949 | -0.77677        | 0.020137 |
| BMS1P7        | ENSG00000270025 | -0.7154225      | 0.003144 | -0.63607        | 0.038272 |
| AC002128.5    | ENSG00000271366 | -0.4137993      | 0.049487 | -0.47657        | 0.034305 |
| AGAP11        | ENSG00000271880 | -0.5696366      | 0.01632  | -0.67523        | 0.002472 |

|               |                 |            |          |          |          |
|---------------|-----------------|------------|----------|----------|----------|
| RP11-96C23.14 | ENSG00000272508 | -0.5965901 | 0.012522 | -0.64205 | 0.005691 |
| MIR6087       | ENSG00000275110 | -3.19458   | 0.004627 | -3.26729 | 0.012189 |
| AL353644.10   | ENSG00000277048 | -2.3748232 | 1.04E-06 | -2.46317 | 2.13E-06 |
| NLRP2         | ENSG00000022556 | 1.60170078 | 0.012404 | 1.573323 | 0.015422 |
| SCGN          | ENSG00000079689 | 0.51997213 | 0.008965 | 0.536767 | 0.009463 |
| CPA1          | ENSG00000091704 | 3.7161611  | 0.027074 | 7.46787  | 0.000236 |
| LIPG          | ENSG00000101670 | 0.7327793  | 0.043684 | 0.647614 | 0.029527 |
| SRSF7         | ENSG00000115875 | 0.33951751 | 0.004627 | 0.307107 | 0.013895 |
| COX7A2L       | ENSG00000115944 | 0.38854805 | 0.012673 | 0.402745 | 0.030606 |
| NPC2          | ENSG00000119655 | 0.40396009 | 0.007775 | 0.464385 | 0.019186 |
| SEC61G        | ENSG00000132432 | 0.54567099 | 0.001119 | 0.414254 | 0.041663 |
| PLIN2         | ENSG00000147872 | 1.11806111 | 0.000399 | 1.1374   | 0.020137 |
| H2AFZ         | ENSG00000164032 | 0.58692544 | 0.00043  | 0.472161 | 0.043262 |
| PPA1          | ENSG00000180817 | 0.44415857 | 0.008186 | 0.416929 | 0.041685 |
| RPL23A        | ENSG00000198242 | 0.48583429 | 0.001807 | 0.376411 | 0.020505 |
| SNORA31       | ENSG00000199477 | 0.98448513 | 4.17E-06 | 0.599536 | 0.034065 |
| SNORA33       | ENSG00000200534 | 0.72250844 | 0.002354 | 0.60487  | 0.008419 |
| RN7SKP189     | ENSG00000201912 | 1.01072383 | 0.008254 | 0.883733 | 0.038272 |
| SNORA25       | ENSG00000207112 | 0.59032345 | 0.010031 | 0.623441 | 0.024314 |
| RPL7P1        | ENSG00000214485 | 0.51950558 | 0.030828 | 0.430633 | 0.041685 |
| RP3-340B19.2  | ENSG00000219023 | 1.00951977 | 3.21E-05 | 0.666707 | 0.034065 |
| SPCS2P4       | ENSG00000228589 | 0.34586195 | 0.022053 | 0.340118 | 0.037321 |
| ST13P4        | ENSG00000232150 | 0.48819334 | 0.015135 | 0.553027 | 0.036012 |
| FLJ43681      | ENSG00000232938 | 0.8746482  | 0.035448 | 1.382582 | 0.035371 |
| RP11-15B17.1  | ENSG00000245322 | 0.62914863 | 7.18E-05 | 0.487368 | 0.046926 |
| RP11-689K5.3  | ENSG00000251331 | 2.74856282 | 0.001103 | 2.046488 | 0.028493 |
| SNORD4A       | ENSG00000264577 | 0.50233601 | 0.002505 | 0.387108 | 0.037321 |
| SNORD3C       | ENSG00000264940 | 4.31089344 | 2.55E-07 | 1.232051 | 0.003648 |
| SNORD3B-1     | ENSG00000265185 | 2.10395409 | 0.001397 | 1.937477 | 0.019481 |
| MIR4709       | ENSG00000265649 | 0.51872046 | 0.006016 | 0.559012 | 0.015098 |
| RP11-728B21.3 | ENSG00000271266 | 0.89639777 | 0.031739 | 0.925359 | 0.041685 |
| ACEA_U3       | ENSG00000275303 | 4.31956809 | 2.55E-07 | 1.238813 | 0.003343 |
| AC091154.1    | ENSG00000276078 | 1.99406735 | 0.037134 | 2.878737 | 0.01261  |
| ACEA_U3       | ENSG00000276271 | 2.34952543 | 0.002673 | 2.174284 | 0.030606 |
| Metazoa_SRP   | ENSG00000278771 | 1.60979221 | 0.008208 | 1.442101 | 0.01527  |
| RN7SL3        | ENSG00000279868 | 1.60979171 | 0.008208 | 1.442101 | 0.01527  |

Abbreviation: DM, diabetes mellitus; FC, fold change; FDR, false discovery rate

**Supplementary Table 5. Spearman's correlation between Principal Components (PC1, 2 and 3) and loadings (Bolded values are statistically significant)**

| Genes         | PC1                        | PC2                        | PC3                       |
|---------------|----------------------------|----------------------------|---------------------------|
| MT-ND1        | <b>-0.5711<sup>c</sup></b> | <b>-0.5769<sup>c</sup></b> | <b>0.3383<sup>a</sup></b> |
| MT-ND2        | <b>-0.4735<sup>b</sup></b> | <b>-0.6753<sup>c</sup></b> | <b>0.3449<sup>a</sup></b> |
| MT-ND3        | <b>-0.3603<sup>a</sup></b> | <b>-0.3591<sup>a</sup></b> | -0.2036                   |
| MT-ND4        | <b>-0.4358<sup>b</sup></b> | <b>-0.7211<sup>c</sup></b> | <b>0.4555<sup>b</sup></b> |
| MT-ND4L       | <b>-0.4751<sup>b</sup></b> | <b>-0.7055<sup>c</sup></b> | <b>0.5257<sup>c</sup></b> |
| MT-ND5        | <b>-0.4848<sup>b</sup></b> | <b>-0.6506<sup>c</sup></b> | <b>0.5271<sup>c</sup></b> |
| MT-ND6        | <b>-0.4059<sup>a</sup></b> | <b>-0.7771<sup>c</sup></b> | <b>0.4304<sup>b</sup></b> |
| NDUFA1        | <b>0.8791<sup>c</sup></b>  | -0.2998                    | -0.1291                   |
| NDUFA11       | <b>0.8227<sup>c</sup></b>  | -0.0401                    | 0.186                     |
| NDUFA12       | <b>0.9144<sup>c</sup></b>  | <b>-0.4279<sup>b</sup></b> | 0.0366                    |
| NDUFA13       | <b>0.8852<sup>c</sup></b>  | -0.0038                    | 0.0194                    |
| NDUFA2        | <b>0.8723<sup>c</sup></b>  | -0.1269                    | 0.0706                    |
| NDUFA4        | <b>0.9144<sup>c</sup></b>  | -0.1585                    | -0.0445                   |
| NDUFA6        | <b>0.9399<sup>c</sup></b>  | -0.2899                    | 0.0018                    |
| NDUFA7        | <b>0.9032<sup>c</sup></b>  | -0.0935                    | 0.0941                    |
| NDUFA8        | <b>0.8858<sup>c</sup></b>  | <b>-0.3294<sup>a</sup></b> | 0.2158                    |
| NDUFA9        | <b>0.9028<sup>c</sup></b>  | <b>-0.3257<sup>a</sup></b> | 0.152                     |
| NDUFAB1       | <b>0.9093<sup>c</sup></b>  | -0.1842                    | 0.1229                    |
| NDUFB1        | <b>0.8154<sup>c</sup></b>  | <b>-0.3826<sup>a</sup></b> | -0.2502                   |
| NDUFB11       | <b>0.7087<sup>c</sup></b>  | 0.1453                     | 0.0449                    |
| NDUFB2        | <b>0.8609<sup>c</sup></b>  | -0.1136                    | 0.0202                    |
| NDUFB4        | <b>0.8316<sup>c</sup></b>  | <b>-0.4298<sup>b</sup></b> | -0.0474                   |
| NDUFB5        | <b>0.8263<sup>c</sup></b>  | <b>-0.4115<sup>b</sup></b> | -0.2095                   |
| NDUFB6        | <b>0.9302<sup>c</sup></b>  | -0.2794                    | -0.0761                   |
| NDUFB7        | <b>0.6735<sup>c</sup></b>  | 0.1308                     | 0.1739                    |
| NDUFB8        | <b>0.9549<sup>c</sup></b>  | -0.2498                    | 0.0654                    |
| NDUFB9        | <b>0.8974<sup>c</sup></b>  | <b>-0.4364<sup>b</sup></b> | 0.0794                    |
| NDUFC1        | <b>0.8895<sup>c</sup></b>  | -0.2464                    | 0.0245                    |
| NDUFC2        | <b>0.7909<sup>c</sup></b>  | <b>-0.4144<sup>b</sup></b> | 0.0482                    |
| NDUFC2-KCTD14 | <b>0.8455<sup>c</sup></b>  | <b>-0.3547<sup>a</sup></b> | 0.1421                    |
| NDUFS3        | <b>0.952<sup>c</sup></b>   | -0.2213                    | 0.1338                    |
| NDUFS4        | <b>0.8889<sup>c</sup></b>  | <b>-0.3445<sup>a</sup></b> | -0.0109                   |
| NDUFS5        | <b>0.8615<sup>c</sup></b>  | -0.2383                    | 0.1466                    |
| NDUFS6        | <b>0.8451<sup>c</sup></b>  | <b>-0.3387<sup>a</sup></b> | 0.1387                    |
| NDUFV2        | <b>0.8927<sup>c</sup></b>  | -0.3034                    | -0.0415                   |
| SDHC          | <b>0.6937<sup>c</sup></b>  | <b>-0.6362<sup>c</sup></b> | 0.3073                    |
| SDHD          | <b>0.8611<sup>c</sup></b>  | -0.2381                    | 0.0567                    |
| MT-CYB        | <b>-0.4771<sup>b</sup></b> | <b>-0.7047<sup>c</sup></b> | <b>0.4119<sup>b</sup></b> |

|         |                            |                            |                            |
|---------|----------------------------|----------------------------|----------------------------|
| UQCR10  | <b>0.9656<sup>c</sup></b>  | -0.2593                    | 0.0579                     |
| UQCR11  | <b>0.9306<sup>c</sup></b>  | -0.0682                    | -0.0182                    |
| UQCRFS1 | <b>0.8628<sup>c</sup></b>  | <b>-0.3265<sup>a</sup></b> | 0.2158                     |
| UQCRH   | <b>0.8565<sup>c</sup></b>  | <b>-0.3532<sup>a</sup></b> | -0.0287                    |
| UQCRHL  | <b>0.7196<sup>c</sup></b>  | -0.2909                    | 0.1314                     |
| UQCRQ   | <b>0.915<sup>c</sup></b>   | -0.0911                    | 0.0016                     |
| MT-CO1  | -0.1433                    | <b>-0.7818<sup>c</sup></b> | 0.2326                     |
| MT-CO2  | 0.0243                     | <b>-0.8524<sup>c</sup></b> | 0.2895                     |
| COX4I1  | <b>0.9002<sup>c</sup></b>  | -0.23                      | 0.0848                     |
| COX5B   | <b>0.9071<sup>c</sup></b>  | -0.0423                    | 0.1087                     |
| COX6A1  | <b>0.9385<sup>c</sup></b>  | -0.1075                    | 0.0818                     |
| COX6C   | <b>0.9091<sup>c</sup></b>  | -0.2551                    | -0.1567                    |
| COX7A2  | <b>0.9211<sup>c</sup></b>  | -0.1344                    | 0.07                       |
| COX7A2L | <b>0.8233<sup>c</sup></b>  | <b>-0.3534<sup>a</sup></b> | 0.0285                     |
| COX7B   | <b>0.9215<sup>c</sup></b>  | -0.2939                    | -0.104                     |
| COX7C   | <b>0.9158<sup>c</sup></b>  | -0.2275                    | -0.2123                    |
| COX8A   | <b>0.9071<sup>c</sup></b>  | 0.0277                     | 0.1441                     |
| MT-ATP6 | <b>-0.434<sup>b</sup></b>  | <b>-0.7393<sup>c</sup></b> | <b>0.4385<sup>b</sup></b>  |
| MT-ATP8 | <b>-0.3652<sup>a</sup></b> | <b>-0.732<sup>c</sup></b>  | <b>0.3553<sup>a</sup></b>  |
| atp5a1  | <b>0.867<sup>c</sup></b>   | <b>-0.3429<sup>a</sup></b> | 0.1239                     |
| atp5b   | <b>0.8777<sup>c</sup></b>  | -0.2927                    | 0.2686                     |
| atp5c1  | <b>0.9172<sup>c</sup></b>  | <b>-0.3609<sup>a</sup></b> | -0.081                     |
| atp5e   | <b>0.7575<sup>c</sup></b>  | -0.1194                    | <b>-0.3457<sup>a</sup></b> |
| atp5f1  | <b>0.9071<sup>c</sup></b>  | <b>-0.3872<sup>a</sup></b> | 0.0915                     |
| atp5g1  | <b>0.8407<sup>c</sup></b>  | -0.2383                    | 0.266                      |
| atp5g2  | <b>0.781<sup>c</sup></b>   | -0.0132                    | -0.13                      |
| atp5g3  | <b>0.8955<sup>c</sup></b>  | -0.2733                    | 0.2261                     |
| atp5i   | <b>0.919<sup>c</sup></b>   | -0.2498                    | -0.0364                    |
| atp5j   | <b>0.881<sup>c</sup></b>   | <b>-0.436<sup>b</sup></b>  | -0.0006                    |
| atp5j2  | <b>0.8447<sup>c</sup></b>  | <b>-0.4176<sup>b</sup></b> | 0.1164                     |
| atp5l   | <b>0.9543<sup>c</sup></b>  | -0.2077                    | -0.1211                    |
| atp5o   | <b>0.9109<sup>c</sup></b>  | <b>-0.3551<sup>a</sup></b> | 0.0271                     |

Abbreviations: PC, principal component

a:  $0.01 < P < 0.05$ , b:  $0.001 < P < 0.01$ , c :  $P < 0.001$



**Supplementary Table 6. Differentially expressed miRNAs in DGE compared to Controls**

| ID              | Symbol                                        | Expr Log Ratio | Expr p-value | Confidence              |
|-----------------|-----------------------------------------------|----------------|--------------|-------------------------|
| hsa-miR-101-3p  | miR-101-3p (and other miRNAs w/seed ACAGUAC)  | -0.689         | 1.12E-11     | High (predicted)        |
| hsa-miR-127-5p  | miR-127-5p (miRNAs w/seed UGAAGCU)            | -0.651         | 3.45E-08     | High (predicted)        |
| hsa-miR-1296-5p | miR-1296-5p (miRNAs w/seed UAGGGCC)           | -0.537         | 0.00000402   | High (predicted)        |
| hsa-miR-1307-5p | miR-1307-5p (miRNAs w/seed CGACCGG)           | -0.555         | 0.0000421    | High (predicted)        |
| hsa-miR-130a-3p | miR-130a-3p (and other miRNAs w/seed AGUGCAA) | -0.521         | 0.00000131   | High (predicted)        |
| hsa-miR-136-3p  | miR-136-3p (miRNAs w/seed AUCAUCG)            | -0.561         | 0.00000606   | High (predicted)        |
| hsa-miR-138-5p  | miR-138-5p (miRNAs w/seed GCUGGUG)            | -0.55          | 0.000735     | High (predicted)        |
| hsa-miR-1468-5p | miR-1468-5p (miRNAs w/seed UCCGUUU)           | 0.602          | 0.0000122    | High (predicted)        |
| hsa-miR-15a-5p  | miR-16-5p (and other miRNAs w/seed AGCAGCA)   | -0.662         | 0.00000193   | Experimentally Observed |
| hsa-miR-106b-5p | miR-17-5p (and other miRNAs w/seed AAAGUGC)   | -0.62          | 0.00000132   | High (predicted)        |
| hsa-miR-190a-5p | miR-190a-5p (and other miRNAs w/seed GAUAUGU) | -0.573         | 0.00156      | High (predicted)        |
| hsa-miR-192-3p  | miR-192-3p (miRNAs w/seed UGCCAAU)            | -0.503         | 0.00468      | High (predicted)        |
| hsa-miR-193b-3p | miR-193a-3p (and other miRNAs w/seed ACUGGCC) | -0.537         | 0.000864     | High (predicted)        |
| hsa-miR-199b-5p | miR-199a-5p (and other miRNAs w/seed CCAGUGU) | -0.588         | 0.000000031  | High (predicted)        |
| hsa-miR-204-3p  | miR-204-3p (and other miRNAs w/seed CUGGGAA)  | 0.627          | 0.0244       | High (predicted)        |
| hsa-miR-204-5p  | miR-204-5p (and other miRNAs w/seed UCCCUUU)  | 0.7            | 0.00191      | High (predicted)        |
| hsa-miR-21-3p   | miR-21-3p (and other miRNAs w/seed            | -0.735         | 0.000000918  | High (predicted)        |

|                 |                                               |        |            |                  |
|-----------------|-----------------------------------------------|--------|------------|------------------|
|                 | AACACCA)                                      |        |            |                  |
| hsa-miR-29c-3p  | miR-29b-3p (and other miRNAs w/seed AGCACCA)  | -0.527 | 0.0000457  | High (predicted) |
| hsa-miR-30b-5p  | miR-30c-5p (and other miRNAs w/seed GUAAACA)  | -0.738 | 0.00000012 | High (predicted) |
| hsa-miR-31-3p   | miR-31-3p (and other miRNAs w/seed GCUAUGC)   | -0.726 | 0.0000824  | High (predicted) |
| hsa-miR-324-5p  | miR-324-5p (miRNAs w/seed GCAUCCC)            | -0.523 | 0.0000763  | High (predicted) |
| hsa-miR-34c-5p  | miR-34a-5p (and other miRNAs w/seed GGCAGUG)  | -0.539 | 0.00000758 | High (predicted) |
| hsa-miR-3614-5p | miR-3614-5p (miRNAs w/seed CACUUGG)           | 0.689  | 0.0000601  | High (predicted) |
| hsa-miR-369-3p  | miR-369-3p (miRNAs w/seed AUAAUAC)            | -0.556 | 0.0000032  | High (predicted) |
| hsa-miR-374b-3p | miR-374b-3p (miRNAs w/seed UUAGCAG)           | -0.529 | 0.0000026  | High (predicted) |
| hsa-miR-378e    | miR-378a-3p (and other miRNAs w/seed CUGGACU) | -0.599 | 0.00166    | High (predicted) |
| hsa-miR-451a    | miR-451a (and other miRNAs w/seed AACCGUU)    | -0.619 | 0.00298    | High (predicted) |
| hsa-miR-582-5p  | miR-582-5p (miRNAs w/seed UACAGUU)            | -0.728 | 0.00000792 | High (predicted) |
| hsa-miR-671-3p  | miR-671-3p (and other miRNAs w/seed CCGGUUC)  | 0.515  | 0.0000175  | High (predicted) |
| hsa-miR-7974    | miR-7974 (miRNAs w/seed GGCUGUG)              | 0.708  | 0.00104    | High (predicted) |

**Supplementary Table 7. Anti-correlated miRNA-mRNA pairs**

| miRNA          | Log <sub>2</sub> FC<br>miRNA | Target mRNA | Log <sub>2</sub> F<br>C<br>mRNA | Source              | Confidence       |
|----------------|------------------------------|-------------|---------------------------------|---------------------|------------------|
| hsa-miR-101-3p | -0.689                       | CHAC2       | 0.268                           | TargetScan<br>Human | High (predicted) |
| hsa-miR-101-3p | -0.689                       | CYB561D2    | 0.251                           | TargetScan<br>Human | High (predicted) |
| hsa-miR-101-3p | -0.689                       | EED         | 0.147                           | TargetScan<br>Human | High (predicted) |
| hsa-miR-101-3p | -0.689                       | FLRT3       | 0.352                           | TargetScan<br>Human | High (predicted) |
| hsa-miR-101-3p | -0.689                       | HSPE1-MOB4  | 0.254                           | TargetScan<br>Human | High (predicted) |
| hsa-miR-101-3p | -0.689                       | MOB4        | 0.184                           | TargetScan<br>Human | High (predicted) |
| hsa-miR-101-3p | -0.689                       | NACA        | 0.242                           | TargetScan<br>Human | High (predicted) |
| hsa-miR-101-3p | -0.689                       | NDUFB5      | 0.25                            | TargetScan<br>Human | High (predicted) |
| hsa-miR-101-3p | -0.689                       | POMP        | 0.359                           | TargetScan<br>Human | High (predicted) |
| hsa-miR-101-3p | -0.689                       | RRM1        | 0.245                           | TargetScan<br>Human | High (predicted) |
| hsa-miR-21-3p  | -0.735                       | SNRPB2      | 0.24                            | TargetScan<br>Human | High (predicted) |
| hsa-miR-127-5p | -0.651                       | CCT6A       | 0.244                           | TargetScan<br>Human | High (predicted) |
| hsa-miR-127-5p | -0.651                       | KDEL2       | 0.196                           | TargetScan<br>Human | High (predicted) |
| hsa-miR-127-5p | -0.651                       | MCRIP1      | 0.273                           | TargetScan<br>Human | High (predicted) |

|                 |        |         |       |                  |                  |
|-----------------|--------|---------|-------|------------------|------------------|
| hsa-miR-127-5p  | -0.651 | PEF1    | 0.284 | TargetScan Human | High (predicted) |
| hsa-miR-127-5p  | -0.651 | PIGY    | 0.373 | TargetScan Human | High (predicted) |
| hsa-miR-127-5p  | -0.651 | PYURF   | 0.309 | TargetScan Human | High (predicted) |
| hsa-miR-127-5p  | -0.651 | YY1AP1  | 0.24  | TargetScan Human | High (predicted) |
| hsa-miR-1296-5p | -0.537 | ENOX2   | 0.158 | TargetScan Human | High (predicted) |
| hsa-miR-1296-5p | -0.537 | KANSL2  | 0.168 | TargetScan Human | High (predicted) |
| hsa-miR-1296-5p | -0.537 | TMEM107 | 0.85  | TargetScan Human | High (predicted) |
| hsa-miR-1307-5p | -0.555 | TEX30   | 0.225 | TargetScan Human | High (predicted) |
| hsa-miR-130a-3p | -0.521 | CCT6A   | 0.244 | TargetScan Human | High (predicted) |
| hsa-miR-130a-3p | -0.521 | CHMP3   | 0.14  | TargetScan Human | High (predicted) |
| hsa-miR-130a-3p | -0.521 | G0S2    | 0.833 | TargetScan Human | High (predicted) |
| hsa-miR-130a-3p | -0.521 | G3BP2   | 0.215 | TargetScan Human | High (predicted) |
| hsa-miR-130a-3p | -0.521 | MTMR6   | 0.208 | TargetScan Human | High (predicted) |
| hsa-miR-130a-3p | -0.521 | PDZD11  | 0.243 | TargetScan Human | High (predicted) |
| hsa-miR-130a-3p | -0.521 | RAB30   | 0.598 | TargetScan Human | High (predicted) |
| hsa-            | -0.521 | WDR47   | 0.202 | TargetScan       | High (predicted) |

|                |        |             |       |                  |                  |
|----------------|--------|-------------|-------|------------------|------------------|
| miR-130a-3p    |        |             |       | Human            |                  |
| hsa-miR-136-3p | -0.561 | COMMD2      | 0.202 | TargetScan Human | High (predicted) |
| hsa-miR-136-3p | -0.561 | FABP2       | 0.528 | TargetScan Human | High (predicted) |
| hsa-miR-136-3p | -0.561 | TRIAP1      | 0.263 | TargetScan Human | High (predicted) |
| hsa-miR-138-5p | -0.55  | ARL6IP5     | 0.248 | TargetScan Human | High (predicted) |
| hsa-miR-138-5p | -0.55  | CLN5        | 0.201 | TargetScan Human | High (predicted) |
| hsa-miR-138-5p | -0.55  | CTSH        | 0.312 | TargetScan Human | High (predicted) |
| hsa-miR-138-5p | -0.55  | EIF4EBP1    | 0.464 | TargetScan Human | High (predicted) |
| hsa-miR-138-5p | -0.55  | GPD1        | 0.413 | TargetScan Human | High (predicted) |
| hsa-miR-138-5p | -0.55  | H3F3A/H3F3B | 0.282 | TargetScan Human | High (predicted) |
| hsa-miR-138-5p | -0.55  | KBTBD4      | 0.247 | TargetScan Human | High (predicted) |
| hsa-miR-138-5p | -0.55  | KDELR2      | 0.196 | TargetScan Human | High (predicted) |
| hsa-miR-138-5p | -0.55  | LSM1        | 0.295 | TargetScan Human | High (predicted) |
| hsa-miR-138-5p | -0.55  | MCRIP1      | 0.273 | TargetScan Human | High (predicted) |
| hsa-miR-138-5p | -0.55  | MIF4GD      | 0.201 | TargetScan Human | High (predicted) |
| hsa-miR-       | -0.55  | MRM3        | 0.201 | TargetScan Human | High (predicted) |

|                |        |                          |       |                  |                                        |
|----------------|--------|--------------------------|-------|------------------|----------------------------------------|
| 138-5p         |        |                          |       |                  |                                        |
| hsa-miR-138-5p | -0.55  | PACSIN2                  | 0.263 | TargetScan Human | High (predicted)                       |
| hsa-miR-138-5p | -0.55  | PHB                      | 0.264 | TargetScan Human | High (predicted)                       |
| hsa-miR-138-5p | -0.55  | RHBDD1                   | 0.122 | TargetScan Human | High (predicted)                       |
| hsa-miR-138-5p | -0.55  | RIMBP3 (includes others) | 0.655 | TargetScan Human | High (predicted)                       |
| hsa-miR-138-5p | -0.55  | RPS15A                   | 0.33  | TargetScan Human | High (predicted)                       |
| hsa-miR-138-5p | -0.55  | RSPH10B/RSPH10B2         | 0.354 | TargetScan Human | High (predicted), Moderate (predicted) |
| hsa-miR-138-5p | -0.55  | ST6GALNAC4               | 0.419 | TargetScan Human | High (predicted)                       |
| hsa-miR-138-5p | -0.55  | TMEM199                  | 0.24  | TargetScan Human | High (predicted)                       |
| hsa-miR-15a-5p | -0.662 | ADSS                     | 0.182 | TarBase          | Experimentally Observed                |
| hsa-miR-15a-5p | -0.662 | ANAPC16                  | 0.223 | miRecords        | Experimentally Observed                |
| hsa-miR-15a-5p | -0.662 | ARL3                     | 0.294 | TargetScan Human | High (predicted)                       |
| hsa-miR-15a-5p | -0.662 | CHAC1                    | 1.284 | TargetScan Human | High (predicted)                       |
| hsa-miR-15a-5p | -0.662 | DTD1                     | 0.218 | TarBase          | Experimentally Observed                |
| hsa-miR-15a-5p | -0.662 | EMC4                     | 0.255 | TargetScan Human | High (predicted)                       |
| hsa-miR-15a-5p | -0.662 | G0S2                     | 0.833 | TargetScan Human | High (predicted)                       |

|                |        |             |       |                          |                                              |
|----------------|--------|-------------|-------|--------------------------|----------------------------------------------|
| hsa-miR-15a-5p | -0.662 | GFM1        | 0.235 | TarBase                  | Experimentally Observed                      |
| hsa-miR-15a-5p | -0.662 | H3F3A/H3F3B | 0.282 | miRecords                | Experimentally Observed                      |
| hsa-miR-15a-5p | -0.662 | HSPA4L      | 0.359 | TargetScan Human         | High (predicted)                             |
| hsa-miR-15a-5p | -0.662 | HSPE1-MOB4  | 0.254 | TargetScan Human         | High (predicted)                             |
| hsa-miR-15a-5p | -0.662 | LAMTOR5     | 0.288 | TarBase                  | Experimentally Observed                      |
| hsa-miR-15a-5p | -0.662 | LMAN2L      | 0.221 | TargetScan Human         | High (predicted)                             |
| hsa-miR-15a-5p | -0.662 | MOB4        | 0.184 | TargetScan Human         | High (predicted)                             |
| hsa-miR-15a-5p | -0.662 | MRPL20      | 0.256 | TarBase                  | Experimentally Observed                      |
| hsa-miR-15a-5p | -0.662 | OMA1        | 0.221 | miRecords                | Experimentally Observed                      |
| hsa-miR-15a-5p | -0.662 | PCMT1       | 0.238 | TargetScan Human         | High (predicted)                             |
| hsa-miR-15a-5p | -0.662 | PEX12       | 0.165 | TargetScan Human         | High (predicted)                             |
| hsa-miR-15a-5p | -0.662 | PSAT1       | 0.965 | TarBase,TargetScan Human | Experimentally Observed,Moderate (predicted) |
| hsa-miR-15a-5p | -0.662 | PSMD7       | 0.223 | TargetScan Human         | High (predicted)                             |
| hsa-miR-15a-5p | -0.662 | RAB30       | 0.598 | TarBase,TargetScan Human | Experimentally Observed,High (predicted)     |
| hsa-miR-15a-5p | -0.662 | RARS        | 0.252 | TarBase                  | Experimentally Observed                      |
| hsa-           | -0.662 | RFT1        | 0.182 | TarBase                  | Experimentally                               |

|                 |        |          |       |                          |                                              |
|-----------------|--------|----------|-------|--------------------------|----------------------------------------------|
| miR-15a-5p      |        |          |       |                          | Observed                                     |
| hsa-miR-15a-5p  | -0.662 | RPL14    | 0.24  | TargetScan Human         | High (predicted)                             |
| hsa-miR-15a-5p  | -0.662 | SCOC     | 0.453 | TargetScan Human         | High (predicted)                             |
| hsa-miR-15a-5p  | -0.662 | SPTLC1   | 0.173 | TarBase,TargetScan Human | Experimentally Observed,Moderate (predicted) |
| hsa-miR-15a-5p  | -0.662 | SRPRB    | 0.373 | TarBase                  | Experimentally Observed                      |
| hsa-miR-15a-5p  | -0.662 | TMEM183A | 0.149 | TargetScan Human         | High (predicted)                             |
| hsa-miR-15a-5p  | -0.662 | TMEM251  | 0.204 | miRecords                | Experimentally Observed                      |
| hsa-miR-15a-5p  | -0.662 | TMEM258  | 0.415 | TargetScan Human         | High (predicted)                             |
| hsa-miR-15a-5p  | -0.662 | TPI1     | 0.241 | miRecords                | Experimentally Observed                      |
| hsa-miR-15a-5p  | -0.662 | UGP2     | 0.213 | miRecords                | Experimentally Observed                      |
| hsa-miR-15a-5p  | -0.662 | WDR83OS  | 0.318 | TargetScan Human         | High (predicted)                             |
| hsa-miR-106b-5p | -0.62  | CMTR2    | 0.176 | TargetScan Human         | High (predicted)                             |
| hsa-miR-106b-5p | -0.62  | COMMD6   | 0.318 | TargetScan Human         | High (predicted)                             |
| hsa-miR-106b-5p | -0.62  | CROT     | 0.302 | TargetScan Human         | High (predicted)                             |
| hsa-miR-106b-5p | -0.62  | DERL2    | 0.19  | TargetScan Human         | High (predicted)                             |
| hsa-miR-        | -0.62  | FBXL5    | 0.227 | TargetScan Human         | High (predicted)                             |



|                 |        |         |       |                  |                  |
|-----------------|--------|---------|-------|------------------|------------------|
| 106b-5p         |        |         |       |                  |                  |
| hsa-miR-106b-5p | -0.62  | 43528   | 0.434 | TargetScan Human | High (predicted) |
| hsa-miR-106b-5p | -0.62  | RPS15A  | 0.33  | TargetScan Human | High (predicted) |
| hsa-miR-106b-5p | -0.62  | TIMM17A | 0.384 | TargetScan Human | High (predicted) |
| hsa-miR-190a-5p | -0.573 | ARPC5   | 0.25  | TargetScan Human | High (predicted) |
| hsa-miR-190a-5p | -0.573 | GYG1    | 0.28  | TargetScan Human | High (predicted) |
| hsa-miR-190a-5p | -0.573 | TOMM5   | 0.363 | TargetScan Human | High (predicted) |
| hsa-miR-192-3p  | -0.503 | ALG8    | 0.28  | TargetScan Human | High (predicted) |
| hsa-miR-192-3p  | -0.503 | MS4A4A  | 0.472 | TargetScan Human | High (predicted) |
| hsa-miR-192-3p  | -0.503 | RANGRF  | 0.229 | TargetScan Human | High (predicted) |
| hsa-miR-192-3p  | -0.503 | TMED2   | 0.236 | TargetScan Human | High (predicted) |
| hsa-miR-192-3p  | -0.503 | TMEM187 | 0.355 | TargetScan Human | High (predicted) |
| hsa-miR-192-3p  | -0.503 | ZNF627  | 0.203 | TargetScan Human | High (predicted) |
| hsa-miR-193b-3p | -0.537 | AIMP2   | 0.289 | TargetScan Human | High (predicted) |
| hsa-miR-193b-3p | -0.537 | ARFIP1  | 0.168 | TargetScan Human | High (predicted) |
| hsa-miR-193b-3p | -0.537 | ARPC5   | 0.25  | TargetScan Human | High (predicted) |

|                 |        |          |       |                  |                  |
|-----------------|--------|----------|-------|------------------|------------------|
| hsa-miR-193b-3p | -0.537 | COX7C    | 0.296 | TargetScan Human | High (predicted) |
| hsa-miR-193b-3p | -0.537 | HIST1H4I | 0.322 | TargetScan Human | High (predicted) |
| hsa-miR-193b-3p | -0.537 | LYRM2    | 0.208 | TargetScan Human | High (predicted) |
| hsa-miR-193b-3p | -0.537 | NME1     | 0.491 | TargetScan Human | High (predicted) |
| hsa-miR-193b-3p | -0.537 | NSF      | 0.238 | TargetScan Human | High (predicted) |
| hsa-miR-193b-3p | -0.537 | RNF146   | 0.156 | TargetScan Human | High (predicted) |
| hsa-miR-193b-3p | -0.537 | RPS21    | 0.38  | TargetScan Human | High (predicted) |
| hsa-miR-193b-3p | -0.537 | RTN4IP1  | 0.345 | TargetScan Human | High (predicted) |
| hsa-miR-193b-3p | -0.537 | TWISTNB  | 0.212 | TargetScan Human | High (predicted) |
| hsa-miR-193b-3p | -0.537 | ZBTB6    | 0.232 | TargetScan Human | High (predicted) |
| hsa-miR-199b-5p | -0.588 | FABP2    | 0.528 | TargetScan Human | High (predicted) |
| hsa-miR-199b-5p | -0.588 | FLRT3    | 0.352 | TargetScan Human | High (predicted) |
| hsa-miR-199b-5p | -0.588 | JKAMP    | 0.238 | TargetScan Human | High (predicted) |
| hsa-miR-199b-5p | -0.588 | MAGT1    | 0.204 | TargetScan Human | High (predicted) |
| hsa-miR-199b-5p | -0.588 | NUDT5    | 0.217 | TargetScan Human | High (predicted) |
| hsa-            | -0.588 | SCGN     | 0.527 | TargetScan       | High (predicted) |

|                 |        |                         |        |                  |                         |
|-----------------|--------|-------------------------|--------|------------------|-------------------------|
| miR-199b-5p     |        |                         |        | Human            |                         |
| hsa-miR-199b-5p | -0.588 | TSPAN6                  | 0.392  | TargetScan Human | High (predicted)        |
| hsa-miR-199b-5p | -0.588 | TXNDC12                 | 0.208  | TargetScan Human | High (predicted)        |
| hsa-miR-199b-5p | -0.588 | ZNF627                  | 0.203  | TargetScan Human | High (predicted)        |
| hsa-miR-204-3p  | 0.627  | GPATCH8                 | -0.181 | TargetScan Human | High (predicted)        |
| hsa-miR-204-3p  | 0.627  | ICOSLG/<br>LOC102723996 | -0.298 | TargetScan Human | High (predicted)        |
| hsa-miR-204-3p  | 0.627  | LRRN4                   | -0.437 | TargetScan Human | High (predicted)        |
| hsa-miR-204-3p  | 0.627  | RBM33                   | -0.148 | TargetScan Human | High (predicted)        |
| hsa-miR-204-3p  | 0.627  | SLX4                    | -0.279 | TargetScan Human | High (predicted)        |
| hsa-miR-204-3p  | 0.627  | SYNJ2                   | -0.184 | TargetScan Human | High (predicted)        |
| hsa-miR-204-5p  | 0.7    | CASTOR3                 | -0.263 | TargetScan Human | High (predicted)        |
| hsa-miR-204-5p  | 0.7    | ITGB4                   | -0.383 | miRecords        | Experimentally Observed |
| hsa-miR-204-5p  | 0.7    | TLX2                    | -0.497 | TargetScan Human | High (predicted)        |
| hsa-miR-204-5p  | 0.7    | TTYH1                   | -0.336 | TargetScan Human | High (predicted)        |
| hsa-miR-29c-3p  | -0.527 | AIMP2                   | 0.289  | TargetScan Human | High (predicted)        |
| hsa-miR-        | -0.527 | COMMD2                  | 0.202  | TargetScan Human | High (predicted)        |

|                |        |           |       |                                    |                                          |
|----------------|--------|-----------|-------|------------------------------------|------------------------------------------|
| 29c-3p         |        |           |       |                                    |                                          |
| hsa-miR-29c-3p | -0.527 | CREG1     | 0.219 | TargetScan Human                   | High (predicted)                         |
| hsa-miR-29c-3p | -0.527 | CYCS      | 0.41  | TargetScan Human                   | High (predicted)                         |
| hsa-miR-29c-3p | -0.527 | GEMIN2    | 0.246 | TargetScan Human                   | High (predicted)                         |
| hsa-miR-29c-3p | -0.527 | GMFB      | 0.221 | Ingenuity Expert Findings          | Experimentally Observed                  |
| hsa-miR-29c-3p | -0.527 | IFI30     | 0.394 | TargetScan Human                   | High (predicted)                         |
| hsa-miR-29c-3p | -0.527 | MFAP3     | 0.151 | TargetScan Human                   | High (predicted)                         |
| hsa-miR-29c-3p | -0.527 | NIPSNAP3A | 0.185 | TargetScan Human                   | High (predicted)                         |
| hsa-miR-29c-3p | -0.527 | NPM3      | 0.364 | TargetScan Human                   | High (predicted)                         |
| hsa-miR-29c-3p | -0.527 | OSTC      | 0.362 | TargetScan Human                   | High (predicted)                         |
| hsa-miR-29c-3p | -0.527 | RAB30     | 0.598 | TargetScan Human                   | High (predicted)                         |
| hsa-miR-29c-3p | -0.527 | SLC16A14  | 0.545 | TargetScan Human                   | High (predicted)                         |
| hsa-miR-29c-3p | -0.527 | TDG       | 0.175 | TarBase,TargetScan Human,miRecords | Experimentally Observed,High (predicted) |
| hsa-miR-29c-3p | -0.527 | TIMM8B    | 0.388 | TargetScan Human                   | High (predicted)                         |
| hsa-miR-29c-3p | -0.527 | TMEM141   | 0.34  | TargetScan Human                   | High (predicted)                         |
| hsa-miR-29c-3p | -0.527 | TMEM183A  | 0.149 | TargetScan Human                   | High (predicted)                         |

|                |        |         |       |                          |                                              |
|----------------|--------|---------|-------|--------------------------|----------------------------------------------|
| hsa-miR-29c-3p | -0.527 | UQCR11  | 0.347 | TargetScan Human         | High (predicted)                             |
| hsa-miR-30b-5p | -0.738 | ANKRA2  | 0.208 | TargetScan Human         | High (predicted)                             |
| hsa-miR-30b-5p | -0.738 | ARL4A   | 0.508 | TargetScan Human         | High (predicted)                             |
| hsa-miR-30b-5p | -0.738 | CFDP1   | 0.228 | TargetScan Human         | High (predicted)                             |
| hsa-miR-30b-5p | -0.738 | EED     | 0.147 | TargetScan Human         | High (predicted)                             |
| hsa-miR-30b-5p | -0.738 | IDH1    | 0.257 | TarBase,TargetScan Human | Experimentally Observed,High (predicted)     |
| hsa-miR-30b-5p | -0.738 | MPDU1   | 0.289 | TarBase                  | Experimentally Observed                      |
| hsa-miR-30b-5p | -0.738 | NCEH1   | 0.294 | TarBase,TargetScan Human | Experimentally Observed,Moderate (predicted) |
| hsa-miR-30b-5p | -0.738 | NECAP1  | 0.188 | TargetScan Human         | High (predicted)                             |
| hsa-miR-30b-5p | -0.738 | SRSF7   | 0.319 | TargetScan Human         | High (predicted)                             |
| hsa-miR-30b-5p | -0.738 | STX1A   | 0.484 | miRecords                | Experimentally Observed                      |
| hsa-miR-30b-5p | -0.738 | SYPL1   | 0.174 | TarBase                  | Experimentally Observed                      |
| hsa-miR-30b-5p | -0.738 | TMED10  | 0.181 | TarBase,TargetScan Human | Experimentally Observed,Moderate (predicted) |
| hsa-miR-30b-5p | -0.738 | TMED2   | 0.236 | TarBase,TargetScan Human | Experimentally Observed,Moderate (predicted) |
| hsa-miR-30b-5p | -0.738 | TMEM59  | 0.216 | TarBase                  | Experimentally Observed                      |
| hsa-           | -0.738 | TMEM87A | 0.189 | TarBase,TargetScan       | Experimentally                               |

|                |        |          |       |                  |                               |
|----------------|--------|----------|-------|------------------|-------------------------------|
| miR-30b-5p     |        |          |       | n Human          | Observed,Moderate (predicted) |
| hsa-miR-30b-5p | -0.738 | UAP1     | 0.182 | TarBase          | Experimentally Observed       |
| hsa-miR-31-3p  | -0.726 | C19orf12 | 0.301 | TargetScan Human | High (predicted)              |
| hsa-miR-31-3p  | -0.726 | DIRAS3   | 0.491 | TargetScan Human | High (predicted)              |
| hsa-miR-31-3p  | -0.726 | ELOC     | 0.228 | TargetScan Human | High (predicted)              |
| hsa-miR-31-3p  | -0.726 | MRPS16   | 0.227 | TargetScan Human | High (predicted)              |
| hsa-miR-31-3p  | -0.726 | MTPN     | 0.163 | TargetScan Human | High (predicted)              |
| hsa-miR-31-3p  | -0.726 | RBM8A    | 0.175 | TargetScan Human | High (predicted)              |
| hsa-miR-31-3p  | -0.726 | TMEM107  | 0.85  | TargetScan Human | High (predicted)              |
| hsa-miR-324-5p | -0.523 | ACTRT3   | 0.423 | TargetScan Human | High (predicted)              |
| hsa-miR-324-5p | -0.523 | IL17D    | 0.396 | TargetScan Human | High (predicted)              |
| hsa-miR-324-5p | -0.523 | PANK1    | 0.323 | TargetScan Human | High (predicted)              |
| hsa-miR-324-5p | -0.523 | POLR2C   | 0.205 | TargetScan Human | High (predicted)              |
| hsa-miR-324-5p | -0.523 | RPA2     | 0.256 | TargetScan Human | High (predicted)              |
| hsa-miR-324-5p | -0.523 | SRP9     | 0.23  | TargetScan Human | High (predicted)              |
| hsa-miR-       | -0.523 | TMEM135  | 0.322 | TargetScan Human | High (predicted)              |

|                |        |                |       |                  |                  |
|----------------|--------|----------------|-------|------------------|------------------|
| 324-5p         |        |                |       |                  |                  |
| hsa-miR-324-5p | -0.523 | TMEM141        | 0.34  | TargetScan Human | High (predicted) |
| hsa-miR-34c-5p | -0.539 | C12orf57       | 0.391 | TargetScan Human | High (predicted) |
| hsa-miR-34c-5p | -0.539 | COMMD9         | 0.178 | TargetScan Human | High (predicted) |
| hsa-miR-34c-5p | -0.539 | GCH1           | 0.433 | TargetScan Human | High (predicted) |
| hsa-miR-34c-5p | -0.539 | GLRX5          | 0.417 | TargetScan Human | High (predicted) |
| hsa-miR-34c-5p | -0.539 | HIST1H4H       | 0.45  | TargetScan Human | High (predicted) |
| hsa-miR-34c-5p | -0.539 | HNRNPA1        | 0.19  | TargetScan Human | High (predicted) |
| hsa-miR-34c-5p | -0.539 | KCNK3          | 0.318 | TargetScan Human | High (predicted) |
| hsa-miR-34c-5p | -0.539 | NCEH1          | 0.294 | TargetScan Human | High (predicted) |
| hsa-miR-34c-5p | -0.539 | PPP1R14D       | 0.397 | TargetScan Human | High (predicted) |
| hsa-miR-34c-5p | -0.539 | RAP1GDS1       | 0.214 | TargetScan Human | High (predicted) |
| hsa-miR-34c-5p | -0.539 | RDH11          | 0.4   | TargetScan Human | High (predicted) |
| hsa-miR-34c-5p | -0.539 | RPL36A-HNRNPH2 | 0.269 | TargetScan Human | High (predicted) |
| hsa-miR-34c-5p | -0.539 | SMIM30         | 0.25  | TargetScan Human | High (predicted) |
| hsa-miR-34c-5p | -0.539 | STX1A          | 0.484 | TargetScan Human | High (predicted) |

|                 |        |            |       |                  |                  |
|-----------------|--------|------------|-------|------------------|------------------|
| hsa-miR-34c-5p  | -0.539 | TMEM126B   | 0.301 | TargetScan Human | High (predicted) |
| hsa-miR-34c-5p  | -0.539 | TMEM141    | 0.34  | TargetScan Human | High (predicted) |
| hsa-miR-34c-5p  | -0.539 | TSN        | 0.202 | TargetScan Human | High (predicted) |
| hsa-miR-34c-5p  | -0.539 | XBP1       | 0.354 | TargetScan Human | High (predicted) |
| hsa-miR-34c-5p  | -0.539 | ZCCHC17    | 0.199 | TargetScan Human | High (predicted) |
| hsa-miR-369-3p  | -0.556 | GPN3       | 0.262 | TargetScan Human | High (predicted) |
| hsa-miR-374b-3p | -0.529 | EMC4       | 0.255 | TargetScan Human | High (predicted) |
| hsa-miR-374b-3p | -0.529 | HSPE1-MOB4 | 0.254 | TargetScan Human | High (predicted) |
| hsa-miR-374b-3p | -0.529 | LCN2       | 1.276 | TargetScan Human | High (predicted) |
| hsa-miR-374b-3p | -0.529 | MOB4       | 0.184 | TargetScan Human | High (predicted) |
| hsa-miR-374b-3p | -0.529 | TMEM70     | 0.377 | TargetScan Human | High (predicted) |
| hsa-miR-374b-3p | -0.529 | TSG101     | 0.191 | TargetScan Human | High (predicted) |
| hsa-miR-378e    | -0.599 | GOLT1A     | 0.477 | TargetScan Human | High (predicted) |
| hsa-miR-378e    | -0.599 | GPN1       | 0.184 | TargetScan Human | High (predicted) |
| hsa-miR-378e    | -0.599 | GZMB       | 0.692 | TargetScan Human | High (predicted) |
| hsa-            | -0.599 | HNRNPA1    | 0.19  | TargetScan       | High (predicted) |



|                |        |         |       |                  |                  |
|----------------|--------|---------|-------|------------------|------------------|
| miR-378e       |        |         |       | Human            |                  |
| hsa-miR-378e   | -0.599 | KBTBD7  | 0.209 | TargetScan Human | High (predicted) |
| hsa-miR-378e   | -0.599 | MROH8   | 0.268 | TargetScan Human | High (predicted) |
| hsa-miR-378e   | -0.599 | PSMA1   | 0.217 | TargetScan Human | High (predicted) |
| hsa-miR-378e   | -0.599 | PTGES3  | 0.187 | TargetScan Human | High (predicted) |
| hsa-miR-378e   | -0.599 | RBX1    | 0.288 | TargetScan Human | High (predicted) |
| hsa-miR-378e   | -0.599 | RPN2    | 0.251 | TargetScan Human | High (predicted) |
| hsa-miR-378e   | -0.599 | TRIAP1  | 0.263 | TargetScan Human | High (predicted) |
| hsa-miR-451a   | -0.619 | ATP5F1E | 0.324 | TargetScan Human | High (predicted) |
| hsa-miR-451a   | -0.619 | PSMB8   | 0.357 | TargetScan Human | High (predicted) |
| hsa-miR-582-5p | -0.728 | CXCL2   | 0.708 | TargetScan Human | High (predicted) |
| hsa-miR-582-5p | -0.728 | HNRNPA1 | 0.19  | TargetScan Human | High (predicted) |
| hsa-miR-582-5p | -0.728 | PBK     | 0.419 | TargetScan Human | High (predicted) |
| hsa-miR-582-5p | -0.728 | PPIH    | 0.214 | TargetScan Human | High (predicted) |
| hsa-miR-582-5p | -0.728 | TIMM23  | 0.217 | TargetScan Human | High (predicted) |
| hsa-miR-       | -0.728 | UQCRH   | 0.337 | TargetScan Human | High (predicted) |

|                |        |             |        |                  |                  |
|----------------|--------|-------------|--------|------------------|------------------|
| 582-5p         |        |             |        |                  |                  |
| hsa-miR-582-5p | -0.728 | ZNF627      | 0.203  | TargetScan Human | High (predicted) |
| hsa-miR-671-3p | 0.515  | FOXP2       | -0.323 | TargetScan Human | High (predicted) |
| hsa-miR-671-3p | 0.515  | IGF2BP2-AS1 | -0.414 | TargetScan Human | High (predicted) |
| hsa-miR-671-3p | 0.515  | PRRC2B      | -0.161 | TargetScan Human | High (predicted) |
| hsa-miR-671-3p | 0.515  | SLC7A8      | -0.256 | TargetScan Human | High (predicted) |
| hsa-miR-671-3p | 0.515  | VMAC        | -0.318 | TargetScan Human | High (predicted) |
| hsa-miR-7974   | 0.708  | ASB14       | -0.304 | TargetScan Human | High (predicted) |
| hsa-miR-7974   | 0.708  | ATXN2       | -0.176 | TargetScan Human | High (predicted) |
| hsa-miR-7974   | 0.708  | C11orf49    | -0.173 | TargetScan Human | High (predicted) |
| hsa-miR-7974   | 0.708  | CYP4F3      | -0.472 | TargetScan Human | High (predicted) |
| hsa-miR-7974   | 0.708  | FAM222B     | -0.222 | TargetScan Human | High (predicted) |
| hsa-miR-7974   | 0.708  | IGFBP4      | -0.427 | TargetScan Human | High (predicted) |
| hsa-miR-7974   | 0.708  | KIAA1211L   | -0.226 | TargetScan Human | High (predicted) |
| hsa-miR-7974   | 0.708  | MT-ND4L     | -1.086 | TargetScan Human | High (predicted) |
| hsa-miR-7974   | 0.708  | PARD3B      | -0.143 | TargetScan Human | High (predicted) |

|              |       |        |        |                     |                  |
|--------------|-------|--------|--------|---------------------|------------------|
| hsa-miR-7974 | 0.708 | PLEC   | -0.456 | TargetScan<br>Human | High (predicted) |
| hsa-miR-7974 | 0.708 | PPP5D1 | -0.366 | TargetScan<br>Human | High (predicted) |
| hsa-miR-7974 | 0.708 | SEMA4G | -0.344 | TargetScan<br>Human | High (predicted) |
| hsa-miR-7974 | 0.708 | SOX13  | -0.283 | TargetScan<br>Human | High (predicted) |

Abbreviations: FC, fold change

**Supplementary Table 8. AME analysis – 118 motifs enriched in promoters of differentially expressed genes**

| Rank | motif_ID | motif_alt_ID | consensus             | p-value  | adj_p-value | E-value  | tests | FAST A max | pos  | neg  | PWM min | TP   | %TP   | FP  | %FP   |
|------|----------|--------------|-----------------------|----------|-------------|----------|-------|------------|------|------|---------|------|-------|-----|-------|
| 1    | MA0516.1 | SP2          | GYCCCGCCYCYBSSS       | 1.63E-67 | 3.12E-64    | 5.65E-61 | 1915  | 3139       | 3139 | 3139 | 3.35    | 976  | 31.09 | 412 | 13.13 |
| 2    | MA0079.3 | SP1          | GCCCCCKCCCCC          | 1.92E-66 | 3.86E-63    | 6.97E-60 | 2005  | 3139       | 3139 | 3139 | 6.92    | 862  | 27.46 | 334 | 10.64 |
| 3    | MA0599.1 | KLF5         | GCCCCDCCCH            | 1.53E-49 | 2.80E-46    | 5.06E-43 | 1832  | 3139       | 3139 | 3139 | 1.38    | 1113 | 35.46 | 595 | 18.96 |
| 4    | MA0746.1 | SP3          | VCCACGCCCMC           | 2.04E-41 | 4.14E-38    | 7.48E-35 | 2026  | 3139       | 3139 | 3139 | 3.24    | 689  | 21.95 | 304 | 9.68  |
| 5    | MA0528.1 | ZNF263       | GGAGGAGGRRRGRGRRGRRGR | 1.17E-34 | 1.58E-31    | 2.86E-28 | 1351  | 3139       | 3139 | 3139 | 2.98    | 691  | 22.01 | 335 | 10.67 |
| 6    | MA0136.2 | ELF5         | AMSMGGAAGTD           | 1.20E-33 | 1.82E-30    | 3.29E-27 | 1516  | 3139       | 3139 | 3139 | 2.1     | 678  | 21.6  | 330 | 10.51 |
| 7    | MA0076.2 | ELK4         | BCRCTTCCGGB           | 1.04E-32 | 1.08E-29    | 1.96E-26 | 1038  | 3139       | 3139 | 3139 | 11.8    | 274  | 8.73  | 67  | 2.13  |
| 8    | MA0685.1 | SP4          | BWRGCCACGCCCMCTYH     | 3.67E-31 | 1.10E-28    | 1.98E-25 | 299   | 3139       | 3139 | 3139 | 1.24    | 244  | 7.77  | 55  | 1.75  |
| 9    | MA0095.2 | YY1          | CAARATGGCBGC          | 6.58E-31 | 3.79E-28    | 6.85E-25 | 576   | 3139       | 3139 | 3139 | 3.6     | 302  | 9.62  | 87  | 2.77  |
| 10   | MA0028.2 | ELK1         | ACCGGAAGTR            | 2.90E-30 | 1.36E-27    | 2.47E-24 | 471   | 3139       | 3139 | 3139 | 1.3     | 333  | 10.61 | 107 | 3.41  |
| 11   | MA0741.1 | KLF16        | GMCACGCCCCC           | 1.75E-30 | 2.45E-27    | 4.43E-24 | 1398  | 3139       | 3139 | 3139 | 17      | 284  | 9.05  | 78  | 2.48  |
| 12   | MA0062.2 | Gabpa        | CCGGAAGTGVV           | 8.92E-30 | 7.98E-27    | 1.44E-23 | 895   | 3139       | 3139 | 3139 | 9.95    | 268  | 8.54  | 71  | 2.26  |
| 13   | MA0474.2 | ERG          | ACCGGAARTV            | 1.01E-29 | 8.66E-27    | 1.57E-23 | 854   | 3139       | 3139 | 3139 | 4.81    | 275  | 8.76  | 75  | 2.39  |
| 14   | MA0475.2 | FLI1         | ACCGGAARTR            | 2.41E-29 | 1.50E-26    | 2.72E-23 | 624   | 3139       | 3139 | 3139 | 2.4     | 320  | 10.19 | 102 | 3.25  |
| 15   | MA0759.1 | ELK3         | ACCGGAAGTD            | 2.33E-29 | 1.89E-26    | 3.41E-23 | 810   | 3139       | 3139 | 3139 | 4.99    | 255  | 8.12  | 65  | 2.07  |
| 16   | MA0098.3 | ETS1         | ACCGGAARTR            | 2.38E-29 | 2.15E-26    | 3.89E-23 | 902   | 3139       | 3139 | 3139 | 3.24    | 348  | 11.09 | 119 | 3.79  |
| 17   | MA0764.1 | ETV4         | ACCGGAAGTR            | 3.74E-29 | 3.92E-26    | 7.09E-23 | 1049  | 3139       | 3139 | 3139 | 3.89    | 314  | 10    | 99  | 3.15  |
| 18   | MA0765.1 | ETV5         | ACCGGAWGYN            | 3.79E-29 | 4.54E-26    | 8.20E-23 | 1198  | 3139       | 3139 | 3139 | 5.76    | 237  | 7.55  | 56  | 1.78  |
| 19   | MA0750.2 | ZBTB7A       | NVCCGGAAGTGSV         | 6.88E-29 | 8.91E-26    | 1.61E-22 | 1295  | 3139       | 3139 | 3139 | 6.23    | 326  | 10.39 | 107 | 3.41  |
| 20   | MA0761.1 | ETV1         | ACCGGAAGTD            | 1.47E-28 | 1.42E-25    | 2.56E-22 | 963   | 3139       | 3139 | 3139 | 3.57    | 321  | 10.23 | 105 | 3.35  |
| 21   | MA0760.1 | ERF          | ACCGGAAGTR            | 3.17E-28 | 1.99E-25    | 3.59E-22 | 627   | 3139       | 3139 | 3139 | 3.09    | 282  | 8.98  | 83  | 2.64  |
| 22   | MA0156.2 | FEV          | ACCGGAAGTN            | 7.18E-28 | 6.10E-25    | 1.10E-21 | 849   | 3139       | 3139 | 3139 | 3       | 337  | 10.74 | 117 | 3.73  |

|    |          |                   |                       |          |          |          |      |      |      |      |      |     |       |     |       |
|----|----------|-------------------|-----------------------|----------|----------|----------|------|------|------|------|------|-----|-------|-----|-------|
| 23 | MA0641.1 | ELF4              | AACCCGGAAGTR          | 1.38E-26 | 4.76E-24 | 8.61E-21 | 346  | 3139 | 3139 | 3139 | 1.13 | 267 | 8.51  | 79  | 2.52  |
| 24 | MA0645.1 | ETV6              | MSCGGAAGTR            | 8.31E-27 | 8.33E-24 | 1.51E-20 | 1002 | 3139 | 3139 | 3139 | 3.69 | 372 | 11.85 | 143 | 4.56  |
| 25 | MA1125.1 | ZNF384            | DNWMAAAAAAAAA         | 1.20E-26 | 1.13E-23 | 2.04E-20 | 938  | 3139 | 3139 | 3139 | 1810 | 123 | 3.92  | 10  | 0.32  |
| 26 | MA0763.1 | ETV3              | ACCGGAAGTR            | 1.67E-26 | 1.26E-23 | 2.27E-20 | 753  | 3139 | 3139 | 3139 | 6.13 | 225 | 7.17  | 56  | 1.78  |
| 27 | MA0740.1 | KLF14             | KRCCACGCCCMCYT        | 4.52E-26 | 2.47E-23 | 4.46E-20 | 546  | 3139 | 3139 | 3139 | 1.15 | 383 | 12.2  | 153 | 4.87  |
| 28 | MA0598.2 | EHF               | WACCCGGAAGTA          | 1.46E-25 | 7.34E-23 | 1.33E-19 | 502  | 3139 | 3139 | 3139 | 1.21 | 345 | 10.99 | 130 | 4.14  |
| 29 | MA0473.2 | ELF1              | AACCCGGAAGTR          | 2.10E-25 | 7.81E-23 | 1.41E-19 | 371  | 3139 | 3139 | 3139 | 1.29 | 268 | 8.54  | 83  | 2.64  |
| 30 | MA0747.1 | SP8               | RCCACGCCCMCY          | 6.82E-26 | 1.02E-22 | 1.84E-19 | 1493 | 3139 | 3139 | 3139 | 1.79 | 721 | 22.97 | 404 | 12.87 |
| 31 | MA0506.1 | NRF1              | GCGCVTGCGR            | 3.52E-25 | 3.23E-22 | 5.83E-19 | 917  | 3139 | 3139 | 3139 | 75.7 | 134 | 4.27  | 16  | 0.51  |
| 32 | MA0640.1 | ELF3              | WACCCGGAAGTAR         | 1.78E-23 | 4.52E-21 | 8.17E-18 | 254  | 3139 | 3139 | 3139 | 1.26 | 194 | 6.18  | 47  | 1.5   |
| 33 | MA0041.1 | Foxd3             | GWWTGTTDTTT           | 3.07E-23 | 3.13E-20 | 5.66E-17 | 1021 | 3139 | 3139 | 3139 | 7.6  | 397 | 12.65 | 174 | 5.54  |
| 34 | MA0050.2 | IRF1              | NTTYASTTTCACCTTCDBTTT | 2.23E-20 | 1.30E-17 | 2.34E-14 | 580  | 3139 | 3139 | 3139 | 4.52 | 303 | 9.65  | 122 | 3.89  |
| 35 | MA1107.1 | KLF9              | VSCCACCACCH           | 2.02E-20 | 1.84E-17 | 3.32E-14 | 908  | 3139 | 3139 | 3139 | 1.21 | 547 | 17.43 | 299 | 9.53  |
| 36 | MA0748.1 | YY2               | RWCCGCCATTW           | 2.25E-19 | 1.42E-16 | 2.57E-13 | 632  | 3139 | 3139 | 3139 | 2.54 | 254 | 8.09  | 94  | 2.99  |
| 37 | MA0018.3 | CREB1             | NVTGACGTCABN          | 1.46E-18 | 7.12E-16 | 1.29E-12 | 488  | 3139 | 3139 | 3139 | 1.66 | 271 | 8.63  | 108 | 3.44  |
| 38 | MA0493.1 | Klf1              | RRCCACACCCW           | 1.01E-16 | 9.26E-16 | 1.67E-12 | 920  | 3139 | 3139 | 3139 | 1.07 | 577 | 18.38 | 333 | 10.61 |
| 39 | MA0604.1 | Atf1              | RTGACGTA              | 5.58E-18 | 2.67E-15 | 4.83E-12 | 479  | 3139 | 3139 | 3139 | 3.97 | 168 | 5.35  | 47  | 1.5   |
| 40 | MA1133.1 | JUN::JUNB (var.2) | KRTGACGTCATN          | 7.57E-18 | 4.05E-15 | 7.33E-12 | 535  | 3139 | 3139 | 3139 | 5.88 | 125 | 3.98  | 25  | 0.8   |
| 41 | MA0497.1 | MEF2C             | DDDCYAAAAATAGMW       | 1.45E-17 | 1.24E-14 | 2.25E-11 | 859  | 3139 | 3139 | 3139 | 6.81 | 315 | 10.04 | 142 | 4.52  |
| 42 | MA0686.1 | SPDEF             | AMCCGGATGTR           | 5.35E-17 | 1.59E-14 | 2.87E-11 | 297  | 3139 | 3139 | 3139 | 1.12 | 212 | 6.75  | 76  | 2.42  |
| 43 | MA0834.1 | ATF7              | NDATGACGTCATMV        | 3.23E-16 | 2.84E-14 | 5.13E-11 | 88   | 3139 | 3139 | 3139 | 1.22 | 76  | 2.42  | 7   | 0.22  |
| 44 | MA0502.1 | NFYB              | VMMYBRCCAATCAG        | 6.87E-17 | 3.09E-14 | 5.59E-11 | 450  | 3139 | 3139 | 3139 | 4.51 | 213 | 6.79  | 77  | 2.45  |
| 45 | MA0032.2 | FOXC1             | WAWGTAAAYAW           | 3.94E-17 | 4.30E-14 | 7.77E-11 | 1090 | 3139 | 3139 | 3139 | 1.08 | 669 | 21.31 | 419 | 13.35 |
| 46 | MA0108.2 | TBP               | STATAAAWRSVVBN        | 6.06E-17 | 6.80E-14 | 1.23E-10 | 1122 | 3139 | 3139 | 3139 | 2.19 | 497 | 15.83 | 281 | 8.95  |

|    |          |                     |                  |          |          |          |      |      |      |      |          |      |       |     |       |
|----|----------|---------------------|------------------|----------|----------|----------|------|------|------|------|----------|------|-------|-----|-------|
| 47 | MA0846.1 | FOXC2               | WAWGTAAACAWW     | 1.46E-16 | 1.75E-13 | 3.16E-10 | 1199 | 3139 | 3139 | 3139 | 1.81     | 601  | 19.15 | 367 | 11.69 |
| 48 | MA1129.1 | FOSL1::JUN (var.2)  | ATGACGTCAT       | 6.18E-16 | 3.49E-13 | 6.31E-10 | 565  | 3139 | 3139 | 3139 | 1.07     | 373  | 11.88 | 192 | 6.12  |
| 49 | MA1136.1 | FOSB::JUNB (var.2)  | RTGACGTCAT       | 8.99E-16 | 4.24E-13 | 7.67E-10 | 472  | 3139 | 3139 | 3139 | 1.76     | 233  | 7.42  | 94  | 2.99  |
| 50 | MA1122.1 | TFDP1               | VSGCGGGAAVN      | 3.41E-16 | 4.70E-13 | 8.49E-10 | 1377 | 3139 | 3139 | 3139 | 1.3      | 701  | 22.33 | 453 | 14.43 |
| 51 | MA0847.1 | FOXD2               | GTAAACA          | 5.48E-16 | 9.23E-13 | 1.67E-09 | 1685 | 3139 | 3139 | 3139 | 4.09     | 349  | 11.12 | 174 | 5.54  |
| 52 | MA0762.1 | ETV2                | AACCGGAAATR      | 2.71E-15 | 1.11E-12 | 2.00E-09 | 408  | 3139 | 3139 | 3139 | 1.08     | 280  | 8.92  | 128 | 4.08  |
| 53 | MA1145.1 | FOSL2::JUND (var.2) | NNRTGACGTCAHNSN  | 4.36E-15 | 1.53E-12 | 2.76E-09 | 350  | 3139 | 3139 | 3139 | 4.53     | 132  | 4.21  | 35  | 1.12  |
| 54 | MA1131.1 | FOSL2::JUN (var.2)  | GRTGACGTMAT      | 1.04E-14 | 3.84E-12 | 6.94E-09 | 368  | 3139 | 3139 | 3139 | 11       | 90   | 2.87  | 15  | 0.48  |
| 55 | MA0850.1 | FOXP3               | RTAAACA          | 2.86E-15 | 4.63E-12 | 8.37E-09 | 1619 | 3139 | 3139 | 3139 | 5.03     | 264  | 8.41  | 117 | 3.73  |
| 56 | MA1139.1 | FOSL2::JUNB (var.2) | DATGACGTCATH     | 1.96E-14 | 5.73E-12 | 1.04E-08 | 293  | 3139 | 3139 | 3139 | 3.35     | 127  | 4.05  | 34  | 1.08  |
| 57 | MA1140.1 | JUNB(var.2)         | RTGACGTCAH       | 9.34E-15 | 6.62E-12 | 1.20E-08 | 709  | 3139 | 3139 | 3139 | 1.07E+00 | 441  | 14.05 | 251 | 8     |
| 58 | MA1127.1 | FOSB::JUN           | GATGACGTCAT      | 1.73E-14 | 6.74E-12 | 1.22E-08 | 389  | 3139 | 3139 | 3139 | 5.82     | 114  | 3.63  | 27  | 0.86  |
| 59 | MA0656.1 | JDP2(var.2)         | GATGACGTCAH      | 1.03E-13 | 8.10E-12 | 1.47E-08 | 79   | 3139 | 3139 | 3139 | 2.35     | 61   | 1.94  | 5   | 0.16  |
| 60 | MA0033.2 | FOXL1               | RTAAACA          | 1.45E-14 | 1.39E-11 | 2.51E-08 | 957  | 3139 | 3139 | 3139 | 9.1      | 268  | 8.54  | 123 | 3.92  |
| 61 | MA0845.1 | FOXB1               | WATGTAAATAT      | 4.34E-14 | 3.88E-11 | 7.01E-08 | 894  | 3139 | 3139 | 3139 | 3.88     | 308  | 9.81  | 154 | 4.91  |
| 62 | MA0593.1 | FOXP2               | RWGTAAACAVR      | 9.15E-14 | 4.76E-11 | 8.60E-08 | 520  | 3139 | 3139 | 3139 | 4.94     | 244  | 7.77  | 110 | 3.5   |
| 63 | MA0840.1 | Creb5               | NATGACGTCAH      | 6.91E-13 | 7.47E-11 | 1.35E-07 | 108  | 3139 | 3139 | 3139 | 9        | 55   | 1.75  | 4   | 0.13  |
| 64 | MA0848.1 | FOXO4               | GTAAACA          | 8.01E-14 | 7.68E-11 | 1.39E-07 | 959  | 3139 | 3139 | 3139 | 3.52     | 321  | 10.23 | 165 | 5.26  |
| 65 | MA0081.1 | SPIB                | WGMGGAA          | 5.78E-14 | 1.25E-10 | 2.25E-07 | 2156 | 3139 | 3139 | 3139 | 2        | 882  | 28.1  | 630 | 20.07 |
| 66 | MA0899.1 | HOXA10              | DGYMATAAAAHH     | 1.34E-13 | 2.09E-10 | 3.78E-07 | 1563 | 3139 | 3139 | 3139 | 2.29     | 643  | 20.48 | 425 | 13.54 |
| 67 | MA0609.1 | Crem                | NATGACGTMA       | 9.88E-13 | 2.35E-10 | 4.25E-07 | 238  | 3139 | 3139 | 3139 | 13       | 75   | 2.39  | 12  | 0.38  |
| 68 | MA0152.1 | NFATC2              | TTTTCCA          | 2.45E-13 | 4.74E-10 | 8.56E-07 | 1936 | 3139 | 3139 | 3139 | 1.04     | 1098 | 34.98 | 833 | 26.54 |
| 69 | MA0851.1 | Foxj3               | NDAADGTAAACAAANM | 1.16E-12 | 8.35E-10 | 1.51E-06 | 720  | 3139 | 3139 | 3139 | 1.33     | 427  | 13.6  | 254 | 8.09  |
| 70 | MA0638.1 | CREB3               | VTGCCACGTCAHCR   | 5.65E-12 | 8.59E-10 | 1.55E-06 | 152  | 3139 | 3139 | 3139 | 1.18     | 113  | 3.6   | 33  | 1.05  |

|    |          |                     |                     |          |          |          |      |      |      |      |      |      |       |     |       |
|----|----------|---------------------|---------------------|----------|----------|----------|------|------|------|------|------|------|-------|-----|-------|
| 71 | MA0852.2 | FO XK1              | NRDGTAAACAAGNN      | 9.42E-13 | 9.90E-10 | 1.79E-06 | 1051 | 3139 | 3139 | 3139 | 1.51 | 525  | 16.73 | 333 | 10.61 |
| 72 | MA0073.1 | RREB1               | CCCCMAAMCAMCCMCMMMC | 2.99E-11 | 4.01E-09 | 7.24E-06 | 134  | 3139 | 3139 | 3139 | 1.4  | 104  | 3.31  | 30  | 0.96  |
| 73 | MA1103.1 | FO XK2              | WDGTAAACANV         | 4.59E-12 | 4.84E-09 | 8.75E-06 | 1055 | 3139 | 3139 | 3139 | 3.27 | 326  | 10.39 | 179 | 5.7   |
| 74 | MA0614.1 | Foxj2               | RTAAACAA            | 9.52E-12 | 8.05E-09 | 1.45E-05 | 845  | 3139 | 3139 | 3139 | 4.88 | 258  | 8.22  | 130 | 4.14  |
| 75 | MA1143.1 | FOSL1::JUND (var.2) | RTGACGT MAY         | 1.29E-11 | 1.35E-08 | 2.44E-05 | 1048 | 3139 | 3139 | 3139 | 2.94 | 208  | 6.63  | 95  | 3.03  |
| 76 | MA0481.2 | FOXP1               | NDGTAAACAGNN        | 5.46E-11 | 5.39E-08 | 9.74E-05 | 986  | 3139 | 3139 | 3139 | 1.74 | 451  | 14.37 | 286 | 9.11  |
| 77 | MA0517.1 | STAT1::STAT2        | THAGTTTCRKTTCY      | 9.58E-11 | 5.94E-08 | 1.07E-04 | 620  | 3139 | 3139 | 3139 | 1.27 | 376  | 11.98 | 227 | 7.23  |
| 78 | MA0605.1 | Atf3                | GATGACGT            | 1.06E-10 | 6.12E-08 | 1.11E-04 | 577  | 3139 | 3139 | 3139 | 1.45 | 316  | 10.07 | 180 | 5.73  |
| 79 | MA0862.1 | GMEB2               | TTACGTAA            | 4.02E-10 | 1.26E-07 | 2.28E-04 | 314  | 3139 | 3139 | 3139 | 2.35 | 120  | 3.82  | 43  | 1.37  |
| 80 | MA0471.1 | E2F6                | RGGCGGGARRV         | 1.46E-10 | 1.45E-07 | 2.62E-04 | 992  | 3139 | 3139 | 3139 | 17.1 | 212  | 6.75  | 103 | 3.28  |
| 81 | MA0742.1 | Klf12               | GRCCACGCCWHHWH      | 4.83E-10 | 1.56E-07 | 2.83E-04 | 324  | 3139 | 3139 | 3139 | 1.18 | 211  | 6.72  | 105 | 3.35  |
| 82 | MA0060.3 | NFYA                | RRCCAATCAGM         | 2.28E-10 | 1.67E-07 | 3.03E-04 | 735  | 3139 | 3139 | 3139 | 11.3 | 142  | 4.52  | 56  | 1.78  |
| 83 | MA0913.1 | Hoxd9               | GYAATWAAAW          | 1.15E-10 | 1.87E-07 | 3.39E-04 | 1632 | 3139 | 3139 | 3139 | 1.82 | 741  | 23.61 | 538 | 17.14 |
| 84 | MA0910.1 | Hoxd8               | TAADTAATTAATRGCTN   | 2.73E-10 | 2.50E-07 | 4.51E-04 | 916  | 3139 | 3139 | 3139 | 1.42 | 524  | 16.69 | 353 | 11.25 |
| 85 | MA0606.1 | NFAT5               | NTTTTCCAYN          | 1.45E-10 | 2.75E-07 | 4.98E-04 | 1900 | 3139 | 3139 | 3139 | 1.12 | 1032 | 32.88 | 804 | 25.61 |
| 86 | MA0849.1 | FO XO6              | GTAAACA             | 4.75E-10 | 2.91E-07 | 5.25E-04 | 612  | 3139 | 3139 | 3139 | 1.9  | 282  | 8.98  | 158 | 5.03  |
| 87 | MA1126.1 | FOS::JUN(var.2)     | DRTGACGTCATHNDTN    | 4.29E-10 | 2.96E-07 | 5.35E-04 | 689  | 3139 | 3139 | 3139 | 1.17 | 413  | 13.16 | 262 | 8.35  |
| 88 | MA0042.2 | FO XI1              | GTAAACA             | 5.00E-10 | 3.21E-07 | 5.81E-04 | 643  | 3139 | 3139 | 3139 | 1.22 | 378  | 12.04 | 234 | 7.45  |
| 89 | MA1116.1 | RBPJ                | BVTGGGAANN          | 4.83E-10 | 3.64E-07 | 6.58E-04 | 753  | 3139 | 3139 | 3139 | 12.1 | 211  | 6.72  | 105 | 3.35  |
| 90 | MA0030.1 | FOXF2               | BNAASGTAAACAAD      | 1.45E-09 | 3.86E-07 | 6.98E-04 | 266  | 3139 | 3139 | 3139 | 1.46 | 171  | 5.45  | 79  | 2.52  |
| 91 | MA0052.3 | MEF2A               | KCTAWAAATAGM        | 2.25E-09 | 4.70E-07 | 8.50E-04 | 209  | 3139 | 3139 | 3139 | 10.6 | 82   | 2.61  | 23  | 0.73  |
| 92 | MA0687.1 | SPIC                | HAAAAGVGGGAAGTA     | 7.19E-10 | 5.32E-07 | 9.62E-04 | 740  | 3139 | 3139 | 3139 | 1.25 | 435  | 13.86 | 282 | 8.98  |
| 93 | MA0526.2 | USF2                | NNNGGTCACGTGRYYN    | 2.45E-09 | 5.49E-07 | 9.92E-04 | 224  | 3139 | 3139 | 3139 | 5.37 | 80   | 2.55  | 22  | 0.7   |
| 94 | MA0829.1 | Srebf1 (var.2)      | ATCACGTGAY          | 5.05E-09 | 8.44E-07 | 1.53E-03 | 167  | 3139 | 3139 | 3139 | 2.21 | 89   | 2.84  | 28  | 0.89  |

|     |          |               |                     |          |          |          |      |      |      |      |      |     |       |     |       |
|-----|----------|---------------|---------------------|----------|----------|----------|------|------|------|------|------|-----|-------|-----|-------|
| 95  | MA0047.2 | Foxa2         | TGTTTACWYWGB        | 1.57E-09 | 9.47E-07 | 1.71E-03 | 602  | 3139 | 3139 | 3139 | 1.3  | 346 | 11.02 | 212 | 6.75  |
| 96  | MA0603.1 | Arntl         | NGTCACGTGH          | 2.60E-09 | 9.91E-07 | 1.79E-03 | 381  | 3139 | 3139 | 3139 | 16.2 | 54  | 1.72  | 9   | 0.29  |
| 97  | MA0622.1 | Mlxip         | BCACGTGK            | 6.05E-09 | 1.16E-06 | 2.09E-03 | 191  | 3139 | 3139 | 3139 | 13   | 110 | 3.5   | 41  | 1.31  |
| 98  | MA1100.1 | ASCL1         | VSAGCAGCTGSNN       | 1.38E-09 | 1.25E-06 | 2.25E-03 | 904  | 3139 | 3139 | 3139 | 1.05 | 535 | 17.04 | 369 | 11.76 |
| 99  | MA0601.1 | Arid3b        | ATATTAATWAN         | 1.90E-09 | 2.20E-06 | 3.97E-03 | 1154 | 3139 | 3139 | 3139 | 3.13 | 470 | 14.97 | 315 | 10.04 |
| 100 | MA0692.1 | TFEB          | RYCACGTGAC          | 4.76E-09 | 2.22E-06 | 4.02E-03 | 467  | 3139 | 3139 | 3139 | 36.6 | 38  | 1.21  | 3   | 0.1   |
| 101 | MA0828.1 | SREBF2(var.2) | ATCACGTGAY          | 1.74E-08 | 2.35E-06 | 4.24E-03 | 135  | 3139 | 3139 | 3139 | 2.12 | 81  | 2.58  | 25  | 0.8   |
| 102 | MA0093.2 | USF1          | VYCAYG TGACC        | 7.04E-09 | 2.61E-06 | 4.72E-03 | 371  | 3139 | 3139 | 3139 | 92.2 | 27  | 0.86  | 0   | 0     |
| 103 | MA0835.1 | BATF3         | TGATGACGTCATCA      | 2.30E-07 | 5.06E-06 | 9.14E-03 | 22   | 3139 | 3139 | 3139 | 1.61 | 22  | 0.7   | 0   | 0     |
| 104 | MA0488.1 | JUN           | DDRATGATGTCAT       | 2.22E-08 | 5.70E-06 | 1.03E-02 | 257  | 3139 | 3139 | 3139 | 1.66 | 157 | 5     | 75  | 2.39  |
| 105 | MA0901.1 | HOXB13        | CCAATAAAAH          | 6.75E-09 | 5.99E-06 | 1.08E-02 | 888  | 3139 | 3139 | 3139 | 1.18 | 498 | 15.86 | 344 | 10.96 |
| 106 | MA0663.1 | MLX           | RTCACGTGAT          | 7.12E-08 | 8.69E-06 | 1.57E-02 | 122  | 3139 | 3139 | 3139 | 6.31 | 50  | 1.59  | 10  | 0.32  |
| 107 | MA0146.2 | Zfx           | SSSGCCBVGGCCTS      | 8.12E-09 | 8.90E-06 | 1.61E-02 | 1096 | 3139 | 3139 | 3139 | 16.6 | 170 | 5.42  | 82  | 2.61  |
| 108 | MA0620.2 | MITF          | NDRGTCACGTGACYHNN   | 5.28E-08 | 1.08E-05 | 1.96E-02 | 205  | 3139 | 3139 | 3139 | 40.3 | 28  | 0.89  | 1   | 0.03  |
| 109 | MA0139.1 | CTCF          | YGRCCASYAGRKGGCRSYR | 3.08E-08 | 1.10E-05 | 1.99E-02 | 357  | 3139 | 3139 | 3139 | 77.9 | 35  | 1.12  | 3   | 0.1   |
| 110 | MA0650.1 | HOXA13        | CYAATAAAAM          | 1.10E-08 | 1.13E-05 | 2.03E-02 | 1021 | 3139 | 3139 | 3139 | 1.21 | 566 | 18.03 | 405 | 12.9  |
| 111 | MA0790.1 | POU4F1        | ATGMATAATTAATG      | 1.35E-08 | 1.13E-05 | 2.05E-02 | 839  | 3139 | 3139 | 3139 | 1.53 | 450 | 14.34 | 306 | 9.75  |
| 112 | MA0148.3 | FOXA1         | YNBNTGTTACWYWD      | 2.44E-08 | 1.23E-05 | 2.23E-02 | 506  | 3139 | 3139 | 3139 | 4.7  | 206 | 6.56  | 111 | 3.54  |
| 113 | MA0664.1 | MLXIPL        | RTCACGTGAT          | 7.05E-08 | 1.63E-05 | 2.95E-02 | 231  | 3139 | 3139 | 3139 | 9.73 | 58  | 1.85  | 14  | 0.45  |
| 114 | MA0617.1 | Id2           | RCACGTGR            | 9.05E-08 | 1.73E-05 | 3.13E-02 | 191  | 3139 | 3139 | 3139 | 9.1  | 124 | 3.95  | 55  | 1.75  |
| 115 | MA0004.1 | Arnt          | CACGTG              | 4.90E-08 | 1.77E-05 | 3.21E-02 | 362  | 3139 | 3139 | 3139 | 4.81 | 136 | 4.33  | 62  | 1.98  |
| 116 | MA0773.1 | MEF2D         | DCTAWAAATAGM        | 2.30E-07 | 2.30E-05 | 4.16E-02 | 100  | 3139 | 3139 | 3139 | 1.19 | 75  | 2.39  | 25  | 0.8   |
| 117 | MA0831.2 | TFE3          | CACGTGAY            | 4.43E-08 | 2.31E-05 | 4.18E-02 | 521  | 3139 | 3139 | 3139 | 13.9 | 55  | 1.75  | 12  | 0.38  |
| 118 | MA0791.1 | POU4F3        | RTGMATWATTAATGAR    | 3.10E-08 | 2.34E-05 | 4.23E-02 | 755  | 3139 | 3139 | 3139 | 2.06 | 371 | 11.82 | 243 | 7.74  |



**Supplementary Table 9. FIMO motif scanning using JASPAR motif matrices using default p-value cutoff 1e-4 (GABPA)**

| GABPA motif | Alt ID     | Sequence Name | Strand | Start | End | p-value  | q-value | Matched Sequence |
|-------------|------------|---------------|--------|-------|-----|----------|---------|------------------|
| 1           | ACCGGAAGNS | NUDT5         | -      | 4     | 13  | 7.46E-07 | 0.0772  | ACCGGAAGAG       |
| 1           | ACCGGAAGNS | RPL29P11      | -      | 81    | 90  | 7.46E-07 | 0.0772  | ACCGGAAGAG       |
| 1           | ACCGGAAGNS | RPL29         | -      | 148   | 157 | 7.46E-07 | 0.0772  | ACCGGAAGAG       |
| 1           | ACCGGAAGNS | MED31         | +      | 97    | 106 | 7.46E-07 | 0.0772  | ACCGGAAGAG       |
| 1           | ACCGGAAGNS | SLC37A3       | -      | 5     | 14  | 1.49E-06 | 0.0772  | ACCGGAAGTG       |
| 1           | ACCGGAAGNS | NUDT1         | -      | 17    | 26  | 1.49E-06 | 0.0772  | ACCGGAAGTG       |
| 1           | ACCGGAAGNS | TNRC6A        | -      | 56    | 65  | 1.49E-06 | 0.0772  | ACCGGAAGTG       |
| 1           | ACCGGAAGNS | RBM8A         | -      | 73    | 82  | 1.49E-06 | 0.0772  | ACCGGAAGTG       |
| 1           | ACCGGAAGNS | ZNF230        | -      | 100   | 109 | 1.49E-06 | 0.0772  | ACCGGAAGTG       |
| 1           | ACCGGAAGNS | CHUK          | +      | 25    | 34  | 1.49E-06 | 0.0772  | ACCGGAAGTG       |
| 1           | ACCGGAAGNS | MRPL27        | +      | 27    | 36  | 1.49E-06 | 0.0772  | ACCGGAAGTG       |
| 1           | ACCGGAAGNS | ERVK3-1       | +      | 41    | 50  | 1.49E-06 | 0.0772  | ACCGGAAGTG       |
| 1           | ACCGGAAGNS | NUP54         | +      | 47    | 56  | 1.49E-06 | 0.0772  | ACCGGAAGTG       |
| 1           | ACCGGAAGNS | MED8          | +      | 79    | 88  | 1.49E-06 | 0.0772  | ACCGGAAGTG       |
| 1           | ACCGGAAGNS | MRPL3         | +      | 80    | 89  | 1.49E-06 | 0.0772  | ACCGGAAGTG       |
| 1           | ACCGGAAGNS | MTPN          | +      | 90    | 99  | 1.49E-06 | 0.0772  | ACCGGAAGTG       |
| 1           | ACCGGAAGNS | MED18         | +      | 117   | 126 | 1.49E-06 | 0.0772  | ACCGGAAGTG       |
| 1           | ACCGGAAGNS | SNORA21       | -      | 32    | 41  | 2.24E-06 | 0.0781  | ACCGGAAGAC       |
| 1           | ACCGGAAGNS | RPL18A        | -      | 96    | 105 | 2.24E-06 | 0.0781  | ACCGGAAGAC       |
| 1           | ACCGGAAGNS | ARV1          | -      | 156   | 165 | 2.24E-06 | 0.0781  | ACCGGAAGAC       |
| 1           | ACCGGAAGNS | RPS4X         | +      | 166   | 175 | 2.24E-06 | 0.0781  | ACCGGAAGAC       |
| 1           | ACCGGAAGNS | SLX4          | +      | 5     | 14  | 3.46E-06 | 0.0781  | ACCGGAAGCG       |
| 1           | ACCGGAAGNS | MINOS1        | +      | 15    | 24  | 3.46E-06 | 0.0781  | ACCGGAAGGG       |
| 1           | ACCGGAAGNS | PSMC6         | +      | 21    | 30  | 3.46E-06 | 0.0781  | ACCGGAAGGG       |
| 1           | ACCGGAAGNS | TEX22         | +      | 29    | 38  | 3.46E-06 | 0.0781  | ACCGGAAGCG       |
| 1           | ACCGGAAGNS | ADH5          | -      | 23    | 32  | 3.46E-06 | 0.0781  | ACCGGAAGGG       |
| 1           | ACCGGAAGNS | SARS          | -      | 26    | 35  | 3.46E-06 | 0.0781  | ACCGGAAGCG       |
| 1           | ACCGGAAGNS | UBA52         | +      | 56    | 65  | 3.46E-06 | 0.0781  | ACCGGAAGCG       |

|   |            |              |   |     |     |          |        |            |
|---|------------|--------------|---|-----|-----|----------|--------|------------|
| 1 | ACCGGAAGNS | WDR25        | - | 71  | 80  | 3.46E-06 | 0.0781 | ACCGGAAGCG |
| 1 | ACCGGAAGNS | EPN1         | - | 78  | 87  | 3.46E-06 | 0.0781 | ACCGGAAGCG |
| 1 | ACCGGAAGNS | UBL5         | - | 82  | 91  | 3.46E-06 | 0.0781 | ACCGGAAGCG |
| 1 | ACCGGAAGNS | HSBP1        | - | 85  | 94  | 3.46E-06 | 0.0781 | ACCGGAAGGG |
| 1 | ACCGGAAGNS | SNRPE        | - | 86  | 95  | 3.46E-06 | 0.0781 | ACCGGAAGCG |
| 1 | ACCGGAAGNS | NGDN         | + | 104 | 113 | 3.46E-06 | 0.0781 | ACCGGAAGGG |
| 1 | ACCGGAAGNS | MRPS23       | - | 97  | 106 | 3.46E-06 | 0.0781 | ACCGGAAGCG |
| 1 | ACCGGAAGNS | YAE1D1       | - | 106 | 115 | 3.46E-06 | 0.0781 | ACCGGAAGCG |
| 1 | ACCGGAAGNS | TOMM22       | - | 109 | 118 | 3.46E-06 | 0.0781 | ACCGGAAGCG |
| 1 | ACCGGAAGNS | CLASRP       | - | 116 | 125 | 3.46E-06 | 0.0781 | ACCGGAAGCG |
| 1 | ACCGGAAGNS | MGRN1        | - | 121 | 130 | 3.46E-06 | 0.0781 | ACCGGAAGCG |
| 1 | ACCGGAAGNS | POM121C      | - | 2   | 11  | 4.21E-06 | 0.0805 | ACCGGAAGTC |
| 1 | ACCGGAAGNS | POM121       | - | 8   | 17  | 4.21E-06 | 0.0805 | ACCGGAAGTC |
| 1 | ACCGGAAGNS | SDHD         | - | 22  | 31  | 4.21E-06 | 0.0805 | ACCGGAAGTC |
| 1 | ACCGGAAGNS | TIMMDC1      | + | 39  | 48  | 4.21E-06 | 0.0805 | ACCGGAAGTC |
| 1 | ACCGGAAGNS | KMT5A        | + | 89  | 98  | 4.21E-06 | 0.0805 | ACCGGAAGTC |
| 1 | ACCGGAAGNS | MAPK8IP3     | - | 86  | 95  | 4.21E-06 | 0.0805 | ACCGGAAGTC |
| 1 | ACCGGAAGNS | LINC00493    | + | 174 | 183 | 4.21E-06 | 0.0805 | ACCGGAAGTC |
| 1 | ACCGGAAGNS | RP11-57H14.5 | + | 58  | 67  | 5.43E-06 | 0.0828 | GCCGGAAGAG |
| 1 | ACCGGAAGNS | SNRPD1       | + | 80  | 89  | 5.43E-06 | 0.0828 | GCCGGAAGAG |
| 1 | ACCGGAAGNS | ERGIC3       | + | 119 | 128 | 5.43E-06 | 0.0828 | GCCGGAAGAG |
| 1 | ACCGGAAGNS | RPL34        | - | 112 | 121 | 5.43E-06 | 0.0828 | CCCGGAAGAG |
| 1 | ACCGGAAGNS | RPS10        | + | 124 | 133 | 5.43E-06 | 0.0828 | CCCGGAAGAG |
| 1 | ACCGGAAGNS | COMMD8       | + | 138 | 147 | 5.43E-06 | 0.0828 | GCCGGAAGAG |
| 1 | ACCGGAAGNS | AGO4         | + | 149 | 158 | 5.43E-06 | 0.0828 | GCCGGAAGAG |
| 1 | ACCGGAAGNS | CHCHD2       | - | 185 | 194 | 6.34E-06 | 0.0828 | ACCGGAAGAT |
| 1 | ACCGGAAGNS | LAMTOR1      | + | 91  | 100 | 7.57E-06 | 0.0828 | ACCGGAAGCC |
| 1 | ACCGGAAGNS | AC021037.1   | - | 45  | 54  | 8.31E-06 | 0.0828 | AGCGGAAGAG |
| 1 | ACCGGAAGNS | HSPA9        | + | 74  | 83  | 8.31E-06 | 0.0828 | AGCGGAAGAG |
| 1 | ACCGGAAGNS | ARPC5        | + | 92  | 101 | 8.31E-06 | 0.0828 | AGCGGAAGAG |

|   |            |          |   |     |     |          |        |            |
|---|------------|----------|---|-----|-----|----------|--------|------------|
| 1 | ACCGGAAGNS | AUTS2    | - | 119 | 128 | 8.31E-06 | 0.0828 | AGCGGAAGAG |
| 1 | ACCGGAAGNS | ATP5E    | - | 125 | 134 | 8.31E-06 | 0.0828 | AGCGGAAGAG |
| 1 | ACCGGAAGNS | FYCO1    | - | 147 | 156 | 8.31E-06 | 0.0828 | AGCGGAAGAG |
| 1 | ACCGGAAGNS | BPGM     | + | 7   | 16  | 9.22E-06 | 0.0828 | AACGGAAGAG |
| 1 | ACCGGAAGNS | CPSF7    | + | 3   | 12  | 1.04E-05 | 0.0828 | GCCGGAAGTG |
| 1 | ACCGGAAGNS | SF3A1    | + | 4   | 13  | 1.04E-05 | 0.0828 | CCCGGAAGTG |
| 1 | ACCGGAAGNS | MFAP3    | + | 8   | 17  | 1.04E-05 | 0.0828 | CCCGGAAGTG |
| 1 | ACCGGAAGNS | EEF1B2   | + | 10  | 19  | 1.04E-05 | 0.0828 | GCCGGAAGTG |
| 1 | ACCGGAAGNS | MRPL47   | + | 12  | 21  | 1.04E-05 | 0.0828 | GCCGGAAGTG |
| 1 | ACCGGAAGNS | MAGOH    | - | 3   | 12  | 1.04E-05 | 0.0828 | CCCGGAAGTG |
| 1 | ACCGGAAGNS | RRAGA    | + | 21  | 30  | 1.04E-05 | 0.0828 | GCCGGAAGTG |
| 1 | ACCGGAAGNS | GRPEL2   | + | 22  | 31  | 1.04E-05 | 0.0828 | GCCGGAAGTG |
| 1 | ACCGGAAGNS | RPS19    | - | 14  | 23  | 1.04E-05 | 0.0828 | GCCGGAAGTG |
| 1 | ACCGGAAGNS | NDUFB5   | - | 15  | 24  | 1.04E-05 | 0.0828 | GCCGGAAGTG |
| 1 | ACCGGAAGNS | FAM114A2 | - | 15  | 24  | 1.04E-05 | 0.0828 | CCCGGAAGTG |
| 1 | ACCGGAAGNS | FTSJ2    | - | 16  | 25  | 1.04E-05 | 0.0828 | GCCGGAAGTG |
| 1 | ACCGGAAGNS | ATG4C    | + | 29  | 38  | 1.04E-05 | 0.0828 | CCCGGAAGTG |
| 1 | ACCGGAAGNS | CSTF1    | + | 39  | 48  | 1.04E-05 | 0.0828 | CCCGGAAGTG |
| 1 | ACCGGAAGNS | SSBP1    | + | 42  | 51  | 1.04E-05 | 0.0828 | GCCGGAAGTG |
| 1 | ACCGGAAGNS | UQCRH    | - | 42  | 51  | 1.04E-05 | 0.0828 | GCCGGAAGTG |
| 1 | ACCGGAAGNS | TOMM6    | + | 52  | 61  | 1.04E-05 | 0.0828 | GCCGGAAGTG |
| 1 | ACCGGAAGNS | PSMB7    | + | 56  | 65  | 1.04E-05 | 0.0828 | GCCGGAAGTG |
| 1 | ACCGGAAGNS | RPL32    | + | 72  | 81  | 1.04E-05 | 0.0828 | GCCGGAAGTG |
| 1 | ACCGGAAGNS | SDHAF2   | + | 72  | 81  | 1.04E-05 | 0.0828 | CCCGGAAGTG |
| 1 | ACCGGAAGNS | ROMO1    | + | 73  | 82  | 1.04E-05 | 0.0828 | CCCGGAAGTG |
| 1 | ACCGGAAGNS | TMEM208  | + | 79  | 88  | 1.04E-05 | 0.0828 | GCCGGAAGTG |
| 1 | ACCGGAAGNS | ZNF384   | + | 83  | 92  | 1.04E-05 | 0.0828 | GCCGGAAGTG |
| 1 | ACCGGAAGNS | MARK3    | - | 75  | 84  | 1.04E-05 | 0.0828 | GCCGGAAGTG |
| 1 | ACCGGAAGNS | DDX50    | + | 89  | 98  | 1.04E-05 | 0.0828 | CCCGGAAGTG |
| 1 | ACCGGAAGNS | POMP     | - | 81  | 90  | 1.04E-05 | 0.0828 | GCCGGAAGTG |

|   |            |          |   |     |     |          |        |            |
|---|------------|----------|---|-----|-----|----------|--------|------------|
| 1 | ACCGGAAGNS | AKAP17A  | + | 95  | 104 | 1.04E-05 | 0.0828 | GCCGGAAGTG |
| 1 | ACCGGAAGNS | MBD6     | + | 96  | 105 | 1.04E-05 | 0.0828 | CCCGGAAGTG |
| 1 | ACCGGAAGNS | PNPLA4   | - | 87  | 96  | 1.04E-05 | 0.0828 | CCCGGAAGTG |
| 1 | ACCGGAAGNS | HAT1     | - | 87  | 96  | 1.04E-05 | 0.0828 | GCCGGAAGTG |
| 1 | ACCGGAAGNS | COMMD2   | + | 99  | 108 | 1.04E-05 | 0.0828 | GCCGGAAGTG |
| 1 | ACCGGAAGNS | PARK7    | + | 100 | 109 | 1.04E-05 | 0.0828 | GCCGGAAGTG |
| 1 | ACCGGAAGNS | ZNF384   | + | 104 | 113 | 1.04E-05 | 0.0828 | CCCGGAAGTG |
| 1 | ACCGGAAGNS | SLC25A17 | + | 105 | 114 | 1.04E-05 | 0.0828 | CCCGGAAGTG |
| 1 | ACCGGAAGNS | TM2D3    | + | 105 | 114 | 1.04E-05 | 0.0828 | CCCGGAAGTG |
| 1 | ACCGGAAGNS | BOD1L1   | - | 98  | 107 | 1.04E-05 | 0.0828 | CCCGGAAGTG |
| 1 | ACCGGAAGNS | CLPTM1L  | - | 100 | 109 | 1.04E-05 | 0.0828 | GCCGGAAGTG |
| 1 | ACCGGAAGNS | EMC4     | + | 109 | 118 | 1.04E-05 | 0.0828 | GCCGGAAGTG |
| 1 | ACCGGAAGNS | ELOVL6   | - | 102 | 111 | 1.04E-05 | 0.0828 | GCCGGAAGTG |
| 1 | ACCGGAAGNS | PSMB1    | + | 118 | 127 | 1.04E-05 | 0.0828 | GCCGGAAGTG |
| 1 | ACCGGAAGNS | FAM195B  | - | 111 | 120 | 1.04E-05 | 0.0828 | GCCGGAAGTG |
| 1 | ACCGGAAGNS | LEPROTL1 | - | 112 | 121 | 1.04E-05 | 0.0828 | CCCGGAAGTG |
| 1 | ACCGGAAGNS | NUP58    | - | 119 | 128 | 1.04E-05 | 0.0828 | GCCGGAAGTG |
| 1 | ACCGGAAGNS | DDOST    | - | 120 | 129 | 1.04E-05 | 0.0828 | GCCGGAAGTG |
| 1 | ACCGGAAGNS | PNPLA4   | - | 120 | 129 | 1.04E-05 | 0.0828 | CCCGGAAGTG |
| 1 | ACCGGAAGNS | RTFDC1   | + | 130 | 139 | 1.04E-05 | 0.0828 | GCCGGAAGTG |
| 1 | ACCGGAAGNS | RTFDC1   | + | 161 | 170 | 1.04E-05 | 0.0828 | CCCGGAAGTG |
| 1 | ACCGGAAGNS | CHERP    | - | 176 | 185 | 1.04E-05 | 0.0828 | GCCGGAAGTG |
| 1 | ACCGGAAGNS | APMAP    | - | 181 | 190 | 1.04E-05 | 0.0828 | CCCGGAAGTG |
| 1 | ACCGGAAGNS | NELFE    | - | 11  | 20  | 1.23E-05 | 0.0901 | ACCGGAAGTT |
| 1 | ACCGGAAGNS | TMEM199  | - | 64  | 73  | 1.23E-05 | 0.0901 | ACCGGAAGTT |
| 1 | ACCGGAAGNS | AAR2     | - | 102 | 111 | 1.23E-05 | 0.0901 | ACCGGAAGTT |
| 1 | ACCGGAAGNS | PSMD8    | - | 117 | 126 | 1.23E-05 | 0.0901 | ACCGGAAGTT |
| 1 | ACCGGAAGNS | SSR2     | - | 127 | 136 | 1.23E-05 | 0.0901 | ACAGGAAGAG |
| 1 | ACCGGAAGNS | LZIC     | + | 14  | 23  | 1.30E-05 | 0.0901 | AGCGGAAGTG |
| 1 | ACCGGAAGNS | RPS6     | - | 39  | 48  | 1.30E-05 | 0.0901 | AGCGGAAGTG |

|   |            |              |   |     |     |          |        |            |
|---|------------|--------------|---|-----|-----|----------|--------|------------|
| 1 | ACCGGAAGNS | SMU1         | + | 54  | 63  | 1.30E-05 | 0.0901 | AGCGGAAGTG |
| 1 | ACCGGAAGNS | RPS18        | - | 56  | 65  | 1.30E-05 | 0.0901 | AGCGGAAGTG |
| 1 | ACCGGAAGNS | PIK3R4       | - | 77  | 86  | 1.30E-05 | 0.0901 | AGCGGAAGTG |
| 1 | ACCGGAAGNS | COPS3        | + | 88  | 97  | 1.30E-05 | 0.0901 | AGCGGAAGTG |
| 1 | ACCGGAAGNS | SNRPE        | - | 80  | 89  | 1.30E-05 | 0.0901 | AGCGGAAGTG |
| 1 | ACCGGAAGNS | LYRM2        | - | 92  | 101 | 1.30E-05 | 0.0901 | AGCGGAAGTG |
| 1 | ACCGGAAGNS | COX6A1       | - | 100 | 109 | 1.30E-05 | 0.0901 | AGCGGAAGTG |
| 1 | ACCGGAAGNS | PSMB4        | - | 100 | 109 | 1.30E-05 | 0.0901 | AGCGGAAGTG |
| 1 | ACCGGAAGNS | TIMM23       | + | 117 | 126 | 1.30E-05 | 0.0901 | AGCGGAAGTG |
| 1 | ACCGGAAGNS | TMEM116      | - | 101 | 110 | 1.42E-05 | 0.094  | GCCGGAAGAC |
| 1 | ACCGGAAGNS | TIMM10B      | + | 36  | 45  | 1.51E-05 | 0.094  | AACGGAAGTG |
| 1 | ACCGGAAGNS | KBTBD4       | + | 96  | 105 | 1.51E-05 | 0.094  | AACGGAAGTG |
| 1 | ACCGGAAGNS | POMP         | + | 114 | 123 | 1.51E-05 | 0.094  | AACGGAAGTG |
| 1 | ACCGGAAGNS | MYEOV2       | + | 9   | 18  | 1.79E-05 | 0.094  | CCCGGAAGGG |
| 1 | ACCGGAAGNS | JKAMP        | + | 18  | 27  | 1.79E-05 | 0.094  | CCCGGAAGCG |
| 1 | ACCGGAAGNS | RP11-46F15.2 | + | 19  | 28  | 1.79E-05 | 0.094  | GCCGGAAGCG |
| 1 | ACCGGAAGNS | RPS21        | + | 24  | 33  | 1.79E-05 | 0.094  | CCCGGAAGCG |
| 1 | ACCGGAAGNS | UVSSA        | + | 26  | 35  | 1.79E-05 | 0.094  | GCCGGAAGGG |
| 1 | ACCGGAAGNS | TNRC6A       | + | 28  | 37  | 1.79E-05 | 0.094  | CCCGGAAGGG |
| 1 | ACCGGAAGNS | FAM234A      | + | 33  | 42  | 1.79E-05 | 0.094  | CCCGGAAGCG |
| 1 | ACCGGAAGNS | TMEM251      | - | 26  | 35  | 1.79E-05 | 0.094  | GCCGGAAGCG |
| 1 | ACCGGAAGNS | SNAPC5       | + | 37  | 46  | 1.79E-05 | 0.094  | GCCGGAAGGG |
| 1 | ACCGGAAGNS | NUDT1        | + | 40  | 49  | 1.79E-05 | 0.094  | CCCGGAAGCG |
| 1 | ACCGGAAGNS | FAM103A1     | + | 41  | 50  | 1.79E-05 | 0.094  | GCCGGAAGCG |
| 1 | ACCGGAAGNS | TRMT10C      | + | 58  | 67  | 1.79E-05 | 0.094  | GCCGGAAGGG |
| 1 | ACCGGAAGNS | DPH3         | + | 68  | 77  | 1.79E-05 | 0.094  | GCCGGAAGGG |
| 1 | ACCGGAAGNS | XPOT         | + | 69  | 78  | 1.79E-05 | 0.094  | CCCGGAAGCG |
| 1 | ACCGGAAGNS | OXSM         | - | 65  | 74  | 1.79E-05 | 0.094  | CCCGGAAGCG |
| 1 | ACCGGAAGNS | DIDO1        | + | 75  | 84  | 1.79E-05 | 0.094  | CCCGGAAGCG |
| 1 | ACCGGAAGNS | PDIA3P2      | - | 68  | 77  | 1.79E-05 | 0.094  | GCCGGAAGGG |

|   |            |               |   |     |     |          |        |            |
|---|------------|---------------|---|-----|-----|----------|--------|------------|
| 1 | ACCGGAAGNS | EP400         | - | 86  | 95  | 1.79E-05 | 0.094  | GCCGGAAGGG |
| 1 | ACCGGAAGNS | MRPL20        | + | 99  | 108 | 1.79E-05 | 0.094  | CCCGGAAGCG |
| 1 | ACCGGAAGNS | RARS          | - | 90  | 99  | 1.79E-05 | 0.094  | CCCGGAAGCG |
| 1 | ACCGGAAGNS | LINC00493     | + | 104 | 113 | 1.79E-05 | 0.094  | GCCGGAAGCG |
| 1 | ACCGGAAGNS | PROSER3       | + | 111 | 120 | 1.79E-05 | 0.094  | GCCGGAAGCG |
| 1 | ACCGGAAGNS | COX6A1        | - | 106 | 115 | 1.79E-05 | 0.094  | GCCGGAAGCG |
| 1 | ACCGGAAGNS | ADGRG6        | + | 115 | 124 | 1.79E-05 | 0.094  | GCCGGAAGCG |
| 1 | ACCGGAAGNS | RBM45         | + | 116 | 125 | 1.79E-05 | 0.094  | CCCGGAAGCG |
| 1 | ACCGGAAGNS | CLPTM1L       | + | 121 | 130 | 1.79E-05 | 0.094  | CCCGGAAGCG |
| 1 | ACCGGAAGNS | AC114730.8    | - | 123 | 132 | 1.79E-05 | 0.094  | CCCGGAAGCG |
| 1 | ACCGGAAGNS | METTL5        | - | 126 | 135 | 1.79E-05 | 0.094  | GCCGGAAGCG |
| 1 | ACCGGAAGNS | KBTBD4        | + | 137 | 146 | 1.79E-05 | 0.094  | GCCGGAAGCG |
| 1 | ACCGGAAGNS | RP11-274B21.4 | - | 134 | 143 | 1.79E-05 | 0.094  | GCCGGAAGGG |
| 1 | ACCGGAAGNS | DDX18         | + | 149 | 158 | 1.79E-05 | 0.094  | GCCGGAAGGG |
| 1 | ACCGGAAGNS | AC011747.4    | + | 158 | 167 | 1.79E-05 | 0.094  | CCCGGAAGCG |
| 1 | ACCGGAAGNS | SNRPD1        | - | 175 | 184 | 1.79E-05 | 0.094  | GCCGGAAGCG |
| 1 | ACCGGAAGNS | ZNF621        | - | 181 | 190 | 1.79E-05 | 0.094  | GCCGGAAGGG |
| 1 | ACCGGAAGNS | ZFP41         | + | 191 | 200 | 1.79E-05 | 0.094  | GCCGGAAGGG |
| 1 | ACCGGAAGNS | PRRC2C        | - | 183 | 192 | 1.79E-05 | 0.094  | GCCGGAAGGG |
| 1 | ACCGGAAGNS | FAM50B        | - | 4   | 13  | 1.88E-05 | 0.094  | ACAGGAAGTG |
| 1 | ACCGGAAGNS | RP11-46F15.2  | - | 46  | 55  | 1.88E-05 | 0.094  | ACAGGAAGTG |
| 1 | ACCGGAAGNS | RP4-591C20.9  | - | 77  | 86  | 1.88E-05 | 0.094  | ACAGGAAGTG |
| 1 | ACCGGAAGNS | FAM50B        | - | 87  | 96  | 1.88E-05 | 0.094  | ACAGGAAGTG |
| 1 | ACCGGAAGNS | PSMB5         | - | 154 | 163 | 1.88E-05 | 0.094  | ACAGGAAGTG |
| 1 | ACCGGAAGNS | TOMM5         | + | 19  | 28  | 1.88E-05 | 0.094  | ACAGGAAGTG |
| 1 | ACCGGAAGNS | PIK3R4        | + | 92  | 101 | 1.88E-05 | 0.094  | ACAGGAAGTG |
| 1 | ACCGGAAGNS | SMIM6         | + | 123 | 132 | 1.88E-05 | 0.094  | ACAGGAAGTG |
| 1 | ACCGGAAGNS | CTA-221G9.12  | + | 186 | 195 | 1.88E-05 | 0.094  | ACAGGAAGTG |
| 1 | ACCGGAAGNS | RP3-325F22.5  | - | 11  | 20  | 2.03E-05 | 0.0986 | ACCGGAAGCT |
| 1 | ACCGGAAGNS | RPL29P14      | - | 65  | 74  | 2.03E-05 | 0.0986 | ACCGGAAGCT |

|   |            |               |   |     |     |          |        |            |
|---|------------|---------------|---|-----|-----|----------|--------|------------|
| 1 | ACCGGAAGNS | PHF5A         | - | 143 | 152 | 2.03E-05 | 0.0986 | ACCGGAAGCT |
| 1 | ACCGGAAGNS | RP11-403P17.6 | - | 155 | 164 | 2.03E-05 | 0.0986 | ACCGGAAGCT |
| 1 | ACCGGAAGNS | SNRPG         | + | 41  | 50  | 2.03E-05 | 0.0986 | ACCGGAAGCT |
| 1 | ACCGGAAGNS | RP11-568K15.1 | - | 16  | 25  | 2.24E-05 | 0.104  | AGCGGAAGGG |
| 1 | ACCGGAAGNS | ADSL          | - | 108 | 117 | 2.24E-05 | 0.104  | AGCGGAAGCG |
| 1 | ACCGGAAGNS | RPS15         | + | 62  | 71  | 2.24E-05 | 0.104  | AGCGGAAGCG |
| 1 | ACCGGAAGNS | ATP6AP2       | + | 124 | 133 | 2.24E-05 | 0.104  | AGCGGAAGCG |
| 1 | ACCGGAAGNS | RP11-459F6.3  | + | 142 | 151 | 2.24E-05 | 0.104  | AGCGGAAGGG |
| 1 | ACCGGAAGNS | MRPS18C       | + | 163 | 172 | 2.24E-05 | 0.104  | AGCGGAAGGG |
| 1 | ACCGGAAGNS | PTPN23        | - | 2   | 11  | 2.37E-05 | 0.104  | GCCGGAAGTC |
| 1 | ACCGGAAGNS | ZNF814        | - | 11  | 20  | 2.37E-05 | 0.104  | GCCGGAAGTC |
| 1 | ACCGGAAGNS | CTC-487M23.8  | - | 82  | 91  | 2.37E-05 | 0.104  | GCCGGAAGTC |
| 1 | ACCGGAAGNS | SFT2D1        | - | 112 | 121 | 2.37E-05 | 0.104  | GCCGGAAGTC |
| 1 | ACCGGAAGNS | SNHG3         | - | 112 | 121 | 2.37E-05 | 0.104  | CCCGGAAGTC |
| 1 | ACCGGAAGNS | AKAP17A       | + | 9   | 18  | 2.37E-05 | 0.104  | CCCGGAAGTC |
| 1 | ACCGGAAGNS | HCCS          | + | 67  | 76  | 2.37E-05 | 0.104  | CCCGGAAGTC |
| 1 | ACCGGAAGNS | ZDHHC4        | + | 69  | 78  | 2.37E-05 | 0.104  | GCCGGAAGTC |
| 1 | ACCGGAAGNS | SAR1A         | + | 83  | 92  | 2.37E-05 | 0.104  | CCCGGAAGTC |
| 1 | ACCGGAAGNS | COX5B         | + | 85  | 94  | 2.37E-05 | 0.104  | CCCGGAAGTC |
| 1 | ACCGGAAGNS | VPS25         | + | 94  | 103 | 2.37E-05 | 0.104  | GCCGGAAGTC |
| 1 | ACCGGAAGNS | TMEM223       | + | 110 | 119 | 2.37E-05 | 0.104  | CCCGGAAGTC |
| 1 | ACCGGAAGNS | MTX2          | + | 141 | 150 | 2.37E-05 | 0.104  | GCCGGAAGTC |
| 1 | ACCGGAAGNS | PSMB4         | - | 106 | 115 | 2.61E-05 | 0.113  | AACGGAAGCG |
| 1 | ACCGGAAGNS | HSBP1         | + | 62  | 71  | 2.61E-05 | 0.113  | AACGGAAGCG |
| 1 | ACCGGAAGNS | CTD-2024I7.13 | + | 79  | 88  | 2.61E-05 | 0.113  | AACGGAAGGG |
| 1 | ACCGGAAGNS | FAM103A1      | + | 47  | 56  | 2.68E-05 | 0.115  | AGCGGAAGTC |
| 1 | ACCGGAAGNS | SRP14         | + | 87  | 96  | 2.68E-05 | 0.115  | AGCGGAAGTC |
| 1 | ACCGGAAGNS | POM121C       | - | 81  | 90  | 2.83E-05 | 0.116  | ACAGGAAGCG |
| 1 | ACCGGAAGNS | SLC37A2       | + | 7   | 16  | 2.83E-05 | 0.116  | ACAGGAAGCG |
| 1 | ACCGGAAGNS | SCAF4         | + | 27  | 36  | 2.83E-05 | 0.116  | ACAGGAAGCG |

|   |            |                |   |     |     |          |       |            |
|---|------------|----------------|---|-----|-----|----------|-------|------------|
| 1 | ACCGGAAGNS | SFT2D1         | + | 92  | 101 | 2.83E-05 | 0.116 | ACAGGAAGCG |
| 1 | ACCGGAAGNS | TCP1           | - | 13  | 22  | 2.92E-05 | 0.116 | AACGGAAGTC |
| 1 | ACCGGAAGNS | RP11-459F6.3   | - | 29  | 38  | 2.92E-05 | 0.116 | AACGGAAGTC |
| 1 | ACCGGAAGNS | MRPL18         | + | 41  | 50  | 2.92E-05 | 0.116 | AACGGAAGTC |
| 1 | ACCGGAAGNS | CFAP20         | + | 41  | 50  | 2.92E-05 | 0.116 | AACGGAAGTC |
| 1 | ACCGGAAGNS | ZBTB6          | - | 124 | 133 | 3.07E-05 | 0.116 | GCCGGAAGAT |
| 1 | ACCGGAAGNS | MTRNR2L10      | + | 53  | 62  | 3.07E-05 | 0.116 | CCCGGAAGAT |
| 1 | ACCGGAAGNS | SLC25A5-AS1    | - | 7   | 16  | 3.27E-05 | 0.116 | GCCGGAAGCC |
| 1 | ACCGGAAGNS | B3GALNT1       | - | 12  | 21  | 3.27E-05 | 0.116 | GCCGGAAGCC |
| 1 | ACCGGAAGNS | ZNF785         | - | 13  | 22  | 3.27E-05 | 0.116 | GCCGGAAGGC |
| 1 | ACCGGAAGNS | RNF144A-AS1    | - | 15  | 24  | 3.27E-05 | 0.116 | CCCGGAAGGC |
| 1 | ACCGGAAGNS | C4orf46        | - | 21  | 30  | 3.27E-05 | 0.116 | CCCGGAAGCC |
| 1 | ACCGGAAGNS | XPOT           | - | 28  | 37  | 3.27E-05 | 0.116 | GCCGGAAGGC |
| 1 | ACCGGAAGNS | UQCR11         | - | 30  | 39  | 3.27E-05 | 0.116 | CCCGGAAGCC |
| 1 | ACCGGAAGNS | FAM21C         | - | 50  | 59  | 3.27E-05 | 0.116 | CCCGGAAGCC |
| 1 | ACCGGAAGNS | UBL5           | - | 56  | 65  | 3.27E-05 | 0.116 | GCCGGAAGCC |
| 1 | ACCGGAAGNS | EMC3           | - | 59  | 68  | 3.27E-05 | 0.116 | GCCGGAAGCC |
| 1 | ACCGGAAGNS | NDUFS5         | - | 63  | 72  | 3.27E-05 | 0.116 | GCCGGAAGCC |
| 1 | ACCGGAAGNS | SACM1L         | - | 71  | 80  | 3.27E-05 | 0.116 | CCCGGAAGCC |
| 1 | ACCGGAAGNS | CTD-2619J13.14 | - | 75  | 84  | 3.27E-05 | 0.116 | GCCGGAAGCC |
| 1 | ACCGGAAGNS | AC005785.2     | - | 79  | 88  | 3.27E-05 | 0.116 | CCCGGAAGCC |
| 1 | ACCGGAAGNS | SLC22A23       | - | 93  | 102 | 3.27E-05 | 0.116 | CCCGGAAGCC |
| 1 | ACCGGAAGNS | AC006548.28    | - | 94  | 103 | 3.27E-05 | 0.116 | CCCGGAAGCC |
| 1 | ACCGGAAGNS | NUP54          | - | 107 | 116 | 3.27E-05 | 0.116 | GCCGGAAGGC |
| 1 | ACCGGAAGNS | ZW10           | - | 113 | 122 | 3.27E-05 | 0.116 | CCCGGAAGGC |
| 1 | ACCGGAAGNS | CHID1          | - | 125 | 134 | 3.27E-05 | 0.116 | GCCGGAAGCC |
| 1 | ACCGGAAGNS | FAM21A         | - | 134 | 143 | 3.27E-05 | 0.116 | CCCGGAAGCC |
| 1 | ACCGGAAGNS | RP1-101K10.6   | - | 137 | 146 | 3.27E-05 | 0.116 | GCCGGAAGGC |
| 1 | ACCGGAAGNS | GRID2IP        | - | 152 | 161 | 3.27E-05 | 0.116 | GCCGGAAGCC |
| 1 | ACCGGAAGNS | EMC7           | - | 171 | 180 | 3.27E-05 | 0.116 | CCCGGAAGCC |



|   |            |          |   |     |     |          |       |            |
|---|------------|----------|---|-----|-----|----------|-------|------------|
| 1 | ACCGGAAGNS | SSR3     | + | 4   | 13  | 3.27E-05 | 0.116 | CCCGGAAGCC |
| 1 | ACCGGAAGNS | STIM2    | + | 14  | 23  | 3.27E-05 | 0.116 | GCCGGAAGCC |
| 1 | ACCGGAAGNS | EHP1L1   | + | 24  | 33  | 3.27E-05 | 0.116 | CCCGGAAGCC |
| 1 | ACCGGAAGNS | UBR1     | + | 49  | 58  | 3.27E-05 | 0.116 | GCCGGAAGCC |
| 1 | ACCGGAAGNS | RBM45    | + | 59  | 68  | 3.27E-05 | 0.116 | CCCGGAAGGC |
| 1 | ACCGGAAGNS | PLEKHG2  | + | 60  | 69  | 3.27E-05 | 0.116 | GCCGGAAGGC |
| 1 | ACCGGAAGNS | COX14    | + | 91  | 100 | 3.27E-05 | 0.116 | CCCGGAAGCC |
| 1 | ACCGGAAGNS | PGM2     | + | 144 | 153 | 3.27E-05 | 0.116 | GCCGGAAGGC |
| 1 | ACCGGAAGNS | GTF3C6   | + | 147 | 156 | 3.27E-05 | 0.116 | GCCGGAAGCC |
| 1 | ACCGGAAGNS | AKAP17A  | - | 76  | 85  | 3.39E-05 | 0.117 | CGCGGAAGAG |
| 1 | ACCGGAAGNS | TOMM7    | + | 5   | 14  | 3.39E-05 | 0.117 | GCGGAAGAG  |
| 1 | ACCGGAAGNS | SLC25A3  | + | 19  | 28  | 3.39E-05 | 0.117 | GCGGAAGAG  |
| 1 | ACCGGAAGNS | SRRD     | + | 103 | 112 | 3.39E-05 | 0.117 | CGCGGAAGAG |
| 1 | ACCGGAAGNS | UMPS     | + | 115 | 124 | 3.39E-05 | 0.117 | GCGGAAGAG  |
| 1 | ACCGGAAGNS | RPL23    | + | 119 | 128 | 3.39E-05 | 0.117 | GCGGAAGAG  |
| 1 | ACCGGAAGNS | FBXW4P1  | + | 156 | 165 | 3.39E-05 | 0.117 | GCGGAAGAG  |
| 1 | ACCGGAAGNS | TIMMDC1  | - | 106 | 115 | 3.48E-05 | 0.12  | ACAGGAAGTC |
| 1 | ACCGGAAGNS | NABP2    | + | 135 | 144 | 3.48E-05 | 0.12  | ACAGGAAGTC |
| 1 | ACCGGAAGNS | SRRM2    | + | 82  | 91  | 3.70E-05 | 0.124 | AGCGGAAGGC |
| 1 | ACCGGAAGNS | RTN3P1   | + | 182 | 191 | 3.70E-05 | 0.124 | AGCGGAAGCC |
| 1 | ACCGGAAGNS | RPL27    | - | 35  | 44  | 3.85E-05 | 0.124 | GACGGAAGAG |
| 1 | ACCGGAAGNS | URM1     | - | 73  | 82  | 3.85E-05 | 0.124 | GACGGAAGAG |
| 1 | ACCGGAAGNS | GRPEL1   | - | 107 | 116 | 3.85E-05 | 0.124 | CACGGAAGAG |
| 1 | ACCGGAAGNS | SEP15    | + | 5   | 14  | 3.85E-05 | 0.124 | GACGGAAGAG |
| 1 | ACCGGAAGNS | MIR941-1 | + | 17  | 26  | 3.85E-05 | 0.124 | CACGGAAGAG |
| 1 | ACCGGAAGNS | ARHGAP19 | + | 60  | 69  | 3.85E-05 | 0.124 | CACGGAAGAG |
| 1 | ACCGGAAGNS | MIR941-1 | + | 73  | 82  | 3.85E-05 | 0.124 | CACGGAAGAG |
| 1 | ACCGGAAGNS | ASGR1    | + | 112 | 121 | 3.85E-05 | 0.124 | CACGGAAGAG |
| 1 | ACCGGAAGNS | MIR941-1 | + | 129 | 138 | 3.85E-05 | 0.124 | CACGGAAGAG |
| 1 | ACCGGAAGNS | MIR941-1 | + | 185 | 194 | 3.85E-05 | 0.124 | CACGGAAGAG |

|   |            |               |   |     |     |          |       |            |
|---|------------|---------------|---|-----|-----|----------|-------|------------|
| 1 | ACCGGAAGNS | RP11-84D1.1   | - | 114 | 123 | 3.96E-05 | 0.124 | AACGGAAGAT |
| 1 | ACCGGAAGNS | UNC50         | - | 1   | 10  | 4.41E-05 | 0.124 | GCCGGAAGTT |
| 1 | ACCGGAAGNS | MRPS22        | - | 2   | 11  | 4.41E-05 | 0.124 | CCAGGAAGAG |
| 1 | ACCGGAAGNS | CHCHD2        | - | 10  | 19  | 4.41E-05 | 0.124 | CCCGGAAGTT |
| 1 | ACCGGAAGNS | DCTN3         | - | 18  | 27  | 4.41E-05 | 0.124 | GCCGGAAGTT |
| 1 | ACCGGAAGNS | PRSS48        | - | 42  | 51  | 4.41E-05 | 0.124 | CCAGGAAGAG |
| 1 | ACCGGAAGNS | RP11-568K15.1 | - | 53  | 62  | 4.41E-05 | 0.124 | GCAGGAAGAG |
| 1 | ACCGGAAGNS | RP11-284F21.7 | - | 62  | 71  | 4.41E-05 | 0.124 | AACGGAAGCC |
| 1 | ACCGGAAGNS | YARS          | - | 64  | 73  | 4.41E-05 | 0.124 | GCAGGAAGAG |
| 1 | ACCGGAAGNS | TRMT10C       | - | 77  | 86  | 4.41E-05 | 0.124 | GCCGGAAGTT |
| 1 | ACCGGAAGNS | COX8A         | - | 94  | 103 | 4.41E-05 | 0.124 | GCCGGAAGTT |
| 1 | ACCGGAAGNS | SCARNA21      | - | 106 | 115 | 4.41E-05 | 0.124 | CCCGGAAGTT |
| 1 | ACCGGAAGNS | CREG1         | - | 107 | 116 | 4.41E-05 | 0.124 | CCAGGAAGAG |
| 1 | ACCGGAAGNS | COIL          | - | 112 | 121 | 4.41E-05 | 0.124 | AACGGAAGCC |
| 1 | ACCGGAAGNS | SRP14         | - | 114 | 123 | 4.41E-05 | 0.124 | GCCGGAAGTT |
| 1 | ACCGGAAGNS | CHID1         | - | 116 | 125 | 4.41E-05 | 0.124 | CCAGGAAGAG |
| 1 | ACCGGAAGNS | RPL11         | - | 128 | 137 | 4.41E-05 | 0.124 | GCAGGAAGAG |
| 1 | ACCGGAAGNS | RP11-466A19.1 | - | 165 | 174 | 4.41E-05 | 0.124 | GCAGGAAGAG |
| 1 | ACCGGAAGNS | PSMC1         | - | 167 | 176 | 4.41E-05 | 0.124 | GCCGGAAGTT |
| 1 | ACCGGAAGNS | RP3-395C13.1  | - | 170 | 179 | 4.41E-05 | 0.124 | CCAGGAAGAG |
| 1 | ACCGGAAGNS | ADSS          | - | 175 | 184 | 4.41E-05 | 0.124 | GCAGGAAGAG |
| 1 | ACCGGAAGNS | UQCR11        | + | 11  | 20  | 4.41E-05 | 0.124 | GCCGGAAGTT |
| 1 | ACCGGAAGNS | NME1          | + | 15  | 24  | 4.41E-05 | 0.124 | GCCGGAAGTT |
| 1 | ACCGGAAGNS | RP11-395B7.2  | + | 16  | 25  | 4.41E-05 | 0.124 | CCAGGAAGAG |
| 1 | ACCGGAAGNS | CCDC74BP1     | + | 18  | 27  | 4.41E-05 | 0.124 | CCAGGAAGAG |
| 1 | ACCGGAAGNS | TARS          | + | 24  | 33  | 4.41E-05 | 0.124 | CCCGGAAGTT |
| 1 | ACCGGAAGNS | UQCRQ         | + | 28  | 37  | 4.41E-05 | 0.124 | CCCGGAAGTT |
| 1 | ACCGGAAGNS | HMGNI1P2      | + | 43  | 52  | 4.41E-05 | 0.124 | GCAGGAAGAG |
| 1 | ACCGGAAGNS | PSMB3         | + | 71  | 80  | 4.41E-05 | 0.124 | CCAGGAAGAG |
| 1 | ACCGGAAGNS | COX14         | + | 98  | 107 | 4.41E-05 | 0.124 | GCCGGAAGTT |

|   |            |               |   |     |     |          |       |            |
|---|------------|---------------|---|-----|-----|----------|-------|------------|
| 1 | ACCGGAAGNS | RP11-802O23.3 | + | 103 | 112 | 4.41E-05 | 0.124 | CCAGGAAGAG |
| 1 | ACCGGAAGNS | COX5B         | + | 117 | 126 | 4.41E-05 | 0.124 | CCCGGAAGTT |
| 1 | ACCGGAAGNS | URM1          | + | 119 | 128 | 4.41E-05 | 0.124 | GCCGGAAGTT |
| 1 | ACCGGAAGNS | JAGN1         | + | 147 | 156 | 4.41E-05 | 0.124 | GCCGGAAGTT |
| 1 | ACCGGAAGNS | COPB2         | + | 155 | 164 | 4.41E-05 | 0.124 | CCCGGAAGTT |
| 1 | ACCGGAAGNS | CTB-129O4.1   | + | 181 | 190 | 4.41E-05 | 0.124 | GCAGGAAGAG |
| 1 | ACCGGAAGNS | RP4-734G22.3  | + | 185 | 194 | 4.41E-05 | 0.124 | GCAGGAAGAG |
| 1 | ACCGGAAGNS | RP11-449P15.2 | - | 20  | 29  | 4.53E-05 | 0.124 | GGCGGAAGTG |
| 1 | ACCGGAAGNS | ZDHHC4        | - | 62  | 71  | 4.53E-05 | 0.124 | GGCGGAAGTG |
| 1 | ACCGGAAGNS | MAGOH         | - | 67  | 76  | 4.53E-05 | 0.124 | CGCGGAAGTG |
| 1 | ACCGGAAGNS | TIMM17A       | - | 71  | 80  | 4.53E-05 | 0.124 | GGCGGAAGTG |
| 1 | ACCGGAAGNS | RPS3          | - | 111 | 120 | 4.53E-05 | 0.124 | GGCGGAAGTG |
| 1 | ACCGGAAGNS | RPS3A         | - | 148 | 157 | 4.53E-05 | 0.124 | GGCGGAAGTG |
| 1 | ACCGGAAGNS | NGDN          | + | 4   | 13  | 4.53E-05 | 0.124 | GGCGGAAGTG |
| 1 | ACCGGAAGNS | NECAP1        | + | 21  | 30  | 4.53E-05 | 0.124 | CGCGGAAGTG |
| 1 | ACCGGAAGNS | ERVK3-1       | + | 28  | 37  | 4.53E-05 | 0.124 | GGCGGAAGTG |
| 1 | ACCGGAAGNS | CLASRP        | + | 49  | 58  | 4.53E-05 | 0.124 | GGCGGAAGTG |
| 1 | ACCGGAAGNS | NELFE         | + | 84  | 93  | 4.53E-05 | 0.124 | GGCGGAAGTG |
| 1 | ACCGGAAGNS | LEPROTL1      | + | 92  | 101 | 4.53E-05 | 0.124 | GGCGGAAGTG |
| 1 | ACCGGAAGNS | ATAT1         | + | 97  | 106 | 4.53E-05 | 0.124 | GGCGGAAGTG |
| 1 | ACCGGAAGNS | TDG           | + | 123 | 132 | 4.53E-05 | 0.124 | GGCGGAAGTG |
| 1 | ACCGGAAGNS | TMBIM4        | + | 157 | 166 | 4.53E-05 | 0.124 | CGCGGAAGTG |
| 1 | ACCGGAAGNS | LRRC31        | + | 181 | 190 | 4.64E-05 | 0.127 | ACAGGAAGAT |
| 1 | ACCGGAAGNS | PPIB          | - | 48  | 57  | 4.79E-05 | 0.13  | ACAGGAAGGC |
| 1 | ACCGGAAGNS | TMEM179B      | - | 138 | 147 | 4.79E-05 | 0.13  | ACAGGAAGGC |
| 1 | ACCGGAAGNS | TRBV6-1       | + | 37  | 46  | 4.79E-05 | 0.13  | ACAGGAAGGC |
| 1 | ACCGGAAGNS | MTA1          | - | 8   | 17  | 4.97E-05 | 0.13  | AGAGGAAGAG |
| 1 | ACCGGAAGNS | M6PR          | - | 38  | 47  | 4.97E-05 | 0.13  | AGCGGAAGTT |
| 1 | ACCGGAAGNS | RPL17P11      | - | 57  | 66  | 4.97E-05 | 0.13  | AGAGGAAGAG |
| 1 | ACCGGAAGNS | UBL5          | - | 76  | 85  | 4.97E-05 | 0.13  | AGCGGAAGTT |

|   |            |               |   |     |     |          |       |            |
|---|------------|---------------|---|-----|-----|----------|-------|------------|
| 1 | ACCGGAAGNS | TM2D3         | - | 185 | 194 | 4.97E-05 | 0.13  | AGAGGAAGAG |
| 1 | ACCGGAAGNS | TBC1D31       | + | 32  | 41  | 4.97E-05 | 0.13  | AGAGGAAGAG |
| 1 | ACCGGAAGNS | MTPN          | + | 49  | 58  | 4.97E-05 | 0.13  | AGAGGAAGAG |
| 1 | ACCGGAAGNS | RPS6          | + | 105 | 114 | 4.97E-05 | 0.13  | AGCGGAAGTT |
| 1 | ACCGGAAGNS | CTC-260E6.6   | + | 121 | 130 | 4.97E-05 | 0.13  | AGAGGAAGAG |
| 1 | ACCGGAAGNS | RP11-454L9.2  | + | 139 | 148 | 4.97E-05 | 0.13  | AGAGGAAGAG |
| 1 | ACCGGAAGNS | RP11-436H11.5 | + | 182 | 191 | 4.97E-05 | 0.13  | AGAGGAAGAG |
| 1 | ACCGGAAGNS | TCP1          | - | 96  | 105 | 5.12E-05 | 0.132 | GACGGAAGTG |
| 1 | ACCGGAAGNS | SAP18         | + | 49  | 58  | 5.12E-05 | 0.132 | CACGGAAGTG |
| 1 | ACCGGAAGNS | RPS14         | + | 81  | 90  | 5.12E-05 | 0.132 | CACGGAAGTG |
| 1 | ACCGGAAGNS | TCEB1         | + | 103 | 112 | 5.12E-05 | 0.132 | GACGGAAGTG |
| 1 | ACCGGAAGNS | TTC1          | + | 104 | 113 | 5.12E-05 | 0.132 | GACGGAAGTG |
| 1 | ACCGGAAGNS | C16orf91      | + | 121 | 130 | 5.12E-05 | 0.132 | GACGGAAGTG |
| 1 | ACCGGAAGNS | CDC26         | + | 79  | 88  | 5.24E-05 | 0.134 | CGCGGAAGAC |
| 1 | ACCGGAAGNS | CTD-3099C6.11 | - | 26  | 35  | 5.46E-05 | 0.134 | AAAGGAAGAG |
| 1 | ACCGGAAGNS | SCOC          | - | 51  | 60  | 5.46E-05 | 0.134 | AAAGGAAGAG |
| 1 | ACCGGAAGNS | CREB3         | - | 70  | 79  | 5.46E-05 | 0.134 | AAAGGAAGAG |
| 1 | ACCGGAAGNS | RBP1          | - | 84  | 93  | 5.46E-05 | 0.134 | AAAGGAAGAG |
| 1 | ACCGGAAGNS | SLC25A5P6     | - | 87  | 96  | 5.46E-05 | 0.134 | AAAGGAAGAG |
| 1 | ACCGGAAGNS | RPL39         | - | 119 | 128 | 5.46E-05 | 0.134 | AAAGGAAGAG |
| 1 | ACCGGAAGNS | EEF1A1P42     | + | 101 | 110 | 5.46E-05 | 0.134 | AAAGGAAGAG |
| 1 | ACCGGAAGNS | CHCHD2        | + | 126 | 135 | 5.46E-05 | 0.134 | AACGGAAGTT |
| 1 | ACCGGAAGNS | ACSL1         | + | 166 | 175 | 5.46E-05 | 0.134 | AAAGGAAGAG |
| 1 | ACCGGAAGNS | VDR           | + | 179 | 188 | 5.46E-05 | 0.134 | AAAGGAAGAG |
| 1 | ACCGGAAGNS | BST2          | - | 3   | 12  | 5.61E-05 | 0.134 | CCAGGAAGTG |
| 1 | ACCGGAAGNS | RIN2          | - | 46  | 55  | 5.61E-05 | 0.134 | GCAGGAAGTG |
| 1 | ACCGGAAGNS | DCTN3         | - | 51  | 60  | 5.61E-05 | 0.134 | GCAGGAAGTG |
| 1 | ACCGGAAGNS | STRAP         | - | 64  | 73  | 5.61E-05 | 0.134 | GCAGGAAGTG |
| 1 | ACCGGAAGNS | RPS13         | - | 72  | 81  | 5.61E-05 | 0.134 | GCAGGAAGTG |
| 1 | ACCGGAAGNS | COX4I1        | - | 83  | 92  | 5.61E-05 | 0.134 | GCAGGAAGTG |

|   |            |                |   |     |     |          |       |            |
|---|------------|----------------|---|-----|-----|----------|-------|------------|
| 1 | ACCGGAAGNS | CTB-13L3.1     | - | 135 | 144 | 5.61E-05 | 0.134 | CCAGGAAGTG |
| 1 | ACCGGAAGNS | ATP6V0E1       | - | 145 | 154 | 5.61E-05 | 0.134 | CCAGGAAGTG |
| 1 | ACCGGAAGNS | SNORA62        | + | 17  | 26  | 5.61E-05 | 0.134 | CCAGGAAGTG |
| 1 | ACCGGAAGNS | SNORA6         | + | 17  | 26  | 5.61E-05 | 0.134 | CCAGGAAGTG |
| 1 | ACCGGAAGNS | RP11-1228E12.1 | + | 44  | 53  | 5.61E-05 | 0.134 | CCAGGAAGTG |
| 1 | ACCGGAAGNS | IKBKB          | + | 112 | 121 | 5.61E-05 | 0.134 | GCAGGAAGTG |
| 1 | ACCGGAAGNS | OMA1           | + | 132 | 141 | 5.61E-05 | 0.134 | GCAGGAAGTG |
| 1 | ACCGGAAGNS | RPL37          | + | 158 | 167 | 5.61E-05 | 0.134 | GCAGGAAGTG |
| 1 | ACCGGAAGNS | DLGAP4-AS1     | + | 162 | 171 | 5.61E-05 | 0.134 | GCAGGAAGTG |
| 1 | ACCGGAAGNS | MINOS1         | + | 189 | 198 | 5.61E-05 | 0.134 | GCAGGAAGTG |
| 1 | ACCGGAAGNS | SDHAF2         | - | 13  | 22  | 5.86E-05 | 0.135 | GCCGGAAGGT |
| 1 | ACCGGAAGNS | CHMP2A         | - | 79  | 88  | 5.86E-05 | 0.135 | CCCGGAAGGT |
| 1 | ACCGGAAGNS | TIMM23         | - | 91  | 100 | 5.86E-05 | 0.135 | CCCGGAAGCT |
| 1 | ACCGGAAGNS | VPS25          | - | 114 | 123 | 5.86E-05 | 0.135 | CCCGGAAGCT |
| 1 | ACCGGAAGNS | TMEM126A       | + | 16  | 25  | 5.86E-05 | 0.135 | GCCGGAAGCT |
| 1 | ACCGGAAGNS | TMEM251        | + | 40  | 49  | 5.86E-05 | 0.135 | GCCGGAAGCT |
| 1 | ACCGGAAGNS | MARS2          | + | 48  | 57  | 5.86E-05 | 0.135 | GCCGGAAGCT |
| 1 | ACCGGAAGNS | NDUFB7         | + | 72  | 81  | 5.86E-05 | 0.135 | CCCGGAAGCT |
| 1 | ACCGGAAGNS | SFSWAP         | + | 89  | 98  | 5.86E-05 | 0.135 | GCCGGAAGCT |
| 1 | ACCGGAAGNS | C6orf99        | + | 90  | 99  | 5.86E-05 | 0.135 | CCCGGAAGGT |
| 1 | ACCGGAAGNS | RPL11          | + | 111 | 120 | 5.86E-05 | 0.135 | GCCGGAAGCT |
| 1 | ACCGGAAGNS | TIMM23         | + | 149 | 158 | 5.86E-05 | 0.135 | CCCGGAAGGT |
| 1 | ACCGGAAGNS | RPL13AP5       | + | 189 | 198 | 5.86E-05 | 0.135 | GCCGGAAGGT |
| 1 | ACCGGAAGNS | RAD51-AS1      | - | 11  | 20  | 6.21E-05 | 0.136 | GGCGGAAGCG |
| 1 | ACCGGAAGNS | ATXN2L         | - | 31  | 40  | 6.21E-05 | 0.136 | GGCGGAAGGG |
| 1 | ACCGGAAGNS | M6PR           | - | 44  | 53  | 6.21E-05 | 0.136 | GGCGGAAGCG |
| 1 | ACCGGAAGNS | HSD17B10       | - | 51  | 60  | 6.21E-05 | 0.136 | GGCGGAAGGG |
| 1 | ACCGGAAGNS | TMEM141        | - | 69  | 78  | 6.21E-05 | 0.136 | GGCGGAAGGG |
| 1 | ACCGGAAGNS | ASNS           | - | 82  | 91  | 6.21E-05 | 0.136 | GGCGGAAGGG |
| 1 | ACCGGAAGNS | C11orf49       | - | 121 | 130 | 6.21E-05 | 0.136 | GGCGGAAGGG |

|   |            |              |   |     |     |          |       |            |
|---|------------|--------------|---|-----|-----|----------|-------|------------|
| 1 | ACCGGAAGNS | XPNPEP1      | - | 157 | 166 | 6.21E-05 | 0.136 | CGCGGAAGGG |
| 1 | ACCGGAAGNS | RP4-761J14.8 | - | 192 | 201 | 6.21E-05 | 0.136 | GGCGGAAGCG |
| 1 | ACCGGAAGNS | MACF1        | + | 34  | 43  | 6.21E-05 | 0.136 | GGCGGAAGCG |
| 1 | ACCGGAAGNS | EP400        | + | 51  | 60  | 6.21E-05 | 0.136 | CGCGGAAGCG |
| 1 | ACCGGAAGNS | SMG6         | + | 54  | 63  | 6.21E-05 | 0.136 | GGCGGAAGGG |
| 1 | ACCGGAAGNS | MCM6         | + | 62  | 71  | 6.21E-05 | 0.136 | GGCGGAAGCG |
| 1 | ACCGGAAGNS | UTP6         | + | 92  | 101 | 6.21E-05 | 0.136 | GGCGGAAGCG |
| 1 | ACCGGAAGNS | MTX2         | + | 109 | 118 | 6.21E-05 | 0.136 | GGCGGAAGCG |
| 1 | ACCGGAAGNS | ADSS         | + | 121 | 130 | 6.21E-05 | 0.136 | CGCGGAAGGG |
| 1 | ACCGGAAGNS | DPM3         | + | 124 | 133 | 6.21E-05 | 0.136 | CGCGGAAGCG |
| 1 | ACCGGAAGNS | CHERP        | + | 131 | 140 | 6.21E-05 | 0.136 | GGCGGAAGCG |
| 1 | ACCGGAAGNS | FBXW4P1      | + | 173 | 182 | 6.21E-05 | 0.136 | GGCGGAAGGG |
| 1 | ACCGGAAGNS | DOCK5        | + | 184 | 193 | 6.21E-05 | 0.136 | GGCGGAAGCG |
| 1 | ACCGGAAGNS | RPL34        | - | 54  | 63  | 6.32E-05 | 0.138 | ACAGGAAGTT |
| 1 | ACCGGAAGNS | RPS11        | - | 112 | 121 | 6.41E-05 | 0.139 | AGAGGAAGTG |
| 1 | ACCGGAAGNS | BAZ2A        | - | 159 | 168 | 6.41E-05 | 0.139 | AGAGGAAGTG |
| 1 | ACCGGAAGNS | NTS          | + | 135 | 144 | 6.41E-05 | 0.139 | AGAGGAAGTG |
| 1 | ACCGGAAGNS | MDH1         | + | 42  | 51  | 6.56E-05 | 0.142 | AGCGGAAGGT |
| 1 | ACCGGAAGNS | MIR6838      | - | 92  | 101 | 6.71E-05 | 0.143 | GCAGGAAGAC |
| 1 | ACCGGAAGNS | RP11-266L9.6 | - | 103 | 112 | 6.71E-05 | 0.143 | CCAGGAAGAC |
| 1 | ACCGGAAGNS | MIR6859-1    | - | 182 | 191 | 6.71E-05 | 0.143 | CCAGGAAGAC |
| 1 | ACCGGAAGNS | TIMM21       | + | 92  | 101 | 6.71E-05 | 0.143 | CCAGGAAGAC |
| 1 | ACCGGAAGNS | RPL7AP15     | + | 162 | 171 | 6.71E-05 | 0.143 | GCAGGAAGAC |
| 1 | ACCGGAAGNS | ARL14EP      | - | 48  | 57  | 6.95E-05 | 0.146 | GACGGAAGGG |
| 1 | ACCGGAAGNS | RARS         | - | 116 | 125 | 6.95E-05 | 0.146 | GACGGAAGCG |
| 1 | ACCGGAAGNS | COBL         | - | 125 | 134 | 6.95E-05 | 0.146 | GACGGAAGGG |
| 1 | ACCGGAAGNS | DYNLT1       | + | 176 | 185 | 6.95E-05 | 0.146 | GACGGAAGGG |
| 1 | ACCGGAAGNS | ATXN10       | - | 7   | 16  | 7.08E-05 | 0.146 | GGCGGAAGTC |
| 1 | ACCGGAAGNS | SNORD105B    | - | 38  | 47  | 7.08E-05 | 0.146 | GGCGGAAGTC |
| 1 | ACCGGAAGNS | COX8A        | - | 55  | 64  | 7.08E-05 | 0.146 | CGCGGAAGTC |

|   |            |                  |   |     |     |          |       |            |
|---|------------|------------------|---|-----|-----|----------|-------|------------|
| 1 | ACCGGAAGNS | PSMA4            | - | 71  | 80  | 7.08E-05 | 0.146 | CGCGGAAGTC |
| 1 | ACCGGAAGNS | TCTE3            | - | 79  | 88  | 7.08E-05 | 0.146 | GGCGGAAGTC |
| 1 | ACCGGAAGNS | PSMC1            | - | 133 | 142 | 7.08E-05 | 0.146 | GGCGGAAGTC |
| 1 | ACCGGAAGNS | UNC50            | + | 64  | 73  | 7.08E-05 | 0.146 | GGCGGAAGTC |
| 1 | ACCGGAAGNS | CIAPIN1          | + | 89  | 98  | 7.08E-05 | 0.146 | GGCGGAAGTC |
| 1 | ACCGGAAGNS | TMEM199          | + | 103 | 112 | 7.08E-05 | 0.146 | GGCGGAAGTC |
| 1 | ACCGGAAGNS | SLC9B1           | + | 118 | 127 | 7.08E-05 | 0.146 | CGCGGAAGTC |
| 1 | ACCGGAAGNS | XXbac-B476C20.11 | - | 25  | 34  | 7.19E-05 | 0.146 | AAAGGAAGTG |
| 1 | ACCGGAAGNS | CELA2B           | - | 32  | 41  | 7.19E-05 | 0.146 | AAAGGAAGTG |
| 1 | ACCGGAAGNS | RPS3             | - | 128 | 137 | 7.19E-05 | 0.146 | AAAGGAAGTG |
| 1 | ACCGGAAGNS | RPL18A           | - | 141 | 150 | 7.19E-05 | 0.146 | AAAGGAAGTG |
| 1 | ACCGGAAGNS | FEN1             | + | 1   | 10  | 7.19E-05 | 0.146 | AAAGGAAGTG |
| 1 | ACCGGAAGNS | COX16            | + | 35  | 44  | 7.19E-05 | 0.146 | AAAGGAAGTG |
| 1 | ACCGGAAGNS | SC5D             | + | 53  | 62  | 7.19E-05 | 0.146 | AAAGGAAGTG |
| 1 | ACCGGAAGNS | CTD-2357A8.2     | + | 128 | 137 | 7.19E-05 | 0.146 | AAAGGAAGTG |
| 1 | ACCGGAAGNS | SSBP3            | - | 13  | 22  | 7.70E-05 | 0.147 | GCAGGAAGGG |
| 1 | ACCGGAAGNS | MUC12            | - | 24  | 33  | 7.70E-05 | 0.147 | CCAGGAAGGG |
| 1 | ACCGGAAGNS | SETD1B           | - | 57  | 66  | 7.70E-05 | 0.147 | CCAGGAAGGG |
| 1 | ACCGGAAGNS | RNU4ATAC         | - | 65  | 74  | 7.70E-05 | 0.147 | GCAGGAAGCG |
| 1 | ACCGGAAGNS | TMEM179B         | - | 67  | 76  | 7.70E-05 | 0.147 | CCAGGAAGCG |
| 1 | ACCGGAAGNS | TLN2             | - | 68  | 77  | 7.70E-05 | 0.147 | GCAGGAAGCG |
| 1 | ACCGGAAGNS | SNORA71A         | - | 72  | 81  | 7.70E-05 | 0.147 | CCAGGAAGGG |
| 1 | ACCGGAAGNS | RPS7             | - | 93  | 102 | 7.70E-05 | 0.147 | CCAGGAAGCG |
| 1 | ACCGGAAGNS | POM121           | - | 101 | 110 | 7.70E-05 | 0.147 | GCAGGAAGCG |
| 1 | ACCGGAAGNS | C11orf31         | - | 146 | 155 | 7.70E-05 | 0.147 | GCAGGAAGGG |
| 1 | ACCGGAAGNS | DBI              | - | 166 | 175 | 7.70E-05 | 0.147 | CCAGGAAGCG |
| 1 | ACCGGAAGNS | ACTBP9           | - | 169 | 178 | 7.70E-05 | 0.147 | AGAGGAAGAC |
| 1 | ACCGGAAGNS | GLA              | - | 171 | 180 | 7.70E-05 | 0.147 | CCAGGAAGCG |
| 1 | ACCGGAAGNS | DAPK1            | - | 183 | 192 | 7.70E-05 | 0.147 | GCAGGAAGGG |
| 1 | ACCGGAAGNS | ZYX              | - | 192 | 201 | 7.70E-05 | 0.147 | CCAGGAAGGG |

|   |            |               |   |     |     |          |       |            |
|---|------------|---------------|---|-----|-----|----------|-------|------------|
| 1 | ACCGGAAGNS | SNHG3         | + | 7   | 16  | 7.70E-05 | 0.147 | CCAGGAAGGG |
| 1 | ACCGGAAGNS | ASGR1         | + | 29  | 38  | 7.70E-05 | 0.147 | GCAGGAAGCG |
| 1 | ACCGGAAGNS | GMNN          | + | 41  | 50  | 7.70E-05 | 0.147 | GCAGGAAGGG |
| 1 | ACCGGAAGNS | SHFM1         | + | 46  | 55  | 7.70E-05 | 0.147 | GCAGGAAGCG |
| 1 | ACCGGAAGNS | PRSS48        | + | 69  | 78  | 7.70E-05 | 0.147 | GCAGGAAGCG |
| 1 | ACCGGAAGNS | SARS          | + | 74  | 83  | 7.70E-05 | 0.147 | GCAGGAAGGG |
| 1 | ACCGGAAGNS | SNRPF         | + | 75  | 84  | 7.70E-05 | 0.147 | GCAGGAAGGG |
| 1 | ACCGGAAGNS | C14orf142     | + | 84  | 93  | 7.70E-05 | 0.147 | GCAGGAAGGG |
| 1 | ACCGGAAGNS | FBXW4P1       | + | 84  | 93  | 7.70E-05 | 0.147 | GCAGGAAGGG |
| 1 | ACCGGAAGNS | TPM3P9        | + | 104 | 113 | 7.70E-05 | 0.147 | CCAGGAAGCG |
| 1 | ACCGGAAGNS | ZBTB7A        | + | 154 | 163 | 7.70E-05 | 0.147 | CCAGGAAGGG |
| 1 | ACCGGAAGNS | CTD-2561B21.8 | + | 162 | 171 | 7.70E-05 | 0.147 | CCAGGAAGCG |
| 1 | ACCGGAAGNS | DHX9          | + | 172 | 181 | 7.70E-05 | 0.147 | CCAGGAAGCG |
| 1 | ACCGGAAGNS | MIR6838       | + | 180 | 189 | 7.70E-05 | 0.147 | AGAGGAAGAC |
| 1 | ACCGGAAGNS | MIR6838       | + | 132 | 141 | 7.85E-05 | 0.149 | CACGGAAGTC |
| 1 | ACCGGAAGNS | RP11-371E8.4  | + | 53  | 62  | 8.03E-05 | 0.152 | ACAGGAAGGT |
| 1 | ACCGGAAGNS | WDR83         | + | 65  | 74  | 8.03E-05 | 0.152 | ACAGGAAGGT |
| 1 | ACCGGAAGNS | TMEM251       | + | 97  | 106 | 8.03E-05 | 0.152 | ACAGGAAGGT |
| 1 | ACCGGAAGNS | EIF4A1P11     | - | 11  | 20  | 8.29E-05 | 0.153 | AAAGGAAGAC |
| 1 | ACCGGAAGNS | SH3GL1P1      | - | 27  | 36  | 8.29E-05 | 0.153 | AGAGGAAGGG |
| 1 | ACCGGAAGNS | LINC01609     | - | 27  | 36  | 8.29E-05 | 0.153 | AGAGGAAGGG |
| 1 | ACCGGAAGNS | SEMA4G        | - | 96  | 105 | 8.29E-05 | 0.153 | AGAGGAAGGG |
| 1 | ACCGGAAGNS | SCOCP1        | - | 133 | 142 | 8.29E-05 | 0.153 | AGAGGAAGGG |
| 1 | ACCGGAAGNS | CTD-2373N4.5  | - | 152 | 161 | 8.29E-05 | 0.153 | AAAGGAAGAC |
| 1 | ACCGGAAGNS | RP11-697E2.6  | + | 1   | 10  | 8.29E-05 | 0.153 | AGAGGAAGCG |
| 1 | ACCGGAAGNS | RC3H1         | + | 25  | 34  | 8.29E-05 | 0.153 | AGAGGAAGGG |
| 1 | ACCGGAAGNS | RPS13         | + | 48  | 57  | 8.29E-05 | 0.153 | AGAGGAAGCG |
| 1 | ACCGGAAGNS | NME1          | + | 67  | 76  | 8.29E-05 | 0.153 | AGAGGAAGCG |
| 1 | ACCGGAAGNS | FBXW4P1       | + | 125 | 134 | 8.29E-05 | 0.153 | AGAGGAAGGG |
| 1 | ACCGGAAGNS | ILF2          | + | 177 | 186 | 8.29E-05 | 0.153 | AGAGGAAGGG |



|   |            |               |   |     |     |          |       |            |
|---|------------|---------------|---|-----|-----|----------|-------|------------|
| 1 | ACCGGAAGNS | ATP6V1E1      | - | 15  | 24  | 8.44E-05 | 0.153 | CCAGGAAGTC |
| 1 | ACCGGAAGNS | CCL15-CCL14   | - | 17  | 26  | 8.44E-05 | 0.153 | CCAGGAAGTC |
| 1 | ACCGGAAGNS | MRPS22        | - | 41  | 50  | 8.44E-05 | 0.153 | GCAGGAAGTC |
| 1 | ACCGGAAGNS | SLC25A5P6     | - | 130 | 139 | 8.44E-05 | 0.153 | CCAGGAAGTC |
| 1 | ACCGGAAGNS | ZDHHC4        | + | 115 | 124 | 8.44E-05 | 0.153 | GCAGGAAGTC |
| 1 | ACCGGAAGNS | PAXBP1-AS1    | + | 8   | 17  | 8.59E-05 | 0.153 | GGCGGAAGAT |
| 1 | ACCGGAAGNS | RP11-156P1.3  | + | 118 | 127 | 8.59E-05 | 0.153 | GGCGGAAGAT |
| 1 | ACCGGAAGNS | CTD-2154B17.4 | - | 15  | 24  | 8.79E-05 | 0.153 | CGCGGAAGCC |
| 1 | ACCGGAAGNS | METTL12       | - | 22  | 31  | 8.79E-05 | 0.153 | CGCGGAAGGC |
| 1 | ACCGGAAGNS | PPIB          | - | 34  | 43  | 8.79E-05 | 0.153 | GGCGGAAGGC |
| 1 | ACCGGAAGNS | ATP5E         | - | 42  | 51  | 8.79E-05 | 0.153 | CGCGGAAGCC |
| 1 | ACCGGAAGNS | KIZ           | - | 63  | 72  | 8.79E-05 | 0.153 | GGCGGAAGCC |
| 1 | ACCGGAAGNS | MSL3P1        | - | 87  | 96  | 8.79E-05 | 0.153 | GGCGGAAGCC |
| 1 | ACCGGAAGNS | KBTBD7        | - | 144 | 153 | 8.79E-05 | 0.153 | CGCGGAAGCC |
| 1 | ACCGGAAGNS | RNF7          | - | 186 | 195 | 8.79E-05 | 0.153 | GGCGGAAGGC |
| 1 | ACCGGAAGNS | RPL10         | + | 10  | 19  | 8.79E-05 | 0.153 | CGCGGAAGGC |
| 1 | ACCGGAAGNS | TMEM59        | + | 27  | 36  | 8.79E-05 | 0.153 | GGCGGAAGGC |
| 1 | ACCGGAAGNS | DNMBP         | + | 33  | 42  | 8.79E-05 | 0.153 | GGCGGAAGCC |
| 1 | ACCGGAAGNS | MAST3         | + | 60  | 69  | 8.79E-05 | 0.153 | GGCGGAAGGC |
| 1 | ACCGGAAGNS | LINC00939     | + | 69  | 78  | 8.79E-05 | 0.153 | GGCGGAAGCC |
| 1 | ACCGGAAGNS | TMEM223       | + | 77  | 86  | 8.79E-05 | 0.153 | GGCGGAAGGC |
| 1 | ACCGGAAGNS | TRIM8         | + | 80  | 89  | 8.79E-05 | 0.153 | CGCGGAAGGC |
| 1 | ACCGGAAGNS | ALG6          | + | 99  | 108 | 8.79E-05 | 0.153 | GGCGGAAGGC |
| 1 | ACCGGAAGNS | MSRB1         | + | 131 | 140 | 8.79E-05 | 0.153 | GGCGGAAGCC |
| 1 | ACCGGAAGNS | SLC25A20      | + | 134 | 143 | 8.79E-05 | 0.153 | GGCGGAAGCC |
| 1 | ACCGGAAGNS | CHCHD1        | + | 176 | 185 | 8.79E-05 | 0.153 | CGCGGAAGCC |
| 1 | ACCGGAAGNS | PSAP          | - | 39  | 48  | 8.98E-05 | 0.154 | AAAGGAAGGG |
| 1 | ACCGGAAGNS | ZBTB4         | - | 49  | 58  | 8.98E-05 | 0.154 | AAAGGAAGGG |
| 1 | ACCGGAAGNS | SLC34A2       | - | 62  | 71  | 8.98E-05 | 0.154 | AAAGGAAGGG |
| 1 | ACCGGAAGNS | ST6GALNAC1    | - | 76  | 85  | 8.98E-05 | 0.154 | AAAGGAAGGG |

|   |            |                |   |     |     |          |       |            |
|---|------------|----------------|---|-----|-----|----------|-------|------------|
| 1 | ACCGGAAGNS | DDX50          | - | 133 | 142 | 8.98E-05 | 0.154 | AAAGGAAGCG |
| 1 | ACCGGAAGNS | RP11-474I11.8  | + | 17  | 26  | 8.98E-05 | 0.154 | AAAGGAAGGG |
| 1 | ACCGGAAGNS | NUDT5          | + | 40  | 49  | 8.98E-05 | 0.154 | AAAGGAAGCG |
| 1 | ACCGGAAGNS | CD14           | + | 53  | 62  | 8.98E-05 | 0.154 | AAAGGAAGGG |
| 1 | ACCGGAAGNS | MIR6124        | + | 114 | 123 | 8.98E-05 | 0.154 | AAAGGAAGGG |
| 1 | ACCGGAAGNS | RPL24          | + | 14  | 23  | 9.07E-05 | 0.154 | AGAGGAAGTC |
| 1 | ACCGGAAGNS | AJ271736.10    | + | 18  | 27  | 9.07E-05 | 0.154 | AGAGGAAGTC |
| 1 | ACCGGAAGNS | Z84812.4       | + | 18  | 27  | 9.07E-05 | 0.154 | AGAGGAAGTC |
| 1 | ACCGGAAGNS | HNRNPUL1       | + | 130 | 139 | 9.07E-05 | 0.154 | AGAGGAAGTC |
| 1 | ACCGGAAGNS | NDUFA7         | + | 31  | 40  | 9.25E-05 | 0.157 | GACGGAAGAT |
| 1 | ACCGGAAGNS | RP11-384K6.6   | - | 5   | 14  | 9.49E-05 | 0.16  | CACGGAAGCC |
| 1 | ACCGGAAGNS | RP11-206L10.2  | - | 24  | 33  | 9.49E-05 | 0.16  | CACGGAAGGC |
| 1 | ACCGGAAGNS | IFT52          | - | 65  | 74  | 9.49E-05 | 0.16  | CACGGAAGGC |
| 1 | ACCGGAAGNS | SMAD3          | - | 181 | 190 | 9.49E-05 | 0.16  | CACGGAAGGC |
| 1 | ACCGGAAGNS | UPK3BP1        | + | 42  | 51  | 9.49E-05 | 0.16  | CACGGAAGGC |
| 1 | ACCGGAAGNS | NHP2           | - | 124 | 133 | 9.60E-05 | 0.161 | AAAGGAAGTC |
| 1 | ACCGGAAGNS | LINC00998      | + | 5   | 14  | 9.60E-05 | 0.161 | AAAGGAAGTC |
| 1 | ACCGGAAGNS | ATP5E          | - | 146 | 155 | 9.79E-05 | 0.163 | GCAGGAAGAT |
| 1 | ACCGGAAGNS | RP11-1060J15.4 | + | 83  | 92  | 9.79E-05 | 0.163 | GCAGGAAGAT |
| 1 | ACCGGAAGNS | TCF3           | + | 108 | 117 | 9.79E-05 | 0.163 | GCAGGAAGAT |

**Supplementary Table 10. FIMO motif scanning using JASPAR motif matrices using default p-value cutoff 1e-4 (NRF1)**

| NRF1 motif | Alt ID       | Sequence Name | Strand | Start | End | p-value  | q-value | Matched Sequence |
|------------|--------------|---------------|--------|-------|-----|----------|---------|------------------|
| 1          | GCGCVTGCG CV | HNRNPA1       | +      | 2     | 12  | 1.13E-07 | 0.00218 | GCGCCTGCGC A     |
| 1          | GCGCVTGCG CV | EIF3K         | +      | 4     | 14  | 1.13E-07 | 0.00218 | GCGCCTGCGC A     |
| 1          | GCGCVTGCG CV | PRDX5         | +      | 5     | 15  | 1.13E-07 | 0.00218 | GCGCCTGCGC A     |
| 1          | GCGCVTGCG CV | RP1-101K10.6  | +      | 28    | 38  | 1.13E-07 | 0.00218 | GCGCCTGCGC A     |
| 1          | GCGCVTGCG CV | PATL1         | +      | 33    | 43  | 1.13E-07 | 0.00218 | GCGCCTGCGC A     |
| 1          | GCGCVTGCG CV | LSM2          | +      | 42    | 52  | 1.13E-07 | 0.00218 | GCGCCTGCGC A     |
| 1          | GCGCVTGCG CV | TBC1D17       | +      | 60    | 70  | 1.13E-07 | 0.00218 | GCGCCTGCGC A     |
| 1          | GCGCVTGCG CV | KDM2A         | +      | 60    | 70  | 1.13E-07 | 0.00218 | GCGCCTGCGC A     |
| 1          | GCGCVTGCG CV | RP11-307E17.8 | +      | 65    | 75  | 1.13E-07 | 0.00218 | GCGCCTGCGC A     |
| 1          | GCGCVTGCG CV | SARS          | +      | 66    | 76  | 1.13E-07 | 0.00218 | GCGCCTGCGC A     |
| 1          | GCGCVTGCG CV | MINK1         | +      | 69    | 79  | 1.13E-07 | 0.00218 | GCGCCTGCGC A     |
| 1          | GCGCVTGCG CV | EED           | +      | 70    | 80  | 1.13E-07 | 0.00218 | GCGCCTGCGC A     |
| 1          | GCGCVTGCG CV | DYNLT1        | +      | 77    | 87  | 1.13E-07 | 0.00218 | GCGCCTGCGC A     |
| 1          | GCGCVTGCG CV | DAD1          | +      | 78    | 88  | 1.13E-07 | 0.00218 | GCGCCTGCGC A     |
| 1          | GCGCVTGCG CV | TMEM141       | +      | 80    | 90  | 1.13E-07 | 0.00218 | GCGCCTGCGC A     |
| 1          | GCGCVTGCG CV | FUNDC1        | +      | 84    | 94  | 1.13E-07 | 0.00218 | GCGCCTGCGC A     |
| 1          | GCGCVTGCG CV | TOMM7         | +      | 90    | 100 | 1.13E-07 | 0.00218 | GCGCCTGCGC A     |
| 1          | GCGCVTGCG CV | RPL5          | +      | 94    | 104 | 1.13E-07 | 0.00218 | GCGCCTGCGC A     |
| 1          | GCGCVTGCG CV | ZNF627        | +      | 112   | 122 | 1.13E-07 | 0.00218 | GCGCCTGCGC A     |
| 1          | GCGCVTGCG CV | UQCR11        | +      | 119   | 129 | 1.13E-07 | 0.00218 | GCGCCTGCGC A     |
| 1          | GCGCVTGCG CV | OMA1          | +      | 149   | 159 | 1.13E-07 | 0.00218 | GCGCCTGCGC A     |
| 1          | GCGCVTGCG CV | BRK1          | +      | 176   | 186 | 1.13E-07 | 0.00218 | GCGCCTGCGC A     |
| 1          | GCGCVTGCG CV | AC024560.3    | -      | 1     | 11  | 1.13E-07 | 0.00218 | GCGCCTGCGC A     |
| 1          | GCGCVTGCG CV | RABGGTB       | -      | 10    | 20  | 1.13E-07 | 0.00218 | GCGCCTGCGC A     |
| 1          | GCGCVTGCG CV | GTF2F2        | -      | 52    | 62  | 1.13E-07 | 0.00218 | GCGCCTGCGC A     |

|   |                 |              |   |     |     |              |             |                 |
|---|-----------------|--------------|---|-----|-----|--------------|-------------|-----------------|
| 1 | GCGCVTGCG<br>CV | AC024560.3   | - | 53  | 63  | 1.13E-<br>07 | 0.0021<br>8 | GCGCCTGCGC<br>A |
| 1 | GCGCVTGCG<br>CV | CNIH1        | - | 56  | 66  | 1.13E-<br>07 | 0.0021<br>8 | GCGCCTGCGC<br>A |
| 1 | GCGCVTGCG<br>CV | GTF2I        | - | 57  | 67  | 1.13E-<br>07 | 0.0021<br>8 | GCGCCTGCGC<br>A |
| 1 | GCGCVTGCG<br>CV | BCCIP        | - | 87  | 97  | 1.13E-<br>07 | 0.0021<br>8 | GCGCCTGCGC<br>A |
| 1 | GCGCVTGCG<br>CV | SLX4         | - | 90  | 100 | 1.13E-<br>07 | 0.0021<br>8 | GCGCCTGCGC<br>A |
| 1 | GCGCVTGCG<br>CV | ZNF483       | - | 98  | 108 | 1.13E-<br>07 | 0.0021<br>8 | GCGCCTGCGC<br>A |
| 1 | GCGCVTGCG<br>CV | AC024560.3   | - | 103 | 113 | 1.13E-<br>07 | 0.0021<br>8 | GCGCCTGCGC<br>A |
| 1 | GCGCVTGCG<br>CV | COPB2        | - | 108 | 118 | 1.13E-<br>07 | 0.0021<br>8 | GCGCCTGCGC<br>A |
| 1 | GCGCVTGCG<br>CV | RBX1         | - | 110 | 120 | 1.13E-<br>07 | 0.0021<br>8 | GCGCCTGCGC<br>A |
| 1 | GCGCVTGCG<br>CV | TM2D3        | - | 113 | 123 | 1.13E-<br>07 | 0.0021<br>8 | GCGCCTGCGC<br>A |
| 1 | GCGCVTGCG<br>CV | RPS15        | - | 124 | 134 | 1.13E-<br>07 | 0.0021<br>8 | GCGCCTGCGC<br>A |
| 1 | GCGCVTGCG<br>CV | PDRG1        | - | 127 | 137 | 1.13E-<br>07 | 0.0021<br>8 | GCGCCTGCGC<br>A |
| 1 | GCGCVTGCG<br>CV | NDUFA8       | - | 130 | 140 | 1.13E-<br>07 | 0.0021<br>8 | GCGCCTGCGC<br>A |
| 1 | GCGCVTGCG<br>CV | TCTE3        | + | 5   | 15  | 2.07E-<br>07 | 0.0026<br>4 | GCGCCTGCGC<br>G |
| 1 | GCGCVTGCG<br>CV | CANX         | + | 5   | 15  | 2.07E-<br>07 | 0.0026<br>4 | GCGCCTGCGC<br>G |
| 1 | GCGCVTGCG<br>CV | RP1-122P22.4 | + | 10  | 20  | 2.07E-<br>07 | 0.0026<br>4 | GCGCCTGCGC<br>G |
| 1 | GCGCVTGCG<br>CV | CSTF1        | - | 12  | 22  | 2.07E-<br>07 | 0.0026<br>4 | GCGCCTGCGC<br>G |
| 1 | GCGCVTGCG<br>CV | RPS23        | + | 27  | 37  | 2.07E-<br>07 | 0.0026<br>4 | GCGCCTGCGC<br>G |
| 1 | GCGCVTGCG<br>CV | UXS1         | + | 35  | 45  | 2.07E-<br>07 | 0.0026<br>4 | GCGCCTGCGC<br>G |
| 1 | GCGCVTGCG<br>CV | MRPL14       | - | 26  | 36  | 2.07E-<br>07 | 0.0026<br>4 | GCGCCTGCGC<br>G |
| 1 | GCGCVTGCG<br>CV | GMNN         | - | 32  | 42  | 2.07E-<br>07 | 0.0026<br>4 | GCGCCTGCGC<br>G |
| 1 | GCGCVTGCG<br>CV | NEIL2        | + | 44  | 54  | 2.07E-<br>07 | 0.0026<br>4 | GCGCCTGCGC<br>G |
| 1 | GCGCVTGCG<br>CV | SLX4         | + | 46  | 56  | 2.07E-<br>07 | 0.0026<br>4 | GCGCCTGCGC<br>G |
| 1 | GCGCVTGCG<br>CV | NDUFB4       | - | 64  | 74  | 2.07E-<br>07 | 0.0026<br>4 | GCGCCTGCGC<br>G |
| 1 | GCGCVTGCG<br>CV | FAM220A      | - | 84  | 94  | 2.07E-<br>07 | 0.0026<br>4 | GCGCCTGCGC<br>G |
| 1 | GCGCVTGCG<br>CV | JAGN1        | + | 95  | 105 | 2.07E-<br>07 | 0.0026<br>4 | GCGCCTGCGC<br>G |
| 1 | GCGCVTGCG<br>CV | PSAP         | - | 86  | 96  | 2.07E-<br>07 | 0.0026<br>4 | GCGCCTGCGC<br>G |

|   |                 |             |   |     |     |              |             |                 |
|---|-----------------|-------------|---|-----|-----|--------------|-------------|-----------------|
| 1 | GCGCVTGCG<br>CV | LRRC75A-AS1 | - | 96  | 106 | 2.07E-<br>07 | 0.0026<br>4 | GCGCCTGCGC<br>G |
| 1 | GCGCVTGCG<br>CV | TMEM106C    | + | 119 | 129 | 2.07E-<br>07 | 0.0026<br>4 | GCGCCTGCGC<br>G |
| 1 | GCGCVTGCG<br>CV | NDUFB4      | - | 119 | 129 | 2.07E-<br>07 | 0.0026<br>4 | GCGCCTGCGC<br>G |
| 1 | GCGCVTGCG<br>CV | UBE2T       | - | 125 | 135 | 2.07E-<br>07 | 0.0026<br>4 | GCGCCTGCGC<br>G |
| 1 | GCGCVTGCG<br>CV | WRB         | - | 162 | 172 | 2.07E-<br>07 | 0.0026<br>4 | GCGCCTGCGC<br>G |
| 1 | GCGCVTGCG<br>CV | MED18       | - | 11  | 21  | 3.45E-<br>07 | 0.0031<br>4 | GCGCATGCGC<br>A |
| 1 | GCGCVTGCG<br>CV | CHMP2A      | - | 13  | 23  | 3.45E-<br>07 | 0.0031<br>4 | GCGCATGCGC<br>A |
| 1 | GCGCVTGCG<br>CV | CKLF        | - | 14  | 24  | 3.45E-<br>07 | 0.0031<br>4 | GCGCATGCGC<br>A |
| 1 | GCGCVTGCG<br>CV | TEKT4P2     | - | 64  | 74  | 3.45E-<br>07 | 0.0031<br>4 | GCGCATGCGC<br>A |
| 1 | GCGCVTGCG<br>CV | MARS2       | - | 73  | 83  | 3.45E-<br>07 | 0.0031<br>4 | GCGCATGCGC<br>A |
| 1 | GCGCVTGCG<br>CV | MRPL17      | - | 80  | 90  | 3.45E-<br>07 | 0.0031<br>4 | GCGCATGCGC<br>A |
| 1 | GCGCVTGCG<br>CV | UROS        | - | 88  | 98  | 3.45E-<br>07 | 0.0031<br>4 | GCGCATGCGC<br>A |
| 1 | GCGCVTGCG<br>CV | PSMA4       | - | 122 | 132 | 3.45E-<br>07 | 0.0031<br>4 | GCGCATGCGC<br>A |
| 1 | GCGCVTGCG<br>CV | NDUFA8      | - | 124 | 134 | 3.45E-<br>07 | 0.0031<br>4 | GCGCATGCGC<br>A |
| 1 | GCGCVTGCG<br>CV | DAD1        | - | 128 | 138 | 3.45E-<br>07 | 0.0031<br>4 | GCGCATGCGC<br>A |
| 1 | GCGCVTGCG<br>CV | ELP6        | - | 155 | 165 | 3.45E-<br>07 | 0.0031<br>4 | GCGCATGCGC<br>A |
| 1 | GCGCVTGCG<br>CV | TIMM8B      | + | 27  | 37  | 3.45E-<br>07 | 0.0031<br>4 | GCGCATGCGC<br>A |
| 1 | GCGCVTGCG<br>CV | GTF2IP1     | + | 53  | 63  | 3.45E-<br>07 | 0.0031<br>4 | GCGCATGCGC<br>A |
| 1 | GCGCVTGCG<br>CV | GTF2IP4     | + | 53  | 63  | 3.45E-<br>07 | 0.0031<br>4 | GCGCATGCGC<br>A |
| 1 | GCGCVTGCG<br>CV | GATS        | + | 56  | 66  | 3.45E-<br>07 | 0.0031<br>4 | GCGCATGCGC<br>A |
| 1 | GCGCVTGCG<br>CV | RPL10A      | + | 74  | 84  | 3.45E-<br>07 | 0.0031<br>4 | GCGCATGCGC<br>A |
| 1 | GCGCVTGCG<br>CV | NNAT        | + | 78  | 88  | 3.45E-<br>07 | 0.0031<br>4 | GCGCATGCGC<br>A |
| 1 | GCGCVTGCG<br>CV | MRPL17      | + | 81  | 91  | 3.45E-<br>07 | 0.0031<br>4 | GCGCATGCGC<br>A |
| 1 | GCGCVTGCG<br>CV | SLX4        | + | 85  | 95  | 3.45E-<br>07 | 0.0031<br>4 | GCGCATGCGC<br>A |
| 1 | GCGCVTGCG<br>CV | USO1        | + | 98  | 108 | 3.45E-<br>07 | 0.0031<br>4 | GCGCATGCGC<br>A |
| 1 | GCGCVTGCG<br>CV | NDUFA8      | + | 125 | 135 | 3.45E-<br>07 | 0.0031<br>4 | GCGCATGCGC<br>A |
| 1 | GCGCVTGCG<br>CV | DAD1        | + | 129 | 139 | 3.45E-<br>07 | 0.0031<br>4 | GCGCATGCGC<br>A |

|   |                 |         |   |     |     |              |             |                 |
|---|-----------------|---------|---|-----|-----|--------------|-------------|-----------------|
| 1 | GCGCVTGCG<br>CV | NDUFAF5 | + | 138 | 148 | 3.45E-<br>07 | 0.0031<br>4 | GCGCATGCGC<br>A |
| 1 | GCGCVTGCG<br>CV | FAM220A | - | 15  | 25  | 4.58E-<br>07 | 0.0033<br>4 | GCGCATGCGC<br>G |
| 1 | GCGCVTGCG<br>CV | TIMM8B  | - | 26  | 36  | 4.58E-<br>07 | 0.0033<br>4 | GCGCATGCGC<br>G |
| 1 | GCGCVTGCG<br>CV | GTF2IP4 | - | 52  | 62  | 4.58E-<br>07 | 0.0033<br>4 | GCGCATGCGC<br>G |
| 1 | GCGCVTGCG<br>CV | GTF2IP1 | - | 52  | 62  | 4.58E-<br>07 | 0.0033<br>4 | GCGCATGCGC<br>G |
| 1 | GCGCVTGCG<br>CV | GATS    | - | 55  | 65  | 4.58E-<br>07 | 0.0033<br>4 | GCGCATGCGC<br>G |
| 1 | GCGCVTGCG<br>CV | NNAT    | - | 77  | 87  | 4.58E-<br>07 | 0.0033<br>4 | GCGCATGCGC<br>G |
| 1 | GCGCVTGCG<br>CV | ORAOV1  | - | 85  | 95  | 4.58E-<br>07 | 0.0033<br>4 | GCGCATGCGC<br>G |
| 1 | GCGCVTGCG<br>CV | USO1    | - | 97  | 107 | 4.58E-<br>07 | 0.0033<br>4 | GCGCATGCGC<br>G |
| 1 | GCGCVTGCG<br>CV | MSL3P1  | - | 110 | 120 | 4.58E-<br>07 | 0.0033<br>4 | GCGCATGCGC<br>G |
| 1 | GCGCVTGCG<br>CV | ALG6    | - | 137 | 147 | 4.58E-<br>07 | 0.0033<br>4 | GCGCATGCGC<br>G |
| 1 | GCGCVTGCG<br>CV | RAN     | + | 3   | 13  | 4.58E-<br>07 | 0.0033<br>4 | GCGCATGCGC<br>G |
| 1 | GCGCVTGCG<br>CV | MAGI1   | + | 13  | 23  | 4.58E-<br>07 | 0.0033<br>4 | GCGCATGCGC<br>G |
| 1 | GCGCVTGCG<br>CV | CKLF    | + | 15  | 25  | 4.58E-<br>07 | 0.0033<br>4 | GCGCATGCGC<br>G |
| 1 | GCGCVTGCG<br>CV | FAM220A | + | 16  | 26  | 4.58E-<br>07 | 0.0033<br>4 | GCGCATGCGC<br>G |
| 1 | GCGCVTGCG<br>CV | TMEM14A | + | 54  | 64  | 4.58E-<br>07 | 0.0033<br>4 | GCGCATGCGC<br>G |
| 1 | GCGCVTGCG<br>CV | UROS    | + | 89  | 99  | 4.58E-<br>07 | 0.0033<br>4 | GCGCATGCGC<br>G |
| 1 | GCGCVTGCG<br>CV | CASZ1   | + | 99  | 109 | 4.58E-<br>07 | 0.0033<br>4 | GCGCATGCGC<br>G |
| 1 | GCGCVTGCG<br>CV | PSMA4   | + | 123 | 133 | 4.58E-<br>07 | 0.0033<br>4 | GCGCATGCGC<br>G |
| 1 | GCGCVTGCG<br>CV | ATP5C1  | + | 127 | 137 | 4.58E-<br>07 | 0.0033<br>4 | GCGCATGCGC<br>G |
| 1 | GCGCVTGCG<br>CV | ELP6    | + | 156 | 166 | 4.58E-<br>07 | 0.0033<br>4 | GCGCATGCGC<br>G |
| 1 | GCGCVTGCG<br>CV | MMADHC  | + | 1   | 11  | 5.71E-<br>07 | 0.0035<br>9 | GCGCGTGCGC<br>A |
| 1 | GCGCVTGCG<br>CV | HSDL1   | - | 14  | 24  | 5.71E-<br>07 | 0.0035<br>9 | GCGCGTGCGC<br>A |
| 1 | GCGCVTGCG<br>CV | EZH1    | - | 39  | 49  | 5.71E-<br>07 | 0.0035<br>9 | GCGCGTGCGC<br>A |
| 1 | GCGCVTGCG<br>CV | DIP2A   | - | 45  | 55  | 5.71E-<br>07 | 0.0035<br>9 | GCGCGTGCGC<br>A |
| 1 | GCGCVTGCG<br>CV | TMEM263 | + | 56  | 66  | 5.71E-<br>07 | 0.0035<br>9 | GCGCGTGCGC<br>A |
| 1 | GCGCVTGCG<br>CV | NDUFA12 | - | 57  | 67  | 5.71E-<br>07 | 0.0035<br>9 | GCGCGTGCGC<br>A |

|   |                 |         |   |     |     |              |             |                 |
|---|-----------------|---------|---|-----|-----|--------------|-------------|-----------------|
| 1 | GCGCVTGCG<br>CV | SNRNP70 | + | 76  | 86  | 5.71E-<br>07 | 0.0035<br>9 | GCGCGTGCGC<br>A |
| 1 | GCGCVTGCG<br>CV | EIF3K   | - | 69  | 79  | 5.71E-<br>07 | 0.0035<br>9 | GCGCGTGCGC<br>A |
| 1 | GCGCVTGCG<br>CV | TMEM14B | - | 74  | 84  | 5.71E-<br>07 | 0.0035<br>9 | GCGCGTGCGC<br>A |
| 1 | GCGCVTGCG<br>CV | ELP6    | + | 88  | 98  | 5.71E-<br>07 | 0.0035<br>9 | GCGCGTGCGC<br>A |
| 1 | GCGCVTGCG<br>CV | BNIP3   | - | 83  | 93  | 5.71E-<br>07 | 0.0035<br>9 | GCGCGTGCGC<br>A |
| 1 | GCGCVTGCG<br>CV | SNHG3   | - | 87  | 97  | 5.71E-<br>07 | 0.0035<br>9 | GCGCGTGCGC<br>A |
| 1 | GCGCVTGCG<br>CV | N6AMT2  | - | 123 | 133 | 5.71E-<br>07 | 0.0035<br>9 | GCGCGTGCGC<br>A |
| 1 | GCGCVTGCG<br>CV | PDRG1   | + | 159 | 169 | 5.71E-<br>07 | 0.0035<br>9 | GCGCGTGCGC<br>A |
| 1 | GCGCVTGCG<br>CV | PTGES3  | - | 167 | 177 | 5.71E-<br>07 | 0.0035<br>9 | GCGCGTGCGC<br>A |
| 1 | GCGCVTGCG<br>CV | VDAC3   | - | 168 | 178 | 5.71E-<br>07 | 0.0035<br>9 | GCGCGTGCGC<br>A |
| 1 | GCGCVTGCG<br>CV | CYTH1   | - | 30  | 40  | 6.65E-<br>07 | 0.0038<br>1 | GCGCCTGCGC<br>C |
| 1 | GCGCVTGCG<br>CV | SKP1    | + | 42  | 52  | 6.65E-<br>07 | 0.0038<br>1 | GCGCCTGCGC<br>C |
| 1 | GCGCVTGCG<br>CV | CYTH1   | - | 36  | 46  | 6.65E-<br>07 | 0.0038<br>1 | GCGCCTGCGC<br>C |
| 1 | GCGCVTGCG<br>CV | SAP18   | + | 58  | 68  | 6.65E-<br>07 | 0.0038<br>1 | GCGCCTGCGC<br>C |
| 1 | GCGCVTGCG<br>CV | FAM195B | + | 80  | 90  | 6.65E-<br>07 | 0.0038<br>1 | GCGCCTGCGC<br>C |
| 1 | GCGCVTGCG<br>CV | GTF2H5  | - | 71  | 81  | 6.65E-<br>07 | 0.0038<br>1 | GCGCCTGCGC<br>C |
| 1 | GCGCVTGCG<br>CV | CHAC2   | + | 88  | 98  | 6.65E-<br>07 | 0.0038<br>1 | GCGCCTGCGC<br>C |
| 1 | GCGCVTGCG<br>CV | NBPF9   | + | 88  | 98  | 6.65E-<br>07 | 0.0038<br>1 | GCGCCTGCGC<br>C |
| 1 | GCGCVTGCG<br>CV | NBPF15  | + | 93  | 103 | 6.65E-<br>07 | 0.0038<br>1 | GCGCCTGCGC<br>C |
| 1 | GCGCVTGCG<br>CV | STIM2   | - | 125 | 135 | 6.65E-<br>07 | 0.0038<br>1 | GCGCCTGCGC<br>C |
| 1 | GCGCVTGCG<br>CV | KDM3A   | + | 180 | 190 | 6.65E-<br>07 | 0.0038<br>1 | GCGCCTGCGC<br>C |
| 1 | GCGCVTGCG<br>CV | DYNLL1  | + | 7   | 17  | 7.58E-<br>07 | 0.0038<br>1 | GCGCGTGCGC<br>G |
| 1 | GCGCVTGCG<br>CV | PCNT    | + | 20  | 30  | 7.58E-<br>07 | 0.0038<br>1 | GCGCGTGCGC<br>G |
| 1 | GCGCVTGCG<br>CV | CHERP   | + | 23  | 33  | 7.58E-<br>07 | 0.0038<br>1 | GCGCGTGCGC<br>G |
| 1 | GCGCVTGCG<br>CV | ZXDC    | - | 18  | 28  | 7.58E-<br>07 | 0.0038<br>1 | GCGCGTGCGC<br>G |
| 1 | GCGCVTGCG<br>CV | CLPTMIL | + | 45  | 55  | 7.58E-<br>07 | 0.0038<br>1 | GCGCGTGCGC<br>G |
| 1 | GCGCVTGCG<br>CV | CTSC    | - | 43  | 53  | 7.58E-<br>07 | 0.0038<br>1 | GCGCGTGCGC<br>G |

|   |                 |          |   |     |     |              |             |                 |
|---|-----------------|----------|---|-----|-----|--------------|-------------|-----------------|
| 1 | GCGCVTGCG<br>CV | BNIP3    | - | 44  | 54  | 7.58E-<br>07 | 0.0038<br>1 | GCGCGTGCGC<br>G |
| 1 | GCGCVTGCG<br>CV | RIOK2    | + | 58  | 68  | 7.58E-<br>07 | 0.0038<br>1 | GCGCGTGCGC<br>G |
| 1 | GCGCVTGCG<br>CV | TMEM135  | - | 64  | 74  | 7.58E-<br>07 | 0.0038<br>1 | GCGCGTGCGC<br>G |
| 1 | GCGCVTGCG<br>CV | NIPA2    | + | 77  | 87  | 7.58E-<br>07 | 0.0038<br>1 | GCGCGTGCGC<br>G |
| 1 | GCGCVTGCG<br>CV | HMGN1P20 | - | 71  | 81  | 7.58E-<br>07 | 0.0038<br>1 | GCGCGTGCGC<br>G |
| 1 | GCGCVTGCG<br>CV | RALGAPB  | - | 71  | 81  | 7.58E-<br>07 | 0.0038<br>1 | GCGCGTGCGC<br>G |
| 1 | GCGCVTGCG<br>CV | DIP2A    | - | 78  | 88  | 7.58E-<br>07 | 0.0038<br>1 | GCGCGTGCGC<br>G |
| 1 | GCGCVTGCG<br>CV | OSTC     | - | 85  | 95  | 7.58E-<br>07 | 0.0038<br>1 | GCGCGTGCGC<br>G |
| 1 | GCGCVTGCG<br>CV | UQCR11   | + | 100 | 110 | 7.58E-<br>07 | 0.0038<br>1 | GCGCGTGCGC<br>G |
| 1 | GCGCVTGCG<br>CV | AKAP1    | - | 122 | 132 | 7.58E-<br>07 | 0.0038<br>1 | GCGCGTGCGC<br>G |
| 1 | GCGCVTGCG<br>CV | TMEM263  | + | 168 | 178 | 7.58E-<br>07 | 0.0038<br>1 | GCGCGTGCGC<br>G |
| 1 | GCGCVTGCG<br>CV | RAN      | - | 171 | 181 | 7.58E-<br>07 | 0.0038<br>1 | GCGCGTGCGC<br>G |
| 1 | GCGCVTGCG<br>CV | MED18    | + | 12  | 22  | 8.71E-<br>07 | 0.0040<br>4 | GCGCATGCGC<br>C |
| 1 | GCGCVTGCG<br>CV | MAGI1    | - | 12  | 22  | 8.71E-<br>07 | 0.0040<br>4 | GCGCATGCGC<br>C |
| 1 | GCGCVTGCG<br>CV | TEKT4P2  | + | 65  | 75  | 8.71E-<br>07 | 0.0040<br>4 | GCGCATGCGC<br>C |
| 1 | GCGCVTGCG<br>CV | MARS2    | + | 74  | 84  | 8.71E-<br>07 | 0.0040<br>4 | GCGCATGCGC<br>C |
| 1 | GCGCVTGCG<br>CV | ORAOV1   | + | 86  | 96  | 8.71E-<br>07 | 0.0040<br>4 | GCGCATGCGC<br>C |
| 1 | GCGCVTGCG<br>CV | SLX4     | - | 84  | 94  | 8.71E-<br>07 | 0.0040<br>4 | GCGCATGCGC<br>C |
| 1 | GCGCVTGCG<br>CV | MSL3P1   | + | 111 | 121 | 8.71E-<br>07 | 0.0040<br>4 | GCGCATGCGC<br>C |
| 1 | GCGCVTGCG<br>CV | ATP5C1   | - | 126 | 136 | 8.71E-<br>07 | 0.0040<br>4 | GCGCATGCGC<br>C |
| 1 | GCGCVTGCG<br>CV | ALG6     | + | 138 | 148 | 8.71E-<br>07 | 0.0040<br>4 | GCGCATGCGC<br>C |
| 1 | GCGCVTGCG<br>CV | NDUFAF5  | - | 137 | 147 | 8.71E-<br>07 | 0.0040<br>4 | GCGCATGCGC<br>C |
| 1 | GCGCVTGCG<br>CV | GEMIN2   | + | 180 | 190 | 8.71E-<br>07 | 0.0040<br>4 | GCGCATGCGC<br>C |
| 1 | GCGCVTGCG<br>CV | GEMIN2   | - | 179 | 189 | 8.71E-<br>07 | 0.0040<br>4 | GCGCATGCGC<br>C |
| 1 | GCGCVTGCG<br>CV | CHMP2A   | - | 51  | 61  | 9.64E-<br>07 | 0.0043<br>9 | GCGCGTGCGC<br>C |
| 1 | GCGCVTGCG<br>CV | TMEM38B  | - | 87  | 97  | 9.64E-<br>07 | 0.0043<br>9 | GCGCGTGCGC<br>C |
| 1 | GCGCVTGCG<br>CV | TARS     | - | 111 | 121 | 9.64E-<br>07 | 0.0043<br>9 | GCGCGTGCGC<br>C |



|   |                 |            |   |     |     |              |             |                 |
|---|-----------------|------------|---|-----|-----|--------------|-------------|-----------------|
| 1 | GCGCVTGCG<br>CV | TCEB2      | - | 44  | 54  | 1.06E-<br>06 | 0.0047      | GCGCCGGCGC<br>A |
| 1 | GCGCVTGCG<br>CV | LUC7L      | - | 70  | 80  | 1.06E-<br>06 | 0.0047      | GCGCCGGCGC<br>A |
| 1 | GCGCVTGCG<br>CV | SARS       | + | 93  | 103 | 1.06E-<br>06 | 0.0047      | GCGCCGGCGC<br>A |
| 1 | GCGCVTGCG<br>CV | CCDC84     | + | 160 | 170 | 1.06E-<br>06 | 0.0047      | GCGCCGGCGC<br>A |
| 1 | GCGCVTGCG<br>CV | NDUFB2-AS1 | - | 30  | 40  | 1.13E-<br>06 | 0.0048<br>3 | GCGCCGGCGC<br>G |
| 1 | GCGCVTGCG<br>CV | TCEB2      | + | 45  | 55  | 1.13E-<br>06 | 0.0048<br>3 | GCGCCGGCGC<br>G |
| 1 | GCGCVTGCG<br>CV | LSM4       | + | 69  | 79  | 1.13E-<br>06 | 0.0048<br>3 | GCGCCGGCGC<br>G |
| 1 | GCGCVTGCG<br>CV | LSM4       | - | 68  | 78  | 1.13E-<br>06 | 0.0048<br>3 | GCGCCGGCGC<br>G |
| 1 | GCGCVTGCG<br>CV | MTX2       | - | 71  | 81  | 1.13E-<br>06 | 0.0048<br>3 | GCGCCGGCGC<br>G |
| 1 | GCGCVTGCG<br>CV | SARS       | - | 92  | 102 | 1.13E-<br>06 | 0.0048<br>3 | GCGCCGGCGC<br>G |
| 1 | GCGCVTGCG<br>CV | AC011747.4 | + | 115 | 125 | 1.13E-<br>06 | 0.0048<br>3 | GCGCCGGCGC<br>G |
| 1 | GCGCVTGCG<br>CV | CANX       | + | 13  | 23  | 1.27E-<br>06 | 0.0052<br>4 | GCGCTTGCGC<br>A |
| 1 | GCGCVTGCG<br>CV | COMMD8     | - | 6   | 16  | 1.27E-<br>06 | 0.0052<br>4 | GCGCTTGCGC<br>A |
| 1 | GCGCVTGCG<br>CV | FNBP4      | + | 87  | 97  | 1.27E-<br>06 | 0.0052<br>4 | GCGCTTGCGC<br>A |
| 1 | GCGCVTGCG<br>CV | FNBP4      | - | 92  | 102 | 1.27E-<br>06 | 0.0052<br>4 | GCGCTTGCGC<br>A |
| 1 | GCGCVTGCG<br>CV | UBA52      | - | 181 | 191 | 1.27E-<br>06 | 0.0052<br>4 | GCGCTTGCGC<br>A |
| 1 | GCGCVTGCG<br>CV | ZNF865     | - | 191 | 201 | 1.27E-<br>06 | 0.0052<br>4 | GCGCTTGCGC<br>A |
| 1 | GCGCVTGCG<br>CV | TMEM87A    | + | 70  | 80  | 1.41E-<br>06 | 0.0057<br>7 | ACGCCTGCGC<br>A |
| 1 | GCGCVTGCG<br>CV | PDRG1      | + | 100 | 110 | 1.64E-<br>06 | 0.0066<br>1 | GAGCCTGCGC<br>A |
| 1 | GCGCVTGCG<br>CV | FAM3D      | + | 132 | 142 | 1.64E-<br>06 | 0.0066<br>1 | GAGCCTGCGC<br>A |
| 1 | GCGCVTGCG<br>CV | NDUFB4     | + | 178 | 188 | 1.64E-<br>06 | 0.0066<br>1 | GAGCCTGCGC<br>A |
| 1 | GCGCVTGCG<br>CV | MLH1       | - | 65  | 75  | 1.75E-<br>06 | 0.0069<br>7 | GCGCTTGCGC<br>G |
| 1 | GCGCVTGCG<br>CV | COPB1      | - | 80  | 90  | 1.75E-<br>06 | 0.0069<br>7 | GCGCTTGCGC<br>G |
| 1 | GCGCVTGCG<br>CV | C1GALT1C1  | + | 94  | 104 | 1.87E-<br>06 | 0.0069<br>7 | ACGCCTGCGC<br>G |
| 1 | GCGCVTGCG<br>CV | NSF        | + | 110 | 120 | 1.87E-<br>06 | 0.0069<br>7 | ACGCCTGCGC<br>G |
| 1 | GCGCVTGCG<br>CV | HNRNPA1    | - | 1   | 11  | 2.10E-<br>06 | 0.0069<br>7 | GCGCAGGCG<br>CA |
| 1 | GCGCVTGCG<br>CV | CSTF1      | + | 13  | 23  | 2.10E-<br>06 | 0.0069<br>7 | GCGCAGGCG<br>CA |

|   |                 |            |   |     |     |              |             |                 |
|---|-----------------|------------|---|-----|-----|--------------|-------------|-----------------|
| 1 | GCGCVTGCG<br>CV | CCDC84     | - | 5   | 15  | 2.10E-<br>06 | 0.0069<br>7 | GCGGCTGCGC<br>A |
| 1 | GCGCVTGCG<br>CV | CYTH1      | + | 31  | 41  | 2.10E-<br>06 | 0.0069<br>7 | GCGCAGGCG<br>CA |
| 1 | GCGCVTGCG<br>CV | GMNN       | + | 33  | 43  | 2.10E-<br>06 | 0.0069<br>7 | GCGCAGGCG<br>CA |
| 1 | GCGCVTGCG<br>CV | IQSEC3     | - | 29  | 39  | 2.10E-<br>06 | 0.0069<br>7 | GCGGCTGCGC<br>A |
| 1 | GCGCVTGCG<br>CV | GTF2F2     | + | 53  | 63  | 2.10E-<br>06 | 0.0069<br>7 | GCGCAGGCG<br>CA |
| 1 | GCGCVTGCG<br>CV | NEIL2      | - | 43  | 53  | 2.10E-<br>06 | 0.0069<br>7 | GCGCAGGCG<br>CA |
| 1 | GCGCVTGCG<br>CV | AC024560.3 | + | 54  | 64  | 2.10E-<br>06 | 0.0069<br>7 | GCGCAGGCG<br>CA |
| 1 | GCGCVTGCG<br>CV | SLX4       | - | 45  | 55  | 2.10E-<br>06 | 0.0069<br>7 | GCGCAGGCG<br>CA |
| 1 | GCGCVTGCG<br>CV | GTF2I      | + | 58  | 68  | 2.10E-<br>06 | 0.0069<br>7 | GCGCAGGCG<br>CA |
| 1 | GCGCVTGCG<br>CV | NDUFB4     | + | 65  | 75  | 2.10E-<br>06 | 0.0069<br>7 | GCGCAGGCG<br>CA |
| 1 | GCGCVTGCG<br>CV | SAP18      | - | 57  | 67  | 2.10E-<br>06 | 0.0069<br>7 | GCGCAGGCG<br>CA |
| 1 | GCGCVTGCG<br>CV | TBC1D17    | - | 59  | 69  | 2.10E-<br>06 | 0.0069<br>7 | GCGCAGGCG<br>CA |
| 1 | GCGCVTGCG<br>CV | GTF2H5     | + | 72  | 82  | 2.10E-<br>06 | 0.0069<br>7 | GCGCAGGCG<br>CA |
| 1 | GCGCVTGCG<br>CV | N6AMT2     | - | 63  | 73  | 2.10E-<br>06 | 0.0069<br>7 | GCGCAGGCG<br>CA |
| 1 | GCGCVTGCG<br>CV | SARS       | - | 65  | 75  | 2.10E-<br>06 | 0.0069<br>7 | GCGCAGGCG<br>CA |
| 1 | GCGCVTGCG<br>CV | STX1A      | - | 66  | 76  | 2.10E-<br>06 | 0.0069<br>7 | GCGGCTGCGC<br>A |
| 1 | GCGCVTGCG<br>CV | DYNLT1     | - | 76  | 86  | 2.10E-<br>06 | 0.0069<br>7 | GCGCAGGCG<br>CA |
| 1 | GCGCVTGCG<br>CV | ATP6V1G1   | + | 86  | 96  | 2.10E-<br>06 | 0.0069<br>7 | GCGCAGGCG<br>CA |
| 1 | GCGCVTGCG<br>CV | BCCIP      | + | 88  | 98  | 2.10E-<br>06 | 0.0069<br>7 | GCGCAGGCG<br>CA |
| 1 | GCGCVTGCG<br>CV | TMEM141    | - | 79  | 89  | 2.10E-<br>06 | 0.0069<br>7 | GCGCAGGCG<br>CA |
| 1 | GCGCVTGCG<br>CV | FAM195B    | - | 79  | 89  | 2.10E-<br>06 | 0.0069<br>7 | GCGCAGGCG<br>CA |
| 1 | GCGCVTGCG<br>CV | NBPF9      | - | 87  | 97  | 2.10E-<br>06 | 0.0069<br>7 | GCGCAGGCG<br>CA |
| 1 | GCGCVTGCG<br>CV | ZNF483     | + | 99  | 109 | 2.10E-<br>06 | 0.0069<br>7 | GCGCAGGCG<br>CA |
| 1 | GCGCVTGCG<br>CV | NBPF15     | - | 92  | 102 | 2.10E-<br>06 | 0.0069<br>7 | GCGCAGGCG<br>CA |
| 1 | GCGCVTGCG<br>CV | RPL5       | - | 93  | 103 | 2.10E-<br>06 | 0.0069<br>7 | GCGCAGGCG<br>CA |
| 1 | GCGCVTGCG<br>CV | AC024560.3 | + | 104 | 114 | 2.10E-<br>06 | 0.0069<br>7 | GCGCAGGCG<br>CA |
| 1 | GCGCVTGCG<br>CV | ZNF865     | + | 119 | 129 | 2.10E-<br>06 | 0.0069<br>7 | GCGCAGGCG<br>CA |

|   |                 |               |   |     |     |              |             |                 |
|---|-----------------|---------------|---|-----|-----|--------------|-------------|-----------------|
| 1 | GCGCVTGCG<br>CV | NDUFB4        | + | 120 | 130 | 2.10E-<br>06 | 0.0069<br>7 | GCGCAGGCG<br>CA |
| 1 | GCGCVTGCG<br>CV | ZNF627        | - | 111 | 121 | 2.10E-<br>06 | 0.0069<br>7 | GCGCAGGCG<br>CA |
| 1 | GCGCVTGCG<br>CV | TMED9         | + | 132 | 142 | 2.10E-<br>06 | 0.0069<br>7 | GCGGCTGCGC<br>A |
| 1 | GCGCVTGCG<br>CV | BRK1          | + | 144 | 154 | 2.10E-<br>06 | 0.0069<br>7 | GCGCAGGCG<br>CA |
| 1 | GCGCVTGCG<br>CV | KDM3A         | - | 179 | 189 | 2.10E-<br>06 | 0.0069<br>7 | GCGCAGGCG<br>CA |
| 1 | GCGCVTGCG<br>CV | C19orf70      | - | 18  | 28  | 2.17E-<br>06 | 0.0071      | GCGCCCGCGC<br>G |
| 1 | GCGCVTGCG<br>CV | C6orf48       | + | 52  | 62  | 2.17E-<br>06 | 0.0071      | GCGCCCGCGC<br>G |
| 1 | GCGCVTGCG<br>CV | GJB2          | + | 75  | 85  | 2.17E-<br>06 | 0.0071      | GCGCCCGCGC<br>G |
| 1 | GCGCVTGCG<br>CV | FAM63B        | + | 149 | 159 | 2.17E-<br>06 | 0.0071      | GCGCCCGCGC<br>G |
| 1 | GCGCVTGCG<br>CV | MFSD1         | + | 45  | 55  | 2.28E-<br>06 | 0.0073<br>6 | GAGCCTGCGC<br>G |
| 1 | GCGCVTGCG<br>CV | RP11-46F15.2  | - | 36  | 46  | 2.28E-<br>06 | 0.0073<br>6 | GAGCCTGCGC<br>G |
| 1 | GCGCVTGCG<br>CV | ZBTB4         | + | 83  | 93  | 2.40E-<br>06 | 0.0073<br>6 | CCGCCTGCGC<br>A |
| 1 | GCGCVTGCG<br>CV | AC024560.3    | + | 2   | 12  | 2.58E-<br>06 | 0.0073<br>6 | GCGCAGGCG<br>CG |
| 1 | GCGCVTGCG<br>CV | PRDX5         | - | 4   | 14  | 2.58E-<br>06 | 0.0073<br>6 | GCGCAGGCG<br>CG |
| 1 | GCGCVTGCG<br>CV | HIST1H1C      | - | 12  | 22  | 2.58E-<br>06 | 0.0073<br>6 | GCGCAGGCG<br>CG |
| 1 | GCGCVTGCG<br>CV | CYTH1         | + | 37  | 47  | 2.58E-<br>06 | 0.0073<br>6 | GCGCAGGCG<br>CG |
| 1 | GCGCVTGCG<br>CV | PATL1         | - | 32  | 42  | 2.58E-<br>06 | 0.0073<br>6 | GCGCAGGCG<br>CG |
| 1 | GCGCVTGCG<br>CV | UXS1          | - | 34  | 44  | 2.58E-<br>06 | 0.0073<br>6 | GCGCAGGCG<br>CG |
| 1 | GCGCVTGCG<br>CV | KLHL9         | - | 37  | 47  | 2.58E-<br>06 | 0.0073<br>6 | GCGGCTGCGC<br>G |
| 1 | GCGCVTGCG<br>CV | LSM2          | - | 41  | 51  | 2.58E-<br>06 | 0.0073<br>6 | GCGCAGGCG<br>CG |
| 1 | GCGCVTGCG<br>CV | CNIH1         | + | 57  | 67  | 2.58E-<br>06 | 0.0073<br>6 | GCGCAGGCG<br>CG |
| 1 | GCGCVTGCG<br>CV | FOXP2         | + | 73  | 83  | 2.58E-<br>06 | 0.0073<br>6 | GCGGCTGCGC<br>G |
| 1 | GCGCVTGCG<br>CV | RP11-307E17.8 | - | 64  | 74  | 2.58E-<br>06 | 0.0073<br>6 | GCGCAGGCG<br>CG |
| 1 | GCGCVTGCG<br>CV | ULK1          | + | 75  | 85  | 2.58E-<br>06 | 0.0073<br>6 | GCGGCTGCGC<br>G |
| 1 | GCGCVTGCG<br>CV | MINK1         | - | 68  | 78  | 2.58E-<br>06 | 0.0073<br>6 | GCGCAGGCG<br>CG |
| 1 | GCGCVTGCG<br>CV | LDHAL6B       | - | 72  | 82  | 2.58E-<br>06 | 0.0073<br>6 | GCGGCTGCGC<br>G |
| 1 | GCGCVTGCG<br>CV | R3HDM2        | - | 72  | 82  | 2.58E-<br>06 | 0.0073<br>6 | GCGGCTGCGC<br>G |

|   |                 |          |   |     |     |              |             |                 |
|---|-----------------|----------|---|-----|-----|--------------|-------------|-----------------|
| 1 | GCGCVTGCG<br>CV | FAM220A  | + | 85  | 95  | 2.58E-<br>06 | 0.0073<br>6 | GCGCAGGCG<br>CG |
| 1 | GCGCVTGCG<br>CV | SLC12A6  | + | 89  | 99  | 2.58E-<br>06 | 0.0073<br>6 | GCGCAGGCG<br>CG |
| 1 | GCGCVTGCG<br>CV | SLX4     | + | 91  | 101 | 2.58E-<br>06 | 0.0073<br>6 | GCGCAGGCG<br>CG |
| 1 | GCGCVTGCG<br>CV | UQCR10   | + | 93  | 103 | 2.58E-<br>06 | 0.0073<br>6 | GCGCAGGCG<br>CG |
| 1 | GCGCVTGCG<br>CV | FUNDC1   | - | 83  | 93  | 2.58E-<br>06 | 0.0073<br>6 | GCGCAGGCG<br>CG |
| 1 | GCGCVTGCG<br>CV | CHAC2    | - | 87  | 97  | 2.58E-<br>06 | 0.0073<br>6 | GCGCAGGCG<br>CG |
| 1 | GCGCVTGCG<br>CV | RTCB     | - | 94  | 104 | 2.58E-<br>06 | 0.0073<br>6 | GCGCAGGCG<br>CG |
| 1 | GCGCVTGCG<br>CV | NEO1     | + | 106 | 116 | 2.58E-<br>06 | 0.0073<br>6 | GCGGCTGCGC<br>G |
| 1 | GCGCVTGCG<br>CV | CDC42BPG | + | 109 | 119 | 2.58E-<br>06 | 0.0073<br>6 | GCGGCTGCGC<br>G |
| 1 | GCGCVTGCG<br>CV | RBX1     | + | 111 | 121 | 2.58E-<br>06 | 0.0073<br>6 | GCGCAGGCG<br>CG |
| 1 | GCGCVTGCG<br>CV | RPS15    | + | 125 | 135 | 2.58E-<br>06 | 0.0073<br>6 | GCGCAGGCG<br>CG |
| 1 | GCGCVTGCG<br>CV | UQCR11   | - | 118 | 128 | 2.58E-<br>06 | 0.0073<br>6 | GCGCAGGCG<br>CG |
| 1 | GCGCVTGCG<br>CV | PDRG1    | + | 128 | 138 | 2.58E-<br>06 | 0.0073<br>6 | GCGCAGGCG<br>CG |
| 1 | GCGCVTGCG<br>CV | OMA1     | - | 148 | 158 | 2.58E-<br>06 | 0.0073<br>6 | GCGCAGGCG<br>CG |
| 1 | GCGCVTGCG<br>CV | WRB      | + | 163 | 173 | 2.58E-<br>06 | 0.0073<br>6 | GCGCAGGCG<br>CG |
| 1 | GCGCVTGCG<br>CV | HELQ     | + | 1   | 11  | 2.75E-<br>06 | 0.0075<br>1 | ACGCATGCGC<br>A |
| 1 | GCGCVTGCG<br>CV | ZNF576   | + | 13  | 23  | 2.75E-<br>06 | 0.0075<br>1 | ACGCATGCGC<br>A |
| 1 | GCGCVTGCG<br>CV | MRPL36   | + | 30  | 40  | 2.75E-<br>06 | 0.0075<br>1 | ACGCATGCGC<br>A |
| 1 | GCGCVTGCG<br>CV | DYRK1B   | - | 23  | 33  | 2.75E-<br>06 | 0.0075<br>1 | ACGCATGCGC<br>A |
| 1 | GCGCVTGCG<br>CV | DHX9     | - | 31  | 41  | 2.75E-<br>06 | 0.0075<br>1 | ACGCATGCGC<br>A |
| 1 | GCGCVTGCG<br>CV | HNRNPA1  | + | 50  | 60  | 2.75E-<br>06 | 0.0075<br>1 | ACGCATGCGC<br>A |
| 1 | GCGCVTGCG<br>CV | MRPS18C  | - | 65  | 75  | 2.75E-<br>06 | 0.0075<br>1 | ACGCATGCGC<br>A |
| 1 | GCGCVTGCG<br>CV | DISP2    | + | 81  | 91  | 2.75E-<br>06 | 0.0075<br>1 | ACGCATGCGC<br>A |
| 1 | GCGCVTGCG<br>CV | SPOP     | + | 84  | 94  | 2.75E-<br>06 | 0.0075<br>1 | ACGCATGCGC<br>A |
| 1 | GCGCVTGCG<br>CV | MRPL22   | - | 79  | 89  | 2.75E-<br>06 | 0.0075<br>1 | ACGCATGCGC<br>A |
| 1 | GCGCVTGCG<br>CV | SRSF7    | + | 117 | 127 | 2.75E-<br>06 | 0.0075<br>1 | ACGCATGCGC<br>A |
| 1 | GCGCVTGCG<br>CV | HSDL1    | + | 15  | 25  | 2.96E-<br>06 | 0.0076<br>2 | GCGCACGCGC<br>A |

|   |                 |            |   |     |     |              |             |                 |
|---|-----------------|------------|---|-----|-----|--------------|-------------|-----------------|
| 1 | GCGCVTGCG<br>CV | DYNLL1     | - | 6   | 16  | 2.96E-<br>06 | 0.0076<br>2 | GCGCACGCGC<br>A |
| 1 | GCGCVTGCG<br>CV | CHERP      | - | 22  | 32  | 2.96E-<br>06 | 0.0076<br>2 | GCGCACGCGC<br>A |
| 1 | GCGCVTGCG<br>CV | SNHG1      | - | 44  | 54  | 2.96E-<br>06 | 0.0076<br>2 | GCGCACGCGC<br>A |
| 1 | GCGCVTGCG<br>CV | CLPTM1L    | - | 44  | 54  | 2.96E-<br>06 | 0.0076<br>2 | GCGCACGCGC<br>A |
| 1 | GCGCVTGCG<br>CV | AFF1       | + | 58  | 68  | 2.96E-<br>06 | 0.0076<br>2 | CCGCCTGCGC<br>G |
| 1 | GCGCVTGCG<br>CV | NDUFA12    | + | 58  | 68  | 2.96E-<br>06 | 0.0076<br>2 | GCGCACGCGC<br>A |
| 1 | GCGCVTGCG<br>CV | DYRK1B     | - | 52  | 62  | 2.96E-<br>06 | 0.0076<br>2 | CCGCCTGCGC<br>G |
| 1 | GCGCVTGCG<br>CV | RALGAPB    | + | 72  | 82  | 2.96E-<br>06 | 0.0076<br>2 | GCGCACGCGC<br>A |
| 1 | GCGCVTGCG<br>CV | BNIP3      | + | 84  | 94  | 2.96E-<br>06 | 0.0076<br>2 | GCGCACGCGC<br>A |
| 1 | GCGCVTGCG<br>CV | OSTC       | + | 86  | 96  | 2.96E-<br>06 | 0.0076<br>2 | GCGCACGCGC<br>A |
| 1 | GCGCVTGCG<br>CV | NIPA2      | - | 76  | 86  | 2.96E-<br>06 | 0.0076<br>2 | GCGCACGCGC<br>A |
| 1 | GCGCVTGCG<br>CV | SNHG3      | + | 88  | 98  | 2.96E-<br>06 | 0.0076<br>2 | GCGCACGCGC<br>A |
| 1 | GCGCVTGCG<br>CV | TARS       | + | 112 | 122 | 2.96E-<br>06 | 0.0076<br>2 | GCGCACGCGC<br>A |
| 1 | GCGCVTGCG<br>CV | AKAP1      | + | 123 | 133 | 2.96E-<br>06 | 0.0076<br>2 | GCGCACGCGC<br>A |
| 1 | GCGCVTGCG<br>CV | GRPEL2     | - | 176 | 186 | 2.96E-<br>06 | 0.0076<br>2 | GCGCACGCGC<br>A |
| 1 | GCGCVTGCG<br>CV | NATD1      | - | 159 | 169 | 3.05E-<br>06 | 0.0078<br>1 | GCGCGGGCG<br>CA |
| 1 | GCGCVTGCG<br>CV | NCOR2      | - | 170 | 180 | 3.05E-<br>06 | 0.0078<br>1 | GCGCGGGCG<br>CA |
| 1 | GCGCVTGCG<br>CV | NDUFA6     | + | 16  | 26  | 3.22E-<br>06 | 0.0080<br>9 | GAGCATGCGC<br>A |
| 1 | GCGCVTGCG<br>CV | ATP6V1F    | - | 73  | 83  | 3.22E-<br>06 | 0.0080<br>9 | GAGCATGCGC<br>A |
| 1 | GCGCVTGCG<br>CV | DOHH       | - | 83  | 93  | 3.22E-<br>06 | 0.0080<br>9 | GAGCATGCGC<br>A |
| 1 | GCGCVTGCG<br>CV | CCDC167    | + | 95  | 105 | 3.22E-<br>06 | 0.0080<br>9 | GAGCATGCGC<br>A |
| 1 | GCGCVTGCG<br>CV | NDUFAF4    | - | 96  | 106 | 3.22E-<br>06 | 0.0080<br>9 | GAGCATGCGC<br>A |
| 1 | GCGCVTGCG<br>CV | LRCH1      | + | 183 | 193 | 3.33E-<br>06 | 0.0083<br>5 | GCGCCTGCC<br>A  |
| 1 | GCGCVTGCG<br>CV | TMEM30A    | + | 7   | 17  | 3.47E-<br>06 | 0.0084<br>1 | ACGCATGCGC<br>G |
| 1 | GCGCVTGCG<br>CV | EZH1       | - | 96  | 106 | 3.47E-<br>06 | 0.0084<br>1 | ACGCATGCGC<br>G |
| 1 | GCGCVTGCG<br>CV | AC007191.4 | - | 167 | 177 | 3.47E-<br>06 | 0.0084<br>1 | ACGCATGCGC<br>G |
| 1 | GCGCVTGCG<br>CV | GTF2I      | + | 52  | 62  | 3.61E-<br>06 | 0.0084<br>1 | GCGGATGCGC<br>A |

|   |                 |            |   |     |     |              |             |                 |
|---|-----------------|------------|---|-----|-----|--------------|-------------|-----------------|
| 1 | GCGCVTGCG<br>CV | ZXDC       | + | 19  | 29  | 3.70E-<br>06 | 0.0084<br>1 | GCGCACGCGC<br>G |
| 1 | GCGCVTGCG<br>CV | SNRNP70    | - | 11  | 21  | 3.70E-<br>06 | 0.0084<br>1 | GCGCACGCGC<br>G |
| 1 | GCGCVTGCG<br>CV | PCNT       | - | 19  | 29  | 3.70E-<br>06 | 0.0084<br>1 | GCGCACGCGC<br>G |
| 1 | GCGCVTGCG<br>CV | DIP2A      | + | 46  | 56  | 3.70E-<br>06 | 0.0084<br>1 | GCGCACGCGC<br>G |
| 1 | GCGCVTGCG<br>CV | CHMP2A     | + | 52  | 62  | 3.70E-<br>06 | 0.0084<br>1 | GCGCACGCGC<br>G |
| 1 | GCGCVTGCG<br>CV | TMEM263    | - | 55  | 65  | 3.70E-<br>06 | 0.0084<br>1 | GCGCACGCGC<br>G |
| 1 | GCGCVTGCG<br>CV | TMEM106C   | + | 70  | 80  | 3.70E-<br>06 | 0.0084<br>1 | GCGCACGCGC<br>G |
| 1 | GCGCVTGCG<br>CV | TMEM38B    | + | 88  | 98  | 3.70E-<br>06 | 0.0084<br>1 | GCGCACGCGC<br>G |
| 1 | GCGCVTGCG<br>CV | ELP6       | - | 87  | 97  | 3.70E-<br>06 | 0.0084<br>1 | GCGCACGCGC<br>G |
| 1 | GCGCVTGCG<br>CV | UQCR11     | - | 99  | 109 | 3.70E-<br>06 | 0.0084<br>1 | GCGCACGCGC<br>G |
| 1 | GCGCVTGCG<br>CV | N6AMT2     | + | 124 | 134 | 3.70E-<br>06 | 0.0084<br>1 | GCGCACGCGC<br>G |
| 1 | GCGCVTGCG<br>CV | PTGES3     | + | 168 | 178 | 3.70E-<br>06 | 0.0084<br>1 | GCGCACGCGC<br>G |
| 1 | GCGCVTGCG<br>CV | VDAC3      | + | 169 | 179 | 3.70E-<br>06 | 0.0084<br>1 | GCGCACGCGC<br>G |
| 1 | GCGCVTGCG<br>CV | RAN        | + | 172 | 182 | 3.70E-<br>06 | 0.0084<br>1 | GCGCACGCGC<br>G |
| 1 | GCGCVTGCG<br>CV | TMEM263    | - | 167 | 177 | 3.70E-<br>06 | 0.0084<br>1 | GCGCACGCGC<br>G |
| 1 | GCGCVTGCG<br>CV | NDUFB2-AS1 | + | 31  | 41  | 3.78E-<br>06 | 0.0084<br>1 | GCGCCGGCGC<br>C |
| 1 | GCGCVTGCG<br>CV | BMS1P1     | + | 45  | 55  | 3.78E-<br>06 | 0.0084<br>1 | GCGCCGGCGC<br>C |
| 1 | GCGCVTGCG<br>CV | BMS1P1     | - | 44  | 54  | 3.78E-<br>06 | 0.0084<br>1 | GCGCCGGCGC<br>C |
| 1 | GCGCVTGCG<br>CV | LUC7L      | + | 71  | 81  | 3.78E-<br>06 | 0.0084<br>1 | GCGCCGGCGC<br>C |
| 1 | GCGCVTGCG<br>CV | MTX2       | + | 72  | 82  | 3.78E-<br>06 | 0.0084<br>1 | GCGCCGGCGC<br>C |
| 1 | GCGCVTGCG<br>CV | AC011747.4 | - | 114 | 124 | 3.78E-<br>06 | 0.0084<br>1 | GCGCCGGCGC<br>C |
| 1 | GCGCVTGCG<br>CV | GLUD1P3    | + | 138 | 148 | 3.78E-<br>06 | 0.0084<br>1 | GCGCCGGCGC<br>C |
| 1 | GCGCVTGCG<br>CV | GLUD1P3    | - | 137 | 147 | 3.78E-<br>06 | 0.0084<br>1 | GCGCCGGCGC<br>C |
| 1 | GCGCVTGCG<br>CV | XPOT       | + | 162 | 172 | 3.78E-<br>06 | 0.0084<br>1 | GCGCCGGCGC<br>C |
| 1 | GCGCVTGCG<br>CV | CCDC84     | - | 159 | 169 | 3.78E-<br>06 | 0.0084<br>1 | GCGCCGGCGC<br>C |
| 1 | GCGCVTGCG<br>CV | XPOT       | - | 161 | 171 | 3.78E-<br>06 | 0.0084<br>1 | GCGCCGGCGC<br>C |
| 1 | GCGCVTGCG<br>CV | AGAP1      | + | 1   | 11  | 3.86E-<br>06 | 0.0084<br>1 | GCGCGGGCG<br>CG |

|   |                 |           |   |     |     |              |             |                 |
|---|-----------------|-----------|---|-----|-----|--------------|-------------|-----------------|
| 1 | GCGCVTGCG<br>CV | AGAP1     | + | 7   | 17  | 3.86E-<br>06 | 0.0084<br>1 | GCGCGGGCG<br>CG |
| 1 | GCGCVTGCG<br>CV | C19orf70  | + | 19  | 29  | 3.86E-<br>06 | 0.0084<br>1 | GCGCGGGCG<br>CG |
| 1 | GCGCVTGCG<br>CV | C6orf48   | - | 51  | 61  | 3.86E-<br>06 | 0.0084<br>1 | GCGCGGGCG<br>CG |
| 1 | GCGCVTGCG<br>CV | NRBP2     | - | 85  | 95  | 3.86E-<br>06 | 0.0084<br>1 | GCGCGGGCG<br>CG |
| 1 | GCGCVTGCG<br>CV | PXN       | + | 106 | 116 | 3.86E-<br>06 | 0.0084<br>1 | GCGCGGGCG<br>CG |
| 1 | GCGCVTGCG<br>CV | WDR88     | + | 107 | 117 | 3.86E-<br>06 | 0.0084<br>1 | GCGCGGGCG<br>CG |
| 1 | GCGCVTGCG<br>CV | PXN       | + | 112 | 122 | 3.86E-<br>06 | 0.0084<br>1 | GCGCGGGCG<br>CG |
| 1 | GCGCVTGCG<br>CV | WDR88     | + | 113 | 123 | 3.86E-<br>06 | 0.0084<br>1 | GCGCGGGCG<br>CG |
| 1 | GCGCVTGCG<br>CV | KMT2C     | - | 109 | 119 | 3.86E-<br>06 | 0.0084<br>1 | GCGCGGGCG<br>CG |
| 1 | GCGCVTGCG<br>CV | FAM63B    | - | 148 | 158 | 3.86E-<br>06 | 0.0084<br>1 | GCGCGGGCG<br>CG |
| 1 | GCGCVTGCG<br>CV | TCF20     | - | 156 | 166 | 3.86E-<br>06 | 0.0084<br>1 | GCGCGGGCG<br>CG |
| 1 | GCGCVTGCG<br>CV | C17orf58  | - | 184 | 194 | 3.86E-<br>06 | 0.0084<br>1 | GCGCGGGCG<br>CG |
| 1 | GCGCVTGCG<br>CV | SFT2D1    | + | 55  | 65  | 3.99E-<br>06 | 0.0086<br>6 | GAGCATGCGC<br>G |
| 1 | GCGCVTGCG<br>CV | RPS10     | - | 143 | 153 | 3.99E-<br>06 | 0.0086<br>6 | GAGCATGCGC<br>G |
| 1 | GCGCVTGCG<br>CV | GOLT1A    | - | 34  | 44  | 4.09E-<br>06 | 0.0088<br>1 | GCGCCTGCC<br>G  |
| 1 | GCGCVTGCG<br>CV | C14orf166 | + | 159 | 169 | 4.09E-<br>06 | 0.0088<br>1 | GCGCCTGCC<br>G  |
| 1 | GCGCVTGCG<br>CV | TMEM116   | - | 1   | 11  | 4.36E-<br>06 | 0.0093<br>3 | ACGCGTGCGC<br>A |
| 1 | GCGCVTGCG<br>CV | ERP29     | + | 60  | 70  | 4.36E-<br>06 | 0.0093<br>3 | ACGCGTGCGC<br>A |
| 1 | GCGCVTGCG<br>CV | SYPL1     | + | 80  | 90  | 4.36E-<br>06 | 0.0093<br>3 | ACGCGTGCGC<br>A |
| 1 | GCGCVTGCG<br>CV | TMEM116   | - | 81  | 91  | 4.57E-<br>06 | 0.0096<br>3 | GCGCGCGCGC<br>A |
| 1 | GCGCVTGCG<br>CV | SSTR2     | - | 122 | 132 | 4.57E-<br>06 | 0.0096<br>3 | GCGCGCGCGC<br>A |
| 1 | GCGCVTGCG<br>CV | MBD6      | - | 147 | 157 | 4.57E-<br>06 | 0.0096<br>3 | GCGCGCGCGC<br>A |
| 1 | GCGCVTGCG<br>CV | DHX15     | + | 77  | 87  | 4.57E-<br>06 | 0.0096<br>3 | GCGCGCGCGC<br>A |
| 1 | GCGCVTGCG<br>CV | TMEM116   | + | 82  | 92  | 4.57E-<br>06 | 0.0096<br>3 | GCGCGCGCGC<br>A |
| 1 | GCGCVTGCG<br>CV | NDUFA8    | - | 68  | 78  | 4.71E-<br>06 | 0.0098<br>6 | GAGCGTGCGC<br>A |
| 1 | GCGCVTGCG<br>CV | ATG10     | - | 103 | 113 | 4.71E-<br>06 | 0.0098<br>6 | GAGCGTGCGC<br>A |
| 1 | GCGCVTGCG<br>CV | PSMB4     | - | 116 | 126 | 4.82E-<br>06 | 0.0101      | GCGCTTGCGC<br>C |

|   |                 |               |   |     |     |              |        |                 |
|---|-----------------|---------------|---|-----|-----|--------------|--------|-----------------|
| 1 | GCGCVTGCG<br>CV | ATP6V1F       | - | 3   | 13  | 5.05E-<br>06 | 0.0101 | ACGCCTGCGC<br>C |
| 1 | GCGCVTGCG<br>CV | STX1A         | - | 88  | 98  | 5.05E-<br>06 | 0.0101 | CCGCATGCGC<br>G |
| 1 | GCGCVTGCG<br>CV | ALG8          | + | 70  | 80  | 5.05E-<br>06 | 0.0101 | CCGCATGCGC<br>G |
| 1 | GCGCVTGCG<br>CV | ALG8          | + | 113 | 123 | 5.05E-<br>06 | 0.0101 | CCGCATGCGC<br>G |
| 1 | GCGCVTGCG<br>CV | METTL5        | + | 103 | 113 | 5.16E-<br>06 | 0.0101 | ACGCGTGCGC<br>G |
| 1 | GCGCVTGCG<br>CV | AGAP1         | - | 6   | 16  | 5.35E-<br>06 | 0.0101 | GCGCCCGCGC<br>C |
| 1 | GCGCVTGCG<br>CV | PXN           | - | 105 | 115 | 5.35E-<br>06 | 0.0101 | GCGCCCGCGC<br>C |
| 1 | GCGCVTGCG<br>CV | WDR88         | - | 106 | 116 | 5.35E-<br>06 | 0.0101 | GCGCCCGCGC<br>C |
| 1 | GCGCVTGCG<br>CV | PXN           | - | 111 | 121 | 5.35E-<br>06 | 0.0101 | GCGCCCGCGC<br>C |
| 1 | GCGCVTGCG<br>CV | WDR88         | - | 112 | 122 | 5.35E-<br>06 | 0.0101 | GCGCCCGCGC<br>C |
| 1 | GCGCVTGCG<br>CV | TBC1D2B       | - | 123 | 133 | 5.35E-<br>06 | 0.0101 | GCGCCCGCGC<br>C |
| 1 | GCGCVTGCG<br>CV | RP11-700A24.1 | + | 56  | 66  | 5.35E-<br>06 | 0.0101 | GCGCCCGCGC<br>C |
| 1 | GCGCVTGCG<br>CV | HSD17B10      | + | 84  | 94  | 5.35E-<br>06 | 0.0101 | GCGCCCGCGC<br>C |
| 1 | GCGCVTGCG<br>CV | NRBP2         | + | 86  | 96  | 5.35E-<br>06 | 0.0101 | GCGCCCGCGC<br>C |
| 1 | GCGCVTGCG<br>CV | KMT2C         | + | 110 | 120 | 5.35E-<br>06 | 0.0101 | GCGCCCGCGC<br>C |
| 1 | GCGCVTGCG<br>CV | FOXK1         | + | 126 | 136 | 5.35E-<br>06 | 0.0101 | GCGCCCGCGC<br>C |
| 1 | GCGCVTGCG<br>CV | TCF20         | + | 157 | 167 | 5.35E-<br>06 | 0.0101 | GCGCCCGCGC<br>C |
| 1 | GCGCVTGCG<br>CV | NCOR2         | + | 171 | 181 | 5.35E-<br>06 | 0.0101 | GCGCCCGCGC<br>C |
| 1 | GCGCVTGCG<br>CV | C17orf58      | + | 185 | 195 | 5.35E-<br>06 | 0.0101 | GCGCCCGCGC<br>C |
| 1 | GCGCVTGCG<br>CV | PANK1         | - | 21  | 31  | 5.43E-<br>06 | 0.0101 | GCGCGCGCGC<br>G |
| 1 | GCGCVTGCG<br>CV | NSF           | - | 39  | 49  | 5.43E-<br>06 | 0.0101 | GCGCGCGCGC<br>G |
| 1 | GCGCVTGCG<br>CV | PRR12         | - | 48  | 58  | 5.43E-<br>06 | 0.0101 | GCGCGCGCGC<br>G |
| 1 | GCGCVTGCG<br>CV | C6orf48       | - | 57  | 67  | 5.43E-<br>06 | 0.0101 | GCGCGCGCGC<br>G |
| 1 | GCGCVTGCG<br>CV | DHX15         | - | 74  | 84  | 5.43E-<br>06 | 0.0101 | GCGCGCGCGC<br>G |
| 1 | GCGCVTGCG<br>CV | DHX15         | - | 76  | 86  | 5.43E-<br>06 | 0.0101 | GCGCGCGCGC<br>G |
| 1 | GCGCVTGCG<br>CV | PPP5D1        | - | 83  | 93  | 5.43E-<br>06 | 0.0101 | GCGCGCGCGC<br>G |
| 1 | GCGCVTGCG<br>CV | KDEL2         | - | 134 | 144 | 5.43E-<br>06 | 0.0101 | GCGCGCGCGC<br>G |



|   |                 |               |   |     |     |              |        |                 |
|---|-----------------|---------------|---|-----|-----|--------------|--------|-----------------|
| 1 | GCGCVTGCG<br>CV | KDEL2         | - | 136 | 146 | 5.43E-<br>06 | 0.0101 | GCGCGCGCGC<br>G |
| 1 | GCGCVTGCG<br>CV | KDEL2         | - | 138 | 148 | 5.43E-<br>06 | 0.0101 | GCGCGCGCGC<br>G |
| 1 | GCGCVTGCG<br>CV | ZDHC14        | - | 141 | 151 | 5.43E-<br>06 | 0.0101 | GCGCGCGCGC<br>G |
| 1 | GCGCVTGCG<br>CV | MIF4GD        | - | 160 | 170 | 5.43E-<br>06 | 0.0101 | GCGCGCGCGC<br>G |
| 1 | GCGCVTGCG<br>CV | PANK1         | + | 22  | 32  | 5.43E-<br>06 | 0.0101 | GCGCGCGCGC<br>G |
| 1 | GCGCVTGCG<br>CV | PRR12         | + | 47  | 57  | 5.43E-<br>06 | 0.0101 | GCGCGCGCGC<br>G |
| 1 | GCGCVTGCG<br>CV | C6orf48       | + | 58  | 68  | 5.43E-<br>06 | 0.0101 | GCGCGCGCGC<br>G |
| 1 | GCGCVTGCG<br>CV | DHX15         | + | 73  | 83  | 5.43E-<br>06 | 0.0101 | GCGCGCGCGC<br>G |
| 1 | GCGCVTGCG<br>CV | DHX15         | + | 75  | 85  | 5.43E-<br>06 | 0.0101 | GCGCGCGCGC<br>G |
| 1 | GCGCVTGCG<br>CV | PPP5D1        | + | 82  | 92  | 5.43E-<br>06 | 0.0101 | GCGCGCGCGC<br>G |
| 1 | GCGCVTGCG<br>CV | KDEL2         | + | 135 | 145 | 5.43E-<br>06 | 0.0101 | GCGCGCGCGC<br>G |
| 1 | GCGCVTGCG<br>CV | NSF           | + | 137 | 147 | 5.43E-<br>06 | 0.0101 | GCGCGCGCGC<br>G |
| 1 | GCGCVTGCG<br>CV | KDEL2         | + | 137 | 147 | 5.43E-<br>06 | 0.0101 | GCGCGCGCGC<br>G |
| 1 | GCGCVTGCG<br>CV | MBD6          | + | 148 | 158 | 5.43E-<br>06 | 0.0101 | GCGCGCGCGC<br>G |
| 1 | GCGCVTGCG<br>CV | AGO2          | + | 165 | 175 | 5.43E-<br>06 | 0.0101 | GCGCGCGCGC<br>G |
| 1 | GCGCVTGCG<br>CV | MRPL34        | - | 87  | 97  | 5.54E-<br>06 | 0.0103 | GAGCTGCGC<br>C  |
| 1 | GCGCVTGCG<br>CV | AHNAK         | + | 18  | 28  | 5.54E-<br>06 | 0.0103 | GAGCTGCGC<br>C  |
| 1 | GCGCVTGCG<br>CV | MIR1199       | + | 100 | 110 | 5.54E-<br>06 | 0.0103 | GAGCTGCGC<br>C  |
| 1 | GCGCVTGCG<br>CV | PIK3C2B       | - | 190 | 200 | 5.66E-<br>06 | 0.0104 | GAGCGTGCGC<br>G |
| 1 | GCGCVTGCG<br>CV | RP11-68I18.10 | + | 138 | 148 | 5.66E-<br>06 | 0.0104 | GAGCGTGCGC<br>G |
| 1 | GCGCVTGCG<br>CV | FAM195B       | + | 86  | 96  | 5.93E-<br>06 | 0.0108 | GCGCCTGTGC<br>A |
| 1 | GCGCVTGCG<br>CV | EIF3K         | - | 3   | 13  | 6.23E-<br>06 | 0.0108 | GCGCAGGCG<br>CC |
| 1 | GCGCVTGCG<br>CV | CANX          | - | 4   | 14  | 6.23E-<br>06 | 0.0108 | GCGCAGGCG<br>CC |
| 1 | GCGCVTGCG<br>CV | TCTE3         | - | 4   | 14  | 6.23E-<br>06 | 0.0108 | GCGCAGGCG<br>CC |
| 1 | GCGCVTGCG<br>CV | DLGAP4        | - | 6   | 16  | 6.23E-<br>06 | 0.0108 | GCGGCTGCGC<br>C |
| 1 | GCGCVTGCG<br>CV | RP1-122P22.4  | - | 9   | 19  | 6.23E-<br>06 | 0.0108 | GCGCAGGCG<br>CC |
| 1 | GCGCVTGCG<br>CV | RP1-101K10.6  | - | 27  | 37  | 6.23E-<br>06 | 0.0108 | GCGCAGGCG<br>CC |

|   |                 |              |   |     |     |              |        |                 |
|---|-----------------|--------------|---|-----|-----|--------------|--------|-----------------|
| 1 | GCGCVTGCG<br>CV | SKP1         | - | 41  | 51  | 6.23E-<br>06 | 0.0108 | GCGCAGGCG<br>CC |
| 1 | GCGCVTGCG<br>CV | KDM2A        | - | 59  | 69  | 6.23E-<br>06 | 0.0108 | GCGCAGGCG<br>CC |
| 1 | GCGCVTGCG<br>CV | EED          | - | 69  | 79  | 6.23E-<br>06 | 0.0108 | GCGCAGGCG<br>CC |
| 1 | GCGCVTGCG<br>CV | ACTL6A       | - | 77  | 87  | 6.23E-<br>06 | 0.0108 | GCGGCTGCGC<br>C |
| 1 | GCGCVTGCG<br>CV | TOMM7        | - | 89  | 99  | 6.23E-<br>06 | 0.0108 | GCGCAGGCG<br>CC |
| 1 | GCGCVTGCG<br>CV | JAGN1        | - | 94  | 104 | 6.23E-<br>06 | 0.0108 | GCGCAGGCG<br>CC |
| 1 | GCGCVTGCG<br>CV | TMEM106C     | - | 118 | 128 | 6.23E-<br>06 | 0.0108 | GCGCAGGCG<br>CC |
| 1 | GCGCVTGCG<br>CV | BRK1         | - | 175 | 185 | 6.23E-<br>06 | 0.0108 | GCGCAGGCG<br>CC |
| 1 | GCGCVTGCG<br>CV | CISD1        | - | 191 | 201 | 6.23E-<br>06 | 0.0108 | GCGCAGGCG<br>CC |
| 1 | GCGCVTGCG<br>CV | GS1-124K5.13 | + | 10  | 20  | 6.23E-<br>06 | 0.0108 | GCGGCTGCGC<br>C |
| 1 | GCGCVTGCG<br>CV | RABGGTB      | + | 11  | 21  | 6.23E-<br>06 | 0.0108 | GCGCAGGCG<br>CC |
| 1 | GCGCVTGCG<br>CV | TCEB2        | + | 39  | 49  | 6.23E-<br>06 | 0.0108 | GCGGCTGCGC<br>C |
| 1 | GCGCVTGCG<br>CV | PSAP         | + | 87  | 97  | 6.23E-<br>06 | 0.0108 | GCGCAGGCG<br>CC |
| 1 | GCGCVTGCG<br>CV | UGP2         | + | 91  | 101 | 6.23E-<br>06 | 0.0108 | GCGGCTGCGC<br>C |
| 1 | GCGCVTGCG<br>CV | LRRC75A-AS1  | + | 97  | 107 | 6.23E-<br>06 | 0.0108 | GCGCAGGCG<br>CC |
| 1 | GCGCVTGCG<br>CV | MACF1        | + | 126 | 136 | 6.23E-<br>06 | 0.0108 | GCGGCTGCGC<br>C |
| 1 | GCGCVTGCG<br>CV | STIM2        | + | 126 | 136 | 6.23E-<br>06 | 0.0108 | GCGCAGGCG<br>CC |
| 1 | GCGCVTGCG<br>CV | NDUFA8       | + | 131 | 141 | 6.23E-<br>06 | 0.0108 | GCGCAGGCG<br>CC |
| 1 | GCGCVTGCG<br>CV | SFXN4        | + | 32  | 42  | 6.32E-<br>06 | 0.0109 | GCGGGTGCGC<br>G |
| 1 | GCGCVTGCG<br>CV | OMA1         | + | 141 | 151 | 6.32E-<br>06 | 0.0109 | GCGGGTGCGC<br>G |
| 1 | GCGCVTGCG<br>CV | PSMA7        | + | 165 | 175 | 6.32E-<br>06 | 0.0109 | GCGGGTGCGC<br>G |
| 1 | GCGCVTGCG<br>CV | SMG7         | - | 6   | 16  | 6.55E-<br>06 | 0.0112 | GCGCCTGTGC<br>G |
| 1 | GCGCVTGCG<br>CV | YARS2        | - | 23  | 33  | 6.55E-<br>06 | 0.0112 | GCGCATGCC<br>G  |
| 1 | GCGCVTGCG<br>CV | STIM2        | - | 103 | 113 | 6.55E-<br>06 | 0.0112 | GCGCATGCC<br>G  |
| 1 | GCGCVTGCG<br>CV | UBR7         | - | 52  | 62  | 6.76E-<br>06 | 0.0113 | CCGCCTGCGC<br>C |
| 1 | GCGCVTGCG<br>CV | FOXP4        | - | 76  | 86  | 6.76E-<br>06 | 0.0113 | CCGCCTGCGC<br>C |
| 1 | GCGCVTGCG<br>CV | DAZAP1       | - | 85  | 95  | 6.76E-<br>06 | 0.0113 | GCCCCTGCGC<br>A |

|   |                 |               |   |     |     |              |        |                 |
|---|-----------------|---------------|---|-----|-----|--------------|--------|-----------------|
| 1 | GCGCVTGCG<br>CV | CDKN1C        | - | 186 | 196 | 6.76E-<br>06 | 0.0113 | CCGCCTGCGC<br>C |
| 1 | GCGCVTGCG<br>CV | AFF1          | + | 39  | 49  | 6.76E-<br>06 | 0.0113 | GCCCCTGCGC<br>A |
| 1 | GCGCVTGCG<br>CV | PLEC          | + | 53  | 63  | 6.76E-<br>06 | 0.0113 | CCGCCTGCGC<br>C |
| 1 | GCGCVTGCG<br>CV | TMEM141       | + | 74  | 84  | 6.76E-<br>06 | 0.0113 | CCGCCTGCGC<br>C |
| 1 | GCGCVTGCG<br>CV | BNIP3         | + | 78  | 88  | 6.76E-<br>06 | 0.0113 | GCCCCTGCGC<br>A |
| 1 | GCGCVTGCG<br>CV | NATD1         | + | 154 | 164 | 6.76E-<br>06 | 0.0113 | CCGCCTGCGC<br>C |
| 1 | GCGCVTGCG<br>CV | ASCC3         | - | 44  | 54  | 6.85E-<br>06 | 0.0114 | CCGCGTGCGC<br>G |
| 1 | GCGCVTGCG<br>CV | LRP4-AS1      | - | 50  | 60  | 6.96E-<br>06 | 0.0116 | GCGCGTGCCC<br>A |
| 1 | GCGCVTGCG<br>CV | UCHL3         | - | 41  | 51  | 7.10E-<br>06 | 0.0118 | ACGCATGCGC<br>C |
| 1 | GCGCVTGCG<br>CV | MRPL17        | - | 118 | 128 | 7.10E-<br>06 | 0.0118 | ACGCATGCGC<br>C |
| 1 | GCGCVTGCG<br>CV | EZH1          | + | 40  | 50  | 7.29E-<br>06 | 0.0118 | GCGCACGCGC<br>C |
| 1 | GCGCVTGCG<br>CV | CTSC          | + | 44  | 54  | 7.29E-<br>06 | 0.0118 | GCGCACGCGC<br>C |
| 1 | GCGCVTGCG<br>CV | MAST3         | + | 45  | 55  | 7.29E-<br>06 | 0.0118 | GCCCCTGCGC<br>G |
| 1 | GCGCVTGCG<br>CV | BNIP3         | + | 45  | 55  | 7.29E-<br>06 | 0.0118 | GCGCACGCGC<br>C |
| 1 | GCGCVTGCG<br>CV | TMEM135       | + | 65  | 75  | 7.29E-<br>06 | 0.0118 | GCGCACGCGC<br>C |
| 1 | GCGCVTGCG<br>CV | EIF3K         | + | 70  | 80  | 7.29E-<br>06 | 0.0118 | GCGCACGCGC<br>C |
| 1 | GCGCVTGCG<br>CV | HMGN1P20      | + | 72  | 82  | 7.29E-<br>06 | 0.0118 | GCGCACGCGC<br>C |
| 1 | GCGCVTGCG<br>CV | TMEM14B       | + | 75  | 85  | 7.29E-<br>06 | 0.0118 | GCGCACGCGC<br>C |
| 1 | GCGCVTGCG<br>CV | SNRNP70       | - | 75  | 85  | 7.29E-<br>06 | 0.0118 | GCGCACGCGC<br>C |
| 1 | GCGCVTGCG<br>CV | KMT2C         | + | 88  | 98  | 7.29E-<br>06 | 0.0118 | GCCCCTGCGC<br>G |
| 1 | GCGCVTGCG<br>CV | SLC9B1        | + | 111 | 121 | 7.29E-<br>06 | 0.0118 | GCCCCTGCGC<br>G |
| 1 | GCGCVTGCG<br>CV | PDRG1         | - | 158 | 168 | 7.29E-<br>06 | 0.0118 | GCGCACGCGC<br>C |
| 1 | GCGCVTGCG<br>CV | TBC1D2B       | + | 124 | 134 | 7.50E-<br>06 | 0.012  | GCGCGGGCG<br>CC |
| 1 | GCGCVTGCG<br>CV | FOXK1         | - | 125 | 135 | 7.50E-<br>06 | 0.012  | GCGCGGGCG<br>CC |
| 1 | GCGCVTGCG<br>CV | RPS12         | - | 169 | 179 | 7.81E-<br>06 | 0.0125 | GCGCATGTGC<br>A |
| 1 | GCGCVTGCG<br>CV | PDZD2         | - | 4   | 14  | 7.90E-<br>06 | 0.0126 | GCGCCTGCC<br>C  |
| 1 | GCGCVTGCG<br>CV | RP11-1055B8.4 | + | 47  | 57  | 7.90E-<br>06 | 0.0126 | GCGCCTGCC<br>C  |

|   |                 |              |   |     |     |              |        |                 |
|---|-----------------|--------------|---|-----|-----|--------------|--------|-----------------|
| 1 | GCGCVTGCG<br>CV | RP11-15I20.1 | + | 176 | 186 | 7.90E-<br>06 | 0.0126 | GCGCCTGCC<br>C  |
| 1 | GCGCVTGCG<br>CV | MIF4GD       | - | 154 | 164 | 8.00E-<br>06 | 0.0127 | GCGCGTGCC<br>G  |
| 1 | GCGCVTGCG<br>CV | BTBD3        | - | 172 | 182 | 8.00E-<br>06 | 0.0127 | GCGCGTGCC<br>G  |
| 1 | GCGCVTGCG<br>CV | POM121C      | - | 51  | 61  | 8.36E-<br>06 | 0.0132 | GCGCATGTGC<br>G |
| 1 | GCGCVTGCG<br>CV | POM121       | - | 71  | 81  | 8.36E-<br>06 | 0.0132 | GCGCATGTGC<br>G |
| 1 | GCGCVTGCG<br>CV | EID3         | - | 96  | 106 | 8.61E-<br>06 | 0.0135 | GCCCATGCGC<br>A |
| 1 | GCGCVTGCG<br>CV | TMEM251      | - | 18  | 28  | 8.80E-<br>06 | 0.0135 | GCGCGCGCGC<br>C |
| 1 | GCGCVTGCG<br>CV | DMXL2        | - | 27  | 37  | 8.80E-<br>06 | 0.0135 | GCGCGCGCGC<br>C |
| 1 | GCGCVTGCG<br>CV | NSF          | + | 40  | 50  | 8.80E-<br>06 | 0.0135 | GCGCGCGCGC<br>C |
| 1 | GCGCVTGCG<br>CV | PRR12        | + | 49  | 59  | 8.80E-<br>06 | 0.0135 | GCGCGCGCGC<br>C |
| 1 | GCGCVTGCG<br>CV | AGO4         | - | 66  | 76  | 8.80E-<br>06 | 0.0135 | GCGCGCGCGC<br>C |
| 1 | GCGCVTGCG<br>CV | PPP5D1       | - | 81  | 91  | 8.80E-<br>06 | 0.0135 | GCGCGCGCGC<br>C |
| 1 | GCGCVTGCG<br>CV | KDELR2       | + | 139 | 149 | 8.80E-<br>06 | 0.0135 | GCGCGCGCGC<br>C |
| 1 | GCGCVTGCG<br>CV | ZDHHC14      | + | 142 | 152 | 8.80E-<br>06 | 0.0135 | GCGCGCGCGC<br>C |
| 1 | GCGCVTGCG<br>CV | NSF          | - | 136 | 146 | 8.80E-<br>06 | 0.0135 | GCGCGCGCGC<br>C |
| 1 | GCGCVTGCG<br>CV | MIF4GD       | + | 161 | 171 | 8.80E-<br>06 | 0.0135 | GCGCGCGCGC<br>C |
| 1 | GCGCVTGCG<br>CV | AGO2         | - | 164 | 174 | 8.80E-<br>06 | 0.0135 | GCGCGCGCGC<br>C |
| 1 | GCGCVTGCG<br>CV | DAD1         | + | 38  | 48  | 8.94E-<br>06 | 0.0137 | GCGTCTGCGC<br>A |
| 1 | GCGCVTGCG<br>CV | MRPL18       | - | 99  | 109 | 8.94E-<br>06 | 0.0137 | GCGTCTGCGC<br>A |
| 1 | GCGCVTGCG<br>CV | POM121       | + | 26  | 36  | 9.19E-<br>06 | 0.014  | GCGCGTGTGC<br>A |
| 1 | GCGCVTGCG<br>CV | RP4-591C20.9 | + | 52  | 62  | 9.19E-<br>06 | 0.014  | GCGCGTGTGC<br>A |
| 1 | GCGCVTGCG<br>CV | RPS12        | + | 170 | 180 | 9.47E-<br>06 | 0.0144 | GCACATGCGC<br>A |
| 1 | GCGCVTGCG<br>CV | NDUFAF5      | + | 132 | 142 | 9.79E-<br>06 | 0.0149 | GCGCTGGCGC<br>A |
| 1 | GCGCVTGCG<br>CV | THNSL1       | - | 83  | 93  | 1.01E-<br>05 | 0.0153 | GCGCCTGTGC<br>C |
| 1 | GCGCVTGCG<br>CV | BTBD3        | + | 104 | 114 | 1.01E-<br>05 | 0.0153 | GCGCATGCC<br>C  |
| 1 | GCGCVTGCG<br>CV | ZMIZ1        | + | 173 | 183 | 1.01E-<br>05 | 0.0153 | ACGCCGGCGC<br>A |
| 1 | GCGCVTGCG<br>CV | XPOT         | + | 50  | 60  | 1.02E-<br>05 | 0.0154 | GCGCGTGTGC<br>G |

|   |                 |            |   |     |     |              |        |                  |
|---|-----------------|------------|---|-----|-----|--------------|--------|------------------|
| 1 | GCGCVTGCG<br>CV | RPS15      | + | 69  | 79  | 1.02E-<br>05 | 0.0154 | GCGCGTGTGC<br>G  |
| 1 | GCGCVTGCG<br>CV | RAN        | - | 37  | 47  | 1.05E-<br>05 | 0.0156 | CCGCGTGCGC<br>C  |
| 1 | GCGCVTGCG<br>CV | KMT2B      | - | 48  | 58  | 1.05E-<br>05 | 0.0156 | GCCCCGTGCGC<br>A |
| 1 | GCGCVTGCG<br>CV | AP000253.1 | + | 66  | 76  | 1.05E-<br>05 | 0.0156 | CCGCGTGCGC<br>C  |
| 1 | GCGCVTGCG<br>CV | ITGB3BP    | - | 82  | 92  | 1.06E-<br>05 | 0.0157 | GAGCCGGCG<br>CA  |
| 1 | GCGCVTGCG<br>CV | MACF1      | - | 131 | 141 | 1.06E-<br>05 | 0.0157 | GAGCCGGCG<br>CA  |
| 1 | GCGCVTGCG<br>CV | POM121C    | + | 52  | 62  | 1.07E-<br>05 | 0.0158 | GCACATGCGC<br>G  |
| 1 | GCGCVTGCG<br>CV | POM121     | + | 72  | 82  | 1.07E-<br>05 | 0.0158 | GCACATGCGC<br>G  |
| 1 | GCGCVTGCG<br>CV | PDIA3P2    | - | 2   | 12  | 1.08E-<br>05 | 0.0158 | GCGCTGGCGC<br>G  |
| 1 | GCGCVTGCG<br>CV | RSPH10B    | + | 22  | 32  | 1.08E-<br>05 | 0.0158 | GCGCTGGCGC<br>G  |
| 1 | GCGCVTGCG<br>CV | ARHGAP32   | + | 84  | 94  | 1.08E-<br>05 | 0.0158 | GCGCTGGCGC<br>G  |
| 1 | GCGCVTGCG<br>CV | FOXP2      | + | 116 | 126 | 1.09E-<br>05 | 0.0158 | ACGCCGGCGC<br>G  |
| 1 | GCGCVTGCG<br>CV | ST13       | + | 32  | 42  | 1.10E-<br>05 | 0.0158 | GCGGCGGCG<br>CA  |
| 1 | GCGCVTGCG<br>CV | SYNJ2      | + | 62  | 72  | 1.10E-<br>05 | 0.0158 | GCGGCGGCG<br>CA  |
| 1 | GCGCVTGCG<br>CV | MPRIIP1    | - | 74  | 84  | 1.10E-<br>05 | 0.0158 | GCGGCGGCG<br>CA  |
| 1 | GCGCVTGCG<br>CV | ATXN10     | + | 90  | 100 | 1.10E-<br>05 | 0.0158 | GCGGCGGCG<br>CA  |
| 1 | GCGCVTGCG<br>CV | ADCY9      | + | 116 | 126 | 1.10E-<br>05 | 0.0158 | GCGGCGGCG<br>CA  |
| 1 | GCGCVTGCG<br>CV | H1F0       | + | 131 | 141 | 1.10E-<br>05 | 0.0158 | GCGGCGGCG<br>CA  |
| 1 | GCGCVTGCG<br>CV | NDUFAB1    | + | 133 | 143 | 1.10E-<br>05 | 0.0158 | GCGGCGGCG<br>CA  |
| 1 | GCGCVTGCG<br>CV | ZNHIT3     | + | 136 | 146 | 1.10E-<br>05 | 0.0158 | GCGGCGGCG<br>CA  |
| 1 | GCGCVTGCG<br>CV | SPTB       | - | 133 | 143 | 1.10E-<br>05 | 0.0158 | GCGGCGGCG<br>CA  |
| 1 | GCGCVTGCG<br>CV | ABTB2      | - | 161 | 171 | 1.10E-<br>05 | 0.0158 | GCGGCGGCG<br>CA  |
| 1 | GCGCVTGCG<br>CV | MAPK8IP3   | + | 16  | 26  | 1.11E-<br>05 | 0.0159 | GCCCCCTGCGC<br>C |
| 1 | GCGCVTGCG<br>CV | LRCH1      | - | 50  | 60  | 1.11E-<br>05 | 0.0159 | GCCCCCTGCGC<br>C |
| 1 | GCGCVTGCG<br>CV | RBP1       | + | 167 | 177 | 1.11E-<br>05 | 0.0159 | GCCCCCTGCGC<br>C |
| 1 | GCGCVTGCG<br>CV | NRBP2      | - | 48  | 58  | 1.16E-<br>05 | 0.0164 | GAGCCGGCG<br>CG  |
| 1 | GCGCVTGCG<br>CV | ZNF767P    | - | 71  | 81  | 1.16E-<br>05 | 0.0164 | GAGCCGGCG<br>CG  |

|   |                 |                   |   |     |     |              |        |                 |
|---|-----------------|-------------------|---|-----|-----|--------------|--------|-----------------|
| 1 | GCGCVTGCG<br>CV | TMEM38B           | + | 105 | 115 | 1.16E-<br>05 | 0.0164 | GAGCCGGCG<br>CG |
| 1 | GCGCVTGCG<br>CV | DDX18             | - | 137 | 147 | 1.16E-<br>05 | 0.0164 | GCACGTGCGC<br>A |
| 1 | GCGCVTGCG<br>CV | UROS              | - | 94  | 104 | 1.19E-<br>05 | 0.0165 | GCGCTCGCGC<br>A |
| 1 | GCGCVTGCG<br>CV | ULK1              | - | 80  | 90  | 1.20E-<br>05 | 0.0165 | ACGCCCGCGC<br>A |
| 1 | GCGCVTGCG<br>CV | NRBP2             | - | 191 | 201 | 1.21E-<br>05 | 0.0165 | CCGCCGGCGC<br>A |
| 1 | GCGCVTGCG<br>CV | KCTD16            | + | 1   | 11  | 1.23E-<br>05 | 0.0165 | GAGCTTGCGC<br>A |
| 1 | GCGCVTGCG<br>CV | AL353644.10       | + | 84  | 94  | 1.23E-<br>05 | 0.0165 | GCGCGTGCCC<br>C |
| 1 | GCGCVTGCG<br>CV | LDHAL6B           | - | 101 | 111 | 1.23E-<br>05 | 0.0165 | GCGCGTGCCC<br>C |
| 1 | GCGCVTGCG<br>CV | MLLT4             | + | 5   | 15  | 1.26E-<br>05 | 0.0165 | GCGGCGGCG<br>CG |
| 1 | GCGCVTGCG<br>CV | FAM193B           | + | 9   | 19  | 1.26E-<br>05 | 0.0165 | GCGGCGGCG<br>CG |
| 1 | GCGCVTGCG<br>CV | BCORL1            | + | 9   | 19  | 1.26E-<br>05 | 0.0165 | GCGGCGGCG<br>CG |
| 1 | GCGCVTGCG<br>CV | ZNF503            | + | 16  | 26  | 1.26E-<br>05 | 0.0165 | GCGGCGGCG<br>CG |
| 1 | GCGCVTGCG<br>CV | MLLT4             | + | 24  | 34  | 1.26E-<br>05 | 0.0165 | GCGGCGGCG<br>CG |
| 1 | GCGCVTGCG<br>CV | TMEM135           | - | 16  | 26  | 1.26E-<br>05 | 0.0165 | GCGGCGGCG<br>CG |
| 1 | GCGCVTGCG<br>CV | CTD-<br>2154B17.4 | + | 33  | 43  | 1.26E-<br>05 | 0.0165 | GCGGCGGCG<br>CG |
| 1 | GCGCVTGCG<br>CV | MIR1281           | + | 41  | 51  | 1.26E-<br>05 | 0.0165 | GCGGCGGCG<br>CG |
| 1 | GCGCVTGCG<br>CV | MEX3D             | + | 53  | 63  | 1.26E-<br>05 | 0.0165 | GCGGCGGCG<br>CG |
| 1 | GCGCVTGCG<br>CV | USP42             | + | 53  | 63  | 1.26E-<br>05 | 0.0165 | GCGGCGGCG<br>CG |
| 1 | GCGCVTGCG<br>CV | FOXK1             | - | 49  | 59  | 1.26E-<br>05 | 0.0165 | GCGGCGGCG<br>CG |
| 1 | GCGCVTGCG<br>CV | AC073046.25       | + | 65  | 75  | 1.26E-<br>05 | 0.0165 | GCGGCGGCG<br>CG |
| 1 | GCGCVTGCG<br>CV | BRD4              | + | 65  | 75  | 1.26E-<br>05 | 0.0165 | GCGGCGGCG<br>CG |
| 1 | GCGCVTGCG<br>CV | MPRIP             | + | 71  | 81  | 1.26E-<br>05 | 0.0165 | GCGGCGGCG<br>CG |
| 1 | GCGCVTGCG<br>CV | RP11-700A24.1     | - | 61  | 71  | 1.26E-<br>05 | 0.0165 | GCGGCGGCG<br>CG |
| 1 | GCGCVTGCG<br>CV | IRS2              | + | 72  | 82  | 1.26E-<br>05 | 0.0165 | GCGGCGGCG<br>CG |
| 1 | GCGCVTGCG<br>CV | MCM6              | + | 72  | 82  | 1.26E-<br>05 | 0.0165 | GCGGCGGCG<br>CG |
| 1 | GCGCVTGCG<br>CV | COBL              | - | 63  | 73  | 1.26E-<br>05 | 0.0165 | GCGGCGGCG<br>CG |
| 1 | GCGCVTGCG<br>CV | MAGOH             | - | 75  | 85  | 1.26E-<br>05 | 0.0165 | GCGGCGGCG<br>CG |

|   |                 |               |   |     |     |              |        |                 |
|---|-----------------|---------------|---|-----|-----|--------------|--------|-----------------|
| 1 | GCGCVTGCG<br>CV | FOXP4         | + | 86  | 96  | 1.26E-<br>05 | 0.0165 | GCGGCGGCG<br>CG |
| 1 | GCGCVTGCG<br>CV | RP11-214D15.2 | + | 91  | 101 | 1.26E-<br>05 | 0.0165 | GCGGCGGCG<br>CG |
| 1 | GCGCVTGCG<br>CV | DAZAP1        | + | 94  | 104 | 1.26E-<br>05 | 0.0165 | GCGGCGGCG<br>CG |
| 1 | GCGCVTGCG<br>CV | USP46         | - | 91  | 101 | 1.26E-<br>05 | 0.0165 | GCGGCGGCG<br>CG |
| 1 | GCGCVTGCG<br>CV | DAZAP1        | + | 102 | 112 | 1.26E-<br>05 | 0.0165 | GCGGCGGCG<br>CG |
| 1 | GCGCVTGCG<br>CV | SMG1          | + | 109 | 119 | 1.26E-<br>05 | 0.0165 | GCGGCGGCG<br>CG |
| 1 | GCGCVTGCG<br>CV | CCT6A         | + | 111 | 121 | 1.26E-<br>05 | 0.0165 | GCGGCGGCG<br>CG |
| 1 | GCGCVTGCG<br>CV | CHRD12        | - | 106 | 116 | 1.26E-<br>05 | 0.0165 | GCGGCGGCG<br>CG |
| 1 | GCGCVTGCG<br>CV | EP400         | - | 109 | 119 | 1.26E-<br>05 | 0.0165 | GCGGCGGCG<br>CG |
| 1 | GCGCVTGCG<br>CV | PXN           | + | 127 | 137 | 1.26E-<br>05 | 0.0165 | GCGGCGGCG<br>CG |
| 1 | GCGCVTGCG<br>CV | C1orf233      | + | 129 | 139 | 1.26E-<br>05 | 0.0165 | GCGGCGGCG<br>CG |
| 1 | GCGCVTGCG<br>CV | DIP2A         | + | 131 | 141 | 1.26E-<br>05 | 0.0165 | GCGGCGGCG<br>CG |
| 1 | GCGCVTGCG<br>CV | CEP350        | - | 124 | 134 | 1.26E-<br>05 | 0.0165 | GCGGCGGCG<br>CG |
| 1 | GCGCVTGCG<br>CV | POLR2L        | - | 126 | 136 | 1.26E-<br>05 | 0.0165 | GCGGCGGCG<br>CG |
| 1 | GCGCVTGCG<br>CV | ORAOV1        | - | 149 | 159 | 1.26E-<br>05 | 0.0165 | GCGGCGGCG<br>CG |
| 1 | GCGCVTGCG<br>CV | C17orf58      | - | 158 | 168 | 1.26E-<br>05 | 0.0165 | GCGGCGGCG<br>CG |
| 1 | GCGCVTGCG<br>CV | PRRC2B        | - | 170 | 180 | 1.26E-<br>05 | 0.0165 | GCGGCGGCG<br>CG |
| 1 | GCGCVTGCG<br>CV | C17orf58      | - | 190 | 200 | 1.26E-<br>05 | 0.0165 | GCGGCGGCG<br>CG |
| 1 | GCGCVTGCG<br>CV | PSMB3         | + | 116 | 126 | 1.33E-<br>05 | 0.0174 | GCGGTTGCGC<br>A |
| 1 | GCGCVTGCG<br>CV | DIRAS3        | + | 43  | 53  | 1.38E-<br>05 | 0.0179 | ACGCAGGCG<br>CA |
| 1 | GCGCVTGCG<br>CV | MICAL3        | + | 68  | 78  | 1.38E-<br>05 | 0.0179 | GCGCTCGCGC<br>G |
| 1 | GCGCVTGCG<br>CV | TMEM106C      | - | 75  | 85  | 1.38E-<br>05 | 0.0179 | GCGCTCGCGC<br>G |
| 1 | GCGCVTGCG<br>CV | ERGIC3        | - | 80  | 90  | 1.38E-<br>05 | 0.0179 | ACGCAGGCG<br>CA |
| 1 | GCGCVTGCG<br>CV | CLASRP        | - | 134 | 144 | 1.38E-<br>05 | 0.0179 | GCGCTCGCGC<br>G |
| 1 | GCGCVTGCG<br>CV | TMEM38B       | - | 158 | 168 | 1.38E-<br>05 | 0.0179 | GCGCTCGCGC<br>G |
| 1 | GCGCVTGCG<br>CV | TRAK1         | + | 70  | 80  | 1.39E-<br>05 | 0.018  | ACGCCCGCGC<br>G |
| 1 | GCGCVTGCG<br>CV | HIST2H4A      | + | 25  | 35  | 1.41E-<br>05 | 0.0181 | CCGCCGCGC<br>G  |

|   |                 |              |   |     |     |              |        |                 |
|---|-----------------|--------------|---|-----|-----|--------------|--------|-----------------|
| 1 | GCGCVTGCG<br>CV | PRKACA       | - | 49  | 59  | 1.41E-<br>05 | 0.0181 | GCGGCCGCGC<br>A |
| 1 | GCGCVTGCG<br>CV | TJP2         | - | 24  | 34  | 1.47E-<br>05 | 0.0188 | GAGCCCGCGC<br>G |
| 1 | GCGCVTGCG<br>CV | RPS5         | - | 115 | 125 | 1.47E-<br>05 | 0.0188 | GAGCCCGCGC<br>G |
| 1 | GCGCVTGCG<br>CV | NSF          | + | 34  | 44  | 1.47E-<br>05 | 0.0188 | GAGCCCGCGC<br>G |
| 1 | GCGCVTGCG<br>CV | AKAP17A      | + | 85  | 95  | 1.47E-<br>05 | 0.0188 | GAGCCCGCGC<br>G |
| 1 | GCGCVTGCG<br>CV | COA7         | - | 125 | 135 | 1.51E-<br>05 | 0.0192 | GCGCCGCCCC<br>A |
| 1 | GCGCVTGCG<br>CV | ARRDC2       | + | 141 | 151 | 1.51E-<br>05 | 0.0192 | GCGCCGCCCC<br>A |
| 1 | GCGCVTGCG<br>CV | SLC39A9      | - | 8   | 18  | 1.53E-<br>05 | 0.0193 | GCGGTTGCGC<br>G |
| 1 | GCGCVTGCG<br>CV | POFUT1       | - | 48  | 58  | 1.53E-<br>05 | 0.0193 | CCGCCCGCGC<br>A |
| 1 | GCGCVTGCG<br>CV | MAST3        | - | 50  | 60  | 1.53E-<br>05 | 0.0193 | CCGCCCGCGC<br>A |
| 1 | GCGCVTGCG<br>CV | C1GALT1C1    | - | 99  | 109 | 1.53E-<br>05 | 0.0193 | CCGCCCGCGC<br>A |
| 1 | GCGCVTGCG<br>CV | C6orf132     | - | 142 | 152 | 1.53E-<br>05 | 0.0193 | CCGCCCGCGC<br>A |
| 1 | GCGCVTGCG<br>CV | ING5         | + | 95  | 105 | 1.53E-<br>05 | 0.0193 | CCGCCCGCGC<br>A |
| 1 | GCGCVTGCG<br>CV | TM2D3        | - | 53  | 63  | 1.55E-<br>05 | 0.0194 | ACGCAGGCG<br>CG |
| 1 | GCGCVTGCG<br>CV | LRP4-AS1     | - | 84  | 94  | 1.55E-<br>05 | 0.0194 | ACGGCTGCGC<br>G |
| 1 | GCGCVTGCG<br>CV | CCNT1        | - | 165 | 175 | 1.55E-<br>05 | 0.0194 | ACGCAGGCG<br>CG |
| 1 | GCGCVTGCG<br>CV | DRG1         | - | 166 | 176 | 1.55E-<br>05 | 0.0194 | ACGCAGGCG<br>CG |
| 1 | GCGCVTGCG<br>CV | TEX22        | + | 12  | 22  | 1.55E-<br>05 | 0.0194 | ACGCAGGCG<br>CG |
| 1 | GCGCVTGCG<br>CV | SAP18        | + | 19  | 29  | 1.55E-<br>05 | 0.0194 | ACGCAGGCG<br>CG |
| 1 | GCGCVTGCG<br>CV | RPL18A       | + | 122 | 132 | 1.55E-<br>05 | 0.0194 | ACGGCTGCGC<br>G |
| 1 | GCGCVTGCG<br>CV | PDIA3P2      | - | 102 | 112 | 1.57E-<br>05 | 0.0194 | GCGGAGGCG<br>CA |
| 1 | GCGCVTGCG<br>CV | TBC1D2B      | + | 111 | 121 | 1.57E-<br>05 | 0.0194 | GCGGAGGCG<br>CA |
| 1 | GCGCVTGCG<br>CV | IQSEC2       | - | 10  | 20  | 1.60E-<br>05 | 0.0195 | GCGGCCGCGC<br>G |
| 1 | GCGCVTGCG<br>CV | WRB          | - | 117 | 127 | 1.60E-<br>05 | 0.0195 | GCGCCTGCGA<br>A |
| 1 | GCGCVTGCG<br>CV | RP11-52A20.2 | - | 130 | 140 | 1.60E-<br>05 | 0.0195 | CAGCCTGCGC<br>A |
| 1 | GCGCVTGCG<br>CV | AGO2         | - | 170 | 180 | 1.60E-<br>05 | 0.0195 | GCGGCCGCGC<br>G |
| 1 | GCGCVTGCG<br>CV | RPL41P2      | - | 171 | 181 | 1.60E-<br>05 | 0.0195 | CAGCCTGCGC<br>A |



|   |                 |         |   |     |     |              |        |                 |
|---|-----------------|---------|---|-----|-----|--------------|--------|-----------------|
| 1 | GCGCVTGCG<br>CV | STX1A   | - | 188 | 198 | 1.60E-<br>05 | 0.0195 | GCGGCCGCGC<br>G |
| 1 | GCGCVTGCG<br>CV | DOT1L   | + | 19  | 29  | 1.60E-<br>05 | 0.0195 | GCGGCCGCGC<br>G |
| 1 | GCGCVTGCG<br>CV | PRR5    | + | 52  | 62  | 1.60E-<br>05 | 0.0195 | CAGCCTGCGC<br>A |
| 1 | GCGCVTGCG<br>CV | FBXO6   | + | 95  | 105 | 1.60E-<br>05 | 0.0195 | GCGGCCGCGC<br>G |
| 1 | GCGCVTGCG<br>CV | ACTR10  | + | 114 | 124 | 1.60E-<br>05 | 0.0195 | GCGGCCGCGC<br>G |
| 1 | GCGCVTGCG<br>CV | HSDL1   | + | 156 | 166 | 1.60E-<br>05 | 0.0195 | GCGGCCGCGC<br>G |
| 1 | GCGCVTGCG<br>CV | ENO1    | - | 30  | 40  | 1.63E-<br>05 | 0.0198 | GAGGCTGCGC<br>G |
| 1 | GCGCVTGCG<br>CV | VWCE    | - | 32  | 42  | 1.63E-<br>05 | 0.0198 | GAGGCTGCGC<br>G |
| 1 | GCGCVTGCG<br>CV | PPIH    | - | 35  | 45  | 1.63E-<br>05 | 0.0198 | GAGCAGGCG<br>CG |
| 1 | GCGCVTGCG<br>CV | CRYBA2  | - | 95  | 105 | 1.63E-<br>05 | 0.0198 | GAGGCTGCGC<br>G |
| 1 | GCGCVTGCG<br>CV | MINOS1  | + | 58  | 68  | 1.65E-<br>05 | 0.0199 | GCGTCTGCGC<br>C |
| 1 | GCGCVTGCG<br>CV | YAE1D1  | - | 33  | 43  | 1.67E-<br>05 | 0.0201 | GCGTGTGCGC<br>G |
| 1 | GCGCVTGCG<br>CV | RPS15   | + | 71  | 81  | 1.67E-<br>05 | 0.0201 | GCGTGTGCGC<br>G |
| 1 | GCGCVTGCG<br>CV | CCT8    | - | 42  | 52  | 1.69E-<br>05 | 0.0202 | ACGCACGCGC<br>A |
| 1 | GCGCVTGCG<br>CV | LRP4    | - | 84  | 94  | 1.69E-<br>05 | 0.0202 | GCGCCGCCCC<br>G |
| 1 | GCGCVTGCG<br>CV | MRPL20  | - | 152 | 162 | 1.69E-<br>05 | 0.0202 | ACGCACGCGC<br>A |
| 1 | GCGCVTGCG<br>CV | APPL1   | - | 184 | 194 | 1.69E-<br>05 | 0.0202 | GCGCCGCCCC<br>G |
| 1 | GCGCVTGCG<br>CV | PIP5K1C | + | 83  | 93  | 1.69E-<br>05 | 0.0202 | GCGCCGCCCC<br>G |
| 1 | GCGCVTGCG<br>CV | ATP50   | - | 90  | 100 | 1.71E-<br>05 | 0.0204 | CCGCAGGCGC<br>A |
| 1 | GCGCVTGCG<br>CV | MARS2   | + | 68  | 78  | 1.71E-<br>05 | 0.0204 | CCGCTGCGC<br>A  |
| 1 | GCGCVTGCG<br>CV | PSMB1   | + | 181 | 191 | 1.71E-<br>05 | 0.0204 | CCGCAGGCGC<br>A |
| 1 | GCGCVTGCG<br>CV | PKD1P6  | - | 51  | 61  | 1.74E-<br>05 | 0.0206 | CCGCCGCGC<br>G  |
| 1 | GCGCVTGCG<br>CV | MAPRE1  | - | 142 | 152 | 1.74E-<br>05 | 0.0206 | CCGCCGCGC<br>G  |
| 1 | GCGCVTGCG<br>CV | ACAA2   | + | 39  | 49  | 1.74E-<br>05 | 0.0206 | CCGCCGCGC<br>G  |
| 1 | GCGCVTGCG<br>CV | FGF18   | + | 52  | 62  | 1.74E-<br>05 | 0.0206 | CCGCCGCGC<br>G  |
| 1 | GCGCVTGCG<br>CV | XPOT    | + | 172 | 182 | 1.74E-<br>05 | 0.0206 | CCGCCGCGC<br>G  |
| 1 | GCGCVTGCG<br>CV | SNHG3   | - | 75  | 85  | 1.76E-<br>05 | 0.0207 | AAGCATGCGC<br>A |

|   |                 |              |   |     |     |              |        |                 |
|---|-----------------|--------------|---|-----|-----|--------------|--------|-----------------|
| 1 | GCGCVTGCG<br>CV | IMPDH1P10    | - | 41  | 51  | 1.77E-<br>05 | 0.0207 | GCGGAGGCG<br>CG |
| 1 | GCGCVTGCG<br>CV | SDHC         | - | 187 | 197 | 1.77E-<br>05 | 0.0207 | GCGGAGGCG<br>CG |
| 1 | GCGCVTGCG<br>CV | SLC6A20      | + | 98  | 108 | 1.77E-<br>05 | 0.0207 | GCGGAGGCG<br>CG |
| 1 | GCGCVTGCG<br>CV | TSN          | + | 140 | 150 | 1.77E-<br>05 | 0.0207 | GCGGAGGCG<br>CG |
| 1 | GCGCVTGCG<br>CV | RP4-758J18.2 | + | 144 | 154 | 1.77E-<br>05 | 0.0207 | GCGGAGGCG<br>CG |
| 1 | GCGCVTGCG<br>CV | RPL10        | - | 2   | 12  | 1.81E-<br>05 | 0.0209 | GCGCCTGCGA<br>G |
| 1 | GCGCVTGCG<br>CV | RP11-454L9.2 | - | 63  | 73  | 1.81E-<br>05 | 0.0209 | GCGCCTGCGA<br>G |
| 1 | GCGCVTGCG<br>CV | MKKS         | - | 89  | 99  | 1.81E-<br>05 | 0.0209 | GAGCACGCG<br>CA |
| 1 | GCGCVTGCG<br>CV | TACC2        | + | 22  | 32  | 1.81E-<br>05 | 0.0209 | GAGCACGCG<br>CA |
| 1 | GCGCVTGCG<br>CV | EIF3K        | + | 85  | 95  | 1.81E-<br>05 | 0.0209 | GCGCCTGCGA<br>G |
| 1 | GCGCVTGCG<br>CV | QPCT         | + | 104 | 114 | 1.81E-<br>05 | 0.0209 | CAGCCTGCGC<br>G |
| 1 | GCGCVTGCG<br>CV | MNAT1        | + | 189 | 199 | 1.81E-<br>05 | 0.0209 | GCGCCTGCGA<br>G |
| 1 | GCGCVTGCG<br>CV | SPINT2       | - | 141 | 151 | 1.82E-<br>05 | 0.021  | GCGCTTGCCC<br>A |
| 1 | GCGCVTGCG<br>CV | CKS2         | - | 146 | 156 | 1.86E-<br>05 | 0.0212 | GAGCGGGCG<br>CA |
| 1 | GCGCVTGCG<br>CV | KMT2E        | + | 48  | 58  | 1.86E-<br>05 | 0.0212 | GAGCGGGCG<br>CA |
| 1 | GCGCVTGCG<br>CV | ITGB4        | - | 51  | 61  | 1.87E-<br>05 | 0.0212 | GCGCCCGCCC<br>A |
| 1 | GCGCVTGCG<br>CV | ARL3         | - | 52  | 62  | 1.87E-<br>05 | 0.0212 | GCGCCCGCCC<br>A |
| 1 | GCGCVTGCG<br>CV | NGRN         | - | 80  | 90  | 1.87E-<br>05 | 0.0212 | GCGCCCGCCC<br>A |
| 1 | GCGCVTGCG<br>CV | SH3BP2       | - | 96  | 106 | 1.87E-<br>05 | 0.0212 | GCGCCCGCCC<br>A |
| 1 | GCGCVTGCG<br>CV | ZNF767P      | - | 183 | 193 | 1.87E-<br>05 | 0.0212 | GCGCCCGCCC<br>A |
| 1 | GCGCVTGCG<br>CV | RAN          | - | 190 | 200 | 1.87E-<br>05 | 0.0212 | GCGCCCGCCC<br>A |
| 1 | GCGCVTGCG<br>CV | FOXK1        | + | 16  | 26  | 1.87E-<br>05 | 0.0212 | GCGCCCGCCC<br>A |
| 1 | GCGCVTGCG<br>CV | TMEM126A     | + | 91  | 101 | 1.87E-<br>05 | 0.0212 | GCGCCCGCCC<br>A |
| 1 | GCGCVTGCG<br>CV | FOXP1        | - | 9   | 19  | 1.92E-<br>05 | 0.0216 | GCGCTGGCGC<br>C |
| 1 | GCGCVTGCG<br>CV | POM121       | - | 57  | 67  | 1.92E-<br>05 | 0.0216 | ACGCACGCGC<br>G |
| 1 | GCGCVTGCG<br>CV | XPNPEP1      | - | 67  | 77  | 1.92E-<br>05 | 0.0216 | GCGCTGGCGC<br>C |
| 1 | GCGCVTGCG<br>CV | PACS1        | - | 80  | 90  | 1.92E-<br>05 | 0.0216 | ACGCACGCGC<br>G |

|   |                 |               |   |     |     |              |        |                 |
|---|-----------------|---------------|---|-----|-----|--------------|--------|-----------------|
| 1 | GCGCVTGCG<br>CV | EIF4EBP1      | - | 88  | 98  | 1.92E-<br>05 | 0.0216 | GCGCTGGCGC<br>C |
| 1 | GCGCVTGCG<br>CV | TEX30         | - | 108 | 118 | 1.92E-<br>05 | 0.0216 | ACGCACGCGC<br>G |
| 1 | GCGCVTGCG<br>CV | SDHAF2        | - | 84  | 94  | 1.96E-<br>05 | 0.0218 | CCGGCTGCGC<br>G |
| 1 | GCGCVTGCG<br>CV | PSMC4         | - | 95  | 105 | 1.96E-<br>05 | 0.0218 | CCGCAGGCGC<br>G |
| 1 | GCGCVTGCG<br>CV | RP11-307E17.8 | - | 103 | 113 | 1.96E-<br>05 | 0.0218 | CCGGCTGCGC<br>G |
| 1 | GCGCVTGCG<br>CV | TMEM187       | - | 128 | 138 | 1.96E-<br>05 | 0.0218 | CCGCAGGCGC<br>G |
| 1 | GCGCVTGCG<br>CV | NR4A3         | - | 130 | 140 | 1.96E-<br>05 | 0.0218 | CCGGCTGCGC<br>G |
| 1 | GCGCVTGCG<br>CV | MSL3P1        | - | 147 | 157 | 1.96E-<br>05 | 0.0218 | CCGGCTGCGC<br>G |
| 1 | GCGCVTGCG<br>CV | PEBP4         | + | 7   | 17  | 1.96E-<br>05 | 0.0218 | ACGCCGGCGC<br>C |
| 1 | GCGCVTGCG<br>CV | SNHG9         | + | 175 | 185 | 1.96E-<br>05 | 0.0218 | ACGCCGGCGC<br>C |
| 1 | GCGCVTGCG<br>CV | TMEM106C      | - | 85  | 95  | 1.97E-<br>05 | 0.0218 | ACGCGGGCG<br>CG |
| 1 | GCGCVTGCG<br>CV | ZNHIT3        | + | 109 | 119 | 1.97E-<br>05 | 0.0218 | ACGCGGGCG<br>CG |
| 1 | GCGCVTGCG<br>CV | LRR1          | - | 40  | 50  | 2.00E-<br>05 | 0.022  | GCGGGGGCG<br>CA |
| 1 | GCGCVTGCG<br>CV | APTX          | + | 49  | 59  | 2.00E-<br>05 | 0.022  | GCGGGGGCG<br>CA |
| 1 | GCGCVTGCG<br>CV | CHAD          | + | 61  | 71  | 2.00E-<br>05 | 0.022  | GCGGGGGCG<br>CA |
| 1 | GCGCVTGCG<br>CV | JAGN1         | + | 179 | 189 | 2.00E-<br>05 | 0.022  | GCGGGGGCG<br>CA |
| 1 | GCGCVTGCG<br>CV | GDAP1         | + | 83  | 93  | 2.03E-<br>05 | 0.0224 | GCCCGTGCGC<br>C |
| 1 | GCGCVTGCG<br>CV | SLX4          | - | 34  | 44  | 2.08E-<br>05 | 0.0227 | GAGCGGGCG<br>CG |
| 1 | GCGCVTGCG<br>CV | KIAA1522      | - | 49  | 59  | 2.08E-<br>05 | 0.0227 | GAGCGGGCG<br>CG |
| 1 | GCGCVTGCG<br>CV | SEMA5A        | - | 75  | 85  | 2.08E-<br>05 | 0.0227 | GAGCGGGCG<br>CG |
| 1 | GCGCVTGCG<br>CV | EPPK1         | + | 83  | 93  | 2.08E-<br>05 | 0.0227 | GAGCGGGCG<br>CG |
| 1 | GCGCVTGCG<br>CV | HIVEP2        | - | 140 | 150 | 2.11E-<br>05 | 0.0227 | GCGCCGGTGC<br>A |
| 1 | GCGCVTGCG<br>CV | LINC00674     | - | 178 | 188 | 2.11E-<br>05 | 0.0227 | GCGGCTGCC<br>A  |
| 1 | GCGCVTGCG<br>CV | VMAC          | - | 189 | 199 | 2.11E-<br>05 | 0.0227 | GCGCCGGTGC<br>A |
| 1 | GCGCVTGCG<br>CV | ARPC5         | + | 45  | 55  | 2.11E-<br>05 | 0.0227 | GCGCAGGCC<br>A  |
| 1 | GCGCVTGCG<br>CV | DHX15         | + | 83  | 93  | 2.11E-<br>05 | 0.0227 | GCGCAGGCC<br>A  |
| 1 | GCGCVTGCG<br>CV | DMXL2         | + | 129 | 139 | 2.11E-<br>05 | 0.0227 | GCGCCGGTGC<br>A |

|   |                 |               |   |     |     |              |        |                 |
|---|-----------------|---------------|---|-----|-----|--------------|--------|-----------------|
| 1 | GCGCVTGCG<br>CV | PSMA1         | - | 3   | 13  | 2.12E-<br>05 | 0.0227 | GCGCCCGCCC<br>G |
| 1 | GCGCVTGCG<br>CV | ERI3          | + | 57  | 67  | 2.12E-<br>05 | 0.0227 | GCGCCCGCCC<br>G |
| 1 | GCGCVTGCG<br>CV | BRD1          | + | 72  | 82  | 2.12E-<br>05 | 0.0227 | GCGCCCGCCC<br>G |
| 1 | GCGCVTGCG<br>CV | DRD4          | + | 94  | 104 | 2.12E-<br>05 | 0.0227 | GCGCCCGCCC<br>G |
| 1 | GCGCVTGCG<br>CV | KAZN          | + | 101 | 111 | 2.12E-<br>05 | 0.0227 | GCGCCCGCCC<br>G |
| 1 | GCGCVTGCG<br>CV | PKD1P6        | + | 113 | 123 | 2.12E-<br>05 | 0.0227 | GCGCCCGCCC<br>G |
| 1 | GCGCVTGCG<br>CV | XPOT          | + | 168 | 178 | 2.12E-<br>05 | 0.0227 | GCGCCCGCCC<br>G |
| 1 | GCGCVTGCG<br>CV | MIR1199       | - | 159 | 169 | 2.13E-<br>05 | 0.0228 | CCGCACGCGC<br>A |
| 1 | GCGCVTGCG<br>CV | MAGI1         | - | 18  | 28  | 2.15E-<br>05 | 0.023  | ACGCGCGCGC<br>A |
| 1 | GCGCVTGCG<br>CV | TEX30         | - | 104 | 114 | 2.15E-<br>05 | 0.023  | ACGCGCGCGC<br>A |
| 1 | GCGCVTGCG<br>CV | EP400         | + | 74  | 84  | 2.22E-<br>05 | 0.023  | GCGGACGCG<br>CG |
| 1 | GCGCVTGCG<br>CV | PEBP4         | - | 12  | 22  | 2.24E-<br>05 | 0.023  | GCGGCGGCG<br>CC |
| 1 | GCGCVTGCG<br>CV | RP11-521B24.3 | - | 28  | 38  | 2.24E-<br>05 | 0.023  | GCGGCGGCG<br>CC |
| 1 | GCGCVTGCG<br>CV | TRIO          | - | 110 | 120 | 2.24E-<br>05 | 0.023  | GCGGCGGCG<br>CC |
| 1 | GCGCVTGCG<br>CV | ANKRD11       | - | 151 | 161 | 2.24E-<br>05 | 0.023  | GCGGCGGCG<br>CC |
| 1 | GCGCVTGCG<br>CV | POFUT1        | - | 154 | 164 | 2.24E-<br>05 | 0.023  | GCGGCGGCG<br>CC |
| 1 | GCGCVTGCG<br>CV | AGO4          | - | 187 | 197 | 2.24E-<br>05 | 0.023  | GCGGCGGCG<br>CC |
| 1 | GCGCVTGCG<br>CV | PLEKHG2       | - | 191 | 201 | 2.24E-<br>05 | 0.023  | GCGGCGGCG<br>CC |
| 1 | GCGCVTGCG<br>CV | UBE2H         | + | 15  | 25  | 2.24E-<br>05 | 0.023  | GCGGCGGCG<br>CC |
| 1 | GCGCVTGCG<br>CV | SETD1B        | + | 44  | 54  | 2.24E-<br>05 | 0.023  | GCGGCGGCG<br>CC |
| 1 | GCGCVTGCG<br>CV | IRF2BP2       | + | 73  | 83  | 2.24E-<br>05 | 0.023  | GCGGCGGCG<br>CC |
| 1 | GCGCVTGCG<br>CV | FZD7          | + | 75  | 85  | 2.24E-<br>05 | 0.023  | GCGGCGGCG<br>CC |
| 1 | GCGCVTGCG<br>CV | FAM160B1      | + | 86  | 96  | 2.24E-<br>05 | 0.023  | GCGGCGGCG<br>CC |
| 1 | GCGCVTGCG<br>CV | RP4-734G22.3  | + | 88  | 98  | 2.24E-<br>05 | 0.023  | GCGGCGGCG<br>CC |
| 1 | GCGCVTGCG<br>CV | C6orf132      | + | 112 | 122 | 2.24E-<br>05 | 0.023  | GCGGCGGCG<br>CC |
| 1 | GCGCVTGCG<br>CV | SLX4          | + | 125 | 135 | 2.24E-<br>05 | 0.023  | GCGGCGGCG<br>CC |
| 1 | GCGCVTGCG<br>CV | CDC42BPB      | + | 146 | 156 | 2.24E-<br>05 | 0.023  | GCGGCGGCG<br>CC |

|   |                 |              |   |     |     |          |        |                 |
|---|-----------------|--------------|---|-----|-----|----------|--------|-----------------|
| 1 | GCGCVTGCG<br>CV | LEPROTL1     | - | 65  | 75  | 2.25E-05 | 0.023  | GCGGGGGCG<br>CG |
| 1 | GCGCVTGCG<br>CV | KIF1B        | - | 111 | 121 | 2.25E-05 | 0.023  | GCGGGGGCG<br>CG |
| 1 | GCGCVTGCG<br>CV | TCF20        | - | 135 | 145 | 2.25E-05 | 0.023  | GCGGGGGCG<br>CG |
| 1 | GCGCVTGCG<br>CV | PACS1        | - | 139 | 149 | 2.25E-05 | 0.023  | GCGGGGGCG<br>CG |
| 1 | GCGCVTGCG<br>CV | SCMH1        | - | 175 | 185 | 2.25E-05 | 0.023  | GCGGGGGCG<br>CG |
| 1 | GCGCVTGCG<br>CV | COBL         | + | 24  | 34  | 2.25E-05 | 0.023  | GCGGGGGCG<br>CG |
| 1 | GCGCVTGCG<br>CV | SLX4         | + | 70  | 80  | 2.25E-05 | 0.023  | GCGGGGGCG<br>CG |
| 1 | GCGCVTGCG<br>CV | UXS1         | + | 79  | 89  | 2.25E-05 | 0.023  | GCGGGGGCG<br>CG |
| 1 | GCGCVTGCG<br>CV | RP1-66C13.4  | + | 81  | 91  | 2.25E-05 | 0.023  | GCGGGGGCG<br>CG |
| 1 | GCGCVTGCG<br>CV | RAB28        | + | 82  | 92  | 2.25E-05 | 0.023  | GCGGGGGCG<br>CG |
| 1 | GCGCVTGCG<br>CV | CYTH1        | + | 108 | 118 | 2.25E-05 | 0.023  | GCGGGGGCG<br>CG |
| 1 | GCGCVTGCG<br>CV | NSF          | + | 131 | 141 | 2.25E-05 | 0.023  | GCGGGGGCG<br>CG |
| 1 | GCGCVTGCG<br>CV | TMEM98       | + | 166 | 176 | 2.25E-05 | 0.023  | GCGGGGGCG<br>CG |
| 1 | GCGCVTGCG<br>CV | SLC6A7       | + | 173 | 183 | 2.25E-05 | 0.023  | GCGGGGGCG<br>CG |
| 1 | GCGCVTGCG<br>CV | SNRPD3       | - | 41  | 51  | 2.35E-05 | 0.0235 | GCGGCTGCC<br>G  |
| 1 | GCGCVTGCG<br>CV | RP4-591C20.9 | - | 45  | 55  | 2.35E-05 | 0.0235 | GCGCAGGCC<br>G  |
| 1 | GCGCVTGCG<br>CV | MPRIIP1      | - | 68  | 78  | 2.35E-05 | 0.0235 | GCGCAGGCC<br>G  |
| 1 | GCGCVTGCG<br>CV | GPR180       | - | 71  | 81  | 2.35E-05 | 0.0235 | GCGGCTGCC<br>G  |
| 1 | GCGCVTGCG<br>CV | IGFBP4       | - | 85  | 95  | 2.35E-05 | 0.0235 | GCGGCTGCC<br>G  |
| 1 | GCGCVTGCG<br>CV | TP53TG1      | - | 98  | 108 | 2.35E-05 | 0.0235 | GCGCAGGCC<br>G  |
| 1 | GCGCVTGCG<br>CV | DNAJB3       | - | 125 | 135 | 2.35E-05 | 0.0235 | GCGCAGGCC<br>G  |
| 1 | GCGCVTGCG<br>CV | EEF1G        | + | 17  | 27  | 2.35E-05 | 0.0235 | GCGCAGGCC<br>G  |
| 1 | GCGCVTGCG<br>CV | IRS1         | + | 41  | 51  | 2.35E-05 | 0.0235 | GCGGCTGCC<br>G  |
| 1 | GCGCVTGCG<br>CV | CHMP3        | + | 62  | 72  | 2.35E-05 | 0.0235 | GCGGCTGCC<br>G  |
| 1 | GCGCVTGCG<br>CV | TMEM141      | + | 86  | 96  | 2.35E-05 | 0.0235 | GCGCAGGCC<br>G  |
| 1 | GCGCVTGCG<br>CV | MIR1281      | + | 88  | 98  | 2.35E-05 | 0.0235 | GCGCAGGCC<br>G  |
| 1 | GCGCVTGCG<br>CV | ZBTB4        | + | 89  | 99  | 2.35E-05 | 0.0235 | GCGCAGGCC<br>G  |

|   |                 |          |   |     |     |              |        |                 |
|---|-----------------|----------|---|-----|-----|--------------|--------|-----------------|
| 1 | GCGCVTGCG<br>CV | USP2     | + | 100 | 110 | 2.35E-<br>05 | 0.0235 | GCGGCTGCC<br>G  |
| 1 | GCGCVTGCG<br>CV | CDC42BPG | + | 150 | 160 | 2.35E-<br>05 | 0.0235 | GCGGCTGCC<br>G  |
| 1 | GCGCVTGCG<br>CV | CAMSAP3  | - | 130 | 140 | 2.38E-<br>05 | 0.0237 | GCGCTCGCG<br>C  |
| 1 | GCGCVTGCG<br>CV | NDUFA8   | + | 119 | 129 | 2.38E-<br>05 | 0.0237 | CCGGATGCG<br>A  |
| 1 | GCGCVTGCG<br>CV | METTL5   | - | 110 | 120 | 2.41E-<br>05 | 0.0239 | CCGCACGCG<br>G  |
| 1 | GCGCVTGCG<br>CV | PSMA7    | - | 138 | 148 | 2.41E-<br>05 | 0.0239 | ACGCCCGCG<br>C  |
| 1 | GCGCVTGCG<br>CV | ATXN10   | + | 12  | 22  | 2.44E-<br>05 | 0.0239 | CCGCCGGCG<br>C  |
| 1 | GCGCVTGCG<br>CV | PANK1    | + | 20  | 30  | 2.44E-<br>05 | 0.0239 | ACGCGCGCG<br>G  |
| 1 | GCGCVTGCG<br>CV | PANK1    | - | 23  | 33  | 2.44E-<br>05 | 0.0239 | ACGCGCGCG<br>G  |
| 1 | GCGCVTGCG<br>CV | LRP4     | - | 27  | 37  | 2.44E-<br>05 | 0.0239 | CCGCCGGCG<br>C  |
| 1 | GCGCVTGCG<br>CV | GLG1     | - | 40  | 50  | 2.44E-<br>05 | 0.0239 | CCGCCGGCG<br>C  |
| 1 | GCGCVTGCG<br>CV | IQSEC3   | - | 84  | 94  | 2.44E-<br>05 | 0.0239 | CCGCCGGCG<br>C  |
| 1 | GCGCVTGCG<br>CV | NCOR2    | + | 147 | 157 | 2.44E-<br>05 | 0.0239 | CCGCCGGCG<br>C  |
| 1 | GCGCVTGCG<br>CV | MIF4GD   | + | 159 | 169 | 2.44E-<br>05 | 0.0239 | ACGCGCGCG<br>G  |
| 1 | GCGCVTGCG<br>CV | STRN     | - | 158 | 168 | 2.44E-<br>05 | 0.0239 | CCGCCGGCG<br>C  |
| 1 | GCGCVTGCG<br>CV | KMT2B    | - | 176 | 186 | 2.44E-<br>05 | 0.0239 | CCGCCGGCG<br>C  |
| 1 | GCGCVTGCG<br>CV | SLC39A9  | + | 3   | 13  | 2.47E-<br>05 | 0.0239 | GCGGGCGCG<br>CA |
| 1 | GCGCVTGCG<br>CV | TBC1D2B  | - | 43  | 53  | 2.47E-<br>05 | 0.0239 | GCGGGCGCG<br>CA |
| 1 | GCGCVTGCG<br>CV | TBC1D2B  | - | 45  | 55  | 2.47E-<br>05 | 0.0239 | CCGCGGGCG<br>G  |
| 1 | GCGCVTGCG<br>CV | RRM2     | - | 78  | 88  | 2.47E-<br>05 | 0.0239 | CCGCGGGCG<br>G  |
| 1 | GCGCVTGCG<br>CV | CASZ1    | - | 104 | 114 | 2.47E-<br>05 | 0.0239 | GCGGGCGCG<br>CA |
| 1 | GCGCVTGCG<br>CV | CASZ1    | - | 106 | 116 | 2.47E-<br>05 | 0.0239 | CCGCGGGCG<br>G  |
| 1 | GCGCVTGCG<br>CV | PDXDC2P  | + | 164 | 174 | 2.47E-<br>05 | 0.0239 | CCGCGGGCG<br>G  |
| 1 | GCGCVTGCG<br>CV | ITGB4    | - | 190 | 200 | 2.47E-<br>05 | 0.0239 | GCGGGCGCG<br>CA |
| 1 | GCGCVTGCG<br>CV | CYCS     | + | 31  | 41  | 2.51E-<br>05 | 0.0243 | CAGCATGCG<br>G  |
| 1 | GCGCVTGCG<br>CV | POM121C  | + | 20  | 30  | 2.54E-<br>05 | 0.0246 | GCGCTTGTC<br>A  |
| 1 | GCGCVTGCG<br>CV | HCRTR1   | + | 88  | 98  | 2.59E-<br>05 | 0.025  | GAGCCCGCG<br>C  |

|   |                 |            |   |     |     |              |        |                 |
|---|-----------------|------------|---|-----|-----|--------------|--------|-----------------|
| 1 | GCGCVTGCG<br>CV | DAD1       | + | 123 | 133 | 2.59E-<br>05 | 0.025  | GAGGGTGCG<br>CA |
| 1 | GCGCVTGCG<br>CV | FOXJ2      | + | 136 | 146 | 2.59E-<br>05 | 0.025  | GAGCCCGCGC<br>C |
| 1 | GCGCVTGCG<br>CV | PRR12      | + | 45  | 55  | 2.60E-<br>05 | 0.025  | GAGCGCGCG<br>CG |
| 1 | GCGCVTGCG<br>CV | C17orf58   | - | 65  | 75  | 2.60E-<br>05 | 0.025  | GAGCGCGCG<br>CG |
| 1 | GCGCVTGCG<br>CV | PPP5D1     | - | 85  | 95  | 2.60E-<br>05 | 0.025  | GAGCGCGCG<br>CG |
| 1 | GCGCVTGCG<br>CV | SSTR2      | - | 124 | 134 | 2.60E-<br>05 | 0.025  | GAGCGCGCG<br>CG |
| 1 | GCGCVTGCG<br>CV | PLEKHN1    | + | 61  | 71  | 2.64E-<br>05 | 0.025  | CCGCCTGCC<br>G  |
| 1 | GCGCVTGCG<br>CV | PSMC4      | + | 66  | 76  | 2.64E-<br>05 | 0.025  | GCGCACGCC<br>A  |
| 1 | GCGCVTGCG<br>CV | AGAP1      | - | 85  | 95  | 2.64E-<br>05 | 0.025  | CCGCCTGCC<br>G  |
| 1 | GCGCVTGCG<br>CV | PACS1      | - | 114 | 124 | 2.64E-<br>05 | 0.025  | CCGCCTGCC<br>G  |
| 1 | GCGCVTGCG<br>CV | RP9P       | - | 117 | 127 | 2.64E-<br>05 | 0.025  | CCGCCTGCC<br>G  |
| 1 | GCGCVTGCG<br>CV | SYNPO      | - | 122 | 132 | 2.64E-<br>05 | 0.025  | CCGCCTGCC<br>G  |
| 1 | GCGCVTGCG<br>CV | MAOB       | - | 152 | 162 | 2.64E-<br>05 | 0.025  | CCGCCTGCC<br>G  |
| 1 | GCGCVTGCG<br>CV | SYPL1      | + | 53  | 63  | 2.65E-<br>05 | 0.0251 | GCGCGGGCCC<br>A |
| 1 | GCGCVTGCG<br>CV | SH3D21     | + | 72  | 82  | 2.65E-<br>05 | 0.0251 | GCGCGGGCCC<br>A |
| 1 | GCGCVTGCG<br>CV | AC096772.6 | + | 160 | 170 | 2.69E-<br>05 | 0.0252 | GAGCTGTGC<br>A  |
| 1 | GCGCVTGCG<br>CV | TRIM8      | - | 32  | 42  | 2.73E-<br>05 | 0.0252 | CCGCGCGCGC<br>A |
| 1 | GCGCVTGCG<br>CV | MRPL15     | - | 60  | 70  | 2.73E-<br>05 | 0.0252 | CCGCGCGCGC<br>A |
| 1 | GCGCVTGCG<br>CV | BRD4       | + | 79  | 89  | 2.73E-<br>05 | 0.0252 | CCGCGCGCGC<br>A |
| 1 | GCGCVTGCG<br>CV | HNRNPA1    | + | 85  | 95  | 2.73E-<br>05 | 0.0252 | ACGCAGGCG<br>CC |
| 1 | GCGCVTGCG<br>CV | CETN2      | - | 87  | 97  | 2.73E-<br>05 | 0.0252 | CCGCGCGCGC<br>A |
| 1 | GCGCVTGCG<br>CV | CREG1      | + | 149 | 159 | 2.73E-<br>05 | 0.0252 | CCGCGCGCGC<br>A |
| 1 | GCGCVTGCG<br>CV | PSMB1      | - | 186 | 196 | 2.73E-<br>05 | 0.0252 | ACGGCTGCGC<br>C |
| 1 | GCGCVTGCG<br>CV | MINK1      | + | 12  | 22  | 2.76E-<br>05 | 0.0252 | GCCCCGGCGC<br>G |
| 1 | GCGCVTGCG<br>CV | RAP1GDS1   | + | 14  | 24  | 2.76E-<br>05 | 0.0252 | GCGGCCGCGC<br>C |
| 1 | GCGCVTGCG<br>CV | PSMA7      | + | 35  | 45  | 2.76E-<br>05 | 0.0252 | GCCCCGGCGC<br>G |
| 1 | GCGCVTGCG<br>CV | TMEM242    | + | 46  | 56  | 2.76E-<br>05 | 0.0252 | GCCCCGGCGC<br>G |

|   |                 |             |   |     |     |              |        |                 |
|---|-----------------|-------------|---|-----|-----|--------------|--------|-----------------|
| 1 | GCGCVTGCG<br>CV | CSNK2A2     | - | 40  | 50  | 2.76E-<br>05 | 0.0252 | GCGGCCGCGC<br>C |
| 1 | GCGCVTGCG<br>CV | NRARP       | + | 59  | 69  | 2.76E-<br>05 | 0.0252 | GCCCCGGCGC<br>G |
| 1 | GCGCVTGCG<br>CV | LINC00998   | - | 84  | 94  | 2.76E-<br>05 | 0.0252 | GCCCCGGCGC<br>G |
| 1 | GCGCVTGCG<br>CV | AGO2        | + | 99  | 109 | 2.76E-<br>05 | 0.0252 | GCGGCCGCGC<br>C |
| 1 | GCGCVTGCG<br>CV | CDC42BPB    | - | 90  | 100 | 2.76E-<br>05 | 0.0252 | GCGGCCGCGC<br>C |
| 1 | GCGCVTGCG<br>CV | ATP11A      | - | 98  | 108 | 2.76E-<br>05 | 0.0252 | GCGGCCGCGC<br>C |
| 1 | GCGCVTGCG<br>CV | TRIO        | - | 98  | 108 | 2.76E-<br>05 | 0.0252 | GCGGCCGCGC<br>C |
| 1 | GCGCVTGCG<br>CV | UQCR11      | + | 113 | 123 | 2.76E-<br>05 | 0.0252 | GCGGCCGCGC<br>C |
| 1 | GCGCVTGCG<br>CV | AGO2        | - | 104 | 114 | 2.76E-<br>05 | 0.0252 | GCCCCGGCGC<br>G |
| 1 | GCGCVTGCG<br>CV | RP11-47A8.5 | + | 147 | 157 | 2.76E-<br>05 | 0.0252 | GCGGCCGCGC<br>C |
| 1 | GCGCVTGCG<br>CV | MLLT4       | - | 167 | 177 | 2.76E-<br>05 | 0.0252 | GCGGCCGCGC<br>C |
| 1 | GCGCVTGCG<br>CV | FZD7        | - | 174 | 184 | 2.76E-<br>05 | 0.0252 | GCGGCCGCGC<br>C |
| 1 | GCGCVTGCG<br>CV | AGAP1       | + | 187 | 197 | 2.76E-<br>05 | 0.0252 | GCCCCGGCGC<br>G |
| 1 | GCGCVTGCG<br>CV | SCAF1       | - | 184 | 194 | 2.76E-<br>05 | 0.0252 | GCCCCGGCGC<br>G |
| 1 | GCGCVTGCG<br>CV | PXN         | + | 10  | 20  | 2.81E-<br>05 | 0.0252 | CAGCGTGCGC<br>A |
| 1 | GCGCVTGCG<br>CV | ZDHHC14     | - | 25  | 35  | 2.81E-<br>05 | 0.0252 | GCACCGGCGC<br>A |
| 1 | GCGCVTGCG<br>CV | SLX4        | - | 32  | 42  | 2.81E-<br>05 | 0.0252 | GCGGGCGCG<br>CG |
| 1 | GCGCVTGCG<br>CV | C6orf48     | - | 49  | 59  | 2.81E-<br>05 | 0.0252 | GCGGGCGCG<br>CG |
| 1 | GCGCVTGCG<br>CV | AGO4        | + | 63  | 73  | 2.81E-<br>05 | 0.0252 | GCGGGCGCG<br>CG |
| 1 | GCGCVTGCG<br>CV | AC132812.1  | - | 55  | 65  | 2.81E-<br>05 | 0.0252 | GCGGGCGCG<br>CG |
| 1 | GCGCVTGCG<br>CV | EPPK1       | + | 85  | 95  | 2.81E-<br>05 | 0.0252 | GCGGGCGCG<br>CG |
| 1 | GCGCVTGCG<br>CV | NRBP2       | - | 83  | 93  | 2.81E-<br>05 | 0.0252 | GCGGGCGCG<br>CG |
| 1 | GCGCVTGCG<br>CV | TMEM106C    | - | 83  | 93  | 2.81E-<br>05 | 0.0252 | GCGGGCGCG<br>CG |
| 1 | GCGCVTGCG<br>CV | SYNJ2       | + | 93  | 103 | 2.81E-<br>05 | 0.0252 | GCGGGCGCG<br>CG |
| 1 | GCGCVTGCG<br>CV | PXN         | + | 114 | 124 | 2.81E-<br>05 | 0.0252 | GCGGGCGCG<br>CG |
| 1 | GCGCVTGCG<br>CV | WDR88       | + | 115 | 125 | 2.81E-<br>05 | 0.0252 | GCGGGCGCG<br>CG |
| 1 | GCGCVTGCG<br>CV | KMT2C       | - | 107 | 117 | 2.81E-<br>05 | 0.0252 | GCGGGCGCG<br>CG |



|   |                 |                   |   |     |     |              |        |                 |
|---|-----------------|-------------------|---|-----|-----|--------------|--------|-----------------|
| 1 | GCGCVTGCG<br>CV | DMXL2             | - | 128 | 138 | 2.81E-<br>05 | 0.0252 | GCACCGGCGC<br>A |
| 1 | GCGCVTGCG<br>CV | PHLPP1            | + | 139 | 149 | 2.81E-<br>05 | 0.0252 | GCGGGCGCG<br>CG |
| 1 | GCGCVTGCG<br>CV | RAPGEF1           | + | 140 | 150 | 2.81E-<br>05 | 0.0252 | GCGGGCGCG<br>CG |
| 1 | GCGCVTGCG<br>CV | FAM63B            | - | 146 | 156 | 2.81E-<br>05 | 0.0252 | GCGGGCGCG<br>CG |
| 1 | GCGCVTGCG<br>CV | MIR611            | - | 14  | 24  | 2.84E-<br>05 | 0.0253 | GAGCAGGCG<br>CC |
| 1 | GCGCVTGCG<br>CV | CRIM1             | + | 49  | 59  | 2.84E-<br>05 | 0.0253 | GAGGCTGCGC<br>C |
| 1 | GCGCVTGCG<br>CV | MAPK8IP3          | - | 108 | 118 | 2.84E-<br>05 | 0.0253 | GAGGCTGCGC<br>C |
| 1 | GCGCVTGCG<br>CV | RNF139            | - | 108 | 118 | 2.84E-<br>05 | 0.0253 | GAGGCTGCGC<br>C |
| 1 | GCGCVTGCG<br>CV | SP5               | + | 154 | 164 | 2.84E-<br>05 | 0.0253 | GAGCAGGCG<br>CC |
| 1 | GCGCVTGCG<br>CV | FAM84A            | + | 163 | 173 | 2.84E-<br>05 | 0.0253 | GAGCAGGCG<br>CC |
| 1 | GCGCVTGCG<br>CV | NRBP2             | + | 186 | 196 | 2.84E-<br>05 | 0.0253 | GAGGCTGCGC<br>C |
| 1 | GCGCVTGCG<br>CV | N6AMT2            | - | 37  | 47  | 2.98E-<br>05 | 0.0253 | GCCCTTGCGC<br>A |
| 1 | GCGCVTGCG<br>CV | XPOT              | + | 52  | 62  | 2.98E-<br>05 | 0.0253 | GCGTGTGCGC<br>C |
| 1 | GCGCVTGCG<br>CV | CTD-<br>2154B17.4 | - | 58  | 68  | 2.98E-<br>05 | 0.0253 | GCGCACGCC<br>G  |
| 1 | GCGCVTGCG<br>CV | DAZAP1            | - | 79  | 89  | 2.98E-<br>05 | 0.0253 | GCGCACGCC<br>G  |
| 1 | GCGCVTGCG<br>CV | EIF4EBP1          | + | 95  | 105 | 2.98E-<br>05 | 0.0253 | GCGCCCGTGC<br>G |
| 1 | GCGCVTGCG<br>CV | RPL5              | - | 99  | 109 | 2.98E-<br>05 | 0.0253 | GCCCTTGCGC<br>A |
| 1 | GCGCVTGCG<br>CV | MAP4              | + | 121 | 131 | 2.98E-<br>05 | 0.0253 | GCGTGTGCGC<br>C |
| 1 | GCGCVTGCG<br>CV | C6orf99           | - | 23  | 33  | 3.00E-<br>05 | 0.0253 | GCGCCGGCCC<br>C |
| 1 | GCGCVTGCG<br>CV | BRD1              | + | 60  | 70  | 3.00E-<br>05 | 0.0253 | GCGCCGGCCC<br>C |
| 1 | GCGCVTGCG<br>CV | PTGES3            | - | 71  | 81  | 3.00E-<br>05 | 0.0253 | GCGCCGGCCC<br>C |
| 1 | GCGCVTGCG<br>CV | PHLPP1            | - | 71  | 81  | 3.00E-<br>05 | 0.0253 | GCGCCGGCCC<br>C |
| 1 | GCGCVTGCG<br>CV | TEX22             | + | 85  | 95  | 3.00E-<br>05 | 0.0253 | GCGCCGGCCC<br>C |
| 1 | GCGCVTGCG<br>CV | HIST1H3J          | - | 90  | 100 | 3.00E-<br>05 | 0.0253 | GCGCCGGCCC<br>C |
| 1 | GCGCVTGCG<br>CV | RAI14             | - | 114 | 124 | 3.00E-<br>05 | 0.0253 | GCGCCGGCCC<br>C |
| 1 | GCGCVTGCG<br>CV | IRS1              | - | 118 | 128 | 3.00E-<br>05 | 0.0253 | GCGCCGGCCC<br>C |
| 1 | GCGCVTGCG<br>CV | VRK1              | - | 159 | 169 | 3.00E-<br>05 | 0.0253 | GCGCCGGCCC<br>C |

|   |                 |             |   |     |     |              |        |                  |
|---|-----------------|-------------|---|-----|-----|--------------|--------|------------------|
| 1 | GCGCVTGCG<br>CV | DIP2A       | + | 26  | 36  | 3.01E-<br>05 | 0.0253 | GCGCGGGCCC<br>G  |
| 1 | GCGCVTGCG<br>CV | GSE1        | - | 81  | 91  | 3.01E-<br>05 | 0.0253 | GCGCGGGCCC<br>G  |
| 1 | GCGCVTGCG<br>CV | CDKN1C      | - | 144 | 154 | 3.01E-<br>05 | 0.0253 | GCGCGGGCCC<br>G  |
| 1 | GCGCVTGCG<br>CV | C8orf33     | + | 13  | 23  | 3.06E-<br>05 | 0.0253 | CCGCCCCGCGC<br>C |
| 1 | GCGCVTGCG<br>CV | CLPTM1L     | - | 4   | 14  | 3.06E-<br>05 | 0.0253 | CCGCCCCGCGC<br>C |
| 1 | GCGCVTGCG<br>CV | MTA1        | + | 19  | 29  | 3.06E-<br>05 | 0.0253 | CCGCCCCGCGC<br>C |
| 1 | GCGCVTGCG<br>CV | C8orf33     | + | 24  | 34  | 3.06E-<br>05 | 0.0253 | CCGCCCCGCGC<br>C |
| 1 | GCGCVTGCG<br>CV | NDUFB2-AS1  | + | 25  | 35  | 3.06E-<br>05 | 0.0253 | CCGCCCCGCGC<br>C |
| 1 | GCGCVTGCG<br>CV | NOL4L       | + | 29  | 39  | 3.06E-<br>05 | 0.0253 | CCGCCCCGCGC<br>C |
| 1 | GCGCVTGCG<br>CV | C8orf33     | + | 35  | 45  | 3.06E-<br>05 | 0.0253 | CCGCCCCGCGC<br>C |
| 1 | GCGCVTGCG<br>CV | C8orf33     | + | 46  | 56  | 3.06E-<br>05 | 0.0253 | CCGCCCCGCGC<br>C |
| 1 | GCGCVTGCG<br>CV | RP1-102K2.8 | + | 48  | 58  | 3.06E-<br>05 | 0.0253 | CCGCCCCGCGC<br>C |
| 1 | GCGCVTGCG<br>CV | MEX3D       | - | 40  | 50  | 3.06E-<br>05 | 0.0253 | CCGCCCCGCGC<br>C |
| 1 | GCGCVTGCG<br>CV | CYTH1       | - | 42  | 52  | 3.06E-<br>05 | 0.0253 | CCGCCCCGCGC<br>C |
| 1 | GCGCVTGCG<br>CV | RP11-40E6.1 | + | 54  | 64  | 3.06E-<br>05 | 0.0253 | CCGCCCCGCGC<br>C |
| 1 | GCGCVTGCG<br>CV | CDKN1C      | - | 45  | 55  | 3.06E-<br>05 | 0.0253 | GCCCCCGCGC<br>A  |
| 1 | GCGCVTGCG<br>CV | C8orf33     | + | 57  | 67  | 3.06E-<br>05 | 0.0253 | CCGCCCCGCGC<br>C |
| 1 | GCGCVTGCG<br>CV | MLLT4       | - | 50  | 60  | 3.06E-<br>05 | 0.0253 | CCGCCCCGCGC<br>C |
| 1 | GCGCVTGCG<br>CV | HSPA9       | - | 57  | 67  | 3.06E-<br>05 | 0.0253 | CCGCCCCGCGC<br>C |
| 1 | GCGCVTGCG<br>CV | C8orf33     | + | 68  | 78  | 3.06E-<br>05 | 0.0253 | CCGCCCCGCGC<br>C |
| 1 | GCGCVTGCG<br>CV | MEX3D       | - | 58  | 68  | 3.06E-<br>05 | 0.0253 | CCGCCCCGCGC<br>C |
| 1 | GCGCVTGCG<br>CV | SLC7A5      | - | 63  | 73  | 3.06E-<br>05 | 0.0253 | CCGCCCCGCGC<br>C |
| 1 | GCGCVTGCG<br>CV | C8orf33     | + | 79  | 89  | 3.06E-<br>05 | 0.0253 | CCGCCCCGCGC<br>C |
| 1 | GCGCVTGCG<br>CV | DIAPH2      | - | 75  | 85  | 3.06E-<br>05 | 0.0253 | GAGCATGCC<br>G   |
| 1 | GCGCVTGCG<br>CV | TCF3        | - | 75  | 85  | 3.06E-<br>05 | 0.0253 | CCGCCCCGCGC<br>C |
| 1 | GCGCVTGCG<br>CV | SLX4        | - | 75  | 85  | 3.06E-<br>05 | 0.0253 | CCGCCCCGCGC<br>C |
| 1 | GCGCVTGCG<br>CV | C8orf33     | + | 90  | 100 | 3.06E-<br>05 | 0.0253 | CCGCCCCGCGC<br>C |

|   |                 |             |   |     |     |              |        |                 |
|---|-----------------|-------------|---|-----|-----|--------------|--------|-----------------|
| 1 | GCGCVTGCG<br>CV | C8orf33     | + | 101 | 111 | 3.06E-<br>05 | 0.0253 | CCGCCCGCGC<br>C |
| 1 | GCGCVTGCG<br>CV | C8orf33     | + | 112 | 122 | 3.06E-<br>05 | 0.0253 | CCGCCCGCGC<br>C |
| 1 | GCGCVTGCG<br>CV | SH3BP2      | - | 102 | 112 | 3.06E-<br>05 | 0.0253 | CCGCCCGCGC<br>C |
| 1 | GCGCVTGCG<br>CV | THNSL1      | - | 103 | 113 | 3.06E-<br>05 | 0.0253 | GCCCCCGCGC<br>A |
| 1 | GCGCVTGCG<br>CV | AC011747.4  | - | 120 | 130 | 3.06E-<br>05 | 0.0253 | CCGCCCGCGC<br>C |
| 1 | GCGCVTGCG<br>CV | DOCK5       | - | 125 | 135 | 3.06E-<br>05 | 0.0253 | CCGCCCGCGC<br>C |
| 1 | GCGCVTGCG<br>CV | PSMA4       | - | 128 | 138 | 3.06E-<br>05 | 0.0253 | GCCCCCGCGC<br>A |
| 1 | GCGCVTGCG<br>CV | ARHGAP32    | - | 152 | 162 | 3.06E-<br>05 | 0.0253 | CCGCCCGCGC<br>C |
| 1 | GCGCVTGCG<br>CV | NCOA6       | - | 154 | 164 | 3.06E-<br>05 | 0.0253 | CCGCCCGCGC<br>C |
| 1 | GCGCVTGCG<br>CV | CROT        | - | 164 | 174 | 3.06E-<br>05 | 0.0253 | CCGCCCGCGC<br>C |
| 1 | GCGCVTGCG<br>CV | DOT1L       | + | 23  | 33  | 3.07E-<br>05 | 0.0253 | CCGCGCGCGC<br>G |
| 1 | GCGCVTGCG<br>CV | DOT1L       | - | 24  | 34  | 3.07E-<br>05 | 0.0253 | CCGCGCGCGC<br>G |
| 1 | GCGCVTGCG<br>CV | NSF         | + | 38  | 48  | 3.07E-<br>05 | 0.0253 | CCGCGCGCGC<br>G |
| 1 | GCGCVTGCG<br>CV | REL         | - | 30  | 40  | 3.07E-<br>05 | 0.0253 | CCGCGCGCGC<br>G |
| 1 | GCGCVTGCG<br>CV | C6orf48     | + | 56  | 66  | 3.07E-<br>05 | 0.0253 | CCGCGCGCGC<br>G |
| 1 | GCGCVTGCG<br>CV | AL353644.10 | + | 68  | 78  | 3.07E-<br>05 | 0.0253 | CCGCGCGCGC<br>G |
| 1 | GCGCVTGCG<br>CV | C6orf48     | - | 59  | 69  | 3.07E-<br>05 | 0.0253 | CCGCGCGCGC<br>G |
| 1 | GCGCVTGCG<br>CV | AL353644.10 | - | 69  | 79  | 3.07E-<br>05 | 0.0253 | CCGCGCGCGC<br>G |
| 1 | GCGCVTGCG<br>CV | KDEL2       | + | 133 | 143 | 3.07E-<br>05 | 0.0253 | CCGCGCGCGC<br>G |
| 1 | GCGCVTGCG<br>CV | ZDHHC14     | + | 140 | 150 | 3.07E-<br>05 | 0.0253 | CCGCGCGCGC<br>G |
| 1 | GCGCVTGCG<br>CV | NSF         | - | 138 | 148 | 3.07E-<br>05 | 0.0253 | CCGCGCGCGC<br>G |
| 1 | GCGCVTGCG<br>CV | MBD6        | - | 149 | 159 | 3.07E-<br>05 | 0.0253 | CCGCGCGCGC<br>G |
| 1 | GCGCVTGCG<br>CV | AGO2        | - | 166 | 176 | 3.07E-<br>05 | 0.0253 | CCGCGCGCGC<br>G |
| 1 | GCGCVTGCG<br>CV | ZFAS1       | - | 47  | 57  | 3.08E-<br>05 | 0.0253 | GCGGAGGCG<br>CC |
| 1 | GCGCVTGCG<br>CV | PPP1R7      | - | 75  | 85  | 3.08E-<br>05 | 0.0253 | GCGGAGGCG<br>CC |
| 1 | GCGCVTGCG<br>CV | NUDT15      | - | 182 | 192 | 3.08E-<br>05 | 0.0253 | GCGGAGGCG<br>CC |
| 1 | GCGCVTGCG<br>CV | PCBP2       | + | 35  | 45  | 3.12E-<br>05 | 0.0255 | CAGCCTGCGC<br>C |

|   |                 |              |   |     |     |              |        |                 |
|---|-----------------|--------------|---|-----|-----|--------------|--------|-----------------|
| 1 | GCGCVTGCG<br>CV | GCH1         | - | 76  | 86  | 3.12E-<br>05 | 0.0255 | CAGCCTGCGC<br>C |
| 1 | GCGCVTGCG<br>CV | AGAP1        | + | 132 | 142 | 3.12E-<br>05 | 0.0255 | GCGCCTGCGA<br>C |
| 1 | GCGCVTGCG<br>CV | C8orf33      | - | 137 | 147 | 3.12E-<br>05 | 0.0255 | GCGCCTGCGA<br>C |
| 1 | GCGCVTGCG<br>CV | PARK7        | + | 6   | 16  | 3.15E-<br>05 | 0.0256 | GCACCGGCGC<br>G |
| 1 | GCGCVTGCG<br>CV | BRD4         | + | 88  | 98  | 3.15E-<br>05 | 0.0256 | CAGCGTGCGC<br>G |
| 1 | GCGCVTGCG<br>CV | TDRD12       | + | 120 | 130 | 3.15E-<br>05 | 0.0256 | CAGCGTGCGC<br>G |
| 1 | GCGCVTGCG<br>CV | HIVEP2       | + | 141 | 151 | 3.15E-<br>05 | 0.0256 | GCACCGGCGC<br>G |
| 1 | GCGCVTGCG<br>CV | NDUFV2       | - | 138 | 148 | 3.15E-<br>05 | 0.0256 | CAGCGTGCGC<br>G |
| 1 | GCGCVTGCG<br>CV | VMAC         | + | 190 | 200 | 3.15E-<br>05 | 0.0256 | GCACCGGCGC<br>G |
| 1 | GCGCVTGCG<br>CV | RP11-350G8.5 | - | 61  | 71  | 3.18E-<br>05 | 0.0258 | CCGCATGCC<br>A  |
| 1 | GCGCVTGCG<br>CV | ATP5E        | + | 12  | 22  | 3.23E-<br>05 | 0.0261 | GCGCGCGCCC<br>A |
| 1 | GCGCVTGCG<br>CV | SYT2         | + | 21  | 31  | 3.23E-<br>05 | 0.0261 | GCGCGCGCCC<br>A |
| 1 | GCGCVTGCG<br>CV | DMXL2        | - | 25  | 35  | 3.23E-<br>05 | 0.0261 | GCGCGCGCCC<br>A |
| 1 | GCGCVTGCG<br>CV | PSMA1        | + | 40  | 50  | 3.23E-<br>05 | 0.0261 | GCGCGCGCCC<br>A |
| 1 | GCGCVTGCG<br>CV | RPL32        | + | 125 | 135 | 3.25E-<br>05 | 0.0262 | GCCCTTGCGC<br>G |
| 1 | GCGCVTGCG<br>CV | ARL3         | + | 69  | 79  | 3.29E-<br>05 | 0.0265 | GCACTTGCGC<br>A |
| 1 | GCGCVTGCG<br>CV | NDUFA7       | + | 7   | 17  | 3.36E-<br>05 | 0.0267 | CCGGTGCGC<br>C  |
| 1 | GCGCVTGCG<br>CV | SERPINI1     | + | 43  | 53  | 3.36E-<br>05 | 0.0267 | CCGCAGGCGC<br>C |
| 1 | GCGCVTGCG<br>CV | KIAA1671     | - | 150 | 160 | 3.36E-<br>05 | 0.0267 | GCCGCTGCGC<br>A |
| 1 | GCGCVTGCG<br>CV | CDK13        | - | 169 | 179 | 3.36E-<br>05 | 0.0267 | CCGCAGGCGC<br>C |
| 1 | GCGCVTGCG<br>CV | IQSEC3       | + | 181 | 191 | 3.36E-<br>05 | 0.0267 | GCCCAGGCGC<br>A |
| 1 | GCGCVTGCG<br>CV | NDUFV2       | + | 45  | 55  | 3.38E-<br>05 | 0.0267 | GCCCCGCGC<br>G  |
| 1 | GCGCVTGCG<br>CV | TRAK1        | + | 46  | 56  | 3.38E-<br>05 | 0.0267 | GCCCCGCGC<br>G  |
| 1 | GCGCVTGCG<br>CV | LEPROTL1     | + | 68  | 78  | 3.38E-<br>05 | 0.0267 | GCCCCGCGC<br>G  |
| 1 | GCGCVTGCG<br>CV | UXS1         | - | 70  | 80  | 3.38E-<br>05 | 0.0267 | GCCCCGCGC<br>G  |
| 1 | GCGCVTGCG<br>CV | TEX30        | - | 82  | 92  | 3.38E-<br>05 | 0.0267 | CCGGTGCGC<br>G  |
| 1 | GCGCVTGCG<br>CV | KIF1B        | + | 114 | 124 | 3.38E-<br>05 | 0.0267 | GCCCCGCGC<br>G  |

|   |                 |            |   |     |     |              |        |                 |
|---|-----------------|------------|---|-----|-----|--------------|--------|-----------------|
| 1 | GCGCVTGCG<br>CV | ABTB1      | + | 135 | 145 | 3.38E-<br>05 | 0.0267 | CCGGGTGCGC<br>G |
| 1 | GCGCVTGCG<br>CV | TCF20      | + | 138 | 148 | 3.38E-<br>05 | 0.0267 | GCCCCGCGC<br>G  |
| 1 | GCGCVTGCG<br>CV | MAD2L2     | - | 146 | 156 | 3.38E-<br>05 | 0.0267 | CCGGGTGCGC<br>G |
| 1 | GCGCVTGCG<br>CV | UXS1       | + | 157 | 167 | 3.38E-<br>05 | 0.0267 | GCCCCGCGC<br>G  |
| 1 | GCGCVTGCG<br>CV | EXT1       | - | 164 | 174 | 3.38E-<br>05 | 0.0267 | GCCCCGCGC<br>G  |
| 1 | GCGCVTGCG<br>CV | AGAP1      | - | 178 | 188 | 3.38E-<br>05 | 0.0267 | GCCCCGCGC<br>G  |
| 1 | GCGCVTGCG<br>CV | AC114812.5 | - | 111 | 121 | 3.41E-<br>05 | 0.0269 | GCACCCGCGC<br>A |
| 1 | GCGCVTGCG<br>CV | RAN        | + | 32  | 42  | 3.47E-<br>05 | 0.0273 | GCGTCGGCGC<br>A |
| 1 | GCGCVTGCG<br>CV | SLC35E1P1  | + | 22  | 32  | 3.49E-<br>05 | 0.0275 | GCGCTTGCCC<br>C |
| 1 | GCGCVTGCG<br>CV | MICAL3     | - | 46  | 56  | 3.55E-<br>05 | 0.0277 | GAGCGGGCG<br>CC |
| 1 | GCGCVTGCG<br>CV | CDC42BPG   | - | 48  | 58  | 3.55E-<br>05 | 0.0277 | CCGCATGCC<br>G  |
| 1 | GCGCVTGCG<br>CV | SNHG15     | + | 68  | 78  | 3.55E-<br>05 | 0.0277 | CCGCCTGTGC<br>G |
| 1 | GCGCVTGCG<br>CV | CCT6A      | + | 80  | 90  | 3.55E-<br>05 | 0.0277 | GAGCGGGCG<br>CC |
| 1 | GCGCVTGCG<br>CV | TAF4       | + | 19  | 29  | 3.59E-<br>05 | 0.0277 | GCGCCCGCCC<br>C |
| 1 | GCGCVTGCG<br>CV | CYTH1      | - | 24  | 34  | 3.59E-<br>05 | 0.0277 | GCGCCCGCCC<br>C |
| 1 | GCGCVTGCG<br>CV | ATXN7L1    | + | 34  | 44  | 3.59E-<br>05 | 0.0277 | GCGCCCGCCC<br>C |
| 1 | GCGCVTGCG<br>CV | MRPL20     | - | 41  | 51  | 3.59E-<br>05 | 0.0277 | GCGGGTGCCC<br>A |
| 1 | GCGCVTGCG<br>CV | MGRN1      | - | 41  | 51  | 3.59E-<br>05 | 0.0277 | GCGCCCGCCC<br>C |
| 1 | GCGCVTGCG<br>CV | KCNK3      | - | 64  | 74  | 3.59E-<br>05 | 0.0277 | GCGCCCGCCC<br>C |
| 1 | GCGCVTGCG<br>CV | HMGCS1     | - | 66  | 76  | 3.59E-<br>05 | 0.0277 | GCGCCCGCCC<br>C |
| 1 | GCGCVTGCG<br>CV | ANKMY1     | + | 77  | 87  | 3.59E-<br>05 | 0.0277 | GCGCCCGCCC<br>C |
| 1 | GCGCVTGCG<br>CV | POFUT1     | - | 80  | 90  | 3.59E-<br>05 | 0.0277 | GCGCCCGCCC<br>C |
| 1 | GCGCVTGCG<br>CV | FAM83H     | - | 82  | 92  | 3.59E-<br>05 | 0.0277 | GCGCCCGCCC<br>C |
| 1 | GCGCVTGCG<br>CV | ANAPC16    | - | 2   | 12  | 3.63E-<br>05 | 0.0277 | GCGCGCGCCC<br>G |
| 1 | GCGCVTGCG<br>CV | AC093620.5 | - | 11  | 21  | 3.63E-<br>05 | 0.0277 | GCGCGCGCCC<br>G |
| 1 | GCGCVTGCG<br>CV | PXN        | - | 15  | 25  | 3.63E-<br>05 | 0.0277 | CCCCCTGCGC<br>A |
| 1 | GCGCVTGCG<br>CV | SLX4       | + | 31  | 41  | 3.63E-<br>05 | 0.0277 | GCGCGCGCCC<br>G |

|   |                 |            |   |     |     |              |        |                 |
|---|-----------------|------------|---|-----|-----|--------------|--------|-----------------|
| 1 | GCGCVTGCG<br>CV | AFF1       | - | 27  | 37  | 3.63E-<br>05 | 0.0277 | GCGCGCGCCC<br>G |
| 1 | GCGCVTGCG<br>CV | B3GALNT1   | + | 43  | 53  | 3.63E-<br>05 | 0.0277 | GCGCGCGCCC<br>G |
| 1 | GCGCVTGCG<br>CV | PSMA1      | - | 37  | 47  | 3.63E-<br>05 | 0.0277 | GCGCGCGCCC<br>G |
| 1 | GCGCVTGCG<br>CV | C6orf48    | + | 48  | 58  | 3.63E-<br>05 | 0.0277 | GCGCGCGCCC<br>G |
| 1 | GCGCVTGCG<br>CV | GPATCH8    | + | 50  | 60  | 3.63E-<br>05 | 0.0277 | GCGCGCGCCC<br>G |
| 1 | GCGCVTGCG<br>CV | AC132812.1 | + | 54  | 64  | 3.63E-<br>05 | 0.0277 | GCGCGCGCCC<br>G |
| 1 | GCGCVTGCG<br>CV | AGO4       | - | 64  | 74  | 3.63E-<br>05 | 0.0277 | GCGCGCGCCC<br>G |
| 1 | GCGCVTGCG<br>CV | TMEM106C   | + | 82  | 92  | 3.63E-<br>05 | 0.0277 | GCGCGCGCCC<br>G |
| 1 | GCGCVTGCG<br>CV | RAB28      | + | 88  | 98  | 3.63E-<br>05 | 0.0277 | GCGCGCGCCC<br>G |
| 1 | GCGCVTGCG<br>CV | PPP5D1     | - | 79  | 89  | 3.63E-<br>05 | 0.0277 | GCGCGCGCCC<br>G |
| 1 | GCGCVTGCG<br>CV | KMT2C      | + | 106 | 116 | 3.63E-<br>05 | 0.0277 | GCGCGCGCCC<br>G |
| 1 | GCGCVTGCG<br>CV | PXN        | - | 115 | 125 | 3.63E-<br>05 | 0.0277 | GCGCGCGCCC<br>G |
| 1 | GCGCVTGCG<br>CV | FAM63B     | + | 145 | 155 | 3.63E-<br>05 | 0.0277 | GCGCGCGCCC<br>G |
| 1 | GCGCVTGCG<br>CV | LRP1-AS    | - | 17  | 27  | 3.67E-<br>05 | 0.0279 | GAGCCTGCC<br>C  |
| 1 | GCGCVTGCG<br>CV | NDUFS6     | + | 108 | 118 | 3.67E-<br>05 | 0.0279 | GAGCCTGCC<br>C  |
| 1 | GCGCVTGCG<br>CV | TAF4       | + | 48  | 58  | 3.72E-<br>05 | 0.0282 | GCCCAGGCG<br>G  |
| 1 | GCGCVTGCG<br>CV | UNC50      | - | 53  | 63  | 3.72E-<br>05 | 0.0282 | GCGGACGCG<br>CC |
| 1 | GCGCVTGCG<br>CV | USP2       | + | 84  | 94  | 3.72E-<br>05 | 0.0282 | GCCCAGGCG<br>G  |
| 1 | GCGCVTGCG<br>CV | LRP4       | + | 104 | 114 | 3.72E-<br>05 | 0.0282 | GCCCAGGCG<br>G  |
| 1 | GCGCVTGCG<br>CV | GDF9       | - | 32  | 42  | 3.77E-<br>05 | 0.0282 | GCGCCTGTCC<br>A |
| 1 | GCGCVTGCG<br>CV | THNSL1     | + | 84  | 94  | 3.77E-<br>05 | 0.0282 | GCACAGGCG<br>CA |
| 1 | GCGCVTGCG<br>CV | FAM195B    | - | 85  | 95  | 3.77E-<br>05 | 0.0282 | GCACAGGCG<br>CA |
| 1 | GCGCVTGCG<br>CV | PNO1       | + | 145 | 155 | 3.77E-<br>05 | 0.0282 | GCAGCTGCG<br>A  |
| 1 | GCGCVTGCG<br>CV | DDX3X      | - | 30  | 40  | 3.78E-<br>05 | 0.0282 | GCGGGGGCG<br>CC |
| 1 | GCGCVTGCG<br>CV | ETV6       | + | 50  | 60  | 3.78E-<br>05 | 0.0282 | GCGGGGGCG<br>CC |
| 1 | GCGCVTGCG<br>CV | ARHGAP32   | - | 40  | 50  | 3.78E-<br>05 | 0.0282 | GCGGGGGCG<br>CC |
| 1 | GCGCVTGCG<br>CV | TMEM223    | + | 59  | 69  | 3.78E-<br>05 | 0.0282 | GCGGGGGCG<br>CC |

|   |                 |             |   |     |     |              |        |                  |
|---|-----------------|-------------|---|-----|-----|--------------|--------|------------------|
| 1 | GCGCVTGCG<br>CV | COBL        | - | 50  | 60  | 3.78E-<br>05 | 0.0282 | GCGGGGGCG<br>CC  |
| 1 | GCGCVTGCG<br>CV | COBL        | - | 94  | 104 | 3.78E-<br>05 | 0.0282 | GCGGGGGCG<br>CC  |
| 1 | GCGCVTGCG<br>CV | GATS        | + | 131 | 141 | 3.78E-<br>05 | 0.0282 | GCACCCGCGC<br>G  |
| 1 | GCGCVTGCG<br>CV | CTC-507E2.2 | + | 144 | 154 | 3.78E-<br>05 | 0.0282 | GCGGGGGCG<br>CC  |
| 1 | GCGCVTGCG<br>CV | PIP5K1C     | - | 161 | 171 | 3.78E-<br>05 | 0.0282 | GCGGGGGCG<br>CC  |
| 1 | GCGCVTGCG<br>CV | ISOC1       | + | 171 | 181 | 3.78E-<br>05 | 0.0282 | GCGGGGGCG<br>CC  |
| 1 | GCGCVTGCG<br>CV | DIP2A       | - | 165 | 175 | 3.78E-<br>05 | 0.0282 | GCACCCGCGC<br>G  |
| 1 | GCGCVTGCG<br>CV | DNAJB9      | + | 64  | 74  | 3.80E-<br>05 | 0.0283 | GAGGATGCG<br>CC  |
| 1 | GCGCVTGCG<br>CV | WRB         | + | 126 | 136 | 3.82E-<br>05 | 0.0284 | GCGTCCGGCGC<br>G |
| 1 | GCGCVTGCG<br>CV | MYDGF       | + | 165 | 175 | 3.82E-<br>05 | 0.0284 | GCGTCCGGCGC<br>G |
| 1 | GCGCVTGCG<br>CV | DDX18       | + | 138 | 148 | 3.88E-<br>05 | 0.0288 | GCGCACGTGC<br>G  |
| 1 | GCGCVTGCG<br>CV | ZDHHC14     | + | 26  | 36  | 3.92E-<br>05 | 0.029  | GCGCCGGTGC<br>C  |
| 1 | GCGCVTGCG<br>CV | ST6GALNAC4  | + | 33  | 43  | 3.92E-<br>05 | 0.029  | GCGCAGGCC<br>C   |
| 1 | GCGCVTGCG<br>CV | BNIP3       | + | 90  | 100 | 3.92E-<br>05 | 0.029  | GCGCAGGCC<br>C   |
| 1 | GCGCVTGCG<br>CV | SAP130      | - | 85  | 95  | 3.92E-<br>05 | 0.029  | GCGCAGGCC<br>C   |
| 1 | GCGCVTGCG<br>CV | ZYX         | - | 22  | 32  | 3.94E-<br>05 | 0.029  | GCGGGTGCCC<br>G  |
| 1 | GCGCVTGCG<br>CV | SMDT1       | + | 146 | 156 | 3.94E-<br>05 | 0.029  | GCGGGTGCCC<br>G  |
| 1 | GCGCVTGCG<br>CV | KCNK3       | + | 157 | 167 | 3.94E-<br>05 | 0.029  | GCGGGTGCCC<br>G  |
| 1 | GCGCVTGCG<br>CV | DIP2A       | + | 166 | 176 | 3.94E-<br>05 | 0.029  | GCGCGGGTGC<br>G  |
| 1 | GCGCVTGCG<br>CV | YY1         | + | 41  | 51  | 3.99E-<br>05 | 0.0293 | CCGCACGCGC<br>C  |
| 1 | GCGCVTGCG<br>CV | SOX13       | + | 52  | 62  | 3.99E-<br>05 | 0.0293 | CCCCCTGCGC<br>G  |
| 1 | GCGCVTGCG<br>CV | AL353644.4  | - | 63  | 73  | 3.99E-<br>05 | 0.0293 | CCGCACGCGC<br>C  |
| 1 | GCGCVTGCG<br>CV | MIR4523     | - | 70  | 80  | 3.99E-<br>05 | 0.0293 | GCCCACGCGC<br>A  |
| 1 | GCGCVTGCG<br>CV | NRARP       | - | 5   | 15  | 4.03E-<br>05 | 0.0295 | ACGCGCGCGC<br>C  |
| 1 | GCGCVTGCG<br>CV | ZNF516      | + | 21  | 31  | 4.06E-<br>05 | 0.0296 | GCCCGGGCGC<br>A  |
| 1 | GCGCVTGCG<br>CV | BRD1        | + | 31  | 41  | 4.06E-<br>05 | 0.0296 | CCGCGGGCGC<br>C  |
| 1 | GCGCVTGCG<br>CV | SKI         | + | 79  | 89  | 4.06E-<br>05 | 0.0296 | CCGCGGGCGC<br>C  |

|   |                 |         |   |     |     |              |        |                 |
|---|-----------------|---------|---|-----|-----|--------------|--------|-----------------|
| 1 | GCGCVTGCG<br>CV | TRIO    | + | 105 | 115 | 4.06E-<br>05 | 0.0296 | CCGCGGGCGC<br>C |
| 1 | GCGCVTGCG<br>CV | SLC12A6 | - | 145 | 155 | 4.06E-<br>05 | 0.0296 | CCGCGGGCGC<br>C |
| 1 | GCGCVTGCG<br>CV | DLGAP4  | - | 148 | 158 | 4.06E-<br>05 | 0.0296 | CCGCGGGCGC<br>C |



**Supplementary Table 11. FIMO motif scanning using JASPAR motif matrices using default p-value cutoff 1e-4 (YY1)**

| YY1 motif<br>MA009<br>5.2 | Alt ID           | Sequence Name    | Strand | Start | End | p-value      | q-value     | Matched Sequence |
|---------------------------|------------------|------------------|--------|-------|-----|--------------|-------------|------------------|
| 1                         | MAAVATGGC<br>BGM | RP11-<br>512M8.5 | +      | 12    | 23  | 3.79<br>E-08 | 0.002<br>18 | CAAGATGGC<br>GGC |
| 1                         | MAAVATGGC<br>BGM | SPCS2            | +      | 82    | 93  | 3.79<br>E-08 | 0.002<br>18 | CAAGATGGC<br>GGC |
| 1                         | MAAVATGGC<br>BGM | SPCS2P4          | +      | 97    | 108 | 3.79<br>E-08 | 0.002<br>18 | CAAGATGGC<br>GGC |
| 1                         | MAAVATGGC<br>BGM | KMT2B            | +      | 97    | 108 | 3.79<br>E-08 | 0.002<br>18 | CAAGATGGC<br>GGC |
| 1                         | MAAVATGGC<br>BGM | UBA52            | +      | 114   | 125 | 3.79<br>E-08 | 0.002<br>18 | CAAGATGGC<br>GGC |
| 1                         | MAAVATGGC<br>BGM | YARS2            | +      | 125   | 136 | 3.79<br>E-08 | 0.002<br>18 | CAAGATGGC<br>GGC |
| 1                         | MAAVATGGC<br>BGM | NDUFS4           | +      | 127   | 138 | 3.79<br>E-08 | 0.002<br>18 | CAAGATGGC<br>GGC |
| 1                         | MAAVATGGC<br>BGM | PDHB             | +      | 145   | 156 | 3.79<br>E-08 | 0.002<br>18 | CAAGATGGC<br>GGC |
| 1                         | MAAVATGGC<br>BGM | GLG1             | +      | 147   | 158 | 3.79<br>E-08 | 0.002<br>18 | CAAGATGGC<br>GGC |
| 1                         | MAAVATGGC<br>BGM | PPP1R8           | +      | 155   | 166 | 3.79<br>E-08 | 0.002<br>18 | CAAGATGGC<br>GGC |
| 1                         | MAAVATGGC<br>BGM | TJAP1            | +      | 169   | 180 | 3.79<br>E-08 | 0.002<br>18 | CAAGATGGC<br>GGC |
| 1                         | MAAVATGGC<br>BGM | ZC3HC1           | +      | 182   | 193 | 3.79<br>E-08 | 0.002<br>18 | CAAGATGGC<br>GGC |
| 1                         | MAAVATGGC<br>BGM | RPN1             | -      | 41    | 52  | 3.79<br>E-08 | 0.002<br>18 | CAAGATGGC<br>GGC |
| 1                         | MAAVATGGC<br>BGM | SF3A1            | -      | 51    | 62  | 3.79<br>E-08 | 0.002<br>18 | CAAGATGGC<br>GGC |
| 1                         | MAAVATGGC<br>BGM | PRRC2C           | -      | 77    | 88  | 3.79<br>E-08 | 0.002<br>18 | CAAGATGGC<br>GGC |
| 1                         | MAAVATGGC<br>BGM | EP300            | -      | 93    | 104 | 3.79<br>E-08 | 0.002<br>18 | CAAGATGGC<br>GGC |
| 1                         | MAAVATGGC<br>BGM | SRP9             | -      | 114   | 125 | 3.79<br>E-08 | 0.002<br>18 | CAAGATGGC<br>GGC |
| 1                         | MAAVATGGC<br>BGM | CREBBP           | -      | 130   | 141 | 3.79<br>E-08 | 0.002<br>18 | CAAGATGGC<br>GGC |
| 1                         | MAAVATGGC<br>BGM | NDUFS6           | +      | 48    | 59  | 8.41<br>E-08 | 0.003<br>48 | CAAAATGGC<br>GGC |
| 1                         | MAAVATGGC<br>BGM | KDM2A            | +      | 115   | 126 | 8.41<br>E-08 | 0.003<br>48 | CAAAATGGC<br>GGC |

|   |                  |                 |   |     |     |              |             |                  |
|---|------------------|-----------------|---|-----|-----|--------------|-------------|------------------|
| 1 | MAAVATGGC<br>BGM | RBX1            | + | 149 | 160 | 8.41<br>E-08 | 0.003<br>48 | CAAAATGGC<br>GGC |
| 1 | MAAVATGGC<br>BGM | CIAPIN1         | - | 16  | 27  | 8.41<br>E-08 | 0.003<br>48 | CAAAATGGC<br>GGC |
| 1 | MAAVATGGC<br>BGM | ANAPC7          | - | 17  | 28  | 8.41<br>E-08 | 0.003<br>48 | CAAAATGGC<br>GGC |
| 1 | MAAVATGGC<br>BGM | RBM23           | - | 42  | 53  | 8.41<br>E-08 | 0.003<br>48 | CAAAATGGC<br>GGC |
| 1 | MAAVATGGC<br>BGM | ENSA            | - | 111 | 122 | 8.41<br>E-08 | 0.003<br>48 | CAAAATGGC<br>GGC |
| 1 | MAAVATGGC<br>BGM | ZBTB40          | + | 123 | 134 | 1.22<br>E-07 | 0.004<br>51 | CAAGATGGC<br>CGC |
| 1 | MAAVATGGC<br>BGM | MARK3           | - | 113 | 124 | 1.22<br>E-07 | 0.004<br>51 | CAAGATGGC<br>CGC |
| 1 | MAAVATGGC<br>BGM | ESD             | - | 166 | 177 | 1.22<br>E-07 | 0.004<br>51 | CAAGATGGC<br>CGC |
| 1 | MAAVATGGC<br>BGM | COMMD9          | + | 134 | 145 | 1.68<br>E-07 | 0.005<br>62 | CAAGATGGC<br>TGC |
| 1 | MAAVATGGC<br>BGM | DIDO1           | + | 178 | 189 | 1.68<br>E-07 | 0.005<br>62 | CAAGATGGC<br>TGC |
| 1 | MAAVATGGC<br>BGM | BTF3L4P1        | - | 34  | 45  | 1.68<br>E-07 | 0.005<br>62 | CAAGATGGC<br>TGC |
| 1 | MAAVATGGC<br>BGM | SRCAP           | - | 16  | 27  | 2.14<br>E-07 | 0.006<br>73 | CAAAATGGC<br>CGC |
| 1 | MAAVATGGC<br>BGM | ZNF814          | - | 32  | 43  | 2.14<br>E-07 | 0.006<br>73 | CAAAATGGC<br>CGC |
| 1 | MAAVATGGC<br>BGM | COX8A           | - | 108 | 119 | 2.71<br>E-07 | 0.008<br>24 | CAAAATGGC<br>TGC |
| 1 | MAAVATGGC<br>BGM | RRM1            | + | 100 | 111 | 3.09<br>E-07 | 0.008<br>41 | CAACATGGC<br>GGC |
| 1 | MAAVATGGC<br>BGM | MRPS14          | + | 114 | 125 | 3.09<br>E-07 | 0.008<br>41 | CAACATGGC<br>GGC |
| 1 | MAAVATGGC<br>BGM | MYDGF           | + | 133 | 144 | 3.09<br>E-07 | 0.008<br>41 | CAACATGGC<br>GGC |
| 1 | MAAVATGGC<br>BGM | RP5-<br>901A4.1 | - | 51  | 62  | 3.09<br>E-07 | 0.008<br>41 | CAACATGGC<br>GGC |
| 1 | MAAVATGGC<br>BGM | UBE2V2P<br>1    | + | 97  | 108 | 3.55<br>E-07 | 0.008<br>75 | CAAGATGGC<br>AGC |
| 1 | MAAVATGGC<br>BGM | HSD17B10        | + | 125 | 136 | 3.55<br>E-07 | 0.008<br>75 | CAAGATGGC<br>AGC |
| 1 | MAAVATGGC<br>BGM | COIL            | + | 132 | 143 | 3.55<br>E-07 | 0.008<br>75 | CAAGATGGC<br>AGC |
| 1 | MAAVATGGC<br>BGM | MRPL20          | + | 135 | 146 | 3.55<br>E-07 | 0.008<br>75 | CAAGATGGC<br>AGC |
| 1 | MAAVATGGC<br>BGM | KIAA1328        | + | 30  | 41  | 4.01<br>E-07 | 0.009<br>23 | CAAGATGGC<br>GGA |

|   |                  |                  |   |     |     |              |             |                  |
|---|------------------|------------------|---|-----|-----|--------------|-------------|------------------|
| 1 | MAAVATGGC<br>BGM | ATL2             | + | 122 | 133 | 4.01<br>E-07 | 0.009<br>23 | CAAGATGGC<br>GGA |
| 1 | MAAVATGGC<br>BGM | UBR1             | + | 188 | 199 | 4.01<br>E-07 | 0.009<br>23 | CAAGATGGC<br>GGA |
| 1 | MAAVATGGC<br>BGM | TRMT12           | + | 10  | 21  | 4.85<br>E-07 | 0.009<br>85 | AAAGATGGC<br>GGC |
| 1 | MAAVATGGC<br>BGM | NDUFA9           | + | 29  | 40  | 4.85<br>E-07 | 0.009<br>85 | AAAGATGGC<br>GGC |
| 1 | MAAVATGGC<br>BGM | TAF4             | + | 97  | 108 | 4.85<br>E-07 | 0.009<br>85 | AAAGATGGC<br>GGC |
| 1 | MAAVATGGC<br>BGM | LMAN2L           | + | 121 | 132 | 4.85<br>E-07 | 0.009<br>85 | AAAGATGGC<br>GGC |
| 1 | MAAVATGGC<br>BGM | MRPL22           | + | 138 | 149 | 4.85<br>E-07 | 0.009<br>85 | AAAGATGGC<br>GGC |
| 1 | MAAVATGGC<br>BGM | PSMB6            | + | 148 | 159 | 4.85<br>E-07 | 0.009<br>85 | AAAGATGGC<br>GGC |
| 1 | MAAVATGGC<br>BGM | MPDU1            | + | 4   | 15  | 5.69<br>E-07 | 0.010<br>3  | CAAGATGGC<br>GCC |
| 1 | MAAVATGGC<br>BGM | PSMB4            | + | 44  | 55  | 5.69<br>E-07 | 0.010<br>3  | CAACATGGC<br>TGC |
| 1 | MAAVATGGC<br>BGM | URM1             | + | 159 | 170 | 5.69<br>E-07 | 0.010<br>3  | CAACATGGC<br>TGC |
| 1 | MAAVATGGC<br>BGM | PTRHD1           | + | 44  | 55  | 6.07<br>E-07 | 0.010<br>3  | GAAGATGGC<br>GGC |
| 1 | MAAVATGGC<br>BGM | SLIRP            | + | 88  | 99  | 6.07<br>E-07 | 0.010<br>3  | GAAGATGGC<br>GGC |
| 1 | MAAVATGGC<br>BGM | PSMB7            | + | 116 | 127 | 6.07<br>E-07 | 0.010<br>3  | GAAGATGGC<br>GGC |
| 1 | MAAVATGGC<br>BGM | MRPL50           | + | 119 | 130 | 6.07<br>E-07 | 0.010<br>3  | GAAGATGGC<br>GGC |
| 1 | MAAVATGGC<br>BGM | ZCCHC4           | + | 122 | 133 | 6.07<br>E-07 | 0.010<br>3  | GAAGATGGC<br>GGC |
| 1 | MAAVATGGC<br>BGM | NGDN             | + | 125 | 136 | 6.07<br>E-07 | 0.010<br>3  | GAAGATGGC<br>GGC |
| 1 | MAAVATGGC<br>BGM | PRDX3            | + | 140 | 151 | 6.07<br>E-07 | 0.010<br>3  | GAAGATGGC<br>GGC |
| 1 | MAAVATGGC<br>BGM | RP11-<br>98L12.2 | + | 95  | 106 | 6.63<br>E-07 | 0.010<br>7  | CAAAATGGC<br>AGC |
| 1 | MAAVATGGC<br>BGM | RP11-<br>21L23.2 | + | 102 | 113 | 6.63<br>E-07 | 0.010<br>7  | CAAAATGGC<br>AGC |
| 1 | MAAVATGGC<br>BGM | PHB2             | - | 46  | 57  | 6.63<br>E-07 | 0.010<br>7  | CAAAATGGC<br>AGC |
| 1 | MAAVATGGC<br>BGM | CCDC167          | + | 25  | 36  | 7.56<br>E-07 | 0.011<br>7  | CAAGATGGC<br>GAC |
| 1 | MAAVATGGC<br>BGM | NECAP1           | + | 122 | 133 | 7.56<br>E-07 | 0.011<br>7  | CAAGATGGC<br>GAC |

|   |                  |                  |   |     |     |              |            |                  |
|---|------------------|------------------|---|-----|-----|--------------|------------|------------------|
| 1 | MAAVATGGC<br>BGM | SLC25A5P<br>6    | + | 165 | 176 | 7.56<br>E-07 | 0.011<br>7 | CAAGATGGC<br>GGT |
| 1 | MAAVATGGC<br>BGM | PSMC5            | - | 1   | 12  | 8.12<br>E-07 | 0.012      | CAAAATGGC<br>GGA |
| 1 | MAAVATGGC<br>BGM | KDM3A            | + | 139 | 150 | 8.12<br>E-07 | 0.012      | CAAAATGGC<br>GGA |
| 1 | MAAVATGGC<br>BGM | GPATCH8          | + | 157 | 168 | 8.12<br>E-07 | 0.012      | CAAAATGGC<br>GGA |
| 1 | MAAVATGGC<br>BGM | AP000304.<br>12  | + | 8   | 19  | 8.58<br>E-07 | 0.012<br>3 | CAAGATGGC<br>CGA |
| 1 | MAAVATGGC<br>BGM | RP11-<br>689C9.1 | + | 11  | 22  | 8.58<br>E-07 | 0.012<br>3 | CAAGATGGC<br>CGA |
| 1 | MAAVATGGC<br>BGM | ERH              | - | 28  | 39  | 1.02<br>E-06 | 0.014<br>4 | AAAAATGGC<br>GGC |
| 1 | MAAVATGGC<br>BGM | RPN1             | - | 96  | 107 | 1.06<br>E-06 | 0.014<br>7 | AAAGATGGC<br>CGC |
| 1 | MAAVATGGC<br>BGM | RPA2             | + | 128 | 139 | 1.06<br>E-06 | 0.014<br>7 | AAAGATGGC<br>CGC |
| 1 | MAAVATGGC<br>BGM | MAML1            | + | 93  | 104 | 1.20<br>E-06 | 0.016      | TAAGATGGC<br>GGC |
| 1 | MAAVATGGC<br>BGM | JPX_1            | + | 119 | 130 | 1.20<br>E-06 | 0.016      | TAAGATGGC<br>GGC |
| 1 | MAAVATGGC<br>BGM | SLC17A5          | + | 180 | 191 | 1.20<br>E-06 | 0.016      | TAAGATGGC<br>GGC |
| 1 | MAAVATGGC<br>BGM | RC3H1            | + | 96  | 107 | 1.24<br>E-06 | 0.016<br>2 | CAAGATGGC<br>CCC |
| 1 | MAAVATGGC<br>BGM | TMEM126<br>A     | + | 122 | 133 | 1.30<br>E-06 | 0.016<br>8 | AAAGATGGC<br>TGC |
| 1 | MAAVATGGC<br>BGM | KMT2E            | - | 13  | 24  | 1.34<br>E-06 | 0.016<br>9 | GAAAATGGC<br>GGC |
| 1 | MAAVATGGC<br>BGM | COPS6            | + | 134 | 145 | 1.34<br>E-06 | 0.016<br>9 | GAAAATGGC<br>GGC |
| 1 | MAAVATGGC<br>BGM | DYRK1B           | - | 146 | 157 | 1.58<br>E-06 | 0.019<br>5 | CAAAATGGC<br>GAC |
| 1 | MAAVATGGC<br>BGM | RNF139           | + | 163 | 174 | 1.58<br>E-06 | 0.019<br>5 | CAAGATGGT<br>GGC |
| 1 | MAAVATGGC<br>BGM | SGSM2            | + | 16  | 27  | 1.72<br>E-06 | 0.020<br>5 | GAAGATGGC<br>TGC |
| 1 | MAAVATGGC<br>BGM | ISCA2            | + | 52  | 63  | 1.72<br>E-06 | 0.020<br>5 | GAAGATGGC<br>TGC |
| 1 | MAAVATGGC<br>BGM | RBM8A            | + | 56  | 67  | 1.72<br>E-06 | 0.020<br>5 | CAAGATGGC<br>CAC |
| 1 | MAAVATGGC<br>BGM | MIR632           | - | 135 | 146 | 1.78<br>E-06 | 0.020<br>9 | CAAAATGGC<br>CGA |
| 1 | MAAVATGGC<br>BGM | TMED9            | + | 154 | 165 | 1.89<br>E-06 | 0.022      | CAAGATGGC<br>TGT |

|   |                  |                  |   |     |     |              |            |                  |
|---|------------------|------------------|---|-----|-----|--------------|------------|------------------|
| 1 | MAAVATGGC<br>BGM | TM2D3            | + | 127 | 138 | 1.98<br>E-06 | 0.022<br>7 | CAAGATGGC<br>GGG |
| 1 | MAAVATGGC<br>BGM | ATP5J2-<br>PTCD1 | + | 53  | 64  | 2.10<br>E-06 | 0.023<br>9 | CAAAATGGC<br>GTC |
| 1 | MAAVATGGC<br>BGM | DHX15            | - | 106 | 117 | 2.36<br>E-06 | 0.026<br>6 | TAAAATGGC<br>GGC |
| 1 | MAAVATGGC<br>BGM | KARS             | + | 8   | 19  | 2.56<br>E-06 | 0.028<br>2 | CAAGATGGA<br>CGC |
| 1 | MAAVATGGC<br>BGM | HNRNPC           | - | 165 | 176 | 2.56<br>E-06 | 0.028<br>2 | CAAAATGGC<br>CCC |
| 1 | MAAVATGGC<br>BGM | UQCR10           | + | 127 | 138 | 2.67<br>E-06 | 0.028<br>8 | AAACATGGC<br>GGC |
| 1 | MAAVATGGC<br>BGM | SCMH1            | + | 143 | 154 | 2.67<br>E-06 | 0.028<br>8 | AAACATGGC<br>GGC |
| 1 | MAAVATGGC<br>BGM | FAM193B          | - | 73  | 84  | 2.76<br>E-06 | 0.029<br>5 | CAATATGGC<br>GGC |
| 1 | MAAVATGGC<br>BGM | PLEKHA7          | + | 39  | 50  | 3.34<br>E-06 | 0.034<br>9 | GAACATGGC<br>GGC |
| 1 | MAAVATGGC<br>BGM | ISOC1            | + | 113 | 124 | 3.34<br>E-06 | 0.034<br>9 | GAACATGGC<br>GGC |
| 1 | MAAVATGGC<br>BGM | AC108004.<br>3   | - | 20  | 31  | 3.76<br>E-06 | 0.039      | AAAGATGGC<br>AGC |
| 1 | MAAVATGGC<br>BGM | PSMA2            | + | 62  | 73  | 4.00<br>E-06 | 0.040<br>2 | AAAGATGGC<br>GGA |
| 1 | MAAVATGGC<br>BGM | RPS15A           | - | 55  | 66  | 4.00<br>E-06 | 0.040<br>2 | AAAGATGGC<br>GGA |
| 1 | MAAVATGGC<br>BGM | RPL23AP6<br>4    | + | 97  | 108 | 4.00<br>E-06 | 0.040<br>2 | CAAGATGGC<br>ACC |
| 1 | MAAVATGGC<br>BGM | RP4-<br>761J14.8 | - | 5   | 16  | 4.11<br>E-06 | 0.040<br>6 | CAAAATGGC<br>TTC |
| 1 | MAAVATGGC<br>BGM | COA3             | + | 107 | 118 | 4.42<br>E-06 | 0.040<br>6 | CAACATGGC<br>GTC |
| 1 | MAAVATGGC<br>BGM | BCCIP            | + | 109 | 120 | 4.42<br>E-06 | 0.040<br>6 | CAACATGGC<br>GTC |
| 1 | MAAVATGGC<br>BGM | HECTD4           | + | 120 | 131 | 4.42<br>E-06 | 0.040<br>6 | CAACATGGC<br>GTC |
| 1 | MAAVATGGC<br>BGM | RLIMP1           | + | 181 | 192 | 4.42<br>E-06 | 0.040<br>6 | GAAGATGGC<br>AGC |
| 1 | MAAVATGGC<br>BGM | SMG6             | + | 48  | 59  | 4.51<br>E-06 | 0.040<br>6 | GAAGATGGC<br>GGA |
| 1 | MAAVATGGC<br>BGM | RPL13A           | + | 73  | 84  | 4.51<br>E-06 | 0.040<br>6 | GAAGATGGC<br>GGA |
| 1 | MAAVATGGC<br>BGM | PFDN2            | + | 82  | 93  | 4.51<br>E-06 | 0.040<br>6 | GAAGATGGC<br>GGA |
| 1 | MAAVATGGC<br>BGM | RP3-<br>340B19.2 | - | 76  | 87  | 4.51<br>E-06 | 0.040<br>6 | GAAGATGGC<br>GGA |

|   |                  |                   |   |     |     |              |            |                  |
|---|------------------|-------------------|---|-----|-----|--------------|------------|------------------|
| 1 | MAAVATGGC<br>BGM | RPL13AP5          | + | 97  | 108 | 4.51<br>E-06 | 0.040<br>6 | GAAGATGGC<br>GGA |
| 1 | MAAVATGGC<br>BGM | HIST1H2A<br>C     | - | 104 | 115 | 4.51<br>E-06 | 0.040<br>6 | AAACATGGC<br>CGC |
| 1 | MAAVATGGC<br>BGM | RPS11             | + | 189 | 200 | 4.51<br>E-06 | 0.040<br>6 | GAAGATGGC<br>GGA |
| 1 | MAAVATGGC<br>BGM | RPS3              | + | 159 | 170 | 4.81<br>E-06 | 0.042<br>9 | CAAGATGGC<br>AGT |
| 1 | MAAVATGGC<br>BGM | KBTBD4            | - | 17  | 28  | 4.90<br>E-06 | 0.043      | TAACATGGC<br>GGC |
| 1 | MAAVATGGC<br>BGM | ABT1              | + | 128 | 139 | 4.90<br>E-06 | 0.043      | CAACATGGA<br>GGC |
| 1 | MAAVATGGC<br>BGM | MRPL47            | + | 62  | 73  | 5.22<br>E-06 | 0.045<br>4 | AAACATGGC<br>TGC |
| 1 | MAAVATGGC<br>BGM | PSMD8             | - | 33  | 44  | 5.75<br>E-06 | 0.048<br>5 | GAACATGGC<br>TGC |
| 1 | MAAVATGGC<br>BGM | UFC1              | + | 89  | 100 | 5.75<br>E-06 | 0.048<br>5 | CAAAATGGC<br>CGG |
| 1 | MAAVATGGC<br>BGM | CTD-<br>2262B20.1 | + | 125 | 136 | 5.75<br>E-06 | 0.048<br>5 | GAAGATGGC<br>GCC |
| 1 | MAAVATGGC<br>BGM | YWHAQP<br>5       | + | 136 | 147 | 5.75<br>E-06 | 0.048<br>5 | CAACATGGC<br>CAC |
| 1 | MAAVATGGC<br>BGM | TMX2              | + | 116 | 127 | 5.94<br>E-06 | 0.049<br>6 | AAAGATGGC<br>GGT |
| 1 | MAAVATGGC<br>BGM | ZNF621            | + | 133 | 144 | 6.02<br>E-06 | 0.049<br>9 | CGAGATGGC<br>GGC |
| 1 | MAAVATGGC<br>BGM | RAB28             | + | 146 | 157 | 6.51<br>E-06 | 0.053<br>1 | CAAGATGGC<br>GCT |
| 1 | MAAVATGGC<br>BGM | RPL39L            | - | 139 | 150 | 6.51<br>E-06 | 0.053<br>1 | CAACATGGC<br>TGT |
| 1 | MAAVATGGC<br>BGM | PSMB5             | + | 107 | 118 | 6.60<br>E-06 | 0.053<br>4 | AAAGATGGC<br>CGA |
| 1 | MAAVATGGC<br>BGM | TIMM17A           | + | 133 | 144 | 6.81<br>E-06 | 0.053<br>7 | CAAGATGGA<br>GGA |
| 1 | MAAVATGGC<br>BGM | RP11-<br>411B6.6  | + | 27  | 38  | 7.00<br>E-06 | 0.053<br>7 | GAAGATGGC<br>GGT |
| 1 | MAAVATGGC<br>BGM | ZNFX1-<br>AS1_2   | + | 37  | 48  | 7.00<br>E-06 | 0.053<br>7 | GAAGATGGC<br>GGT |
| 1 | MAAVATGGC<br>BGM | INTS7             | + | 48  | 59  | 7.00<br>E-06 | 0.053<br>7 | GAAGATGGC<br>GGT |
| 1 | MAAVATGGC<br>BGM | COMMD1<br>0       | + | 59  | 70  | 7.00<br>E-06 | 0.053<br>7 | GAAGATGGC<br>GGT |
| 1 | MAAVATGGC<br>BGM | ING5              | + | 128 | 139 | 7.00<br>E-06 | 0.053<br>7 | GAAGATGGC<br>GAC |
| 1 | MAAVATGGC<br>BGM | ARHGAP1<br>9      | + | 143 | 154 | 7.00<br>E-06 | 0.053<br>7 | GAAGATGGC<br>GAC |

|   |                  |                   |   |     |     |              |            |                  |
|---|------------------|-------------------|---|-----|-----|--------------|------------|------------------|
| 1 | MAAVATGGC<br>BGM | RP11-<br>571F15.2 | - | 44  | 55  | 8.00<br>E-06 | 0.061      | CAAGATGGT<br>GGA |
| 1 | MAAVATGGC<br>BGM | NDUFA7            | + | 35  | 46  | 8.21<br>E-06 | 0.062<br>1 | GAAGATGGC<br>GTC |
| 1 | MAAVATGGC<br>BGM | ANXA7             | - | 113 | 124 | 8.41<br>E-06 | 0.063      | CAAGATGGA<br>GCC |
| 1 | MAAVATGGC<br>BGM | RPL6P27           | + | 102 | 113 | 8.46<br>E-06 | 0.063      | CAAGATGGC<br>AGG |
| 1 | MAAVATGGC<br>BGM | AL590762.<br>11   | + | 109 | 120 | 8.90<br>E-06 | 0.065<br>9 | GAAGATGGA<br>GGC |
| 1 | MAAVATGGC<br>BGM | COX6A1            | + | 134 | 145 | 9.14<br>E-06 | 0.067<br>1 | AAAAATGGC<br>GGT |
| 1 | MAAVATGGC<br>BGM | TMEM39A           | + | 17  | 28  | 9.35<br>E-06 | 0.068<br>2 | AAAGATGGC<br>CAC |
| 1 | MAAVATGGC<br>BGM | DYRK1B            | - | 42  | 53  | 9.44<br>E-06 | 0.068<br>4 | CGAGATGGC<br>CGC |
| 1 | MAAVATGGC<br>BGM | ATP5I             | + | 88  | 99  | 9.96<br>E-06 | 0.070<br>7 | CAAGATGGT<br>GCC |
| 1 | MAAVATGGC<br>BGM | NUP205            | + | 123 | 134 | 9.96<br>E-06 | 0.070<br>7 | TAAGATGGC<br>GAC |
| 1 | MAAVATGGC<br>BGM | KANSL2            | + | 154 | 165 | 9.96<br>E-06 | 0.070<br>7 | TAAGATGGC<br>GGT |
| 1 | MAAVATGGC<br>BGM | PSMB1             | - | 146 | 157 | 1.07<br>E-05 | 0.075<br>2 | CGAGATGGC<br>TGC |
| 1 | MAAVATGGC<br>BGM | RP11-<br>730A19.5 | + | 28  | 39  | 1.10<br>E-05 | 0.076<br>7 | GAAGATGGT<br>GGC |
| 1 | MAAVATGGC<br>BGM | XYLT1             | + | 182 | 193 | 1.10<br>E-05 | 0.076<br>7 | GAAGATGGT<br>GGC |
| 1 | MAAVATGGC<br>BGM | DGKD              | + | 109 | 120 | 1.16<br>E-05 | 0.079<br>4 | CAGCATGGC<br>GGC |
| 1 | MAAVATGGC<br>BGM | C1orf43           | - | 63  | 74  | 1.16<br>E-05 | 0.079<br>4 | AAACATGGC<br>GGA |
| 1 | MAAVATGGC<br>BGM | RPL35A            | - | 83  | 94  | 1.19<br>E-05 | 0.081<br>1 | CAAAATGGT<br>AGC |
| 1 | MAAVATGGC<br>BGM | RP11-<br>846F4.6  | - | 70  | 81  | 1.23<br>E-05 | 0.082<br>3 | TAAGATGGC<br>TGA |
| 1 | MAAVATGGC<br>BGM | PSMD8             | - | 125 | 136 | 1.23<br>E-05 | 0.082<br>3 | CAAGATGGT<br>GAC |
| 1 | MAAVATGGC<br>BGM | SEN3-<br>EIF4A1   | + | 89  | 100 | 1.24<br>E-05 | 0.082<br>3 | CAAGATGGA<br>GTC |
| 1 | MAAVATGGC<br>BGM | RFT1              | - | 93  | 104 | 1.24<br>E-05 | 0.082<br>3 | TAAGATGGC<br>GTC |
| 1 | MAAVATGGC<br>BGM | SFSWAP            | - | 104 | 115 | 1.28<br>E-05 | 0.084<br>7 | CAAAATGGT<br>GGA |
| 1 | MAAVATGGC<br>BGM | DOCK5             | + | 178 | 189 | 1.33<br>E-05 | 0.087<br>2 | GAACATGGC<br>GGA |

|   |                  |                   |   |     |     |              |            |                  |
|---|------------------|-------------------|---|-----|-----|--------------|------------|------------------|
| 1 | MAAVATGGC<br>BGM | DOLK              | + | 98  | 109 | 1.39<br>E-05 | 0.089<br>4 | CAAGATGGC<br>GAG |
| 1 | MAAVATGGC<br>BGM | RP11-<br>8P13.1   | - | 20  | 31  | 1.39<br>E-05 | 0.089<br>4 | CAAGATGGC<br>GAG |
| 1 | MAAVATGGC<br>BGM | MNT               | - | 153 | 164 | 1.39<br>E-05 | 0.089<br>4 | CAAGATGGC<br>GAG |
| 1 | MAAVATGGC<br>BGM | RP11-<br>640A1.4  | + | 97  | 108 | 1.44<br>E-05 | 0.090<br>1 | CAAGATGGT<br>GTC |
| 1 | MAAVATGGC<br>BGM | UFC1              | + | 188 | 199 | 1.45<br>E-05 | 0.090<br>1 | CAACATGGC<br>GAA |
| 1 | MAAVATGGC<br>BGM | RASL11A           | - | 43  | 54  | 1.45<br>E-05 | 0.090<br>1 | CAACATGGC<br>GAA |
| 1 | MAAVATGGC<br>BGM | Z83851.4          | - | 86  | 97  | 1.45<br>E-05 | 0.090<br>1 | GAAAATGGA<br>GGC |
| 1 | MAAVATGGC<br>BGM | CTA-<br>243E7.4   | - | 111 | 122 | 1.45<br>E-05 | 0.090<br>1 | CAACATGGC<br>GAA |
| 1 | MAAVATGGC<br>BGM | RP11-<br>894P9.1  | - | 115 | 126 | 1.45<br>E-05 | 0.090<br>1 | CAACATGGC<br>GAA |
| 1 | MAAVATGGC<br>BGM | RPL7P14           | + | 97  | 108 | 1.51<br>E-05 | 0.092<br>9 | AAAGATGGC<br>AGA |
| 1 | MAAVATGGC<br>BGM | RP11-<br>243J16.7 | + | 140 | 151 | 1.58<br>E-05 | 0.096<br>5 | CAAAATGGA<br>GGT |
| 1 | MAAVATGGC<br>BGM | AC114812.<br>9    | + | 9   | 20  | 1.65<br>E-05 | 0.099<br>1 | GAAAATGGC<br>TCC |
| 1 | MAAVATGGC<br>BGM | NDUFB5            | + | 68  | 79  | 1.65<br>E-05 | 0.099<br>1 | TAAGATGGC<br>CAC |
| 1 | MAAVATGGC<br>BGM | CCDC175           | + | 153 | 164 | 1.65<br>E-05 | 0.099<br>1 | CAAAATGGC<br>CCT |
| 1 | MAAVATGGC<br>BGM | NSL1              | + | 61  | 72  | 1.73<br>E-05 | 0.103      | AAAAATGGC<br>GGG |
| 1 | MAAVATGGC<br>BGM | RPL13AP5          | - | 158 | 169 | 1.73<br>E-05 | 0.103      | CACGATGGC<br>CGC |
| 1 | MAAVATGGC<br>BGM | HMBOX1            | + | 110 | 121 | 1.78<br>E-05 | 0.105      | CAATATGGC<br>GGT |
| 1 | MAAVATGGC<br>BGM | TMED10            | + | 51  | 62  | 1.86<br>E-05 | 0.108      | CAAAATGGC<br>GCG |
| 1 | MAAVATGGC<br>BGM | RP11-<br>8P13.1   | - | 110 | 121 | 1.86<br>E-05 | 0.108      | AAAAATGGC<br>CTC |
| 1 | MAAVATGGC<br>BGM | CSE1L             | - | 169 | 180 | 1.86<br>E-05 | 0.108      | CAAAATGGC<br>GCG |
| 1 | MAAVATGGC<br>BGM | NPM3              | + | 120 | 131 | 1.87<br>E-05 | 0.108      | CAGCATGGC<br>CGC |
| 1 | MAAVATGGC<br>BGM | MT-TY             | + | 15  | 26  | 1.90<br>E-05 | 0.108      | TAAAATGGC<br>TGA |
| 1 | MAAVATGGC<br>BGM | TMEM126<br>B      | + | 132 | 143 | 1.90<br>E-05 | 0.108      | CAAAATGGT<br>GGT |



|   |                  |                   |   |     |     |              |       |                  |
|---|------------------|-------------------|---|-----|-----|--------------|-------|------------------|
| 1 | MAAVATGGC<br>BGM | MTCO1P1<br>1      | - | 74  | 85  | 1.90<br>E-05 | 0.108 | TAAAATGGC<br>TGA |
| 1 | MAAVATGGC<br>BGM | MRFAP1L<br>1      | - | 116 | 127 | 1.94<br>E-05 | 0.11  | CAAAATGGA<br>GTC |
| 1 | MAAVATGGC<br>BGM | RP11-<br>420B22.1 | - | 43  | 54  | 2.03<br>E-05 | 0.115 | AAAAATGGC<br>TTC |
| 1 | MAAVATGGC<br>BGM | TWISTNB           | + | 168 | 179 | 2.07<br>E-05 | 0.116 | CAGCATGGC<br>TGC |
| 1 | MAAVATGGC<br>BGM | AC011816.<br>1    | + | 97  | 108 | 2.13<br>E-05 | 0.119 | GAAAATGGC<br>CTC |
| 1 | MAAVATGGC<br>BGM | FOXK1             | + | 97  | 108 | 2.15<br>E-05 | 0.119 | GAACATGGC<br>CGA |
| 1 | MAAVATGGC<br>BGM | KB-<br>1247B1.1   | + | 97  | 108 | 2.19<br>E-05 | 0.121 | CAAGATGGT<br>GGG |
| 1 | MAAVATGGC<br>BGM | AC007283.<br>5    | + | 36  | 47  | 2.27<br>E-05 | 0.125 | CGAGATGGC<br>AGC |
| 1 | MAAVATGGC<br>BGM | AL132772.<br>1    | - | 39  | 50  | 2.29<br>E-05 | 0.125 | CAAGATGGT<br>CTC |
| 1 | MAAVATGGC<br>BGM | CTD-<br>2215L10.1 | - | 22  | 33  | 2.33<br>E-05 | 0.126 | CAATATGGA<br>GGC |
| 1 | MAAVATGGC<br>BGM | RPL24P4           | - | 103 | 114 | 2.40<br>E-05 | 0.129 | AAAGATGGC<br>GAA |
| 1 | MAAVATGGC<br>BGM | RPL24             | - | 172 | 183 | 2.40<br>E-05 | 0.129 | AAAGATGGC<br>GAA |
| 1 | MAAVATGGC<br>BGM | HNRNPM<br>P1      | + | 130 | 141 | 2.48<br>E-05 | 0.132 | CAAGATGGA<br>AGA |
| 1 | MAAVATGGC<br>BGM | COX7B             | - | 120 | 131 | 2.48<br>E-05 | 0.132 | CAAAATGGC<br>TTT |
| 1 | MAAVATGGC<br>BGM | RPL29P14          | - | 34  | 45  | 2.53<br>E-05 | 0.133 | GAAAATGGA<br>TGC |
| 1 | MAAVATGGC<br>BGM | RP11-<br>677I18.3 | - | 60  | 71  | 2.53<br>E-05 | 0.133 | GAAAATGGA<br>TGC |
| 1 | MAAVATGGC<br>BGM | RPL21P12<br>3     | - | 73  | 84  | 2.57<br>E-05 | 0.134 | GAAGATGGC<br>AGT |
| 1 | MAAVATGGC<br>BGM | SUCLA2P<br>1      | - | 107 | 118 | 2.58<br>E-05 | 0.134 | GAACATGGA<br>GGC |
| 1 | MAAVATGGC<br>BGM | RPS27             | + | 28  | 39  | 2.61<br>E-05 | 0.134 | AAACATGGT<br>GGC |
| 1 | MAAVATGGC<br>BGM | RP5-<br>849H19.2  | - | 101 | 112 | 2.61<br>E-05 | 0.134 | CACAATGGC<br>CGC |
| 1 | MAAVATGGC<br>BGM | RP11-<br>391L3.5  | + | 47  | 58  | 2.65<br>E-05 | 0.136 | AAACATGGC<br>CAC |
| 1 | MAAVATGGC<br>BGM | NPEPPS            | - | 105 | 116 | 2.71<br>E-05 | 0.138 | TAAAATGGC<br>TGT |
| 1 | MAAVATGGC<br>BGM | RPN2              | - | 17  | 28  | 2.79<br>E-05 | 0.14  | CAACATGGA<br>GGT |

|   |                  |                   |   |     |     |              |       |                  |
|---|------------------|-------------------|---|-----|-----|--------------|-------|------------------|
| 1 | MAAVATGGC<br>BGM | RP11-<br>512F24.1 | + | 97  | 108 | 2.79<br>E-05 | 0.14  | CAAAATGGA<br>GGG |
| 1 | MAAVATGGC<br>BGM | OSTC              | + | 169 | 180 | 2.79<br>E-05 | 0.14  | CAACATGGA<br>GAC |
| 1 | MAAVATGGC<br>BGM | CEP350            | + | 29  | 40  | 2.82<br>E-05 | 0.141 | CAACATGGC<br>CCT |
| 1 | MAAVATGGC<br>BGM | RP4-<br>781K5.2   | - | 108 | 119 | 2.91<br>E-05 | 0.145 | AAACATGGC<br>TGT |
| 1 | MAAVATGGC<br>BGM | PSMC4             | + | 41  | 52  | 2.94<br>E-05 | 0.145 | CGAGATGGC<br>GCC |
| 1 | MAAVATGGC<br>BGM | RP11-<br>314D7.2  | - | 54  | 65  | 2.94<br>E-05 | 0.145 | CGAGATGGC<br>GCC |
| 1 | MAAVATGGC<br>BGM | MTND4P2<br>3      | + | 75  | 86  | 2.98<br>E-05 | 0.146 | CAATATGGC<br>TAC |
| 1 | MAAVATGGC<br>BGM | RP11-<br>378E13.3 | - | 182 | 193 | 2.98<br>E-05 | 0.146 | GAACATGGT<br>GGC |
| 1 | MAAVATGGC<br>BGM | ZNF785            | - | 143 | 154 | 3.04<br>E-05 | 0.147 | CAAGATGGA<br>ACC |
| 1 | MAAVATGGC<br>BGM | NFAT5             | - | 166 | 177 | 3.04<br>E-05 | 0.147 | AAAGATGGA<br>GGA |
| 1 | MAAVATGGC<br>BGM | HINT1             | + | 51  | 62  | 3.13<br>E-05 | 0.151 | AAGGATGGC<br>TGC |
| 1 | MAAVATGGC<br>BGM | RPL23AP6<br>4     | + | 44  | 55  | 3.19<br>E-05 | 0.153 | CAACATGGT<br>GAC |
| 1 | MAAVATGGC<br>BGM | RP11-<br>21J18.1  | - | 3   | 14  | 3.32<br>E-05 | 0.158 | GAACATGGC<br>GGG |
| 1 | MAAVATGGC<br>BGM | SRSF3             | - | 109 | 120 | 3.50<br>E-05 | 0.166 | CGAAATGGC<br>GGA |
| 1 | MAAVATGGC<br>BGM | AC094019.<br>4    | - | 71  | 82  | 3.67<br>E-05 | 0.173 | GAAGATGGC<br>GAT |
| 1 | MAAVATGGC<br>BGM | RP11-<br>216N14.7 | + | 99  | 110 | 3.72<br>E-05 | 0.174 | AAAATGGC<br>ATC  |
| 1 | MAAVATGGC<br>BGM | RPL39             | - | 130 | 141 | 3.72<br>E-05 | 0.174 | CACGATGGC<br>GGA |
| 1 | MAAVATGGC<br>BGM | TEKT4P2           | - | 87  | 98  | 3.78<br>E-05 | 0.177 | GAAAATGGC<br>GAA |
| 1 | MAAVATGGC<br>BGM | YARS2             | - | 135 | 146 | 3.80<br>E-05 | 0.177 | CAAGATGGG<br>CGC |
| 1 | MAAVATGGC<br>BGM | RP11-<br>709D24.6 | + | 14  | 25  | 3.84<br>E-05 | 0.178 | CAGAATGGC<br>TGA |
| 1 | MAAVATGGC<br>BGM | AC011816.<br>1    | + | 5   | 16  | 3.90<br>E-05 | 0.178 | CAACATGGC<br>ACA |
| 1 | MAAVATGGC<br>BGM | MTND5P1<br>1      | + | 14  | 25  | 3.90<br>E-05 | 0.178 | CAACATGGC<br>TTT |
| 1 | MAAVATGGC<br>BGM | MT-TS2            | + | 44  | 55  | 3.90<br>E-05 | 0.178 | CAACATGGC<br>TTT |

|   |                  |                   |   |     |     |              |       |                  |
|---|------------------|-------------------|---|-----|-----|--------------|-------|------------------|
| 1 | MAAVATGGC<br>BGM | FUNDC2            | + | 76  | 87  | 3.97<br>E-05 | 0.179 | CAGGATGGC<br>CTC |
| 1 | MAAVATGGC<br>BGM | PSMB5             | + | 135 | 146 | 3.97<br>E-05 | 0.179 | CAACATGGA<br>CGT |
| 1 | MAAVATGGC<br>BGM | RPL15P3           | + | 97  | 108 | 4.07<br>E-05 | 0.182 | CAAGATGGG<br>TGC |
| 1 | MAAVATGGC<br>BGM | LINC0142<br>0     | - | 124 | 135 | 4.07<br>E-05 | 0.182 | TGAGATGGC<br>GGC |
| 1 | MAAVATGGC<br>BGM | WDR38             | + | 82  | 93  | 4.09<br>E-05 | 0.183 | CACCATGGC<br>CGC |
| 1 | MAAVATGGC<br>BGM | SEC61G            | + | 13  | 24  | 4.17<br>E-05 | 0.184 | AAACATGGC<br>CGG |
| 1 | MAAVATGGC<br>BGM | PSMB4             | + | 151 | 162 | 4.17<br>E-05 | 0.184 | TAAGATGGA<br>AGC |
| 1 | MAAVATGGC<br>BGM | SMIM18            | - | 62  | 73  | 4.24<br>E-05 | 0.185 | CAAGATGGA<br>GCT |
| 1 | MAAVATGGC<br>BGM | RP11-<br>235E17.3 | - | 67  | 78  | 4.24<br>E-05 | 0.185 | CAACATGGA<br>TGT |
| 1 | MAAVATGGC<br>BGM | SPDYE1            | + | 150 | 161 | 4.24<br>E-05 | 0.185 | AAAGATGGC<br>TTA |
| 1 | MAAVATGGC<br>BGM | AC107081.<br>5    | - | 61  | 72  | 4.28<br>E-05 | 0.186 | AAAAATGGC<br>CCA |
| 1 | MAAVATGGC<br>BGM | SF1               | - | 167 | 178 | 4.30<br>E-05 | 0.186 | GGAAATGGC<br>GGC |
| 1 | MAAVATGGC<br>BGM | SLC25A5P<br>6     | - | 154 | 165 | 4.37<br>E-05 | 0.188 | GGAGATGGC<br>CGC |
| 1 | MAAVATGGC<br>BGM | RP13-<br>638C3.2  | - | 10  | 21  | 4.40<br>E-05 | 0.188 | CAACATGGC<br>AAA |
| 1 | MAAVATGGC<br>BGM | GUSBP11           | + | 40  | 51  | 4.47<br>E-05 | 0.188 | AAAGATGGC<br>GCG |
| 1 | MAAVATGGC<br>BGM | AP000347.<br>2    | + | 40  | 51  | 4.47<br>E-05 | 0.188 | AAAGATGGC<br>GCG |
| 1 | MAAVATGGC<br>BGM | CTNNB1            | + | 121 | 132 | 4.47<br>E-05 | 0.188 | AAAGATGGC<br>GCG |
| 1 | MAAVATGGC<br>BGM | RPL41P2           | - | 114 | 125 | 4.47<br>E-05 | 0.188 | GAAAATGGC<br>GCT |
| 1 | MAAVATGGC<br>BGM | TNRC6A            | + | 139 | 150 | 4.47<br>E-05 | 0.188 | GAAAATGGC<br>GCT |
| 1 | MAAVATGGC<br>BGM | WIZ               | + | 21  | 32  | 4.57<br>E-05 | 0.19  | CATCATGGC<br>GGC |
| 1 | MAAVATGGC<br>BGM | RPL31P58          | + | 103 | 114 | 4.57<br>E-05 | 0.19  | CAGAATGGC<br>TCC |
| 1 | MAAVATGGC<br>BGM | RP11-<br>214N15.5 | + | 127 | 138 | 4.57<br>E-05 | 0.19  | GAAGATGGC<br>CCT |
| 1 | MAAVATGGC<br>BGM | RP11-<br>58K22.4  | + | 177 | 188 | 4.57<br>E-05 | 0.19  | AAAGATGGT<br>GGT |

|   |                  |                          |   |     |     |              |       |                  |
|---|------------------|--------------------------|---|-----|-----|--------------|-------|------------------|
| 1 | MAAVATGGC<br>BGM | PER1                     | + | 8   | 19  | 4.63<br>E-05 | 0.19  | GACGATGGC<br>GGC |
| 1 | MAAVATGGC<br>BGM | RP1-<br>292B18.1         | - | 75  | 86  | 4.65<br>E-05 | 0.19  | GGAGATGGC<br>TGC |
| 1 | MAAVATGGC<br>BGM | RPL32                    | - | 178 | 189 | 4.65<br>E-05 | 0.19  | GGAGATGGC<br>TGC |
| 1 | MAAVATGGC<br>BGM | bP-<br>2171C21.6         | - | 8   | 19  | 4.95<br>E-05 | 0.202 | CAACATGGC<br>CAG |
| 1 | MAAVATGGC<br>BGM | CTD-<br>2036J7.1         | - | 74  | 85  | 5.06<br>E-05 | 0.206 | GAAGATGGT<br>GGT |
| 1 | MAAVATGGC<br>BGM | KMT2A                    | + | 120 | 131 | 5.14<br>E-05 | 0.207 | GAACATGGC<br>GCA |
| 1 | MAAVATGGC<br>BGM | MSANTD4                  | + | 134 | 145 | 5.14<br>E-05 | 0.207 | CAGAATGGC<br>TAC |
| 1 | MAAVATGGC<br>BGM | H2AFZP3                  | + | 97  | 108 | 5.17<br>E-05 | 0.208 | CGAAATGGC<br>TGA |
| 1 | MAAVATGGC<br>BGM | COX7A2L                  | + | 103 | 114 | 5.23<br>E-05 | 0.209 | CAGCATGGC<br>GGT |
| 1 | MAAVATGGC<br>BGM | XXbac-<br>B476C20.1<br>3 | + | 142 | 153 | 5.30<br>E-05 | 0.21  | CAAATGGT<br>AAC  |
| 1 | MAAVATGGC<br>BGM | WDR88                    | + | 177 | 188 | 5.30<br>E-05 | 0.21  | CGAGATGGC<br>CTC |
| 1 | MAAVATGGC<br>BGM | NSRP1P1                  | + | 95  | 106 | 5.36<br>E-05 | 0.211 | CAAGATGGT<br>GAT |
| 1 | MAAVATGGC<br>BGM | LINC0050<br>4            | - | 107 | 118 | 5.39<br>E-05 | 0.211 | TAACATGGC<br>AGA |
| 1 | MAAVATGGC<br>BGM | NDUFA12                  | + | 187 | 198 | 5.39<br>E-05 | 0.211 | CAAGATGGA<br>GTT |
| 1 | MAAVATGGC<br>BGM | SNRPF                    | - | 120 | 131 | 5.43<br>E-05 | 0.211 | AGAAATGGC<br>CGC |
| 1 | MAAVATGGC<br>BGM | C17orf100                | + | 97  | 108 | 5.43<br>E-05 | 0.211 | CAGAATGGC<br>CTC |
| 1 | MAAVATGGC<br>BGM | TPT1P10                  | - | 92  | 103 | 5.45<br>E-05 | 0.211 | CATGATGGC<br>AGC |
| 1 | MAAVATGGC<br>BGM | RP11-<br>181G12.2        | - | 94  | 105 | 5.45<br>E-05 | 0.211 | CAGCATGGC<br>CGA |
| 1 | MAAVATGGC<br>BGM | KDELR2                   | - | 188 | 199 | 5.50<br>E-05 | 0.212 | GAAGATGGC<br>GAG |
| 1 | MAAVATGGC<br>BGM | FP325331.<br>1           | - | 87  | 98  | 5.82<br>E-05 | 0.223 | CAGGATGGC<br>GCA |
| 1 | MAAVATGGC<br>BGM | RPL7A                    | - | 166 | 177 | 5.86<br>E-05 | 0.223 | GAGGATGGC<br>AGC |
| 1 | MAAVATGGC<br>BGM | ZXDC                     | + | 151 | 162 | 5.86<br>E-05 | 0.223 | CAAGATGGA<br>CCT |
| 1 | MAAVATGGC        | LA16c-                   | - | 113 | 124 | 5.98         | 0.227 | CACGATGGA        |

|   |                  |                   |   |     |     |              |       |                  |
|---|------------------|-------------------|---|-----|-----|--------------|-------|------------------|
|   | BGM              | 361A3.3           |   |     |     | E-05         |       | GGC              |
| 1 | MAAVATGGC<br>BGM | DHX9              | - | 76  | 87  | 6.03<br>E-05 | 0.227 | CGAAATGGC<br>TCC |
| 1 | MAAVATGGC<br>BGM | RP11-<br>326N17.2 | - | 99  | 110 | 6.03<br>E-05 | 0.227 | CAAGATGGA<br>TTA |
| 1 | MAAVATGGC<br>BGM | SNX18P1<br>Y      | - | 73  | 84  | 6.21<br>E-05 | 0.232 | CAGAATGGA<br>TGC |
| 1 | MAAVATGGC<br>BGM | SNX18P25          | - | 95  | 106 | 6.21<br>E-05 | 0.232 | CAGAATGGA<br>TGC |
| 1 | MAAVATGGC<br>BGM | TMEM131           | + | 66  | 77  | 6.28<br>E-05 | 0.232 | CAGTATGGC<br>CGC |
| 1 | MAAVATGGC<br>BGM | PARL              | + | 84  | 95  | 6.28<br>E-05 | 0.232 | GAAGATGGC<br>GTG |
| 1 | MAAVATGGC<br>BGM | HMGB3P4           | + | 95  | 106 | 6.28<br>E-05 | 0.232 | CAGGATGGC<br>AAC |
| 1 | MAAVATGGC<br>BGM | AC010642.<br>1    | - | 13  | 24  | 6.34<br>E-05 | 0.233 | GACAATGGC<br>GGC |
| 1 | MAAVATGGC<br>BGM | SNORD17           | - | 60  | 71  | 6.34<br>E-05 | 0.233 | CAACATGGA<br>ACC |
| 1 | MAAVATGGC<br>BGM | RP11-<br>158H5.8  | + | 174 | 185 | 6.40<br>E-05 | 0.234 | TAACATGGC<br>TGG |
| 1 | MAAVATGGC<br>BGM | RP11-<br>351I24.3 | - | 95  | 106 | 6.52<br>E-05 | 0.236 | GGACATGGC<br>GGC |
| 1 | MAAVATGGC<br>BGM | RBM8A             | + | 26  | 37  | 6.52<br>E-05 | 0.236 | TAAGATGGA<br>TGA |
| 1 | MAAVATGGC<br>BGM | LINC0088<br>8     | + | 169 | 180 | 6.52<br>E-05 | 0.236 | GGACATGGC<br>GGC |
| 1 | MAAVATGGC<br>BGM | RP11-<br>354P11.4 | - | 129 | 140 | 6.65<br>E-05 | 0.24  | GAAGATGGA<br>TGT |
| 1 | MAAVATGGC<br>BGM | RRM1              | + | 5   | 16  | 6.79<br>E-05 | 0.244 | AAACATGGT<br>AGC |
| 1 | MAAVATGGC<br>BGM | AC010999.<br>1    | - | 71  | 82  | 6.90<br>E-05 | 0.246 | AAAAATGGA<br>CCC |
| 1 | MAAVATGGC<br>BGM | RP11-<br>378E13.3 | + | 96  | 107 | 6.90<br>E-05 | 0.246 | AAACATGGC<br>TCA |
| 1 | MAAVATGGC<br>BGM | NGRN              | + | 51  | 62  | 6.94<br>E-05 | 0.247 | CGACATGGC<br>GGT |
| 1 | MAAVATGGC<br>BGM | ATP5EP2           | + | 151 | 162 | 7.13<br>E-05 | 0.253 | CAGCATGGT<br>GGC |
| 1 | MAAVATGGC<br>BGM | RP11-<br>571F15.2 | - | 122 | 133 | 7.18<br>E-05 | 0.254 | AAAAATGGC<br>CTT |
| 1 | MAAVATGGC<br>BGM | CCDC74B<br>P1     | + | 95  | 106 | 7.23<br>E-05 | 0.255 | CAGCATGGC<br>CAC |
| 1 | MAAVATGGC<br>BGM | RP11-<br>16C1.1   | - | 176 | 187 | 7.37<br>E-05 | 0.257 | AAGGATGGC<br>GGT |
| 1 | MAAVATGGC        | RP11-             | - | 74  | 85  | 7.45         | 0.257 | GAAGATGGT        |

|   | BGM              | 91P24.1           |   |     |     | E-05         |       | TGT              |
|---|------------------|-------------------|---|-----|-----|--------------|-------|------------------|
| 1 | MAAVATGGC<br>BGM | SCAF4             | - | 91  | 102 | 7.45<br>E-05 | 0.257 | CGGGATGGC<br>GGC |
| 1 | MAAVATGGC<br>BGM | RP11-<br>368N21.5 | - | 128 | 139 | 7.45<br>E-05 | 0.257 | CAACATGGA<br>GAA |
| 1 | MAAVATGGC<br>BGM | CTD-<br>2561B21.8 | + | 52  | 63  | 7.45<br>E-05 | 0.257 | CAACATGGA<br>GAA |
| 1 | MAAVATGGC<br>BGM | ATP5C1P1          | - | 95  | 106 | 7.49<br>E-05 | 0.257 | GAACATGGT<br>AGC |
| 1 | MAAVATGGC<br>BGM | ATP5C1            | - | 174 | 185 | 7.49<br>E-05 | 0.257 | GAACATGGT<br>AGC |
| 1 | MAAVATGGC<br>BGM | Z85986.1          | + | 70  | 81  | 7.49<br>E-05 | 0.257 | CATAATGGC<br>AGC |
| 1 | MAAVATGGC<br>BGM | TRIB3             | - | 90  | 101 | 7.62<br>E-05 | 0.259 | CAGGATGGA<br>AGC |
| 1 | MAAVATGGC<br>BGM | RP3-<br>405J10.4  | + | 125 | 136 | 7.62<br>E-05 | 0.259 | AAAAATGGC<br>ACA |
| 1 | MAAVATGGC<br>BGM | DYNLT1            | + | 128 | 139 | 7.62<br>E-05 | 0.259 | AAAGATGGA<br>AGA |
| 1 | MAAVATGGC<br>BGM | DHCR7             | - | 75  | 86  | 7.70<br>E-05 | 0.261 | AAACATGGC<br>TAA |
| 1 | MAAVATGGC<br>BGM | RP4-<br>718P11.1  | + | 181 | 192 | 7.82<br>E-05 | 0.264 | GGAGATGGC<br>AGC |
| 1 | MAAVATGGC<br>BGM | AC012513.<br>4    | + | 97  | 108 | 7.88<br>E-05 | 0.264 | TAAAATGGA<br>GGT |
| 1 | MAAVATGGC<br>BGM | SNORD6            | + | 151 | 162 | 7.88<br>E-05 | 0.264 | GAAAATGGC<br>CTT |
| 1 | MAAVATGGC<br>BGM | G6PC2             | + | 189 | 200 | 7.96<br>E-05 | 0.265 | CAAGATGGA<br>TTT |
| 1 | MAAVATGGC<br>BGM | AGER              | + | 106 | 117 | 8.03<br>E-05 | 0.265 | AAAGATGGG<br>GGC |
| 1 | MAAVATGGC<br>BGM | RPL7A             | + | 109 | 120 | 8.03<br>E-05 | 0.265 | CAAGATGGT<br>GAG |
| 1 | MAAVATGGC<br>BGM | RPS15             | + | 165 | 176 | 8.03<br>E-05 | 0.265 | CAAGATGGT<br>GAG |
| 1 | MAAVATGGC<br>BGM | RPL7L1P2          | - | 42  | 53  | 8.08<br>E-05 | 0.265 | GAAGATGGC<br>ACT |
| 1 | MAAVATGGC<br>BGM | CTC-<br>518B2.9   | - | 78  | 89  | 8.08<br>E-05 | 0.265 | GAGGATGGC<br>GGT |
| 1 | MAAVATGGC<br>BGM | RP11-<br>15I20.1  | + | 124 | 135 | 8.15<br>E-05 | 0.265 | CAGCATGGC<br>CTC |
| 1 | MAAVATGGC<br>BGM | DDX3X             | - | 7   | 18  | 8.31<br>E-05 | 0.265 | CACAATGGC<br>CCC |
| 1 | MAAVATGGC<br>BGM | RPL13AP5          | + | 37  | 48  | 8.31<br>E-05 | 0.265 | CAACATGGT<br>GAA |
| 1 | MAAVATGGC        | RP11-             | - | 27  | 38  | 8.31         | 0.265 | CAACATGGT        |

|   |                  |                   |   |     |     |              |       |                  |
|---|------------------|-------------------|---|-----|-----|--------------|-------|------------------|
|   | BGM              | 354E23.3          |   |     |     | E-05         |       | GAA              |
| 1 | MAAVATGGC<br>BGM | RPL41P2           | + | 55  | 66  | 8.31<br>E-05 | 0.265 | CAACATGGT<br>GAA |
| 1 | MAAVATGGC<br>BGM | RNU1-<br>134P     | + | 57  | 68  | 8.31<br>E-05 | 0.265 | CAACATGGT<br>GAA |
| 1 | MAAVATGGC<br>BGM | RP11-<br>530C5.2  | - | 113 | 124 | 8.31<br>E-05 | 0.265 | CAACATGGT<br>GAA |
| 1 | MAAVATGGC<br>BGM | RP11-<br>650L12.2 | - | 183 | 194 | 8.31<br>E-05 | 0.265 | CAACATGGT<br>GAA |
| 1 | MAAVATGGC<br>BGM | EEF1A1P1<br>9     | + | 25  | 36  | 8.39<br>E-05 | 0.265 | GAAAATGGC<br>TTT |
| 1 | MAAVATGGC<br>BGM | RP11-<br>165N19.2 | + | 141 | 152 | 8.39<br>E-05 | 0.265 | GAAAATGGC<br>ACA |
| 1 | MAAVATGGC<br>BGM | RPL29P14          | + | 152 | 163 | 8.39<br>E-05 | 0.265 | GAAAATGGC<br>ACA |
| 1 | MAAVATGGC<br>BGM | RPL29P11          | + | 168 | 179 | 8.39<br>E-05 | 0.265 | GAAAATGGC<br>ACA |
| 1 | MAAVATGGC<br>BGM | RP3-<br>405J10.4  | - | 181 | 192 | 8.39<br>E-05 | 0.265 | GAAGATGGA<br>AGA |
| 1 | MAAVATGGC<br>BGM | MT-ND2            | - | 31  | 42  | 8.58<br>E-05 | 0.269 | AAAGATGGT<br>AGA |
| 1 | MAAVATGGC<br>BGM | RP11-<br>660M5.1  | + | 112 | 123 | 8.58<br>E-05 | 0.269 | AAAAATGGC<br>AAA |
| 1 | MAAVATGGC<br>BGM | MTND2P2<br>8      | - | 131 | 142 | 8.58<br>E-05 | 0.269 | AAAGATGGT<br>AGA |
| 1 | MAAVATGGC<br>BGM | HNRNPA1<br>P17    | - | 95  | 106 | 8.72<br>E-05 | 0.272 | AGACATGGC<br>TGC |
| 1 | MAAVATGGC<br>BGM | RP11-<br>158H5.2  | - | 31  | 42  | 8.77<br>E-05 | 0.273 | CAACATGGC<br>AAG |
| 1 | MAAVATGGC<br>BGM | RP11-<br>325L12.5 | + | 99  | 110 | 8.93<br>E-05 | 0.275 | CAAGATGGA<br>AAA |
| 1 | MAAVATGGC<br>BGM | KB-<br>1958F4.1   | + | 129 | 140 | 8.93<br>E-05 | 0.275 | TAAAATGGA<br>GTC |
| 1 | MAAVATGGC<br>BGM | IKBKAP            | - | 144 | 155 | 8.93<br>E-05 | 0.275 | AAGGATGGA<br>GGC |
| 1 | MAAVATGGC<br>BGM | IRF2BP2           | + | 128 | 139 | 9.04<br>E-05 | 0.277 | GGACATGGC<br>CGC |
| 1 | MAAVATGGC<br>BGM | RP11-<br>206L10.2 | - | 119 | 130 | 9.04<br>E-05 | 0.277 | CACCATGGC<br>GCC |
| 1 | MAAVATGGC<br>BGM | CTD-<br>2636A23.2 | + | 189 | 200 | 9.09<br>E-05 | 0.278 | AAGGATGGC<br>CCC |
| 1 | MAAVATGGC<br>BGM | CTB-<br>58E17.9   | - | 109 | 120 | 9.34<br>E-05 | 0.284 | TAGGATGGC<br>GCC |
| 1 | MAAVATGGC<br>BGM | H3F3C             | + | 172 | 183 | 9.34<br>E-05 | 0.284 | GAAAATGGC<br>CCG |
| 1 | MAAVATGGC        | HSPA8P5           | - | 95  | 106 | 9.40         | 0.285 | CGACATGGT        |

|   | BGM              |         |   |     |     | E-05         |       | GGC              |
|---|------------------|---------|---|-----|-----|--------------|-------|------------------|
| 1 | MAAVATGGC<br>BGM | RN7SL3  | + | 87  | 98  | 9.47<br>E-05 | 0.286 | CAATATGGT<br>GAC |
| 1 | MAAVATGGC<br>BGM | LYRM2   | + | 134 | 145 | 9.56<br>E-05 | 0.288 | GGACATGGC<br>TGC |
| 1 | MAAVATGGC<br>BGM | SNORD39 | - | 117 | 128 | 9.74<br>E-05 | 0.292 | CAGCATGGC<br>AGA |
| 1 | MAAVATGGC<br>BGM | PAPPA2  | + | 76  | 87  | 9.94<br>E-05 | 0.297 | AAAGATGGA<br>AAC |
